# Supplementary material for: Mapping the underlying drivers of resistome risk across diverse environments
Source: Research Square preprint supplement (doi:10.21203/rs.3.rs-7085902/v1), 2025-10-23
Supplement: Supplementary file 1 [file 75432f773abac183229ce217.xlsx]

## Sheet: Table S1
Table S1: Overview of search terms used to query the NCBI SRA database for publicly available metagenomic sequencing data across all environments.
Environment	Search Terms Used
Wastewater Influent	“influent metagenome” OR “raw sewage metagenome” OR “wastewater influent”
Wastewater Effluent	“effluent metagenome” OR “wastewater effluent”
Activated Sludge	“activated sludge metagenome” OR "activated sludge"
Hospital Sewage	“hospital sewage metagenome” OR “hospital sewage”
Surface Water	“surface water metagenome” OR “surface water”
Soil	“soil metagenome” OR “soil”
Sediment	“sediment metagenome” OR “sediment”
Cow Manure	“cow feces metagenome” OR “cow feces metagnome”
Pig Feces	“pig feces metagenome” OR “pig feces”
Chicken Feces	“chicken feces metagenome” OR “chicken feces”
Migratory Bird Droppings	“migratory bird metagenome” OR “migratory birds” OR “migratory bird feces”
Human Gut	“human gut metagenome” OR “human gut”

## Sheet: Table S2
Table S2: Metadata for all downloaded metagenomic samples.
Accession_ID	Project_ID	Environment	Country	Continent	Giga_Base_Pairs
SRR20852506	PRJNA866331	Hospital Sewage	China	Asia	15.3
SRR20852507	PRJNA866331	Hospital Sewage	China	Asia	13.3
SRR20852508	PRJNA866331	Hospital Sewage	China	Asia	13.9
SRR20852509	PRJNA866331	Hospital Sewage	China	Asia	12.9
SRR20852510	PRJNA866331	Hospital Sewage	China	Asia	14.4
SRR20852511	PRJNA866331	Hospital Sewage	China	Asia	13.5
SRR20852512	PRJNA866331	Hospital Sewage	China	Asia	13.3
SRR20852513	PRJNA866331	Hospital Sewage	China	Asia	12.8
SRR20852514	PRJNA866331	Hospital Sewage	China	Asia	12.9
SRR20852515	PRJNA866331	Hospital Sewage	China	Asia	13
SRR20852516	PRJNA866331	Hospital Sewage	China	Asia	13.9
SRR20852517	PRJNA866331	Hospital Sewage	China	Asia	14.6
SRR20852518	PRJNA866331	Hospital Sewage	China	Asia	14.4
SRR20852519	PRJNA866331	Hospital Sewage	China	Asia	13.1
SRR20852520	PRJNA866331	Hospital Sewage	China	Asia	12.7
SRR20852521	PRJNA866331	Hospital Sewage	China	Asia	10.9
SRR20852522	PRJNA866331	Hospital Sewage	China	Asia	13.6
SRR20852523	PRJNA866331	Hospital Sewage	China	Asia	14
SRR20852524	PRJNA866331	Hospital Sewage	China	Asia	13.9
SRR20852525	PRJNA866331	Hospital Sewage	China	Asia	12.6
SRR11088386	PRJNA524094	Hospital Sewage	Germany	Europe	11.9
SRR11088403	PRJNA524094	Hospital Sewage	Germany	Europe	10.5
SRR11088412	PRJNA524094	Hospital Sewage	Germany	Europe	10.2
SRR11088470	PRJNA524094	Hospital Sewage	Germany	Europe	10.9
ERR3519521	PRJEB34410	Hospital Sewage	United Kingdom	Europe	11.2
ERR3519522	PRJEB34410	Hospital Sewage	United Kingdom	Europe	11.2
ERR3519523	PRJEB34410	Hospital Sewage	United Kingdom	Europe	11.6
ERR3519524	PRJEB34410	Hospital Sewage	United Kingdom	Europe	11.5
ERR3519526	PRJEB34410	Hospital Sewage	United Kingdom	Europe	11.4
ERR3519527	PRJEB34410	Hospital Sewage	United Kingdom	Europe	10.6
ERR11269298	PRJEB60913	Hospital Sewage	United Kingdom	Europe	15.6
ERR11269302	PRJEB60913	Hospital Sewage	United Kingdom	Europe	16.7
ERR11269309	PRJEB60913	Hospital Sewage	United Kingdom	Europe	16.3
SRR22681113	PRJNA909358	Hospital Sewage	China	Asia	18
SRR22681127	PRJNA909358	Hospital Sewage	China	Asia	11.6
SRR12917032	PRJNA672704	Hospital Sewage	USA	North America	8.2
SRR12917049	PRJNA672704	Hospital Sewage	India	Asia	7.5
SRR11088387	PRJNA524094	Hospital Sewage	Germany	Europe	9.9
SRR11088393	PRJNA524094	Hospital Sewage	Germany	Europe	6.6
SRR11088421	PRJNA524094	Hospital Sewage	Germany	Europe	9.5
SRR11088430	PRJNA524094	Hospital Sewage	Germany	Europe	7
SRR11088440	PRJNA524094	Hospital Sewage	Germany	Europe	7.4
SRR11088455	PRJNA524094	Hospital Sewage	Germany	Europe	7.3
SRR11088459	PRJNA524094	Hospital Sewage	Germany	Europe	9.7
SRR11088480	PRJNA524094	Hospital Sewage	Germany	Europe	8.8
SRR13003733	PRJNA675192	Hospital Sewage	China	Asia	5.8
SRR13003734	PRJNA675192	Hospital Sewage	China	Asia	6
SRR13003735	PRJNA675192	Hospital Sewage	China	Asia	8.9
SRR13003736	PRJNA675192	Hospital Sewage	China	Asia	6.2
SRR13003738	PRJNA675192	Hospital Sewage	China	Asia	6.1
SRR13003739	PRJNA675192	Hospital Sewage	China	Asia	6.4
SRR13003740	PRJNA675192	Hospital Sewage	China	Asia	6.1
SRR13003743	PRJNA675192	Hospital Sewage	China	Asia	6.6
SRR13003744	PRJNA675192	Hospital Sewage	China	Asia	5.6
SRR13003745	PRJNA675192	Hospital Sewage	China	Asia	6.6
SRR13003746	PRJNA675192	Hospital Sewage	China	Asia	7.2
SRR13003754	PRJNA675192	Hospital Sewage	China	Asia	5.4
SRR13003737	PRJNA675192	Hospital Sewage	China	Asia	7.6
SRR13003741	PRJNA675192	Hospital Sewage	China	Asia	6.2
SRR13003747	PRJNA675192	Hospital Sewage	China	Asia	6.4
SRR13003748	PRJNA675192	Hospital Sewage	China	Asia	7.1
SRR13003749	PRJNA675192	Hospital Sewage	China	Asia	5.9
SRR13003751	PRJNA675192	Hospital Sewage	China	Asia	6.9
SRR13003752	PRJNA675192	Hospital Sewage	China	Asia	7.4
SRR13003753	PRJNA675192	Hospital Sewage	China	Asia	5.8
SRR13003755	PRJNA675192	Hospital Sewage	China	Asia	5.9
SRR13003756	PRJNA675192	Hospital Sewage	China	Asia	7.6
SRR22681114	PRJNA909358	Hospital Sewage	China	Asia	6.7
SRR22681115	PRJNA909358	Hospital Sewage	China	Asia	8.9
SRR22681117	PRJNA909358	Hospital Sewage	China	Asia	5.4
SRR22681121	PRJNA909358	Hospital Sewage	China	Asia	7.1
SRR22681122	PRJNA909358	Hospital Sewage	China	Asia	5.9
SRR22681123	PRJNA909358	Hospital Sewage	China	Asia	7.6
SRR22681124	PRJNA909358	Hospital Sewage	China	Asia	7.4
SRR22681125	PRJNA909358	Hospital Sewage	China	Asia	5.9
SRR22681130	PRJNA909358	Hospital Sewage	China	Asia	7.8
SRR22681131	PRJNA909358	Hospital Sewage	China	Asia	6.1
SRR22681132	PRJNA909358	Hospital Sewage	China	Asia	7.9
SRR22681133	PRJNA909358	Hospital Sewage	China	Asia	8
SRR22681134	PRJNA909358	Hospital Sewage	China	Asia	7.5
SRR22681135	PRJNA909358	Hospital Sewage	China	Asia	6.9
SRR22681136	PRJNA909358	Hospital Sewage	China	Asia	6
SRR22681137	PRJNA909358	Hospital Sewage	China	Asia	6.8
SRR22681138	PRJNA909358	Hospital Sewage	China	Asia	9.7
SRR22681139	PRJNA909358	Hospital Sewage	China	Asia	6.2
SRR22681141	PRJNA909358	Hospital Sewage	China	Asia	6.3
SRR22681142	PRJNA909358	Hospital Sewage	China	Asia	5.9
SRR22681143	PRJNA909358	Hospital Sewage	China	Asia	5.5
SRR22681146	PRJNA909358	Hospital Sewage	China	Asia	5.8
SRR22681147	PRJNA909358	Hospital Sewage	China	Asia	6.3
SRR22681148	PRJNA909358	Hospital Sewage	China	Asia	5.4
SRR22681149	PRJNA909358	Hospital Sewage	China	Asia	6.1
SRR22681151	PRJNA909358	Hospital Sewage	China	Asia	6.7
ERR7015328	PRJEB47975	Hospital Sewage	Benin	Africa	10.4
ERR7015329	PRJEB47975	Hospital Sewage	Benin	Africa	10.2
ERR7015330	PRJEB47975	Hospital Sewage	Benin	Africa	10.2
ERR7015343	PRJEB47975	Hospital Sewage	Benin	Africa	11.1
ERR7015344	PRJEB47975	Hospital Sewage	Benin	Africa	12.4
ERR7015345	PRJEB47975	Hospital Sewage	Benin	Africa	10.7
ERR7015346	PRJEB47975	Hospital Sewage	Benin	Africa	11.2
ERR7015347	PRJEB47975	Hospital Sewage	Benin	Africa	11.1
ERR7015348	PRJEB47975	Hospital Sewage	Benin	Africa	10.9
ERR7015350	PRJEB47975	Hospital Sewage	Benin	Africa	10.5
ERR7015351	PRJEB47975	Hospital Sewage	Benin	Africa	11.5
ERR7015362	PRJEB47975	Hospital Sewage	Burkina Faso	Africa	10.2
ERR7015367	PRJEB47975	Hospital Sewage	Burkina Faso	Africa	12.3
ERR7015368	PRJEB47975	Hospital Sewage	Burkina Faso	Africa	10.7
ERR7015369	PRJEB47975	Hospital Sewage	Burkina Faso	Africa	11.3
ERR7015373	PRJEB47975	Hospital Sewage	Burkina Faso	Africa	10.1
ERR7015374	PRJEB47975	Hospital Sewage	Burkina Faso	Africa	11.3
ERR7015375	PRJEB47975	Hospital Sewage	Burkina Faso	Africa	10
ERR7015376	PRJEB47975	Hospital Sewage	Burkina Faso	Africa	10.8
ERR7015379	PRJEB47975	Hospital Sewage	Burkina Faso	Africa	10.5
ERR7015380	PRJEB47975	Hospital Sewage	Burkina Faso	Africa	10.2
ERR7015385	PRJEB47975	Hospital Sewage	Burkina Faso	Africa	10.2
ERR7015387	PRJEB47975	Hospital Sewage	Burkina Faso	Africa	11.3
ERR7015389	PRJEB47975	Hospital Sewage	Burkina Faso	Africa	10.1
ERR7015390	PRJEB47975	Hospital Sewage	Burkina Faso	Africa	11.1
ERR7015391	PRJEB47975	Hospital Sewage	Burkina Faso	Africa	11.2
ERR7015393	PRJEB47975	Hospital Sewage	Burkina Faso	Africa	10.4
ERR7015394	PRJEB47975	Hospital Sewage	Burkina Faso	Africa	10.3
ERR7015395	PRJEB47975	Hospital Sewage	Finland	Europe	6.4
ERR7015397	PRJEB47975	Hospital Sewage	Finland	Europe	9.3
ERR7015398	PRJEB47975	Hospital Sewage	Finland	Europe	7.3
ERR7015399	PRJEB47975	Hospital Sewage	Finland	Europe	8.1
ERR7015400	PRJEB47975	Hospital Sewage	Finland	Europe	7.6
ERR7015401	PRJEB47975	Hospital Sewage	Finland	Europe	8
ERR7015402	PRJEB47975	Hospital Sewage	Finland	Europe	8.5
ERR7015403	PRJEB47975	Hospital Sewage	Finland	Europe	7.1
SRR9850927	PRJNA556790	Migratory Bird Droppings	China	Asia	14.1
SRR21527946	PRJNA879251	Migratory Bird Droppings	USA	North America	14
SRR9850966	PRJNA556790	Migratory Bird Droppings	China	Asia	12.2
SRR21527956	PRJNA879251	Migratory Bird Droppings	USA	North America	12
SRR9850997	PRJNA556790	Migratory Bird Droppings	China	Asia	11.8
SRR9850947	PRJNA556790	Migratory Bird Droppings	China	Asia	11.6
SRR9850928	PRJNA556790	Migratory Bird Droppings	China	Asia	11.4
SRR9850929	PRJNA556790	Migratory Bird Droppings	China	Asia	11.4
SRR9850948	PRJNA556790	Migratory Bird Droppings	China	Asia	11.1
SRR10800386	PRJNA590085	Migratory Bird Droppings	China	Asia	10.9
SRR9850937	PRJNA556790	Migratory Bird Droppings	China	Asia	10.9
SRR9850935	PRJNA556790	Migratory Bird Droppings	China	Asia	10.9
SRR9850934	PRJNA556790	Migratory Bird Droppings	China	Asia	10.9
SRR9850936	PRJNA556790	Migratory Bird Droppings	China	Asia	10.9
SRR9850933	PRJNA556790	Migratory Bird Droppings	China	Asia	10.5
SRR9850932	PRJNA556790	Migratory Bird Droppings	China	Asia	10.5
SRR9850923	PRJNA556790	Migratory Bird Droppings	China	Asia	10.5
SRR9850963	PRJNA556790	Migratory Bird Droppings	China	Asia	10.4
SRR9850924	PRJNA556790	Migratory Bird Droppings	China	Asia	10.4
SRR9850915	PRJNA556790	Migratory Bird Droppings	China	Asia	10.3
ERR2863823	PRJEB29443	Migratory Bird Droppings	Iceland	Europe	10.1
SRR10492799	PRJNA589661	Migratory Bird Droppings	China	Asia	10.1
ERR2863811	PRJEB29443	Migratory Bird Droppings	Iceland	Europe	10.1
ERR2863809	PRJEB29443	Migratory Bird Droppings	Iceland	Europe	10
SRR10492797	PRJNA589661	Migratory Bird Droppings	China	Asia	10
SRR10492800	PRJNA589661	Migratory Bird Droppings	China	Asia	10
SRR9850991	PRJNA556790	Migratory Bird Droppings	China	Asia	9.9
SRR10492798	PRJNA589661	Migratory Bird Droppings	China	Asia	9.7
SRR9850916	PRJNA556790	Migratory Bird Droppings	China	Asia	9.5
SRR9850968	PRJNA556790	Migratory Bird Droppings	China	Asia	9.4
SRR9850942	PRJNA556790	Migratory Bird Droppings	China	Asia	9.4
SRR9850943	PRJNA556790	Migratory Bird Droppings	China	Asia	9.4
SRR9850913	PRJNA556790	Migratory Bird Droppings	China	Asia	9.2
SRR9850993	PRJNA556790	Migratory Bird Droppings	China	Asia	9.2
SRR9850988	PRJNA556790	Migratory Bird Droppings	China	Asia	9.1
SRR9850989	PRJNA556790	Migratory Bird Droppings	China	Asia	9.1
SRR9850992	PRJNA556790	Migratory Bird Droppings	China	Asia	9
SRR9850914	PRJNA556790	Migratory Bird Droppings	China	Asia	9
SRR10800388	PRJNA590085	Migratory Bird Droppings	China	Asia	9
SRR9850998	PRJNA556790	Migratory Bird Droppings	China	Asia	9
SRR9850946	PRJNA556790	Migratory Bird Droppings	China	Asia	8.7
SRR9850919	PRJNA556790	Migratory Bird Droppings	China	Asia	8.6
SRR9850986	PRJNA556790	Migratory Bird Droppings	China	Asia	8.6
SRR9850920	PRJNA556790	Migratory Bird Droppings	China	Asia	8.6
SRR9850908	PRJNA556790	Migratory Bird Droppings	China	Asia	8.6
SRR9850909	PRJNA556790	Migratory Bird Droppings	China	Asia	8.6
SRR9850990	PRJNA556790	Migratory Bird Droppings	China	Asia	8.4
SRR9850965	PRJNA556790	Migratory Bird Droppings	China	Asia	8.4
SRR9850970	PRJNA556790	Migratory Bird Droppings	China	Asia	8.4
SRR9850987	PRJNA556790	Migratory Bird Droppings	China	Asia	8.4
SRR9850918	PRJNA556790	Migratory Bird Droppings	China	Asia	8.3
SRR9850917	PRJNA556790	Migratory Bird Droppings	China	Asia	8.3
SRR9850949	PRJNA556790	Migratory Bird Droppings	China	Asia	8
SRR9850910	PRJNA556790	Migratory Bird Droppings	China	Asia	8
SRR9850911	PRJNA556790	Migratory Bird Droppings	China	Asia	8
SRR9850944	PRJNA556790	Migratory Bird Droppings	China	Asia	8
SRR9850922	PRJNA556790	Migratory Bird Droppings	China	Asia	7.9
SRR9850921	PRJNA556790	Migratory Bird Droppings	China	Asia	7.9
SRR9850971	PRJNA556790	Migratory Bird Droppings	China	Asia	7.9
SRR9850912	PRJNA556790	Migratory Bird Droppings	China	Asia	7.8
SRR9850907	PRJNA556790	Migratory Bird Droppings	China	Asia	7.8
SRR9850906	PRJNA556790	Migratory Bird Droppings	China	Asia	7.8
SRR9850939	PRJNA556790	Migratory Bird Droppings	China	Asia	7.8
SRR9850938	PRJNA556790	Migratory Bird Droppings	China	Asia	7.8
SRR9850964	PRJNA556790	Migratory Bird Droppings	China	Asia	7.6
SRR9850982	PRJNA556790	Migratory Bird Droppings	China	Asia	7.6
SRR9850969	PRJNA556790	Migratory Bird Droppings	China	Asia	7.5
SRR9850972	PRJNA556790	Migratory Bird Droppings	China	Asia	7.5
SRR9850945	PRJNA556790	Migratory Bird Droppings	China	Asia	7.4
SRR9850904	PRJNA556790	Migratory Bird Droppings	China	Asia	7.4
SRR9850905	PRJNA556790	Migratory Bird Droppings	China	Asia	7.4
SRR9850902	PRJNA556790	Migratory Bird Droppings	China	Asia	7.3
SRR9850903	PRJNA556790	Migratory Bird Droppings	China	Asia	7.3
SRR9850967	PRJNA556790	Migratory Bird Droppings	China	Asia	7.3
SRR10800397	PRJNA590085	Migratory Bird Droppings	China	Asia	6.9
ERR2863815	PRJEB29443	Migratory Bird Droppings	Iceland	Europe	6.8
SRR9850941	PRJNA556790	Migratory Bird Droppings	China	Asia	6.6
SRR9850940	PRJNA556790	Migratory Bird Droppings	China	Asia	6.6
ERR2863818	PRJEB29443	Migratory Bird Droppings	Iceland	Europe	6.5
SRR21527967	PRJNA879251	Migratory Bird Droppings	USA	North America	6.5
SRR9850985	PRJNA556790	Migratory Bird Droppings	China	Asia	6.4
SRR9850983	PRJNA556790	Migratory Bird Droppings	China	Asia	6.4
SRR21527944	PRJNA879251	Migratory Bird Droppings	USA	North America	6.2
SRR9850981	PRJNA556790	Migratory Bird Droppings	China	Asia	6.2
SRR9851003	PRJNA556892	Migratory Bird Droppings	China	Asia	6.2
ERR2863816	PRJEB29443	Migratory Bird Droppings	Iceland	Europe	6.2
SRR9850976	PRJNA556790	Migratory Bird Droppings	China	Asia	6.2
ERR2863807	PRJEB29443	Migratory Bird Droppings	Iceland	Europe	6
SRR10800387	PRJNA590085	Migratory Bird Droppings	China	Asia	6
ERR2863820	PRJEB29443	Migratory Bird Droppings	Iceland	Europe	5.9
SRR9850975	PRJNA556790	Migratory Bird Droppings	China	Asia	5.9
SRR21527943	PRJNA879251	Migratory Bird Droppings	USA	North America	5.9
SRR3327411	PRJNA316560	Migratory Bird Droppings	China	Asia	5.8
SRR3327572	PRJNA316570	Migratory Bird Droppings	China	Asia	5.8
SRR10800399	PRJNA590085	Migratory Bird Droppings	China	Asia	5.8
ERR4083996	PRJEB38078	Migratory Bird Droppings	Germany	Europe	5.7
SRR9850930	PRJNA556790	Migratory Bird Droppings	China	Asia	5.7
SRR9850931	PRJNA556790	Migratory Bird Droppings	China	Asia	5.7
SRR9850996	PRJNA556790	Migratory Bird Droppings	China	Asia	5.6
SRR9850926	PRJNA556790	Migratory Bird Droppings	China	Asia	5.5
SRR9850925	PRJNA556790	Migratory Bird Droppings	China	Asia	5.5
ERR2863817	PRJEB29443	Migratory Bird Droppings	Iceland	Europe	5.5
SRR9850984	PRJNA556790	Migratory Bird Droppings	China	Asia	5.5
SRR9850960	PRJNA556790	Migratory Bird Droppings	China	Asia	5.5
ERR2863810	PRJEB29443	Migratory Bird Droppings	Iceland	Europe	5.5
SRR3327573	PRJNA316570	Migratory Bird Droppings	China	Asia	5.4
SRR9850978	PRJNA556790	Migratory Bird Droppings	China	Asia	5.3
ERR2863826	PRJEB29443	Migratory Bird Droppings	Iceland	Europe	5.2
SRR9851004	PRJNA556790	Migratory Bird Droppings	China	Asia	5.2
SRR21527947	PRJNA879251	Migratory Bird Droppings	USA	North America	5.2
SRR9850977	PRJNA556790	Migratory Bird Droppings	China	Asia	5.1
ERR2863828	PRJEB29443	Migratory Bird Droppings	Iceland	Europe	5.1
ERR2863821	PRJEB29443	Migratory Bird Droppings	Iceland	Europe	5
SRR9850974	PRJNA556790	Migratory Bird Droppings	China	Asia	4.3
SRR9850980	PRJNA556790	Migratory Bird Droppings	China	Asia	3.5
SRR9850973	PRJNA556790	Migratory Bird Droppings	China	Asia	3.5
SRR9850979	PRJNA556790	Migratory Bird Droppings	China	Asia	3.3
ERR4191852	PRJEB38606	Chicken Feces	South Korea	Asia	11.7
ERR4191853	PRJEB38606	Chicken Feces	South Korea	Asia	18.7
ERR4191854	PRJEB38606	Chicken Feces	South Korea	Asia	19
ERR4191855	PRJEB38606	Chicken Feces	South Korea	Asia	12.9
ERR4191856	PRJEB38606	Chicken Feces	South Korea	Asia	14.7
ERR4191857	PRJEB38606	Chicken Feces	South Korea	Asia	14.2
ERR4191859	PRJEB38606	Chicken Feces	South Korea	Asia	14
ERR4191860	PRJEB38606	Chicken Feces	South Korea	Asia	14.2
ERR4191861	PRJEB38606	Chicken Feces	South Korea	Asia	11.6
ERR4191863	PRJEB38606	Chicken Feces	South Korea	Asia	11.6
ERR4191864	PRJEB38606	Chicken Feces	South Korea	Asia	11.5
ERR4191865	PRJEB38606	Chicken Feces	South Korea	Asia	10.3
ERR4191866	PRJEB38606	Chicken Feces	South Korea	Asia	12.6
ERR4191868	PRJEB38606	Chicken Feces	South Korea	Asia	19.4
ERR4191870	PRJEB38606	Chicken Feces	South Korea	Asia	10.7
ERR4191873	PRJEB38606	Chicken Feces	South Korea	Asia	10.2
ERR4191875	PRJEB38606	Chicken Feces	South Korea	Asia	12.1
ERR4191876	PRJEB38606	Chicken Feces	South Korea	Asia	11
ERR4191877	PRJEB38606	Chicken Feces	South Korea	Asia	10.7
ERR4191878	PRJEB38606	Chicken Feces	South Korea	Asia	12.5
ERR4191880	PRJEB38606	Chicken Feces	South Korea	Asia	18.5
ERR4191881	PRJEB38606	Chicken Feces	South Korea	Asia	10.4
SRR13783083	PRJNA704780	Chicken Feces	China	Asia	13.8
SRR13783084	PRJNA704780	Chicken Feces	China	Asia	10.7
SRR13783085	PRJNA704780	Chicken Feces	China	Asia	10.1
SRR13783087	PRJNA704780	Chicken Feces	China	Asia	11.1
SRR13783088	PRJNA704780	Chicken Feces	China	Asia	10.9
SRR13783090	PRJNA704780	Chicken Feces	China	Asia	10.2
SRR13089990	PRJNA678871	Chicken Feces	China	Asia	12.1
SRR13089992	PRJNA678871	Chicken Feces	China	Asia	14.8
SRR13089993	PRJNA678871	Chicken Feces	China	Asia	14.8
SRR13089994	PRJNA678871	Chicken Feces	China	Asia	13.4
SRR13089995	PRJNA678871	Chicken Feces	China	Asia	13
SRR13089997	PRJNA678871	Chicken Feces	China	Asia	13.4
SRR13089998	PRJNA678871	Chicken Feces	China	Asia	13.5
SRR13089999	PRJNA678871	Chicken Feces	China	Asia	13
SRR13090000	PRJNA678871	Chicken Feces	China	Asia	13.4
SRR13090001	PRJNA678871	Chicken Feces	China	Asia	12
SRR13090003	PRJNA678871	Chicken Feces	China	Asia	13.7
SRR13090004	PRJNA678871	Chicken Feces	China	Asia	12.4
SRR12730714	PRJNA666163	Chicken Feces	Canada	North America	16.6
SRR12730716	PRJNA666163	Chicken Feces	Canada	North America	17.8
SRR12730717	PRJNA666163	Chicken Feces	Canada	North America	16.1
SRR12730718	PRJNA666163	Chicken Feces	Canada	North America	15.9
SRR12730723	PRJNA666163	Chicken Feces	Canada	North America	17.6
SRR12730725	PRJNA666163	Chicken Feces	Canada	North America	17.8
SRR12730726	PRJNA666163	Chicken Feces	Canada	North America	15.3
SRR12730727	PRJNA666163	Chicken Feces	Canada	North America	17.2
SRR12730730	PRJNA666163	Chicken Feces	Canada	North America	17.3
SRR12730731	PRJNA666163	Chicken Feces	Canada	North America	18.1
SRR12730732	PRJNA666163	Chicken Feces	Canada	North America	15.8
SRR12730735	PRJNA666163	Chicken Feces	Canada	North America	15.9
SRR12730736	PRJNA666163	Chicken Feces	Canada	North America	20
SRR12730737	PRJNA666163	Chicken Feces	Canada	North America	17.9
SRR12730738	PRJNA666163	Chicken Feces	Canada	North America	18.4
SRR10897114	PRJNA601052	Chicken Feces	USA	North America	10.7
SRR10897115	PRJNA601052	Chicken Feces	USA	North America	11.4
SRR10897116	PRJNA601052	Chicken Feces	USA	North America	11.9
SRR10897117	PRJNA601052	Chicken Feces	USA	North America	11.3
SRR9113691	PRJNA543206	Chicken Feces	United Kingdom	Europe	6.7
SRR9113696	PRJNA543206	Chicken Feces	United Kingdom	Europe	5.9
SRR9113698	PRJNA543206	Chicken Feces	United Kingdom	Europe	9.6
SRR9113699	PRJNA543206	Chicken Feces	United Kingdom	Europe	7.3
SRR9113702	PRJNA543206	Chicken Feces	United Kingdom	Europe	6.9
SRR9113704	PRJNA543206	Chicken Feces	United Kingdom	Europe	7.7
SRR9113705	PRJNA543206	Chicken Feces	United Kingdom	Europe	8.5
SRR9113706	PRJNA543206	Chicken Feces	United Kingdom	Europe	5.8
SRR9113707	PRJNA543206	Chicken Feces	United Kingdom	Europe	6
SRR9113708	PRJNA543206	Chicken Feces	United Kingdom	Europe	8.3
SRR9113710	PRJNA543206	Chicken Feces	United Kingdom	Europe	11.2
SRR9113711	PRJNA543206	Chicken Feces	United Kingdom	Europe	5
SRR9113712	PRJNA543206	Chicken Feces	United Kingdom	Europe	11.4
SRR9113713	PRJNA543206	Chicken Feces	United Kingdom	Europe	7
SRR9113714	PRJNA543206	Chicken Feces	United Kingdom	Europe	5.5
SRR9113716	PRJNA543206	Chicken Feces	United Kingdom	Europe	9.4
SRR9113722	PRJNA543206	Chicken Feces	United Kingdom	Europe	9.7
SRR9113723	PRJNA543206	Chicken Feces	United Kingdom	Europe	8
SRR9113724	PRJNA543206	Chicken Feces	United Kingdom	Europe	9.7
SRR9113725	PRJNA543206	Chicken Feces	United Kingdom	Europe	5.7
SRR9113726	PRJNA543206	Chicken Feces	United Kingdom	Europe	8.2
SRR9113728	PRJNA543206	Chicken Feces	United Kingdom	Europe	9.8
SRR9113729	PRJNA543206	Chicken Feces	United Kingdom	Europe	7.6
SRR9113731	PRJNA543206	Chicken Feces	United Kingdom	Europe	9.7
SRR9113735	PRJNA543206	Chicken Feces	United Kingdom	Europe	11.8
SRR9113736	PRJNA543206	Chicken Feces	United Kingdom	Europe	5.6
SRR9113737	PRJNA543206	Chicken Feces	United Kingdom	Europe	5.8
SRR10098297	PRJNA563872	Cow Manure	USA	North America	14.4
SRR10098298	PRJNA563872	Cow Manure	USA	North America	10.8
SRR10098299	PRJNA563872	Cow Manure	USA	North America	10.2
SRR10098306	PRJNA563872	Cow Manure	USA	North America	12.1
SRR10098317	PRJNA563872	Cow Manure	USA	North America	12.2
SRR10098322	PRJNA563872	Cow Manure	USA	North America	12.7
SRR7686597	PRJNA485488	Cow Manure	USA	North America	18
SRR7686600	PRJNA485488	Cow Manure	USA	North America	15.4
SRR7686593	PRJNA485488	Cow Manure	USA	North America	6.6
SRR7686596	PRJNA485488	Cow Manure	USA	North America	5.7
SRR7686601	PRJNA485488	Cow Manure	USA	North America	7.8
SRR7686604	PRJNA485488	Cow Manure	USA	North America	9.7
SRR10098300	PRJNA563872	Cow Manure	USA	North America	9.4
SRR10098324	PRJNA563872	Cow Manure	USA	North America	9.9
SRR11038085	PRJNA605251	Cow Manure	Israel	Asia	16.2
ERR3220178	PRJEB31266	Cow Manure	United Kingdom	Europe	18.2
ERR3220183	PRJEB31266	Cow Manure	United Kingdom	Europe	19.8
ERR3220184	PRJEB31266	Cow Manure	United Kingdom	Europe	19.4
ERR3220203	PRJEB31266	Cow Manure	United Kingdom	Europe	18.4
ERR3220204	PRJEB31266	Cow Manure	United Kingdom	Europe	17.4
ERR3220205	PRJEB31266	Cow Manure	United Kingdom	Europe	19.6
ERR3220206	PRJEB31266	Cow Manure	United Kingdom	Europe	19.9
ERR3220207	PRJEB31266	Cow Manure	United Kingdom	Europe	18.7
ERR3220208	PRJEB31266	Cow Manure	United Kingdom	Europe	18.1
ERR3220209	PRJEB31266	Cow Manure	United Kingdom	Europe	19.5
ERR3220210	PRJEB31266	Cow Manure	United Kingdom	Europe	19.5
ERR3220211	PRJEB31266	Cow Manure	United Kingdom	Europe	17.7
ERR3220212	PRJEB31266	Cow Manure	United Kingdom	Europe	17.1
ERR3220213	PRJEB31266	Cow Manure	United Kingdom	Europe	18.1
ERR3220214	PRJEB31266	Cow Manure	United Kingdom	Europe	20
ERR3220216	PRJEB31266	Cow Manure	United Kingdom	Europe	18.8
ERR3220218	PRJEB31266	Cow Manure	United Kingdom	Europe	17.7
ERR3220219	PRJEB31266	Cow Manure	United Kingdom	Europe	18.5
ERR3220220	PRJEB31266	Cow Manure	United Kingdom	Europe	18.1
SRR14423985	PRJNA726965	Cow Manure	USA	North America	19.6
SRR14423987	PRJNA726965	Cow Manure	USA	North America	18.7
SRR14423989	PRJNA726965	Cow Manure	USA	North America	17.4
SRR14423990	PRJNA726965	Cow Manure	USA	North America	16.1
SRR14423991	PRJNA726965	Cow Manure	USA	North America	19.7
SRR14423992	PRJNA726965	Cow Manure	USA	North America	15.7
SRR14423995	PRJNA726965	Cow Manure	USA	North America	18.3
SRR14423999	PRJNA726965	Cow Manure	USA	North America	16.8
SRR14424000	PRJNA726965	Cow Manure	USA	North America	17.4
SRR14424001	PRJNA726965	Cow Manure	USA	North America	19
SRR14424002	PRJNA726965	Cow Manure	USA	North America	17.2
SRR14424003	PRJNA726965	Cow Manure	USA	North America	15.3
SRR14424005	PRJNA726965	Cow Manure	USA	North America	16.2
SRR14424006	PRJNA726965	Cow Manure	USA	North America	16.7
SRR14424009	PRJNA726965	Cow Manure	USA	North America	16.2
SRR14424010	PRJNA726965	Cow Manure	USA	North America	19.5
SRR14424011	PRJNA726965	Cow Manure	USA	North America	16.3
SRR17191898	PRJNA785864	Cow Manure	Russia	Europe	18.8
SRR17191900	PRJNA785864	Cow Manure	Russia	Europe	18.8
SRR17191903	PRJNA785864	Cow Manure	Russia	Europe	16.5
SRR17191907	PRJNA785864	Cow Manure	Russia	Europe	16.9
SRR22328605	PRJNA785979	Cow Manure	Russia	Europe	17.6
SRR13343629	PRJNA686811	Cow Manure	China	Asia	12.1
SRR13343630	PRJNA686811	Cow Manure	China	Asia	12.3
SRR13343631	PRJNA686811	Cow Manure	China	Asia	12.5
SRR13343632	PRJNA686811	Cow Manure	China	Asia	10.8
SRR13343633	PRJNA686811	Cow Manure	China	Asia	13.3
SRR13343634	PRJNA686811	Cow Manure	China	Asia	12.7
SRR13343635	PRJNA686811	Cow Manure	China	Asia	13.9
SRR13343636	PRJNA686811	Cow Manure	China	Asia	14.1
SRR13343637	PRJNA686811	Cow Manure	China	Asia	13.8
ERR5671698	PRJEB43305	Cow Manure	Switzerland	Europe	12.4
ERR5671704	PRJEB43305	Cow Manure	Switzerland	Europe	13.1
ERR5671705	PRJEB43305	Cow Manure	Switzerland	Europe	11.6
ERR5671706	PRJEB43305	Cow Manure	Switzerland	Europe	13.1
ERR5671722	PRJEB43305	Cow Manure	Switzerland	Europe	11.1
ERR5683758	PRJEB43305	Cow Manure	Switzerland	Europe	10.5
ERR5683760	PRJEB43305	Cow Manure	Switzerland	Europe	10.5
SRR6425778	PRJNA427653	Cow Manure	China	Asia	5.8
SRR6425779	PRJNA427653	Cow Manure	China	Asia	6.7
SRR6425780	PRJNA427653	Cow Manure	China	Asia	7.5
SRR6425781	PRJNA427653	Cow Manure	China	Asia	9
SRR6425814	PRJNA427653	Cow Manure	China	Asia	6.8
SRR6425815	PRJNA427653	Cow Manure	China	Asia	7.8
SRR10765500	PRJNA597489	Cow Manure	China	Asia	7.3
SRR10765501	PRJNA597489	Cow Manure	China	Asia	7.3
SRR10765502	PRJNA597489	Cow Manure	China	Asia	7.3
SRR10765503	PRJNA597489	Cow Manure	China	Asia	7.2
SRR10765504	PRJNA597489	Cow Manure	China	Asia	6.9
SRR10765505	PRJNA597489	Cow Manure	China	Asia	8.2
SRR10765506	PRJNA597489	Cow Manure	China	Asia	8.5
SRR10765507	PRJNA597489	Cow Manure	China	Asia	7.5
SRR8591572	PRJNA522848	Cow Manure	China	Asia	8.4
SRR8591573	PRJNA522848	Cow Manure	China	Asia	8.8
SRR8591574	PRJNA522848	Cow Manure	China	Asia	9.5
SRR8591575	PRJNA522848	Cow Manure	China	Asia	9
SRR8591576	PRJNA522848	Cow Manure	China	Asia	9.3
SRR8591577	PRJNA522848	Cow Manure	China	Asia	8.9
SRR8591578	PRJNA522848	Cow Manure	China	Asia	8.4
SRR8591579	PRJNA522848	Cow Manure	China	Asia	8.1
SRR8591580	PRJNA522848	Cow Manure	China	Asia	9.3
SRR8591581	PRJNA522848	Cow Manure	China	Asia	9.7
SRR8591583	PRJNA522848	Cow Manure	China	Asia	8.6
SRR12268554	PRJNA647157	Pig Feces	China	Asia	13.9
SRR12268555	PRJNA647157	Pig Feces	China	Asia	12.8
SRR12268556	PRJNA647157	Pig Feces	China	Asia	14.1
SRR12268557	PRJNA647157	Pig Feces	China	Asia	11.6
SRR12268558	PRJNA647157	Pig Feces	China	Asia	15.4
SRR12268559	PRJNA647157	Pig Feces	China	Asia	15.2
SRR12268560	PRJNA647157	Pig Feces	China	Asia	15.1
SRR12268561	PRJNA647157	Pig Feces	China	Asia	13.8
SRR12268562	PRJNA647157	Pig Feces	China	Asia	17.6
SRR12268563	PRJNA647157	Pig Feces	China	Asia	12.3
SRR12268564	PRJNA647157	Pig Feces	China	Asia	13.3
SRR17241479	PRJNA788462	Pig Feces	USA	North America	13.3
SRR17241485	PRJNA788462	Pig Feces	USA	North America	17.9
SRR17241486	PRJNA788462	Pig Feces	USA	North America	19.5
SRR17241493	PRJNA788462	Pig Feces	USA	North America	12.3
SRR17241494	PRJNA788462	Pig Feces	USA	North America	16.4
SRR17241495	PRJNA788462	Pig Feces	USA	North America	17.8
SRR17241496	PRJNA788462	Pig Feces	USA	North America	17.7
SRR17241497	PRJNA788462	Pig Feces	USA	North America	18.4
SRR17241498	PRJNA788462	Pig Feces	USA	North America	19.3
SRR17241499	PRJNA788462	Pig Feces	USA	North America	18.8
SRR17241502	PRJNA788462	Pig Feces	USA	North America	13.6
SRR17241504	PRJNA788462	Pig Feces	USA	North America	19.4
SRR17241507	PRJNA788462	Pig Feces	USA	North America	19.4
SRR17241509	PRJNA788462	Pig Feces	USA	North America	10.1
ERR1135285	PRJEB11755	Pig Feces	Denmark	Europe	8.2
ERR1135286	PRJEB11755	Pig Feces	Denmark	Europe	9
ERR1135288	PRJEB11755	Pig Feces	Denmark	Europe	8.4
ERR1135290	PRJEB11755	Pig Feces	Denmark	Europe	8
ERR1135291	PRJEB11755	Pig Feces	Denmark	Europe	8.2
ERR1135308	PRJEB11755	Pig Feces	Denmark	Europe	8.6
ERR1135309	PRJEB11755	Pig Feces	Denmark	Europe	7.9
ERR1135310	PRJEB11755	Pig Feces	Denmark	Europe	8.8
ERR1135311	PRJEB11755	Pig Feces	Denmark	Europe	7.9
ERR1135315	PRJEB11755	Pig Feces	Denmark	Europe	8
ERR1135318	PRJEB11755	Pig Feces	Denmark	Europe	7.9
ERR1135327	PRJEB11755	Pig Feces	Denmark	Europe	7.9
ERR1135334	PRJEB11755	Pig Feces	Denmark	Europe	8.8
ERR1135337	PRJEB11755	Pig Feces	Denmark	Europe	8.3
ERR1135340	PRJEB11755	Pig Feces	Denmark	Europe	8
ERR1135345	PRJEB11755	Pig Feces	Denmark	Europe	8
ERR1135353	PRJEB11755	Pig Feces	Denmark	Europe	9.1
ERR1135364	PRJEB11755	Pig Feces	Denmark	Europe	8
ERR2241627	PRJEB22062	Pig Feces	Netherlands	Europe	11.1
ERR2241629	PRJEB22062	Pig Feces	Netherlands	Europe	10.4
ERR2241630	PRJEB22062	Pig Feces	Netherlands	Europe	12.3
ERR2241633	PRJEB22062	Pig Feces	Netherlands	Europe	15.3
ERR2241636	PRJEB22062	Pig Feces	Netherlands	Europe	10.2
ERR2241638	PRJEB22062	Pig Feces	Netherlands	Europe	10.3
ERR2241640	PRJEB22062	Pig Feces	Netherlands	Europe	17.2
ERR2241642	PRJEB22062	Pig Feces	Netherlands	Europe	12.2
ERR2241644	PRJEB22062	Pig Feces	Netherlands	Europe	16.4
ERR2241646	PRJEB22062	Pig Feces	Netherlands	Europe	13
ERR2241648	PRJEB22062	Pig Feces	Netherlands	Europe	12.6
ERR2241650	PRJEB22062	Pig Feces	Netherlands	Europe	10.3
ERR2241652	PRJEB22062	Pig Feces	Netherlands	Europe	11.8
ERR2241654	PRJEB22062	Pig Feces	Netherlands	Europe	16.5
ERR2241656	PRJEB22062	Pig Feces	Netherlands	Europe	15.4
ERR2241658	PRJEB22062	Pig Feces	Netherlands	Europe	19.4
ERR2241660	PRJEB22062	Pig Feces	Netherlands	Europe	10.5
ERR2241663	PRJEB22062	Pig Feces	Netherlands	Europe	12.9
ERR2241666	PRJEB22062	Pig Feces	Germany	Europe	10.2
ERR2241667	PRJEB22062	Pig Feces	Germany	Europe	12.3
ERR2241669	PRJEB22062	Pig Feces	Germany	Europe	19.5
ERR2241672	PRJEB22062	Pig Feces	Germany	Europe	18.4
ERR2241673	PRJEB22062	Pig Feces	Germany	Europe	14.3
ERR2241675	PRJEB22062	Pig Feces	Germany	Europe	10.6
ERR2241676	PRJEB22062	Pig Feces	Germany	Europe	13.9
ERR2241677	PRJEB22062	Pig Feces	Germany	Europe	10.1
ERR2241680	PRJEB22062	Pig Feces	Germany	Europe	11
ERR2241683	PRJEB22062	Pig Feces	Germany	Europe	14.1
ERR2241684	PRJEB22062	Pig Feces	Germany	Europe	12.1
ERR2241705	PRJEB22062	Pig Feces	France	Europe	13.9
ERR2241707	PRJEB22062	Pig Feces	France	Europe	10.2
ERR2241708	PRJEB22062	Pig Feces	France	Europe	16.1
ERR2241710	PRJEB22062	Pig Feces	France	Europe	12.1
ERR2241711	PRJEB22062	Pig Feces	France	Europe	10.3
ERR2241712	PRJEB22062	Pig Feces	France	Europe	15.7
ERR2241716	PRJEB22062	Pig Feces	France	Europe	10.5
ERR2241717	PRJEB22062	Pig Feces	France	Europe	10.5
ERR2241719	PRJEB22062	Pig Feces	France	Europe	10.8
ERR2241720	PRJEB22062	Pig Feces	France	Europe	12.7
ERR2241721	PRJEB22062	Pig Feces	France	Europe	15.9
ERR2241722	PRJEB22062	Pig Feces	France	Europe	12
ERR2241723	PRJEB22062	Pig Feces	France	Europe	16.2
ERR2241724	PRJEB22062	Pig Feces	France	Europe	13.8
ERR2241745	PRJEB22062	Pig Feces	Spain	Europe	17.3
ERR2241746	PRJEB22062	Pig Feces	Spain	Europe	12
ERR2241751	PRJEB22062	Pig Feces	Spain	Europe	11
ERR2241757	PRJEB22062	Pig Feces	Spain	Europe	11.3
ERR2241767	PRJEB22062	Pig Feces	Spain	Europe	16.1
ERR2241768	PRJEB22062	Pig Feces	Spain	Europe	13.5
ERR2241769	PRJEB22062	Pig Feces	Spain	Europe	18.3
ERR2245465	PRJEB22062	Pig Feces	Belgium	Europe	13.8
ERR2245466	PRJEB22062	Pig Feces	Belgium	Europe	13.9
ERR2245467	PRJEB22062	Pig Feces	Belgium	Europe	10.2
ERR2245475	PRJEB22062	Pig Feces	Italy	Europe	15.9
ERR2245476	PRJEB22062	Pig Feces	Italy	Europe	11.6
ERR2245477	PRJEB22062	Pig Feces	Italy	Europe	14.8
ERR2245481	PRJEB22062	Pig Feces	Poland	Europe	14.2
ERR2245482	PRJEB22062	Pig Feces	Poland	Europe	15.6
ERR2245483	PRJEB22062	Pig Feces	Poland	Europe	12.2
ERR1713353	PRJEB13831	Wastewater Influent	Ecuador	South America	5
ERR2592265	PRJEB13831	Wastewater Influent	Nigeria	Africa	5
ERR1725985	PRJEB13831	Wastewater Influent	Kenya	Africa	5.1
ERR1725947	PRJEB13831	Wastewater Influent	Bulgaria	Europe	5.1
ERR1726013	PRJEB13831	Wastewater Influent	USA	North America	5.1
ERR1726016	PRJEB13831	Wastewater Influent	USA	North America	5.1
ERR2592273	PRJEB13831	Wastewater Influent	Turkey	Asia	5.2
ERR1725974	PRJEB13831	Wastewater Influent	Georgia	Asia	5.2
ERR1713354	PRJEB13831	Wastewater Influent	Spain	Europe	5.2
ERR1713341	PRJEB13831	Wastewater Influent	Canada	North America	5.4
ERR2592269	PRJEB13831	Wastewater Influent	Singapore	Asia	5.4
ERR2592248	PRJEB13831	Wastewater Influent	Brazil	South America	5.5
ERR2592337	PRJEB13831	Wastewater Influent	Malaysia	Asia	5.6
ERR1713399	PRJEB13831	Wastewater Influent	USA	North America	5.7
ERR2592245	PRJEB13831	Wastewater Influent	Australia	Oceania	5.8
ERR2592282	PRJEB13831	Wastewater Influent	Zambia	Africa	5.8
ERR1713411	PRJEB13831	Wastewater Influent	Zambia	Africa	5.8
ERR2592246	PRJEB13831	Wastewater Influent	Austria	Europe	6.1
ERR2592328	PRJEB13831	Wastewater Influent	Australia	Oceania	6.1
ERR2592274	PRJEB13831	Wastewater Influent	USA	North America	6.1
ERR1713338	PRJEB13831	Wastewater Influent	Botswana	Africa	6.2
ERR2592277	PRJEB13831	Wastewater Influent	USA	North America	6.3
ERR2592249	PRJEB13831	Wastewater Influent	Botswana	Africa	6.4
ERR2592268	PRJEB13831	Wastewater Influent	Poland	Europe	6.4
ERR2592279	PRJEB13831	Wastewater Influent	USA	North America	6.4
ERR2592256	PRJEB13831	Wastewater Influent	Georgia	Asia	6.5
ERR1713334	PRJEB13831	Wastewater Influent	Austria	Europe	6.6
ERR1713375	PRJEB13831	Wastewater Influent	Macedonia	Europe	6.6
ERR1713409	PRJEB13831	Wastewater Influent	South Africa	Africa	6.6
ERR1726005	PRJEB13831	Wastewater Influent	Sweden	Europe	6.7
ERR1713402	PRJEB13831	Wastewater Influent	USA	North America	6.7
ERR2592255	PRJEB13831	Wastewater Influent	Finland	Europe	6.7
ERR1725979	PRJEB13831	Wastewater Influent	Ireland	Europe	6.8
ERR1713387	PRJEB13831	Wastewater Influent	Singapore	Asia	6.8
ERR1713365	PRJEB13831	Wastewater Influent	Iceland	Europe	6.8
ERR1713356	PRJEB13831	Wastewater Influent	Finland	Europe	6.8
ERR2592247	PRJEB13831	Wastewater Influent	Bulgaria	Europe	6.9
ERR1713336	PRJEB13831	Wastewater Influent	Brazil	South America	7
ERR2592264	PRJEB13831	Wastewater Influent	Malaysia	Asia	7
ERR1713398	PRJEB13831	Wastewater Influent	USA	North America	7.1
ERR2592263	PRJEB13831	Wastewater Influent	Macedonia	Europe	7.2
ERR2592278	PRJEB13831	Wastewater Influent	USA	North America	7.2
ERR2592260	PRJEB13831	Wastewater Influent	Iceland	Europe	7.2
ERR1713378	PRJEB13831	Wastewater Influent	Nigeria	Africa	7.2
ERR1713364	PRJEB13831	Wastewater Influent	Iran	Asia	7.3
ERR2592332	PRJEB13831	Wastewater Influent	Germany	Europe	7.4
ERR2592244	PRJEB13831	Wastewater Influent	Albania	Europe	7.4
ERR1725998	PRJEB13831	Wastewater Influent	Netherlands	Europe	7.5
ERR1725997	PRJEB13831	Wastewater Influent	Netherlands	Europe	7.5
ERR1713357	PRJEB13831	Wastewater Influent	Georgia	Asia	7.6
ERR2592267	PRJEB13831	Wastewater Influent	Norway	Europe	7.6
ERR2592259	PRJEB13831	Wastewater Influent	Iran	Asia	7.6
ERR1725988	PRJEB13831	Wastewater Influent	Moldova	Europe	7.6
ERR1725992	PRJEB13831	Wastewater Influent	Malta	Europe	7.6
ERR2592258	PRJEB13831	Wastewater Influent	India	Asia	7.7
ERR2592253	PRJEB13831	Wastewater Influent	Czech Republic	Europe	7.7
ERR1713376	PRJEB13831	Wastewater Influent	Malta	Europe	7.7
ERR1713335	PRJEB13831	Wastewater Influent	Bulgaria	Europe	7.7
ERR1713389	PRJEB13831	Wastewater Influent	Slovakia	Europe	7.8
ERR1713401	PRJEB13831	Wastewater Influent	USA	North America	7.9
ERR1713388	PRJEB13831	Wastewater Influent	Serbia	Europe	8
ERR2592280	PRJEB13831	Wastewater Influent	USA	North America	8.1
ERR1713374	PRJEB13831	Wastewater Influent	Moldova	Europe	8.2
ERR1713383	PRJEB13831	Wastewater Influent	Poland	Europe	8.2
ERR1713410	PRJEB13831	Wastewater Influent	Zambia	Africa	8.2
ERR1713351	PRJEB13831	Wastewater Influent	Denmark	Europe	8.4
ERR1713400	PRJEB13831	Wastewater Influent	USA	North America	8.4
ERR2592252	PRJEB13831	Wastewater Influent	Ivory Coast	Africa	8.4
ERR1713345	PRJEB13831	Wastewater Influent	Ivory Coast	Africa	9.2
ERR2592266	PRJEB13831	Wastewater Influent	Netherlands	Europe	9.3
ERR2592334	PRJEB13831	Wastewater Influent	Spain	Europe	9.3
ERR1725970	PRJEB13831	Wastewater Influent	Spain	Europe	9.3
ERR1713380	PRJEB13831	Wastewater Influent	Norway	Europe	9.7
ERR1725969	PRJEB13831	Wastewater Influent	Spain	Europe	10
ERR1713385	PRJEB13831	Wastewater Influent	Peru	South America	10.1
ERR1725950	PRJEB13831	Wastewater Influent	Brazil	South America	10.7
ERR1725942	PRJEB13831	Wastewater Influent	Australia	Oceania	10.8
ERR1713392	PRJEB13831	Wastewater Influent	Sweden	Europe	11
ERR1713363	PRJEB13831	Wastewater Influent	Ireland	Europe	11
ERR2592342	PRJEB13831	Wastewater Influent	USA	North America	11.2
ERR1713347	PRJEB13831	Wastewater Influent	Czech Republic	Europe	11.5
ERR1726033	PRJEB13831	Wastewater Influent	Zambia	Africa	11.5
ERR1713369	PRJEB13831	Wastewater Influent	Kenya	Africa	11.6
ERR1713362	PRJEB13831	Wastewater Influent	India	Asia	12.1
ERR1713395	PRJEB13831	Wastewater Influent	Turkey	Asia	12.1
ERR1713337	PRJEB13831	Wastewater Influent	Brazil	South America	12.2
ERR1713370	PRJEB13831	Wastewater Influent	Cambodia	Asia	12.6
ERR1713390	PRJEB13831	Wastewater Influent	Slovenia	Europe	12.6
ERR1713408	PRJEB13831	Wastewater Influent	Croatia	Europe	12.9
ERR2592343	PRJEB13831	Wastewater Influent	Zambia	Africa	13
ERR1713397	PRJEB13831	Wastewater Influent	USA	North America	13.5
ERR1713342	PRJEB13831	Wastewater Influent	Canada	North America	13.6
ERR1713406	PRJEB13831	Wastewater Influent	USA	North America	13.8
ERR1713359	PRJEB13831	Wastewater Influent	Gambia	Africa	13.8
ERR1713372	PRJEB13831	Wastewater Influent	Luxembourg	Europe	14.1
ERR2592338	PRJEB13831	Wastewater Influent	Netherlands	Europe	14.5
ERR1713381	PRJEB13831	Wastewater Influent	Nepal	Asia	14.6
ERR1713368	PRJEB13831	Wastewater Influent	Kazakhstan	Asia	14.8
ERR1713391	PRJEB13831	Wastewater Influent	Sweden	Europe	15
ERR2592329	PRJEB13831	Wastewater Influent	Canada	North America	15.1
ERR1713358	PRJEB13831	Wastewater Influent	Ghana	Africa	15.1
ERR1713344	PRJEB13831	Wastewater Influent	China	Asia	15.8
ERR1713349	PRJEB13831	Wastewater Influent	Denmark	Europe	15.9
ERR1713384	PRJEB13831	Wastewater Influent	Pakistan	Asia	16.1
ERR1713355	PRJEB13831	Wastewater Influent	Ethiopia	Africa	16.2
ERR1713396	PRJEB13831	Wastewater Influent	Tanzania	Africa	17.4
ERR1713371	PRJEB13831	Wastewater Influent	Sri Lanka	Asia	17.6
ERR1713350	PRJEB13831	Wastewater Influent	Denmark	Europe	18
ERR1713367	PRJEB13831	Wastewater Influent	Italy	Europe	18.3
ERR2592283	PRJEB13831	Wastewater Influent	Zambia	Africa	18.4
ERR1713407	PRJEB13831	Wastewater Influent	Viet Nam	Asia	18.8
ERR1713405	PRJEB13831	Wastewater Influent	USA	North America	19.4
ERR1713386	PRJEB13831	Wastewater Influent	Senegal	Africa	19.5
ERR1713382	PRJEB13831	Wastewater Influent	New Zealand	Oceania	20.8
ERR1713394	PRJEB13831	Wastewater Influent	Togo	Africa	24.8
ERR2592250	PRJEB13831	Wastewater Influent	Canada	North America	28.6
SRR14932633	PRJNA509305	Activated Sludge	USA	North America	8.1
SRR14932675	PRJNA509305	Activated Sludge	Colombia	South America	8.4
SRR14932484	PRJNA509305	Activated Sludge	South Africa	Africa	8.6
SRR14932601	PRJNA509305	Activated Sludge	USA	North America	8.9
SRR14932602	PRJNA509305	Activated Sludge	USA	North America	9.1
SRR14932477	PRJNA509305	Activated Sludge	China	Asia	9.2
SRR14932669	PRJNA509305	Activated Sludge	China	Asia	9.3
SRR14932671	PRJNA509305	Activated Sludge	China	Asia	9.6
SRR14932695	PRJNA509305	Activated Sludge	China	Asia	9.7
SRR14932520	PRJNA509305	Activated Sludge	USA	North America	9.8
SRR14932541	PRJNA509305	Activated Sludge	USA	North America	9.8
SRR14932478	PRJNA509305	Activated Sludge	China	Asia	9.8
SRR14932483	PRJNA509305	Activated Sludge	China	Asia	9.9
SRR14932580	PRJNA509305	Activated Sludge	USA	North America	9.9
SRR14932661	PRJNA509305	Activated Sludge	China	Asia	9.9
SRR14932571	PRJNA509305	Activated Sludge	USA	North America	9.9
SRR14932702	PRJNA509305	Activated Sludge	China	Asia	9.9
SRR14932545	PRJNA509305	Activated Sludge	USA	North America	9.9
SRR14932684	PRJNA509305	Activated Sludge	Germany	Europe	10
SRR14932532	PRJNA509305	Activated Sludge	USA	North America	10
SRR14932682	PRJNA509305	Activated Sludge	Italy	Europe	10
SRR14932576	PRJNA509305	Activated Sludge	USA	North America	10
SRR14932543	PRJNA509305	Activated Sludge	USA	North America	10
SRR14932679	PRJNA509305	Activated Sludge	Italy	Europe	10
SRR14932628	PRJNA509305	Activated Sludge	Chile	South America	10
SRR14932572	PRJNA509305	Activated Sludge	USA	North America	10
SRR14932589	PRJNA509305	Activated Sludge	USA	North America	10
SRR14932574	PRJNA509305	Activated Sludge	USA	North America	10
SRR14932584	PRJNA509305	Activated Sludge	USA	North America	10
SRR14932663	PRJNA509305	Activated Sludge	China	Asia	10.1
SRR14932630	PRJNA509305	Activated Sludge	USA	North America	10.1
SRR14932635	PRJNA509305	Activated Sludge	Australia	Oceania	10.2
SRR14932673	PRJNA509305	Activated Sludge	China	Asia	10.2
SRR14932644	PRJNA509305	Activated Sludge	China	Asia	10.2
SRR14932656	PRJNA509305	Activated Sludge	China	Asia	10.2
SRR14932551	PRJNA509305	Activated Sludge	USA	North America	10.2
SRR14932575	PRJNA509305	Activated Sludge	USA	North America	10.2
SRR14932699	PRJNA509305	Activated Sludge	China	Asia	10.2
SRR14932685	PRJNA509305	Activated Sludge	Germany	Europe	10.3
SRR14932598	PRJNA509305	Activated Sludge	USA	North America	10.3
SRR14932561	PRJNA509305	Activated Sludge	USA	North America	10.3
SRR14932490	PRJNA509305	Activated Sludge	China	Asia	10.3
SRR14932531	PRJNA509305	Activated Sludge	USA	North America	10.3
SRR14932700	PRJNA509305	Activated Sludge	China	Asia	10.3
SRR14932538	PRJNA509305	Activated Sludge	USA	North America	10.3
SRR14932670	PRJNA509305	Activated Sludge	China	Asia	10.3
SRR14932617	PRJNA509305	Activated Sludge	Canada	North America	10.4
SRR14932629	PRJNA509305	Activated Sludge	China	Asia	10.4
SRR14932525	PRJNA509305	Activated Sludge	USA	North America	10.4
SRR14932624	PRJNA509305	Activated Sludge	Chile	South America	10.4
SRR14932579	PRJNA509305	Activated Sludge	USA	North America	10.4
SRR14932542	PRJNA509305	Activated Sludge	USA	North America	10.4
SRR14932659	PRJNA509305	Activated Sludge	China	Asia	10.4
SRR14932488	PRJNA509305	Activated Sludge	China	Asia	10.4
SRR14932634	PRJNA509305	Activated Sludge	USA	North America	10.4
SRR14932697	PRJNA509305	Activated Sludge	China	Asia	10.5
SRR14932616	PRJNA509305	Activated Sludge	Canada	North America	10.5
SRR14932686	PRJNA509305	Activated Sludge	Germany	Europe	10.5
SRR14932560	PRJNA509305	Activated Sludge	USA	North America	10.5
SRR14932677	PRJNA509305	Activated Sludge	Germany	Europe	10.5
SRR14932501	PRJNA509305	Activated Sludge	USA	North America	10.5
SRR14932521	PRJNA509305	Activated Sludge	USA	North America	10.6
SRR14932600	PRJNA509305	Activated Sludge	USA	North America	10.6
SRR14932582	PRJNA509305	Activated Sludge	China	Asia	10.6
SRR14932693	PRJNA509305	Activated Sludge	China	Asia	10.6
SRR14932607	PRJNA509305	Activated Sludge	USA	North America	10.6
SRR14932662	PRJNA509305	Activated Sludge	China	Asia	10.6
SRR14932547	PRJNA509305	Activated Sludge	USA	North America	10.7
SRR14932548	PRJNA509305	Activated Sludge	USA	North America	10.7
SRR14932626	PRJNA509305	Activated Sludge	Chile	South America	10.7
SRR14932539	PRJNA509305	Activated Sludge	USA	North America	10.7
SRR14932540	PRJNA509305	Activated Sludge	USA	North America	10.7
SRR14932482	PRJNA509305	Activated Sludge	South Africa	Africa	10.7
SRR14932645	PRJNA509305	Activated Sludge	China	Asia	10.8
SRR14932567	PRJNA509305	Activated Sludge	USA	North America	10.8
SRR14932595	PRJNA509305	Activated Sludge	USA	North America	10.8
SRR14932660	PRJNA509305	Activated Sludge	China	Asia	10.8
SRR14932664	PRJNA509305	Activated Sludge	China	Asia	10.9
SRR14932681	PRJNA509305	Activated Sludge	Italy	Europe	10.9
SRR14932512	PRJNA509305	Activated Sludge	Australia	Oceania	10.9
SRR14932568	PRJNA509305	Activated Sludge	USA	North America	10.9
SRR14932479	PRJNA509305	Activated Sludge	China	Asia	10.9
SRR14932549	PRJNA509305	Activated Sludge	USA	North America	10.9
SRR14932597	PRJNA509305	Activated Sludge	USA	North America	11
SRR14932604	PRJNA509305	Activated Sludge	Brazil	South America	11
SRR14932544	PRJNA509305	Activated Sludge	USA	North America	11
SRR14932515	PRJNA509305	Activated Sludge	Taiwan	Asia	11
SRR14932678	PRJNA509305	Activated Sludge	Italy	Europe	11
SRR14932524	PRJNA509305	Activated Sludge	USA	North America	11.1
SRR14932546	PRJNA509305	Activated Sludge	USA	North America	11.1
SRR14932500	PRJNA509305	Activated Sludge	USA	North America	11.1
SRR14932646	PRJNA509305	Activated Sludge	China	Asia	11.1
SRR14932550	PRJNA509305	Activated Sludge	USA	North America	11.1
SRR14932680	PRJNA509305	Activated Sludge	Italy	Europe	11.1
SRR14932518	PRJNA509305	Activated Sludge	USA	North America	11.1
SRR14932666	PRJNA509305	Activated Sludge	China	Asia	11.1
SRR14932687	PRJNA509305	Activated Sludge	China	Asia	11.2
SRR14932517	PRJNA509305	Activated Sludge	USA	North America	11.2
SRR14932577	PRJNA509305	Activated Sludge	USA	North America	11.2
SRR14932619	PRJNA509305	Activated Sludge	Canada	North America	11.2
SRR14932556	PRJNA509305	Activated Sludge	USA	North America	11.3
SRR14932530	PRJNA509305	Activated Sludge	USA	North America	11.3
SRR14932558	PRJNA509305	Activated Sludge	USA	North America	11.3
SRR14932585	PRJNA509305	Activated Sludge	USA	North America	11.3
SRR14932632	PRJNA509305	Activated Sludge	USA	North America	11.3
SRR14932505	PRJNA509305	Activated Sludge	Sweden	Europe	11.3
SRR14932503	PRJNA509305	Activated Sludge	Sweden	Europe	11.3
SRR14932502	PRJNA509305	Activated Sludge	Australia	Oceania	11.3
SRR14932668	PRJNA509305	Activated Sludge	China	Asia	11.3
ERR3503282	PRJEB13833	Surface Water	Kenya	Africa	7.5
SRR5306410	PRJNA377521	Surface Water	Spain	Europe	7.6
SRR5306407	PRJNA377521	Surface Water	Spain	Europe	7.7
ERR1414266	PRJEB14051	Surface Water	Sweden	Europe	7.8
ERR3503310	PRJEB13833	Surface Water	Kenya	Africa	7.9
SRR5306404	PRJNA377521	Surface Water	Spain	Europe	8
ERR3503278	PRJEB13833	Surface Water	Kenya	Africa	8.3
ERR3503316	PRJEB13833	Surface Water	Kenya	Africa	8.4
ERR1713346	PRJEB13831	Surface Water	Colombia	South America	8.5
SRR11567538	PRJNA626373	Surface Water	Puerto Rico	North America	8.6
SRR11567522	PRJNA626373	Surface Water	Puerto Rico	North America	8.6
ERR3503292	PRJEB13833	Surface Water	Kenya	Africa	8.7
ERR3503283	PRJEB13833	Surface Water	Kenya	Africa	8.8
ERR3503313	PRJEB13833	Surface Water	Kenya	Africa	9
SRR8164872	PRJNA473136	Surface Water	USA	North America	9.1
SRR9030912	PRJNA529711	Surface Water	Canada	North America	9.2
ERR3503291	PRJEB13833	Surface Water	Kenya	Africa	9.2
ERR3503301	PRJEB13833	Surface Water	Kenya	Africa	9.4
ERR3503279	PRJEB13833	Surface Water	Kenya	Africa	9.4
SRR9030909	PRJNA529711	Surface Water	Canada	North America	9.5
SRR11567541	PRJNA626373	Surface Water	Puerto Rico	North America	9.8
SRR9030908	PRJNA529711	Surface Water	Canada	North America	9.8
SRR5306409	PRJNA377521	Surface Water	Spain	Europe	9.8
ERR3503289	PRJEB13833	Surface Water	Kenya	Africa	9.9
SRR9030902	PRJNA529711	Surface Water	Canada	North America	10.2
SRR9030910	PRJNA529711	Surface Water	Canada	North America	10.3
SRR6262245	PRJNA416667	Surface Water	China	Asia	10.4
SRR6262238	PRJNA416667	Surface Water	China	Asia	10.4
SRR10492803	PRJNA589661	Surface Water	China	Asia	10.5
SRR6262242	PRJNA416667	Surface Water	China	Asia	10.5
SRR6262246	PRJNA416667	Surface Water	China	Asia	10.5
SRR11567540	PRJNA626373	Surface Water	Puerto Rico	North America	10.5
SRR10036087	PRJNA562643	Surface Water	USA	North America	10.7
SRR6262243	PRJNA416667	Surface Water	China	Asia	10.7
SRR10036035	PRJNA562643	Surface Water	USA	North America	10.7
SRR6262236	PRJNA416667	Surface Water	China	Asia	10.7
SRR9030904	PRJNA529711	Surface Water	Canada	North America	10.7
SRR6262237	PRJNA416667	Surface Water	China	Asia	10.8
SRR6262240	PRJNA416667	Surface Water	China	Asia	10.8
SRR11567532	PRJNA626373	Surface Water	Puerto Rico	North America	10.8
SRR6262241	PRJNA416667	Surface Water	China	Asia	10.8
SRR6262235	PRJNA416667	Surface Water	China	Asia	10.9
ERR3503311	PRJEB13833	Surface Water	Kenya	Africa	10.9
SRR9030911	PRJNA529711	Surface Water	Canada	North America	10.9
SRR9030907	PRJNA529711	Surface Water	Canada	North America	10.9
SRR10036053	PRJNA562643	Surface Water	USA	North America	11
SRR10492802	PRJNA589661	Surface Water	China	Asia	11
SRR10036085	PRJNA562643	Surface Water	USA	North America	11.1
SRR10036070	PRJNA562643	Surface Water	USA	North America	11.1
SRR9030905	PRJNA529711	Surface Water	Canada	North America	11.3
SRR9030901	PRJNA529711	Surface Water	Canada	North America	11.3
SRR6262239	PRJNA416667	Surface Water	China	Asia	11.3
SRR9030900	PRJNA529711	Surface Water	Canada	North America	11.3
SRR6262244	PRJNA416667	Surface Water	China	Asia	11.3
SRR9030903	PRJNA529711	Surface Water	Canada	North America	11.4
SRR11567542	PRJNA626373	Surface Water	Puerto Rico	North America	11.7
SRR10036075	PRJNA562643	Surface Water	USA	North America	11.8
SRR11567529	PRJNA626373	Surface Water	Puerto Rico	North America	11.8
ERR3503314	PRJEB13833	Surface Water	Kenya	Africa	11.9
SRR11567536	PRJNA626373	Surface Water	Puerto Rico	North America	11.9
SRR9030906	PRJNA529711	Surface Water	Canada	North America	12
SRR11567523	PRJNA626373	Surface Water	Puerto Rico	North America	12.2
SRR8164873	PRJNA473136	Surface Water	USA	North America	12.2
ERR1713331	PRJEB13831	Surface Water	Albania	Europe	12.2
SRR11567520	PRJNA626373	Surface Water	Puerto Rico	North America	12.3
SRR10036022	PRJNA562643	Surface Water	USA	North America	12.3
SRR11567524	PRJNA626373	Surface Water	Puerto Rico	North America	12.4
SRR11567531	PRJNA626373	Surface Water	Puerto Rico	North America	12.4
SRR10036041	PRJNA562643	Surface Water	USA	North America	12.6
SRR10036050	PRJNA562643	Surface Water	USA	North America	12.8
ERR1193294	PRJEB12083	Surface Water	United Kindgom	Europe	12.8
SRR11567534	PRJNA626373	Surface Water	Puerto Rico	North America	13.1
SRR11567535	PRJNA626373	Surface Water	Puerto Rico	North America	13.1
SRR11567525	PRJNA626373	Surface Water	Puerto Rico	North America	13.3
SRR8942316	PRJNA530373	Surface Water	South Korea	Asia	13.4
SRR10036052	PRJNA562643	Surface Water	USA	North America	13.4
SRR10036047	PRJNA562643	Surface Water	USA	North America	13.4
SRR11567533	PRJNA626373	Surface Water	Puerto Rico	North America	13.5
SRR8942258	PRJNA530373	Surface Water	South Korea	Asia	14
SRR10036033	PRJNA562643	Surface Water	USA	North America	14.3
SRR10036031	PRJNA562643	Surface Water	USA	North America	14.3
SRR10036077	PRJNA562643	Surface Water	USA	North America	14.6
SRR10036058	PRJNA562643	Surface Water	USA	North America	14.8
SRR8942242	PRJNA530373	Surface Water	South Korea	Asia	14.9
ERR3503303	PRJEB13833	Surface Water	Kenya	Africa	14.9
SRR10036043	PRJNA562643	Surface Water	USA	North America	14.9
ERR1193293	PRJEB12083	Surface Water	United Kindgom	Europe	15.1
SRR8942257	PRJNA530373	Surface Water	South Korea	Asia	15.3
SRR10036044	PRJNA562643	Surface Water	USA	North America	15.3
SRR10036069	PRJNA562643	Surface Water	USA	North America	15.3
ERR3503293	PRJEB13833	Surface Water	Kenya	Africa	15.3
SRR10036076	PRJNA562643	Surface Water	USA	North America	15.4
SRR10036066	PRJNA562643	Surface Water	USA	North America	15.5
SRR8942310	PRJNA530373	Surface Water	South Korea	Asia	15.7
SRR10036088	PRJNA562643	Surface Water	USA	North America	15.7
ERR1193289	PRJEB12083	Surface Water	United Kindgom	Europe	15.8
SRR10036074	PRJNA562643	Surface Water	USA	North America	15.8
SRR10036029	PRJNA562643	Surface Water	USA	North America	15.8
ERR3503300	PRJEB13833	Surface Water	Kenya	Africa	15.9
SRR10036045	PRJNA562643	Surface Water	USA	North America	16.1
SRR10036040	PRJNA562643	Surface Water	USA	North America	16.2
SRR10036063	PRJNA562643	Surface Water	USA	North America	16.3
SRR12685664	PRJNA473136	Surface Water	USA	North America	16.4
SRR10036039	PRJNA562643	Surface Water	USA	North America	16.4
SRR10036046	PRJNA562643	Surface Water	USA	North America	16.6
SRR8942304	PRJNA530373	Surface Water	South Korea	Asia	16.6
SRR8942249	PRJNA530373	Surface Water	South Korea	Asia	16.6
SRR10036084	PRJNA562643	Surface Water	USA	North America	16.8
ERR3503280	PRJEB13833	Surface Water	Kenya	Africa	16.9
ERR3503306	PRJEB13833	Surface Water	Kenya	Africa	16.9
SRR10036042	PRJNA562643	Surface Water	USA	North America	17
SRR10036080	PRJNA562643	Surface Water	USA	North America	17
SRR12685661	PRJNA473136	Surface Water	USA	North America	17
SRR8942265	PRJNA530373	Surface Water	South Korea	Asia	17.1
SRR12685665	PRJNA473136	Surface Water	USA	North America	17.1
SRR10036086	PRJNA562643	Surface Water	USA	North America	17.1
SRR8571170	PRJNA473136	Surface Water	USA	North America	17.2
ERR3503296	PRJEB13833	Surface Water	Kenya	Africa	17.2
SRR10036019	PRJNA562643	Surface Water	USA	North America	17.5
SRR10036067	PRJNA562643	Surface Water	USA	North America	17.6
SRR8942254	PRJNA530373	Surface Water	South Korea	Asia	17.6
SRR10036089	PRJNA562643	Surface Water	USA	North America	17.7
SRR8942250	PRJNA530373	Surface Water	South Korea	Asia	17.7
SRR8571165	PRJNA473136	Surface Water	USA	North America	17.8
SRR10036057	PRJNA562643	Surface Water	USA	North America	17.9
SRR10036055	PRJNA562643	Surface Water	USA	North America	17.9
SRR8942248	PRJNA530373	Surface Water	South Korea	Asia	18
SRR10036056	PRJNA562643	Surface Water	USA	North America	18
SRR12685673	PRJNA473136	Surface Water	USA	North America	18.1
SRR10036049	PRJNA562643	Surface Water	USA	North America	18.1
SRR8942251	PRJNA530373	Surface Water	South Korea	Asia	18.1
SRR8571164	PRJNA473136	Surface Water	USA	North America	18.1
SRR10036024	PRJNA562643	Surface Water	USA	North America	18.1
SRR10036051	PRJNA562643	Surface Water	USA	North America	18.1
SRR8942311	PRJNA530373	Surface Water	South Korea	Asia	18.2
SRR10036028	PRJNA562643	Surface Water	USA	North America	18.2
SRR8942315	PRJNA530373	Surface Water	South Korea	Asia	18.2
SRR8942298	PRJNA530373	Surface Water	South Korea	Asia	18.4
SRR12685662	PRJNA473136	Surface Water	USA	North America	18.4
ERR1193298	PRJEB12083	Surface Water	United Kindgom	Europe	18.4
SRR8942247	PRJNA530373	Surface Water	South Korea	Asia	18.5
SRR8942303	PRJNA530373	Surface Water	South Korea	Asia	18.6
SRR10036038	PRJNA562643	Surface Water	USA	North America	18.6
SRR8942256	PRJNA530373	Surface Water	South Korea	Asia	18.9
SRR8942301	PRJNA530373	Surface Water	South Korea	Asia	19.1
SRR10036021	PRJNA562643	Surface Water	USA	North America	19.2
SRR10036061	PRJNA562643	Surface Water	USA	North America	19.2
SRR10036060	PRJNA562643	Surface Water	USA	North America	19.2
SRR12685660	PRJNA473136	Surface Water	USA	North America	19.3
SRR12685668	PRJNA473136	Surface Water	USA	North America	19.3
SRR10036048	PRJNA562643	Surface Water	USA	North America	19.4
SRR10036054	PRJNA562643	Surface Water	USA	North America	19.5
SRR12685670	PRJNA473136	Surface Water	USA	North America	19.5
SRR10036025	PRJNA562643	Surface Water	USA	North America	19.5
SRR10036059	PRJNA562643	Surface Water	USA	North America	19.5
SRR12685669	PRJNA473136	Surface Water	USA	North America	19.6
SRR10036026	PRJNA562643	Surface Water	USA	North America	19.7
SRR8942308	PRJNA530373	Surface Water	South Korea	Asia	19.7
SRR8571168	PRJNA473136	Surface Water	USA	North America	19.7
SRR10036072	PRJNA562643	Surface Water	USA	North America	19.8
SRR8942266	PRJNA530373	Surface Water	South Korea	Asia	19.8
ERR3503308	PRJEB13833	Surface Water	Kenya	Africa	19.8
SRR12685663	PRJNA473136	Surface Water	USA	North America	19.9
SRR8571171	PRJNA473136	Surface Water	USA	North America	19.9
SRR8571166	PRJNA473136	Surface Water	USA	North America	19.9
SRR10036079	PRJNA562643	Surface Water	USA	North America	20
SRR6231156	PRJNA415974	Wastewater Effluent	USA	North America	4.2
SRR6231175	PRJNA415974	Wastewater Effluent	USA	North America	4.7
SRR6231146	PRJNA415974	Wastewater Effluent	USA	North America	4.7
SRR6231133	PRJNA415974	Wastewater Effluent	USA	North America	4.7
ERR1414257	PRJEB14051	Wastewater Effluent	Sweden	Europe	4.8
SRR8715496	PRJNA526679	Wastewater Effluent	Israel	Asia	5.1
SRR8715494	PRJNA526679	Wastewater Effluent	Israel	Asia	5.3
SRR6231170	PRJNA415974	Wastewater Effluent	USA	North America	5.4
SRR6231180	PRJNA415974	Wastewater Effluent	USA	North America	5.8
SRR6231211	PRJNA415974	Wastewater Effluent	USA	North America	5.8
SRR6231160	PRJNA415974	Wastewater Effluent	USA	North America	5.9
SRR7877879	PRJNA490743	Wastewater Effluent	USA	North America	6
SRR6231204	PRJNA415974	Wastewater Effluent	USA	North America	6.4
SRR6231147	PRJNA415974	Wastewater Effluent	USA	North America	6.4
SRR7877882	PRJNA490743	Wastewater Effluent	USA	North America	6.5
SRR7877880	PRJNA490743	Wastewater Effluent	USA	North America	6.6
ERR1414265	PRJEB14051	Wastewater Effluent	Sweden	Europe	6.6
SRR7877886	PRJNA490743	Wastewater Effluent	USA	North America	6.7
SRR6231203	PRJNA415974	Wastewater Effluent	USA	North America	6.7
ERR3569147	PRJEB34690	Wastewater Effluent	South Africa	Africa	6.8
SRR7877878	PRJNA490743	Wastewater Effluent	USA	North America	6.8
SRR6231172	PRJNA415974	Wastewater Effluent	USA	North America	6.9
ERR1414259	PRJEB14051	Wastewater Effluent	Sweden	Europe	7.3
SRR6231173	PRJNA415974	Wastewater Effluent	USA	North America	7.5
ERR1414263	PRJEB14051	Wastewater Effluent	Sweden	Europe	7.6
SRR7877883	PRJNA490743	Wastewater Effluent	USA	North America	7.6
SRR6231188	PRJNA415974	Wastewater Effluent	USA	North America	7.7
SRR7877881	PRJNA490743	Wastewater Effluent	USA	North America	7.8
SRR8893622	PRJNA532678	Wastewater Effluent	China	Asia	8.1
ERR1414264	PRJEB14051	Wastewater Effluent	Sweden	Europe	8.5
ERR1414262	PRJEB14051	Wastewater Effluent	Sweden	Europe	8.6
SRR8893620	PRJNA532678	Wastewater Effluent	China	Asia	8.7
SRR8893621	PRJNA532678	Wastewater Effluent	China	Asia	8.7
SRR8893625	PRJNA532678	Wastewater Effluent	China	Asia	8.8
SRR7877885	PRJNA490743	Wastewater Effluent	USA	North America	8.9
ERR1414261	PRJEB14051	Wastewater Effluent	Sweden	Europe	9
ERR1414260	PRJEB14051	Wastewater Effluent	Sweden	Europe	9.3
ERR1414258	PRJEB14051	Wastewater Effluent	Sweden	Europe	9.4
SRR11567528	PRJNA626373	Wastewater Effluent	Puerto Rico	North America	10.5
SRR8893623	PRJNA532678	Wastewater Effluent	China	Asia	10.6
SRR8893624	PRJNA532678	Wastewater Effluent	China	Asia	12.5
SRR8206192	PRJNA505617	Wastewater Effluent	Hong Kong	Asia	13.4
ERR1661353	PRJEB15519	Wastewater Effluent	Saudi Arabia	Asia	13.6
SRR8208349	PRJNA505617	Wastewater Effluent	Hong Kong	Asia	13.7
SRR8208346	PRJNA505617	Wastewater Effluent	Hong Kong	Asia	13.7
SRR6837564	PRJNA438174	Wastewater Effluent	Singapore	Asia	15.9
ERR1661352	PRJEB15519	Wastewater Effluent	Saudi Arabia	Asia	16
SRR6837575	PRJNA438174	Wastewater Effluent	Singapore	Asia	16.2
SRR6837577	PRJNA438174	Wastewater Effluent	Singapore	Asia	16.4
SRR6837566	PRJNA438174	Wastewater Effluent	Singapore	Asia	16.4
SRR6837565	PRJNA438174	Wastewater Effluent	Singapore	Asia	16.4
SRR6837578	PRJNA438174	Wastewater Effluent	Singapore	Asia	16.8
SRR8870486	PRJNA531627	Wastewater Effluent	India	Asia	19.2
SRR6837557	PRJNA438174	Wastewater Effluent	Singapore	Asia	25.6
SRR6837572	PRJNA438174	Wastewater Effluent	Singapore	Asia	25.7
SRR6837556	PRJNA438174	Wastewater Effluent	Singapore	Asia	25.9
SRR6837584	PRJNA438174	Wastewater Effluent	Singapore	Asia	28.6
SRR6837570	PRJNA438174	Wastewater Effluent	Singapore	Asia	30.1
SRR6837571	PRJNA438174	Wastewater Effluent	Singapore	Asia	30.8
SRR8870488	PRJNA531627	Wastewater Effluent	India	Asia	33.2
SRR6837583	PRJNA438174	Wastewater Effluent	Singapore	Asia	35
SRR6837555	PRJNA438174	Wastewater Effluent	Singapore	Asia	35.8
SRR12486999	PRJNA658184	Wastewater Effluent	South Korea	Asia	16.4
SRR12487009	PRJNA658184	Wastewater Effluent	South Korea	Asia	17.7
SRR12486996	PRJNA658184	Wastewater Effluent	South Korea	Asia	16.8
SRR12487018	PRJNA658184	Wastewater Effluent	South Korea	Asia	19.8
SRR12487014	PRJNA658184	Wastewater Effluent	South Korea	Asia	17.1
SRR12487003	PRJNA658184	Wastewater Effluent	South Korea	Asia	19.1
SRR12487022	PRJNA658184	Wastewater Effluent	South Korea	Asia	17.5
SRR12487039	PRJNA658184	Wastewater Effluent	South Korea	Asia	17.3
SRR12487006	PRJNA658184	Wastewater Effluent	South Korea	Asia	17
SRR12487029	PRJNA658184	Wastewater Effluent	South Korea	Asia	16.3
SRR12487032	PRJNA658184	Wastewater Effluent	South Korea	Asia	15.8
SRR12487026	PRJNA658184	Wastewater Effluent	South Korea	Asia	17.5
SRR12487046	PRJNA658184	Wastewater Effluent	South Korea	Asia	17.5
SRR12487013	PRJNA658184	Wastewater Effluent	South Korea	Asia	16.5
SRR12486993	PRJNA658184	Wastewater Effluent	South Korea	Asia	17.3
SRR12487042	PRJNA658184	Wastewater Effluent	South Korea	Asia	17.8
SRR12487036	PRJNA658184	Wastewater Effluent	South Korea	Asia	17.8
SRR22752025	PRJNA904380	Wastewater Effluent	New Zealand	Oceania	11.4
SRR22752041	PRJNA904380	Wastewater Effluent	New Zealand	Oceania	11.2
SRR22752040	PRJNA904380	Wastewater Effluent	New Zealand	Oceania	11.7
SRR22752046	PRJNA904380	Wastewater Effluent	New Zealand	Oceania	10.6
SRR22752039	PRJNA904380	Wastewater Effluent	New Zealand	Oceania	10
SRR22752045	PRJNA904380	Wastewater Effluent	New Zealand	Oceania	11.1
SRR14800548	PRJNA737178	Wastewater Effluent	China	Asia	7.7
SRR17549183	PRJNA796130	Wastewater Effluent	China	Asia	6.7
SRR17549186	PRJNA796130	Wastewater Effluent	China	Asia	7.2
SRR22752014	PRJNA904380	Wastewater Effluent	New Zealand	Oceania	10.3
SRR22752010	PRJNA904380	Wastewater Effluent	New Zealand	Oceania	10.5
SRR22752015	PRJNA904380	Wastewater Effluent	New Zealand	Oceania	11.7
SRR14800551	PRJNA737178	Wastewater Effluent	China	Asia	6.7
SRR14493015	PRJNA728386	Wastewater Effluent	China	Asia	11.9
SRR14800554	PRJNA737178	Wastewater Effluent	China	Asia	7.2
SRR14493010	PRJNA728386	Wastewater Effluent	China	Asia	13
SRR13355620	PRJNA688020	Wastewater Effluent	Cyprus	Europe	5
SRR13355621	PRJNA688020	Wastewater Effluent	Cyprus	Europe	6.3
SRR13612674	PRJNA693629	Wastewater Effluent	Malaysia	Asia	5.3
SRR13612672	PRJNA693629	Wastewater Effluent	Malaysia	Asia	6.7
SRR13355622	PRJNA688020	Wastewater Effluent	Cyprus	Europe	6.5
SRR13612676	PRJNA693629	Wastewater Effluent	Malaysia	Asia	6.5
SRR13612670	PRJNA693629	Wastewater Effluent	Malaysia	Asia	5.7
SRR13612678	PRJNA693629	Wastewater Effluent	Malaysia	Asia	6.5
SRR13503351	PRJNA693982	Wastewater Effluent	China	Asia	7.7
SRR13612680	PRJNA693629	Wastewater Effluent	Malaysia	Asia	7
SRR13503352	PRJNA693982	Wastewater Effluent	China	Asia	11.4
ERR1676588	PRJEB15294	Soil	Canada	North America	10.5
ERR1676591	PRJEB15294	Soil	Canada	North America	11.8
ERR1676592	PRJEB15294	Soil	Canada	North America	10.6
ERR1676593	PRJEB15294	Soil	Canada	North America	10.5
ERR4837091	PRJEB41174	Soil	Greenland	North America	14.2
ERR4837094	PRJEB41174	Soil	Greenland	North America	10.5
ERR4837098	PRJEB41174	Soil	Greenland	North America	10.6
ERR4392702	PRJEB39497	Soil	USA	North America	19.8
ERR4392704	PRJEB39497	Soil	USA	North America	18.5
ERR4392705	PRJEB39497	Soil	USA	North America	13.4
ERR4392707	PRJEB39497	Soil	USA	North America	18.1
ERR4392710	PRJEB39497	Soil	USA	North America	11.1
ERR4392711	PRJEB39497	Soil	USA	North America	14.4
ERR4392712	PRJEB39497	Soil	USA	North America	12.2
ERR4392713	PRJEB39497	Soil	USA	North America	10.3
ERR4392714	PRJEB39497	Soil	USA	North America	16.9
ERR4392715	PRJEB39497	Soil	USA	North America	10.3
ERR4392716	PRJEB39497	Soil	USA	North America	13.2
ERR4392717	PRJEB39497	Soil	USA	North America	14.7
ERR4392718	PRJEB39497	Soil	USA	North America	12.3
ERR4392719	PRJEB39497	Soil	USA	North America	13.4
ERR4392720	PRJEB39497	Soil	USA	North America	11.4
ERR4392721	PRJEB39497	Soil	USA	North America	12.9
ERR4392723	PRJEB39497	Soil	USA	North America	15.4
ERR4392724	PRJEB39497	Soil	USA	North America	10.1
ERR4392725	PRJEB39497	Soil	USA	North America	14.5
ERR4392726	PRJEB39497	Soil	USA	North America	15.8
ERR4392727	PRJEB39497	Soil	USA	North America	12
ERR4392728	PRJEB39497	Soil	USA	North America	18
ERR1762283	PRJEB18675	Soil	Canada	North America	13
ERR1762284	PRJEB18675	Soil	Canada	North America	12.8
ERR1762289	PRJEB18675	Soil	Canada	North America	14
ERR1762299	PRJEB18675	Soil	Canada	North America	10.5
ERR1762321	PRJEB18675	Soil	Canada	North America	10.1
ERR1762347	PRJEB18675	Soil	Canada	North America	10.1
ERR1762353	PRJEB18675	Soil	Canada	North America	12.6
ERR1762354	PRJEB18675	Soil	Canada	North America	12.3
ERR1762290	PRJEB18675	Soil	Canada	North America	13.9
ERR1762300	PRJEB18675	Soil	Canada	North America	10.4
ERR1762301	PRJEB18675	Soil	Canada	North America	10.2
ERR1762302	PRJEB18675	Soil	Canada	North America	10.1
ERR4837129	PRJEB41174	Soil	Sweden	Europe	10.4
ERR4837135	PRJEB41174	Soil	Sweden	Europe	11.2
ERR4837136	PRJEB41174	Soil	Sweden	Europe	10
ERR4837137	PRJEB41174	Soil	Sweden	Europe	11.2
ERR4837145	PRJEB41174	Soil	Sweden	Europe	11.4
ERR3929365	PRJEB36754	Soil	Switzerland	Europe	14.6
ERR3929367	PRJEB36754	Soil	Switzerland	Europe	11.6
ERR3929369	PRJEB36754	Soil	Switzerland	Europe	12
ERR3929370	PRJEB36754	Soil	Switzerland	Europe	12.8
ERR3929371	PRJEB36754	Soil	Switzerland	Europe	14.3
ERR3929373	PRJEB36754	Soil	Switzerland	Europe	16.9
ERR3943989	PRJEB36754	Soil	Switzerland	Europe	12.9
ERR3943991	PRJEB36754	Soil	Switzerland	Europe	10.2
ERR3943992	PRJEB36754	Soil	Switzerland	Europe	10.7
ERR3943993	PRJEB36754	Soil	Switzerland	Europe	10.5
ERR3943994	PRJEB36754	Soil	Switzerland	Europe	11.1
ERR3943995	PRJEB36754	Soil	Switzerland	Europe	12.7
ERR3943996	PRJEB36754	Soil	Switzerland	Europe	11.3
ERR3943997	PRJEB36754	Soil	Switzerland	Europe	14.9
ERR3929366	PRJEB36754	Soil	Switzerland	Europe	11.3
ERR3929368	PRJEB36754	Soil	Switzerland	Europe	12.2
ERR3929372	PRJEB36754	Soil	Switzerland	Europe	12.9
ERR5762504	PRJEB44414	Soil	Kyrgyzstan	Asia	10.2
ERR5762868	PRJEB44414	Soil	Kyrgyzstan	Asia	10.4
ERR5763222	PRJEB44414	Soil	Kyrgyzstan	Asia	14.8
ERR5766521	PRJEB44414	Soil	Myanmar	Asia	10.2
ERR5766257	PRJEB44414	Soil	Myanmar	Asia	12.1
ERR5766908	PRJEB44414	Soil	Uganda	Africa	7.9
ERR2486618	PRJEB22376	Soil	Finland	Europe	9.4
ERR2486620	PRJEB22376	Soil	Finland	Europe	8.1
ERR2486621	PRJEB22376	Soil	Finland	Europe	8.6
ERR2486627	PRJEB22376	Soil	Finland	Europe	9
ERR2486629	PRJEB22376	Soil	Finland	Europe	8.3
ERR2486632	PRJEB22376	Soil	Finland	Europe	8.7
ERR2486633	PRJEB22376	Soil	Finland	Europe	8.5
ERR2486634	PRJEB22376	Soil	Finland	Europe	8
ERR2486635	PRJEB22376	Soil	Finland	Europe	9.3
ERR9527597	PRJEB52100	Soil	Switzerland	Europe	8.1
ERR9527609	PRJEB52100	Soil	Switzerland	Europe	8.3
ERR9527610	PRJEB52100	Soil	Switzerland	Europe	9
ERR9527613	PRJEB52100	Soil	Switzerland	Europe	9.4
ERR9527615	PRJEB52100	Soil	Switzerland	Europe	8.2
ERR1877884	PRJEB18701	Soil	Estonia	Europe	8.6
ERR1877887	PRJEB18701	Soil	Estonia	Europe	8.3
ERR1762243	PRJEB18675	Soil	Canada	North America	8.9
ERR1762244	PRJEB18675	Soil	Canada	North America	8.9
ERR1762265	PRJEB18675	Soil	Canada	North America	8.3
ERR1762266	PRJEB18675	Soil	Canada	North America	8.2
ERR1762272	PRJEB18675	Soil	Canada	North America	9.1
ERR1762291	PRJEB18675	Soil	Canada	North America	9.8
ERR1762297	PRJEB18675	Soil	Canada	North America	9.4
ERR1762331	PRJEB18675	Soil	Canada	North America	9.6
ERR1762332	PRJEB18675	Soil	Canada	North America	9.5
ERR1762337	PRJEB18675	Soil	Canada	North America	8.5
ERR1762348	PRJEB18675	Soil	Canada	North America	9.9
ERR1762350	PRJEB18675	Soil	Canada	North America	9.2
ERR1762249	PRJEB18675	Soil	Canada	North America	8.6
ERR1762250	PRJEB18675	Soil	Canada	North America	8.6
ERR1762255	PRJEB18675	Soil	Canada	North America	8.5
ERR1762256	PRJEB18675	Soil	Canada	North America	8.3
ERR1762271	PRJEB18675	Soil	Canada	North America	9.3
ERR1762292	PRJEB18675	Soil	Canada	North America	9.6
ERR1762298	PRJEB18675	Soil	Canada	North America	9.3
ERR1762322	PRJEB18675	Soil	Canada	North America	10
ERR1762338	PRJEB18675	Soil	Canada	North America	8.4
ERR1762349	PRJEB18675	Soil	Canada	North America	9.3
SRR2658004	PRJNA292297	Sediment	USA	North America	16.4
SRR2637322	PRJNA292297	Sediment	USA	North America	14.6
SRR2656924	PRJNA292297	Sediment	USA	North America	14.5
SRR2656926	PRJNA292297	Sediment	USA	North America	15.9
SRR2656927	PRJNA292297	Sediment	USA	North America	12.2
SRR2657076	PRJNA292297	Sediment	USA	North America	16.6
SRR2657155	PRJNA292297	Sediment	USA	North America	12.3
SRR2657207	PRJNA292297	Sediment	USA	North America	13.9
SRR2657222	PRJNA292297	Sediment	USA	North America	14.5
SRR2657233	PRJNA292297	Sediment	USA	North America	16.9
SRR2657579	PRJNA292297	Sediment	USA	North America	13.7
SRR2657590	PRJNA292297	Sediment	USA	North America	15.1
SRR2657627	PRJNA292297	Sediment	USA	North America	15.9
SRR2637706	PRJNA292297	Sediment	USA	North America	14.2
SRR2638077	PRJNA292297	Sediment	USA	North America	19.9
SRR7066493	PRJNA433242	Sediment	Denmark	Europe	14.7
SRR7066494	PRJNA433242	Sediment	Denmark	Europe	12.6
SRR12059192	PRJNA308531	Sediment	Denmark	Europe	11
SRR3089646	PRJNA297401	Sediment	Denmark	Europe	18.9
SRR3089688	PRJNA297401	Sediment	Denmark	Europe	13.4
SRR3089827	PRJNA297401	Sediment	Denmark	Europe	10.6
SRR3091719	PRJNA297401	Sediment	Denmark	Europe	12
SRR3091743	PRJNA297401	Sediment	Denmark	Europe	11.5
SRR3095933	PRJNA297401	Sediment	Denmark	Europe	12.9
SRR3095939	PRJNA297401	Sediment	Denmark	Europe	17.3
SRR3081468	PRJNA297401	Sediment	Denmark	Europe	11.8
SRR3081485	PRJNA297401	Sediment	Denmark	Europe	15.4
SRR3081534	PRJNA297401	Sediment	Denmark	Europe	12.1
SRR3081569	PRJNA297401	Sediment	Denmark	Europe	15.6
SRR3085416	PRJNA297401	Sediment	Denmark	Europe	19
SRR3085435	PRJNA297401	Sediment	Denmark	Europe	14.3
SRR3085585	PRJNA297401	Sediment	Denmark	Europe	14.1
SRR15677224	PRJNA728365	Sediment	USA	North America	16.6
SRR15677225	PRJNA728365	Sediment	USA	North America	18.4
SRR15677227	PRJNA728365	Sediment	USA	North America	19.4
SRR15677229	PRJNA728365	Sediment	USA	North America	19.6
SRR15677230	PRJNA728365	Sediment	USA	North America	19.3
SRR15677231	PRJNA728365	Sediment	USA	North America	17.8
SRR15677232	PRJNA728365	Sediment	USA	North America	19.9
SRR15677234	PRJNA728365	Sediment	USA	North America	15.6
SRR15677238	PRJNA728365	Sediment	USA	North America	10.9
SRR15677241	PRJNA728365	Sediment	USA	North America	10.4
SRR17401453	PRJNA792827	Sediment	USA	North America	12
SRR17401454	PRJNA792827	Sediment	USA	North America	18.8
SRR17401455	PRJNA792827	Sediment	USA	North America	19.4
SRR17401461	PRJNA792827	Sediment	USA	North America	17.9
SRR17401462	PRJNA792827	Sediment	USA	North America	19.3
SRR17401463	PRJNA792827	Sediment	USA	North America	14.4
SRR17401464	PRJNA792827	Sediment	USA	North America	13.9
SRR17848286	PRJNA802588	Sediment	USA	North America	16.3
SRR17848287	PRJNA802588	Sediment	USA	North America	15.1
SRR17848288	PRJNA802588	Sediment	USA	North America	15.8
SRR17848289	PRJNA802588	Sediment	USA	North America	16.3
SRR17848290	PRJNA802588	Sediment	USA	North America	13.4
SRR17848291	PRJNA802588	Sediment	USA	North America	16.8
SRR17848292	PRJNA802588	Sediment	USA	North America	12.2
SRR17848293	PRJNA802588	Sediment	USA	North America	17.4
SRR17848294	PRJNA802588	Sediment	USA	North America	17
SRR17848295	PRJNA802588	Sediment	USA	North America	15
SRR17848296	PRJNA802588	Sediment	USA	North America	13.4
SRR17848297	PRJNA802588	Sediment	USA	North America	15.1
SRR17848298	PRJNA802588	Sediment	USA	North America	19.3
SRR17848299	PRJNA802588	Sediment	USA	North America	14
SRR17848300	PRJNA802588	Sediment	USA	North America	15.7
SRR17848302	PRJNA802588	Sediment	USA	North America	14.2
SRR17848301	PRJNA802588	Sediment	USA	North America	12.8
ERR2431954	PRJEB25358	Sediment	South Korea	Asia	17
ERR2431955	PRJEB25358	Sediment	South Korea	Asia	20.5
ERR4833474	PRJEB41295	Sediment	China	Asia	12.4
ERR4833475	PRJEB41295	Sediment	China	Asia	15.4
ERR4833476	PRJEB41295	Sediment	China	Asia	12.2
ERR4833477	PRJEB41295	Sediment	China	Asia	12.6
ERR4833478	PRJEB41295	Sediment	China	Asia	11.1
ERR4833479	PRJEB41295	Sediment	China	Asia	13.8
ERR4833480	PRJEB41295	Sediment	China	Asia	12.9
ERR4833481	PRJEB41295	Sediment	China	Asia	14.1
ERR4833482	PRJEB41295	Sediment	China	Asia	11.9
ERR5037037	PRJEB42321	Sediment	South Korea	Asia	14.6
ERR5037038	PRJEB42321	Sediment	South Korea	Asia	11
ERR5037039	PRJEB42321	Sediment	South Korea	Asia	10.7
ERR5037040	PRJEB42321	Sediment	South Korea	Asia	10.7
ERR5037041	PRJEB42321	Sediment	South Korea	Asia	10.5
ERR5037042	PRJEB42321	Sediment	South Korea	Asia	10.6
SRR3943820	PRJNA330786	Sediment	Papua New Guinea	Oceania	13.5
SRR3943821	PRJNA330786	Sediment	Papua New Guinea	Oceania	13.1
SRR3943822	PRJNA330786	Sediment	Papua New Guinea	Oceania	12.6
SRR3943823	PRJNA330786	Sediment	Papua New Guinea	Oceania	13.6
ERR247139	PRJEB1690	Human Gut	Korea	Asia	4.5
ERR260171	PRJEB1786	Human Gut	Sweden	Europe	5.8
ERR260263	PRJEB1786	Human Gut	Sweden	Europe	2.9
ERR260267	PRJEB1786	Human Gut	Sweden	Europe	2.6
ERR2619708	PRJEB27005	Human Gut	Cameroon	Africa	4.4
ERR2619712	PRJEB27005	Human Gut	Cameroon	Africa	2.8
ERR2619719	PRJEB27005	Human Gut	Cameroon	Africa	3.4
ERR2619728	PRJEB27005	Human Gut	Cameroon	Africa	5.4
ERR2619732	PRJEB27005	Human Gut	Cameroon	Africa	3.4
ERR2619737	PRJEB27005	Human Gut	Cameroon	Africa	3.3
ERR2619741	PRJEB27005	Human Gut	Cameroon	Africa	3.6
ERR2619742	PRJEB27005	Human Gut	Cameroon	Africa	3.9
ERR2619743	PRJEB27005	Human Gut	Cameroon	Africa	3.3
ERR2619747	PRJEB27005	Human Gut	Cameroon	Africa	3
ERR2619753	PRJEB27005	Human Gut	Cameroon	Africa	3.4
ERR2619755	PRJEB27005	Human Gut	Cameroon	Africa	3.2
ERR2619760	PRJEB27005	Human Gut	Cameroon	Africa	3
ERR2619762	PRJEB27005	Human Gut	Cameroon	Africa	3.3
ERR2619763	PRJEB27005	Human Gut	Cameroon	Africa	6.1
ERR414265	PRJEB5224	Human Gut	Denmark	Europe	5.5
ERR414285	PRJEB5224	Human Gut	Denmark	Europe	4.3
ERR414291	PRJEB5224	Human Gut	Denmark	Europe	5.9
ERR414302	PRJEB5224	Human Gut	Denmark	Europe	6.7
ERR414305	PRJEB5224	Human Gut	Denmark	Europe	5.1
ERR414308	PRJEB5224	Human Gut	Denmark	Europe	6.1
ERR414318	PRJEB5224	Human Gut	Denmark	Europe	5.7
ERR414319	PRJEB5224	Human Gut	Denmark	Europe	5.3
ERR414421	PRJEB5224	Human Gut	Spain	Europe	3.7
ERR414453	PRJEB5224	Human Gut	Spain	Europe	8.6
ERR414475	PRJEB5224	Human Gut	Spain	Europe	11.3
ERR414493	PRJEB5224	Human Gut	Spain	Europe	4.1
ERR414496	PRJEB5224	Human Gut	Spain	Europe	5.2
ERR414497	PRJEB5224	Human Gut	Spain	Europe	5.7
ERR479161	PRJEB6070	Human Gut	France	Europe	3.5
ERR479327	PRJEB6070	Human Gut	France	Europe	4.2
ERR505083	PRJEB6092	Human Gut	Australia	Oceania	5.8
ERR505084	PRJEB6092	Human Gut	Australia	Oceania	7.6
ERR505085	PRJEB6092	Human Gut	Australia	Oceania	8.1
ERR505086	PRJEB6092	Human Gut	Australia	Oceania	4.8
ERR505087	PRJEB6092	Human Gut	Australia	Oceania	6.2
ERR505093	PRJEB6092	Human Gut	Australia	Oceania	7.6
ERR505097	PRJEB6092	Human Gut	Australia	Oceania	4.5
ERR505099	PRJEB6092	Human Gut	Australia	Oceania	4
ERR505103	PRJEB6092	Human Gut	Australia	Oceania	6.2
ERR505104	PRJEB6092	Human Gut	Australia	Oceania	5.6
ERR505105	PRJEB6092	Human Gut	Australia	Oceania	5.4
ERR505106	PRJEB6092	Human Gut	Australia	Oceania	4.5
ERR748156	PRJEB8347	Human Gut	Germany	Europe	4.1
SRR061169	PRJNA48479	Human Gut	USA	North America	6
SRR061494	PRJNA48479	Human Gut	USA	North America	5.9
SRR1761679	PRJNA268964	Human Gut	USA	North America	4.3
SRR1761680	PRJNA268964	Human Gut	USA	North America	4.4
SRR1761682	PRJNA268964	Human Gut	USA	North America	4
SRR1761685	PRJNA268964	Human Gut	USA	North America	4.7
SRR1761688	PRJNA268964	Human Gut	USA	North America	4.3
SRR1761692	PRJNA268964	Human Gut	USA	North America	4.5
SRR1761695	PRJNA268964	Human Gut	USA	North America	4.1
SRR1761699	PRJNA268964	Human Gut	Peru	South America	6.5
SRR1761704	PRJNA268964	Human Gut	Peru	South America	4.1
SRR1761705	PRJNA268964	Human Gut	Peru	South America	4.2
SRR1761708	PRJNA268964	Human Gut	Peru	South America	3.9
SRR1761711	PRJNA268964	Human Gut	Peru	South America	4.3
SRR1761712	PRJNA268964	Human Gut	Peru	South America	4.9
SRR1761715	PRJNA268964	Human Gut	Peru	South America	3.8
SRR1761717	PRJNA268964	Human Gut	Peru	South America	4.4
SRR1929408	PRJNA278393	Human Gut	Tanzania	Africa	6.1
SRR1930121	PRJNA278393	Human Gut	Tanzania	Africa	6.8
SRR1930141	PRJNA278393	Human Gut	Tanzania	Africa	6.3
SRR1931173	PRJNA278393	Human Gut	Italy	Europe	4.6
SRR341632	PRJNA422434	Human Gut	China	Asia	4.6
SRR341633	PRJNA422434	Human Gut	China	Asia	4.6
SRR3992955	PRJNA328899	Human Gut	Mongolia	Asia	11.8
SRR3992956	PRJNA328899	Human Gut	Mongolia	Asia	6.5
SRR3992974	PRJNA328899	Human Gut	Mongolia	Asia	5.8
SRR3992976	PRJNA328899	Human Gut	Mongolia	Asia	5.6
SRR3992979	PRJNA328899	Human Gut	Mongolia	Asia	6.4
SRR3992981	PRJNA328899	Human Gut	Mongolia	Asia	8.2
SRR3992983	PRJNA328899	Human Gut	Mongolia	Asia	5.9
SRR3992984	PRJNA328899	Human Gut	Mongolia	Asia	7.2
SRR3992992	PRJNA328899	Human Gut	Mongolia	Asia	4.9
SRR3992994	PRJNA328899	Human Gut	Mongolia	Asia	5.6
SRR3992995	PRJNA328899	Human Gut	Mongolia	Asia	11.5
SRR3993011	PRJNA328899	Human Gut	Mongolia	Asia	5.4
SRR3993029	PRJNA328899	Human Gut	China	Asia	4.2
SRR3993036	PRJNA328899	Human Gut	China	Asia	6
SRR3993038	PRJNA328899	Human Gut	China	Asia	5.5
SRR3993039	PRJNA328899	Human Gut	China	Asia	4.1
SRR3993041	PRJNA328899	Human Gut	China	Asia	12.9
SRR3993044	PRJNA328899	Human Gut	China	Asia	11.8
SRR4305530	PRJNA290380	Human Gut	Russia	Europe	4.1
SRR4408001	PRJNA290380	Human Gut	Finland	Europe	4.2
SRR7658581	PRJNA485056	Human Gut	MDG	Africa	7.3
SRR7658622	PRJNA485056	Human Gut	MDG	Africa	4.3
SRR7658627	PRJNA485056	Human Gut	MDG	Africa	5.1
SRR7658639	PRJNA485056	Human Gut	MDG	Africa	12.6
SRR7658652	PRJNA485056	Human Gut	MDG	Africa	6.7
SRR7658659	PRJNA485056	Human Gut	MDG	Africa	8.8
SRR7658661	PRJNA485056	Human Gut	MDG	Africa	8.5
SRR7658664	PRJNA485056	Human Gut	MDG	Africa	9
SRR8180447	PRJNA504891	Human Gut	Ethiopia	Africa	6.2
SRR8784356	PRJNA504891	Human Gut	Ethiopia	Africa	4.6
SRR8784358	PRJNA504891	Human Gut	Ethiopia	Africa	4.6
SRR8784364	PRJNA504891	Human Gut	Ethiopia	Africa	4.4
SRR8784370	PRJNA504891	Human Gut	Ethiopia	Africa	5

## Sheet: Table S3
Table S3: Average relative abundances (gene copies per cell) of ARGs for each drug class across all environments.
Environment	Drug Class	Average ARG Gene Copies / Cell
Activated Sludge	beta-lactam	0.0509378
Activated Sludge	multidrug	0.178067
Activated Sludge	fluoroquinolone	0.0103948
Activated Sludge	glycopeptide	0.00325582
Activated Sludge	polymyxin	0.000637335
Activated Sludge	phenicol	0.00467475
Activated Sludge	aminoglycoside	0.0546563
Activated Sludge	bacitracin	0.0897418
Activated Sludge	tetracycline	0.03126
Activated Sludge	unclassified	0.017342
Activated Sludge	MLS	0.0767495
Activated Sludge	fosfomycin	0
Activated Sludge	fusaric-acid	0
Activated Sludge	diaminopyrimidine	0.00261776
Activated Sludge	sulfonamide	0.0742716
Activated Sludge	fosmidomycin	0.00639202
Activated Sludge	tetracenomycin_C	0
Activated Sludge	rifamycin	0.00869119
Activated Sludge	nucleoside	0
Activated Sludge	fusidic-acid	0
Activated Sludge	peptide	0.00720478
Activated Sludge	oxazolidinone	0
Activated Sludge	acridine_dye	0
Activated Sludge	aminoglycoside:aminocoumarin	4.77e-05
Activated Sludge	aminocoumarin	0
Activated Sludge	antibacterial_free_fatty_acids	1.44e-05
Activated Sludge	mupirocin	0
Activated Sludge	bicyclomycin	0
Activated Sludge	triclosan	0.000132266
Activated Sludge	pleuromutilin	8.55e-06
Activated Sludge	polyamine:peptide	0
Activated Sludge	nitroimidazole	0.00140777
Chicken Feces	beta-lactam	0.375607
Chicken Feces	multidrug	2.21068
Chicken Feces	fluoroquinolone	0.164026
Chicken Feces	glycopeptide	0.236656
Chicken Feces	polymyxin	0.0382479
Chicken Feces	phenicol	0.179424
Chicken Feces	aminoglycoside	1.3037
Chicken Feces	bacitracin	0.162954
Chicken Feces	tetracycline	1.40118
Chicken Feces	unclassified	0.45282
Chicken Feces	MLS	1.51896
Chicken Feces	fosfomycin	0.0735267
Chicken Feces	fusaric-acid	0
Chicken Feces	diaminopyrimidine	0.0438069
Chicken Feces	sulfonamide	0.115757
Chicken Feces	fosmidomycin	0.0782243
Chicken Feces	tetracenomycin_C	0
Chicken Feces	rifamycin	0.00870401
Chicken Feces	nucleoside	0.10132
Chicken Feces	fusidic-acid	1.28e-05
Chicken Feces	peptide	0.224171
Chicken Feces	oxazolidinone	0.00180019
Chicken Feces	acridine_dye	5.66e-05
Chicken Feces	aminoglycoside:aminocoumarin	0.0622343
Chicken Feces	aminocoumarin	0.000425698
Chicken Feces	antibacterial_free_fatty_acids	4.3e-06
Chicken Feces	mupirocin	0.000494631
Chicken Feces	bicyclomycin	0
Chicken Feces	triclosan	5.8e-05
Chicken Feces	pleuromutilin	0.00280255
Chicken Feces	polyamine:peptide	0
Chicken Feces	nitroimidazole	0.0357598
Cow Manure	beta-lactam	0.117932
Cow Manure	multidrug	0.579058
Cow Manure	fluoroquinolone	0.0145207
Cow Manure	glycopeptide	0.0340371
Cow Manure	polymyxin	0.00551445
Cow Manure	phenicol	0.0104877
Cow Manure	aminoglycoside	0.0651299
Cow Manure	bacitracin	0.0872217
Cow Manure	tetracycline	0.436717
Cow Manure	unclassified	0.0914027
Cow Manure	MLS	0.265712
Cow Manure	fosfomycin	0.00484987
Cow Manure	fusaric-acid	0
Cow Manure	diaminopyrimidine	0.0282432
Cow Manure	sulfonamide	0.0119873
Cow Manure	fosmidomycin	0.0135416
Cow Manure	tetracenomycin_C	2.54e-05
Cow Manure	rifamycin	0.00397473
Cow Manure	nucleoside	0.000655585
Cow Manure	fusidic-acid	5.45e-06
Cow Manure	peptide	0.0850706
Cow Manure	oxazolidinone	0.000436414
Cow Manure	acridine_dye	3.2e-05
Cow Manure	aminoglycoside:aminocoumarin	0.00464508
Cow Manure	aminocoumarin	0
Cow Manure	antibacterial_free_fatty_acids	0.000500575
Cow Manure	mupirocin	0.000438107
Cow Manure	bicyclomycin	2.79e-05
Cow Manure	triclosan	0.0155395
Cow Manure	pleuromutilin	0.0035397
Cow Manure	polyamine:peptide	0
Cow Manure	nitroimidazole	0.00586081
Wastewater Effluent	beta-lactam	0.146527
Wastewater Effluent	multidrug	1.25966
Wastewater Effluent	fluoroquinolone	0.0684968
Wastewater Effluent	glycopeptide	0.0106044
Wastewater Effluent	polymyxin	0.0133875
Wastewater Effluent	phenicol	0.023084
Wastewater Effluent	aminoglycoside	0.177715
Wastewater Effluent	bacitracin	0.191173
Wastewater Effluent	tetracycline	0.105881
Wastewater Effluent	unclassified	0.133671
Wastewater Effluent	MLS	0.154969
Wastewater Effluent	fosfomycin	0.00489968
Wastewater Effluent	fusaric-acid	0
Wastewater Effluent	diaminopyrimidine	0.0166443
Wastewater Effluent	sulfonamide	0.0974378
Wastewater Effluent	fosmidomycin	0.036371
Wastewater Effluent	tetracenomycin_C	0
Wastewater Effluent	rifamycin	0.0223571
Wastewater Effluent	nucleoside	0.000555807
Wastewater Effluent	fusidic-acid	0
Wastewater Effluent	peptide	0.0849324
Wastewater Effluent	oxazolidinone	0.000259216
Wastewater Effluent	acridine_dye	0
Wastewater Effluent	aminoglycoside:aminocoumarin	0.0109566
Wastewater Effluent	aminocoumarin	0.00033217
Wastewater Effluent	antibacterial_free_fatty_acids	0.000423427
Wastewater Effluent	mupirocin	4.02e-05
Wastewater Effluent	bicyclomycin	0.00254072
Wastewater Effluent	triclosan	0.0341067
Wastewater Effluent	pleuromutilin	0.000256549
Wastewater Effluent	polyamine:peptide	0
Wastewater Effluent	nitroimidazole	0.0142001
Hospital Sewage	beta-lactam	0.909144
Hospital Sewage	multidrug	1.45157
Hospital Sewage	fluoroquinolone	0.165894
Hospital Sewage	glycopeptide	0.090758
Hospital Sewage	polymyxin	0.0179261
Hospital Sewage	phenicol	0.188116
Hospital Sewage	aminoglycoside	1.09795
Hospital Sewage	bacitracin	0.192905
Hospital Sewage	tetracycline	0.51295
Hospital Sewage	unclassified	0.170335
Hospital Sewage	MLS	0.753944
Hospital Sewage	fosfomycin	0.0137573
Hospital Sewage	fusaric-acid	0
Hospital Sewage	diaminopyrimidine	0.0956055
Hospital Sewage	sulfonamide	0.447848
Hospital Sewage	fosmidomycin	0.0518524
Hospital Sewage	tetracenomycin_C	0
Hospital Sewage	rifamycin	0.0491456
Hospital Sewage	nucleoside	0.0102597
Hospital Sewage	fusidic-acid	0
Hospital Sewage	peptide	0.147993
Hospital Sewage	oxazolidinone	0.00114703
Hospital Sewage	acridine_dye	0
Hospital Sewage	aminoglycoside:aminocoumarin	0.0185684
Hospital Sewage	aminocoumarin	0
Hospital Sewage	antibacterial_free_fatty_acids	0.000876229
Hospital Sewage	mupirocin	4.89e-05
Hospital Sewage	bicyclomycin	0.00120151
Hospital Sewage	triclosan	0.0265113
Hospital Sewage	pleuromutilin	0.00119816
Hospital Sewage	polyamine:peptide	0
Hospital Sewage	nitroimidazole	0.0247818
Human Gut	beta-lactam	0.382701
Human Gut	multidrug	0.85972
Human Gut	fluoroquinolone	0.046192
Human Gut	glycopeptide	0.180071
Human Gut	polymyxin	0.0185637
Human Gut	phenicol	0.0387628
Human Gut	aminoglycoside	0.175193
Human Gut	bacitracin	0.14082
Human Gut	tetracycline	0.983527
Human Gut	unclassified	0.144277
Human Gut	MLS	0.374575
Human Gut	fosfomycin	0.00516351
Human Gut	fusaric-acid	0
Human Gut	diaminopyrimidine	0.0497875
Human Gut	sulfonamide	0.024354
Human Gut	fosmidomycin	0.0249043
Human Gut	tetracenomycin_C	0
Human Gut	rifamycin	0.00025856
Human Gut	nucleoside	0.00415968
Human Gut	fusidic-acid	0
Human Gut	peptide	0.185003
Human Gut	oxazolidinone	0.00138554
Human Gut	acridine_dye	5.79e-06
Human Gut	aminoglycoside:aminocoumarin	0.0165031
Human Gut	aminocoumarin	0.000186148
Human Gut	antibacterial_free_fatty_acids	6.53e-06
Human Gut	mupirocin	0.00382773
Human Gut	bicyclomycin	0
Human Gut	triclosan	0
Human Gut	pleuromutilin	0.00662952
Human Gut	polyamine:peptide	0
Human Gut	nitroimidazole	0.0194099
Wastewater Influent	beta-lactam	0.398808
Wastewater Influent	multidrug	1.59677
Wastewater Influent	fluoroquinolone	0.1269
Wastewater Influent	glycopeptide	0.0273473
Wastewater Influent	polymyxin	0.0117582
Wastewater Influent	phenicol	0.0476582
Wastewater Influent	aminoglycoside	0.392643
Wastewater Influent	bacitracin	0.234351
Wastewater Influent	tetracycline	0.303564
Wastewater Influent	unclassified	0.1343
Wastewater Influent	MLS	0.937293
Wastewater Influent	fosfomycin	0.0119303
Wastewater Influent	fusaric-acid	0
Wastewater Influent	diaminopyrimidine	0.0282155
Wastewater Influent	sulfonamide	0.137914
Wastewater Influent	fosmidomycin	0.0298454
Wastewater Influent	tetracenomycin_C	4.52e-05
Wastewater Influent	rifamycin	0.00991707
Wastewater Influent	nucleoside	0.0026412
Wastewater Influent	fusidic-acid	0
Wastewater Influent	peptide	0.0851382
Wastewater Influent	oxazolidinone	2.22e-05
Wastewater Influent	acridine_dye	0.00102762
Wastewater Influent	aminoglycoside:aminocoumarin	0.012884
Wastewater Influent	aminocoumarin	9.9e-06
Wastewater Influent	antibacterial_free_fatty_acids	0.0130466
Wastewater Influent	mupirocin	1.35e-05
Wastewater Influent	bicyclomycin	0
Wastewater Influent	triclosan	0.0207294
Wastewater Influent	pleuromutilin	0.00203328
Wastewater Influent	polyamine:peptide	0
Wastewater Influent	nitroimidazole	0.0129181
Migratory Bird Droppings	beta-lactam	0.0783811
Migratory Bird Droppings	multidrug	1.08173
Migratory Bird Droppings	fluoroquinolone	0.051457
Migratory Bird Droppings	glycopeptide	0.055483
Migratory Bird Droppings	polymyxin	0.0236888
Migratory Bird Droppings	phenicol	0.0278428
Migratory Bird Droppings	aminoglycoside	0.14035
Migratory Bird Droppings	bacitracin	0.164157
Migratory Bird Droppings	tetracycline	0.220694
Migratory Bird Droppings	unclassified	0.245003
Migratory Bird Droppings	MLS	0.234017
Migratory Bird Droppings	fosfomycin	0.00971939
Migratory Bird Droppings	fusaric-acid	0
Migratory Bird Droppings	diaminopyrimidine	0.00903894
Migratory Bird Droppings	sulfonamide	0.0277168
Migratory Bird Droppings	fosmidomycin	0.0333253
Migratory Bird Droppings	tetracenomycin_C	0
Migratory Bird Droppings	rifamycin	0.00941442
Migratory Bird Droppings	nucleoside	0.00501484
Migratory Bird Droppings	fusidic-acid	0
Migratory Bird Droppings	peptide	0.120103
Migratory Bird Droppings	oxazolidinone	0.00075017
Migratory Bird Droppings	acridine_dye	0.00343556
Migratory Bird Droppings	aminoglycoside:aminocoumarin	0.025736
Migratory Bird Droppings	aminocoumarin	6.34e-05
Migratory Bird Droppings	antibacterial_free_fatty_acids	0.000122577
Migratory Bird Droppings	mupirocin	0.000244692
Migratory Bird Droppings	bicyclomycin	1.86e-05
Migratory Bird Droppings	triclosan	0.0547529
Migratory Bird Droppings	pleuromutilin	0.00317751
Migratory Bird Droppings	polyamine:peptide	0
Migratory Bird Droppings	nitroimidazole	0.0239371
Pig Feces	beta-lactam	0.141742
Pig Feces	multidrug	0.214849
Pig Feces	fluoroquinolone	0.00366804
Pig Feces	glycopeptide	0.0696222
Pig Feces	polymyxin	0.000938927
Pig Feces	phenicol	0.035211
Pig Feces	aminoglycoside	0.472902
Pig Feces	bacitracin	0.0570225
Pig Feces	tetracycline	1.74265
Pig Feces	unclassified	0.0251943
Pig Feces	MLS	1.04397
Pig Feces	fosfomycin	0.000167316
Pig Feces	fusaric-acid	0
Pig Feces	diaminopyrimidine	0.00564017
Pig Feces	sulfonamide	0.00325957
Pig Feces	fosmidomycin	0.00148572
Pig Feces	tetracenomycin_C	0
Pig Feces	rifamycin	0.000131297
Pig Feces	nucleoside	0.0419496
Pig Feces	fusidic-acid	0
Pig Feces	peptide	0.0998319
Pig Feces	oxazolidinone	0.0175641
Pig Feces	acridine_dye	0
Pig Feces	aminoglycoside:aminocoumarin	0.00106803
Pig Feces	aminocoumarin	1.05e-05
Pig Feces	antibacterial_free_fatty_acids	0
Pig Feces	mupirocin	0.00132048
Pig Feces	bicyclomycin	0
Pig Feces	triclosan	1.83e-05
Pig Feces	pleuromutilin	0.00344141
Pig Feces	polyamine:peptide	0
Pig Feces	nitroimidazole	0.00164234
Sediment	beta-lactam	0.00187199
Sediment	multidrug	0.216221
Sediment	fluoroquinolone	0.000574005
Sediment	glycopeptide	0.0051321
Sediment	polymyxin	0.0060589
Sediment	phenicol	0.000243289
Sediment	aminoglycoside	0.00586257
Sediment	bacitracin	0.0346874
Sediment	tetracycline	0.00382344
Sediment	unclassified	0.0321551
Sediment	MLS	0.0405171
Sediment	fosfomycin	0.000820499
Sediment	fusaric-acid	0
Sediment	diaminopyrimidine	0.00152547
Sediment	sulfonamide	0.00420141
Sediment	fosmidomycin	0.00607037
Sediment	tetracenomycin_C	7.33e-06
Sediment	rifamycin	0.00706407
Sediment	nucleoside	0
Sediment	fusidic-acid	0
Sediment	peptide	0.00909125
Sediment	oxazolidinone	0
Sediment	acridine_dye	0
Sediment	aminoglycoside:aminocoumarin	4.27e-05
Sediment	aminocoumarin	0
Sediment	antibacterial_free_fatty_acids	0.000151911
Sediment	mupirocin	0.000332778
Sediment	bicyclomycin	0
Sediment	triclosan	0.000320745
Sediment	pleuromutilin	0.000168395
Sediment	polyamine:peptide	0
Sediment	nitroimidazole	0.0039658
Soil	beta-lactam	0.00757711
Soil	multidrug	0.594462
Soil	fluoroquinolone	0.00564479
Soil	glycopeptide	0.194568
Soil	polymyxin	0.00132891
Soil	phenicol	0.000260108
Soil	aminoglycoside	0.0114204
Soil	bacitracin	0.0424393
Soil	tetracycline	0.0307857
Soil	unclassified	0.0387065
Soil	MLS	0.0504892
Soil	fosfomycin	0.000228016
Soil	fusaric-acid	0
Soil	diaminopyrimidine	0.00428327
Soil	sulfonamide	0.000514648
Soil	fosmidomycin	0.0315165
Soil	tetracenomycin_C	0.000619402
Soil	rifamycin	0.0681646
Soil	nucleoside	0.000318233
Soil	fusidic-acid	0
Soil	peptide	0.00186281
Soil	oxazolidinone	0
Soil	acridine_dye	0
Soil	aminoglycoside:aminocoumarin	2.23e-05
Soil	aminocoumarin	0
Soil	antibacterial_free_fatty_acids	0.000158467
Soil	mupirocin	0.000115041
Soil	bicyclomycin	0
Soil	triclosan	0.00439823
Soil	pleuromutilin	0.000409135
Soil	polyamine:peptide	0
Soil	nitroimidazole	0.00306671
Surface Water	beta-lactam	0.0848093
Surface Water	multidrug	0.718943
Surface Water	fluoroquinolone	0.0400739
Surface Water	glycopeptide	0.0111569
Surface Water	polymyxin	0.0104667
Surface Water	phenicol	0.0297756
Surface Water	aminoglycoside	0.171893
Surface Water	bacitracin	0.182748
Surface Water	tetracycline	0.0940202
Surface Water	unclassified	0.0843894
Surface Water	MLS	0.158046
Surface Water	fosfomycin	0.00138802
Surface Water	fusaric-acid	3.63e-06
Surface Water	diaminopyrimidine	0.0222917
Surface Water	sulfonamide	0.115786
Surface Water	fosmidomycin	0.0256515
Surface Water	tetracenomycin_C	4.79e-06
Surface Water	rifamycin	0.00834079
Surface Water	nucleoside	0.000753385
Surface Water	fusidic-acid	0
Surface Water	peptide	0.0654939
Surface Water	oxazolidinone	0.000102383
Surface Water	acridine_dye	0.000254251
Surface Water	aminoglycoside:aminocoumarin	0.00978501
Surface Water	aminocoumarin	0
Surface Water	antibacterial_free_fatty_acids	0.00102735
Surface Water	mupirocin	0.00052136
Surface Water	bicyclomycin	2.32e-06
Surface Water	triclosan	0.00194392
Surface Water	pleuromutilin	0.00193428
Surface Water	polyamine:peptide	0
Surface Water	nitroimidazole	0.0133407

## Sheet: Table S4
Table S4. Rankings of environments based on the average values of ERR, HHRR, Shannon diversity of ARGs and MGEs, ARG abundance, coverage, number of contigs, and N50. A ranking of "1" indicates the environment with the highest average for the corresponding category. Samples with zero mapped reads to the crAssphage and sul1 genomes were removed prior to calculating average abundance.
	ERR	HHRR	ARG Diversity	Taxonomic Diversity	MGE Diversity	ARG Abundance	MGE Abundance	Coverage	# of Contigs	N50	Crassphage Abundance	Sul1 Abundance
Wastewater Influent	1	4	1	6	1	3	2	8	7	9	1	2
Hospital Sewage	2	2	2	8	2	2	4	3	9	8	2	1
Human Gut	3	3	6	12	8	5	3	2	12	1	5	9
Chicken Feces	4	1	9	11	4	1	1	1	11	2	7	6
Migratory Bird Dropping	5	6	8	10	9	6	6	4	10	5	10	7
Wastewater Effluent	6	7	4	5	5	7	8	5	8	3	4	4
Surface Water	7	8	10	4	6	9	9	9	6	6	6	5
Soil	8	11	5	3	11	10	11	12	2	12	12	11
Pig Feces	9	5	7	7	10	4	5	6	5	4	11	12
Cow Manure	10	9	11	9	12	8	7	7	4	7	8	10
Activated Sludge	11	10	3	2	3	11	10	10	3	10	3	3
Sediment	12	12	12	1	7	12	12	11	1	11	9	8

## Sheet: Table S5
Table S5: Overview of statistical characteristics of dataset.
Sample	Environment	ERR	HHRR	Coverage	ARG abundance	Number of contigs	N50	ARG diversity	MGE diversity	MGE abundance	Taxonomic diversity
ERR1676588	Soil	6.6456	0.066956	0.249718	1.85094	1120127	569	3.02309	0.997718	29.3389	5.955
ERR1676591	Soil	6.57903	0.058892	0.24877	1.92554	1103702	563	3.10417	1.05055	29.1487	5.87346
ERR1676592	Soil	5.89321	0.073202	0.300537	1.96142	1024544	657	2.9993	1.01361	27.6634	5.9037
ERR1676593	Soil	7.35465	0.063008	0.213373	2.07976	1031609	528	3.25518	0.929791	31.2005	5.83098
ERR1762243	Soil	6.19616	0.03192	0.261937	1.55203	1644705	487	3.35931	0.877537	32.1161	5.36834
ERR1762244	Soil	6.04967	0.022626	0.260485	1.56279	1657401	487	3.33116	0.8686	31.5199	5.36577
ERR1762249	Soil	5.89991	0.025681	0.364131	1.5231	1654909	604	3.22929	0.918386	63.9217	5.37679
ERR1762250	Soil	6.08301	0.024031	0.356706	1.5186	1664489	604	3.24331	0.917747	64.3884	5.37874
ERR1762255	Soil	6.04968	0.024884	0.287677	1.3568	1707886	553	3.17097	1.06481	42.0093	5.69183
ERR1762256	Soil	6.18618	0.040564	0.285148	1.3868	1664012	550	3.19293	1.05154	41.8495	5.68951
ERR1762265	Soil	6.3127	0.028315	0.213426	1.59537	1412681	468	3.14414	0.941771	30.7278	5.70233
ERR1762266	Soil	6.38928	0.029108	0.213035	1.56347	1374186	467	3.13276	0.938393	30.1473	5.69901
ERR1762271	Soil	6.17286	0.023137	0.24704	1.26689	1728819	507	3.3265	1.06045	33.6113	5.87242
ERR1762272	Soil	6.18952	0.039625	0.247968	1.26855	1703462	505	3.29088	1.06406	33.8035	5.87128
ERR1762283	Soil	6.79873	0.058713	0.184959	1.39424	1916075	469	3.16231	0.954577	25.8035	5.92477
ERR1762284	Soil	6.67225	0.051757	0.181474	1.40212	1883784	469	3.14719	0.954611	25.5812	5.92414
ERR1762289	Soil	5.57024	0.035487	0.368039	0.982818	3029231	556	3.12427	1.04195	29.7312	5.8732
ERR1762290	Soil	5.43039	0.034016	0.367486	0.985957	3013229	556	3.09829	1.04629	29.999	5.87124
ERR1762291	Soil	5.97312	0.033233	0.397572	1.29797	2106303	614	3.13315	1.07185	39.6939	5.43595
ERR1762292	Soil	6.06301	0.027652	0.406524	1.3455	2079370	612	3.14179	1.06354	39.488	5.43439
ERR1762297	Soil	6.4525	0.050762	0.18558	1.25674	1526707	458	3.27894	1.07324	24.8445	5.9857
ERR1762298	Soil	6.42587	0.054499	0.186565	1.31468	1513767	457	3.29673	1.08151	25.2581	5.98783
ERR1762299	Soil	6.56236	0.039176	0.197857	1.29997	1722968	469	3.24187	1.01391	25.4233	5.92661
ERR1762300	Soil	6.59565	0.051242	0.198985	1.33399	1707584	469	3.25486	1.00991	25.6006	5.92587
ERR1762301	Soil	6.15622	0.038019	0.203894	1.31824	1578159	466	3.09498	0.913496	23.0024	5.89735
ERR1762302	Soil	6.29603	0.051143	0.207225	1.33541	1564215	466	3.08672	0.916742	22.8531	5.89469
ERR1762321	Soil	6.2361	0.040537	0.208051	1.2387	1911814	469	3.06925	1.01502	25.2159	5.86296
ERR1762322	Soil	6.28272	0.034598	0.218683	1.18158	1878688	468	3.06491	1.00549	24.6714	5.86221
ERR1762331	Soil	6.61896	0.030493	0.338058	1.47014	1885646	602	3.1988	1.03684	50.5695	5.34474
ERR1762332	Soil	6.65558	0.030822	0.333866	1.51646	1865560	601	3.21905	1.04112	51.2502	5.34575
ERR1762337	Soil	6.51244	0.044352	0.178972	1.31664	1127327	445	3.21472	1.02259	26.8913	5.97242
ERR1762338	Soil	6.54238	0.038147	0.177059	1.33846	1114111	445	3.19095	1.00167	26.6408	5.97317
ERR1762347	Soil	6.55571	0.059562	0.23361	1.42488	1846790	507	3.29513	1.06453	36.4756	5.75458
ERR1762348	Soil	6.599	0.035817	0.22619	1.41671	1814750	506	3.28196	1.06257	37.3385	5.75376
ERR1762349	Soil	6.85197	0.048214	0.147636	1.31655	1503695	445	3.19287	1.05704	32.6625	5.94874
ERR1762350	Soil	6.78872	0.032025	0.147319	1.31956	1483228	445	3.21767	1.063	32.7061	5.9467
ERR1762353	Soil	6.50911	0.036627	0.316219	1.51757	2388944	571	3.27209	1.05852	43.6706	5.55601
ERR1762354	Soil	6.45919	0.036155	0.31741	1.50471	2350944	571	3.25979	1.0518	43.8057	5.55721
ERR1877884	Soil	4.37142	0.031255	0.108178	0.595524	4719250	435	2.81073	0.903396	14.5755	6.22259
ERR1877887	Soil	4.66116	0.033056	0.110631	0.776178	4159550	439	2.92093	0.900019	17.7675	6.13375
ERR2486618	Soil	6.23612	0.013756	0.196675	0.763438	908685	402	2.97376	0.96719	17.023	6.46782
ERR2486620	Soil	6.17953	0.034077	0.35199	0.808622	660259	394	2.8949	0.970727	19.9717	6.38596
ERR2486621	Soil	6.14622	0.025782	0.297547	0.751597	775718	404	2.81798	0.968291	20.2127	6.39665
ERR2486627	Soil	5.90318	0.014008	0.290307	0.924005	1070839	437	3.03759	0.982958	18.4149	6.34004
ERR2486629	Soil	6.15954	0.027229	0.223097	0.995473	918119	420	2.96316	0.97415	18.215	6.25254
ERR2486632	Soil	5.87654	0.034772	0.371933	0.824076	862755	427	2.86747	0.983734	17.4025	6.34891
ERR2486633	Soil	6.40922	0.025381	0.314732	1.02515	787975	414	2.95008	0.981581	22.0912	6.20834
ERR2486634	Soil	6.48247	0.027219	0.321359	1.04876	826622	416	2.99632	0.974386	24.4368	6.16402
ERR2486635	Soil	5.90983	0.03754	0.385752	0.98737	932342	422	2.88052	0.979044	21.2816	6.22867
ERR3929365	Soil	4.09499	0.020697	0.207044	0.487434	6522531	450	2.92482	0.862252	19.2199	6.38763
ERR3929366	Soil	4.11831	0.023107	0.194949	0.459756	5085091	444	3.04418	0.865239	19.9545	6.37182
ERR3929367	Soil	4.09166	0.023523	0.199368	0.437627	5101362	445	3.12241	0.885019	20.1178	6.44269
ERR3929368	Soil	4.15494	0.027353	0.194032	0.422358	5392414	449	3.10545	0.881531	19.7098	6.43605
ERR3929369	Soil	4.20157	0.020786	0.192197	0.440376	5412305	449	3.01695	0.853665	19.334	6.37682
ERR3929370	Soil	3.89182	0.018335	0.204871	0.48511	5726673	446	2.90941	0.867432	18.376	6.39393
ERR3929371	Soil	3.97175	0.01878	0.232142	0.393481	6123435	459	3.06277	0.888092	16.9836	6.48981
ERR3929372	Soil	3.82187	0.017674	0.20194	0.390612	5799580	448	3.01338	0.871278	16.6082	6.53355
ERR3929373	Soil	3.88849	0.023423	0.235977	0.414628	7364448	458	2.9955	0.876099	16.8016	6.4685
ERR3943989	Soil	4.21156	0.023773	0.200952	0.511032	6835556	454	2.93051	0.862596	19.3371	6.36916
ERR3943991	Soil	4.32146	0.024723	0.205666	0.439453	5359323	449	3.10688	0.880291	20.0321	6.42465
ERR3943992	Soil	4.32146	0.026891	0.193403	0.432389	5671122	452	3.10924	0.879277	19.9784	6.42131
ERR3943993	Soil	4.25818	0.02377	0.189944	0.451962	5679370	452	3.01009	0.853178	19.416	6.3606
ERR3943994	Soil	3.98841	0.022087	0.193936	0.490889	5998968	450	2.89346	0.866062	18.4485	6.37429
ERR3943995	Soil	4.085	0.018362	0.23274	0.399946	6398932	463	3.05314	0.885554	17.1389	6.47584
ERR3943996	Soil	3.91846	0.019795	0.204542	0.394591	6061999	452	2.9894	0.872249	16.849	6.51726
ERR3943997	Soil	4.05835	0.024352	0.22848	0.425678	7699670	463	3.00374	0.875193	17.0708	6.45182
ERR4392702	Soil	6.53906	0.031211	0.461793	1.35348	1842318	530	3.14636	0.973368	20.2955	6.02966
ERR4392704	Soil	5.8599	0.010361	0.474712	0.93918	1689027	563	3.02689	1.03365	24.5015	5.71664
ERR4392705	Soil	5.98643	0.009573	0.450013	1.01996	1044652	564	2.89615	1.04886	23.2097	5.50962
ERR4392707	Soil	5.95978	0.033684	0.387721	1.24119	1335925	482	3.15425	0.980925	21.8552	6.16758
ERR4392710	Soil	6.336	0.023474	0.440939	1.04388	958516	517	2.97711	1.01733	23.7142	5.70664
ERR4392711	Soil	5.10073	0.011546	0.334899	0.867982	866118	434	3.27265	0.911727	19.2303	6.28342
ERR4392712	Soil	5.24391	0.00303	0.4269	1.00031	825191	506	3.1543	0.931657	16.179	6.35338
ERR4392713	Soil	5.67678	0.010752	0.412737	1.17915	697541	506	3.11149	1.00248	17.2316	6.16137
ERR4392714	Soil	6.15622	0.032492	0.456266	1.18214	1538850	518	3.1788	0.968452	22.0303	6.16805
ERR4392715	Soil	6.10628	0.015403	0.363447	1.11144	649234	465	3.14705	1.00554	22.7881	6.16909
ERR4392716	Soil	6.06631	0.022616	0.30333	0.890152	773786	434	3.20577	0.939166	19.0484	6.30698
ERR4392717	Soil	6.95517	0.026941	0.398628	1.24581	1206349	477	3.27333	0.933229	20.8756	6.06807
ERR4392718	Soil	6.53572	0.03184	0.363457	1.09763	942214	477	3.1764	0.990399	20.1272	6.02893
ERR4392719	Soil	7.24474	0.011774	0.331879	1.07058	1061672	443	3.11062	0.975644	27.3072	6.01129
ERR4392720	Soil	5.86658	0.019962	0.444226	0.863141	1001895	505	2.98292	0.995541	21.8736	5.89991
ERR4392721	Soil	5.88986	0.037952	0.331686	0.938611	724588	410	3.31543	0.894408	24.36	6.15596
ERR4392723	Soil	6.59898	0.022344	0.398658	1.11864	1454493	489	3.11584	0.990718	25.176	5.92468
ERR4392724	Soil	5.87655	0.009847	0.368661	1.04361	761671	484	3.04558	1.01892	25.1568	5.62302
ERR4392725	Soil	5.0974	0.016645	0.598268	0.683708	1051392	609	2.78045	1.03035	15.1054	5.87594
ERR4392726	Soil	6.84198	0.019146	0.374891	1.11733	1044601	421	3.19558	0.900115	20.4546	6.13596
ERR4392727	Soil	7.28136	0.027756	0.315149	1.27291	900702	454	3.1855	0.981405	24.0824	5.94386
ERR4392728	Soil	6.15954	0.013231	0.430453	0.980958	1700522	528	2.98542	1.01305	24.4733	5.62622
ERR4837091	Soil	6.589	0.037933	0.218683	1.18803	1515836	467	3.02905	1.01219	19.5312	6.25602
ERR4837094	Soil	6.326	0.009789	0.23317	1.06797	1276981	520	2.96172	0.997795	29.1649	6.09098
ERR4837098	Soil	6.65559	0.022234	0.268729	1.07231	1349304	547	3.00274	1.02183	27.0851	6.05236
ERR4837129	Soil	5.11075	0.010872	0.495054	0.930632	1839566	773	2.61627	0.902085	52.2281	5.7484
ERR4837135	Soil	4.61454	0.015451	0.283296	0.857013	1779797	559	2.73562	1.03339	33.0409	6.37066
ERR4837136	Soil	4.77773	0.019601	0.267602	0.89986	1530544	549	2.83214	1.01882	32.816	6.36535
ERR4837137	Soil	4.88428	0.014958	0.253974	0.874054	1671369	528	2.84915	1.027	29.0907	6.39681
ERR4837145	Soil	4.87096	0.01794	0.281258	0.843516	1950903	547	2.88567	1.06815	28.1294	6.35869
ERR5762504	Soil	4.33479	0.021946	0.319182	0.740996	1708699	507	2.86909	0.991215	35.9302	6.67055
ERR5762868	Soil	4.44136	0.026081	0.341599	0.712688	1917115	493	2.78292	1.00749	23.4059	6.74293
ERR5763222	Soil	4.50131	0.017704	0.401995	0.746199	2683019	524	2.83748	1.03719	31.1008	6.74698
ERR5766257	Soil	4.93423	0.011	0.335841	0.689921	1818121	447	3.04898	1.01068	18.5775	6.65515
ERR5766521	Soil	4.78104	0.012779	0.278218	0.609769	1369392	428	2.99963	1.01829	16.3417	6.81793
ERR5766908	Soil	5.32716	0.015512	0.287729	0.753217	1289280	435	2.99894	1.02513	17.2267	6.49938
ERR9527597	Soil	8.04353	0.060075	0.185805	2.08744	582598	529	3.42312	0.98124	37.5246	5.72303
ERR9527609	Soil	8.06017	0.030986	0.182847	2.11449	645458	508	3.48735	0.994237	48.3275	5.63772
ERR9527610	Soil	7.77397	0.037207	0.187624	2.02158	739104	507	3.46943	0.991839	46.1853	5.67191
ERR9527613	Soil	7.50768	0.033317	0.205083	2.01511	750364	490	3.51398	0.98971	46.1363	5.56332
ERR9527615	Soil	7.24808	0.052759	0.212982	2.28364	900306	490	3.48711	0.971863	47.4245	5.28738
ERR2431954	Sediment	1.32982	0.006735	0.306161	0.318693	3340616	568	2.01095	1.02483	18.9673	7.34737
ERR2431955	Sediment	3.75526	0.036121	0.452111	0.429663	3875890	647	2.78387	0.955091	18.0566	6.46379
ERR4833474	Sediment	2.13288	0.010453	0.225948	0.327954	2391698	472	2.30794	1.04795	19.2689	7.07176
ERR4833475	Sediment	2.34279	0.004545	0.231387	0.331688	2750508	490	2.26238	1.04157	19.219	7.15704
ERR4833476	Sediment	2.40942	0.00649	0.184894	0.347903	2311271	472	2.35084	1.07842	18.7725	7.23665
ERR4833477	Sediment	2.28615	0.003059	0.186072	0.339968	2451621	459	2.35661	1.04573	17.8743	7.12319
ERR4833478	Sediment	2.74259	0.013039	0.169082	0.408402	1917259	457	2.51793	1.03622	21.9441	7.05653
ERR4833479	Sediment	2.39609	0.013711	0.15842	0.330664	2188024	442	2.36071	1.03899	19.8857	7.13208
ERR4833480	Sediment	2.24616	0.009314	0.181345	0.3696	2147273	459	2.23398	1.01619	23.0509	7.10095
ERR4833481	Sediment	2.33279	0.011263	0.169158	0.3476	2441512	452	2.31273	1.03414	21.3919	7.1664
ERR4833482	Sediment	2.47272	0.009407	0.156485	0.353171	1860310	453	2.31884	1.04723	20.7655	7.15446
ERR5037037	Sediment	1.34982	0.006935	0.168888	0.417399	360495	553	1.44728	1.03906	5.95258	6.93083
ERR5037038	Sediment	1.59308	0.008137	0.158442	0.422008	307255	549	1.52044	1.04265	6.4122	6.93239
ERR5037039	Sediment	1.36981	0.01195	0.198038	0.404151	418415	566	1.47096	1.05333	6.86063	6.7953
ERR5037040	Sediment	1.48978	0	0.180454	0.442163	346926	570	1.56886	1.04013	6.96551	6.90658
ERR5037041	Sediment	1.2865	0	0.142013	0.405701	227820	528	1.49512	1.03456	5.47056	6.93398
ERR5037042	Sediment	1.03989	0	0.172967	0.404739	263183	548	1.46427	1.07114	5.89032	6.95961
SRR12059192	Sediment	2.80255	0	0.988018	0.605939	91580	674	2.14368	1.49068	11.3174	6.41489
SRR15677224	Sediment	3.52876	0.006549	0.601568	0.206157	5725721	531	2.56941	1.03032	10.1877	6.62831
SRR15677225	Sediment	4.31147	0.007101	0.585545	0.243402	6336850	537	2.51657	0.998931	10.0665	6.61781
SRR15677227	Sediment	4.29482	0.00674	0.634659	0.2078	5563623	552	2.56108	0.986588	10.9198	6.55395
SRR15677229	Sediment	4.36143	0.008166	0.681817	0.241658	5817007	554	2.54077	1.02114	11.2711	6.51956
SRR15677230	Sediment	3.88849	0.008559	0.527708	0.185719	7886382	497	2.61828	1.00693	9.3336	6.60054
SRR15677231	Sediment	3.3189	0.005871	0.599161	0.143596	5961579	493	2.64461	1.08447	5.96314	6.93677
SRR15677232	Sediment	3.78523	0.006883	0.519373	0.19245	7990497	479	2.67014	1.00545	9.30796	6.67092
SRR15677234	Sediment	3.65533	0.00483	0.564303	0.17154	5693388	522	2.57217	1.02072	8.09582	6.66166
SRR15677238	Sediment	2.77923	0.004863	0.594728	0.274375	1542399	771	2.51589	1.22927	6.94784	6.76366
SRR15677241	Sediment	4.1716	0.006063	0.398798	0.660106	1649465	679	2.83239	1.11435	17.5412	6.69219
SRR17401453	Sediment	2.93581	0.001457	0.240287	0.326956	1715863	418	2.70765	1.19904	11.2584	7.04692
SRR17401454	Sediment	3.31224	0.010609	0.262787	0.425936	2827757	435	2.93904	1.17986	15.5356	7.04303
SRR17401455	Sediment	3.87849	0.008801	0.219126	0.455425	2556512	410	2.96523	1.13732	15.1648	7.0878
SRR17401461	Sediment	3.75525	0.011096	0.22396	0.567594	2929107	429	2.96106	1.04452	17.734	6.89904
SRR17401462	Sediment	3.23229	0.015451	0.253953	0.4765	3074270	430	3.00939	1.15323	15.8391	6.97648
SRR17401463	Sediment	2.49604	0.004277	0.339516	0.32967	2338336	455	2.7683	1.21076	14.4226	6.99844
SRR17401464	Sediment	3.17899	0.011233	0.226936	0.407376	2002948	418	2.88518	1.17609	13.8871	7.03993
SRR17848286	Sediment	4.33146	0.012242	0.255398	0.659773	3267460	494	3.00291	1.0835	22.1768	6.75206
SRR17848287	Sediment	4.31814	0.009426	0.246487	0.658131	2917514	490	2.93457	1.06676	21.7961	6.76584
SRR17848288	Sediment	3.29558	0.020599	0.252008	0.559721	3276862	486	2.81827	1.05231	21.7079	6.76538
SRR17848289	Sediment	4.30148	0.009335	0.188426	0.579063	2946053	435	2.98728	1.09891	17.3973	6.88261
SRR17848290	Sediment	4.02838	0.012892	0.165698	0.627675	2133141	422	2.94316	1.04459	19.7292	6.77244
SRR17848291	Sediment	3.92513	0.015992	0.190606	0.501361	2501231	413	2.96106	1.06646	17.8809	6.86305
SRR17848292	Sediment	3.33889	0.01094	0.192731	0.521285	2285089	441	2.97729	1.13351	18.7583	6.90529
SRR17848293	Sediment	2.85918	0.010091	0.224055	0.490315	3716036	451	2.7878	1.08962	18.4157	6.9233
SRR17848294	Sediment	5.37378	0.01743	0.173668	0.778401	2438294	424	3.01726	1.01366	23.8872	6.601
SRR17848295	Sediment	4.18492	0.014634	0.229205	0.629653	2904176	478	2.91633	1.07052	20.9743	6.7922
SRR17848296	Sediment	4.27484	0.008057	0.224539	0.63215	2482386	481	2.92648	1.07411	21.2418	6.79974
SRR17848297	Sediment	3.41883	0.01382	0.237076	0.541155	3075281	478	2.73737	1.05556	20.1519	6.80458
SRR17848298	Sediment	4.10498	0.007229	0.193094	0.547467	3458210	437	2.9041	1.11118	16.9406	6.93076
SRR17848299	Sediment	4.84099	0.007883	0.137008	0.627891	1902708	408	2.90898	1.04872	19.5638	6.8051
SRR17848300	Sediment	5.39375	0.023991	0.172288	0.790047	2396688	437	3.0721	1.00635	24.6192	6.54264
SRR17848301	Sediment	3.3189	0.008347	0.240496	0.440812	1796946	409	2.91233	1.13929	14.1164	7.03625
SRR17848302	Sediment	3.51543	0.005453	0.187335	0.394204	1833739	397	2.70915	1.09539	13.9882	6.94334
SRR2637322	Sediment	2.50274	0.005074	0.46255	0.761269	492696	682	2.8392	1.49266	15.6232	5.13802
SRR2637706	Sediment	2.29614	0.014799	0.308796	0.523128	675731	639	2.44542	1.24378	7.00695	7.31727
SRR2638077	Sediment	2.47272	0.012511	0.366703	0.486184	1598546	583	2.6196	1.21321	8.55099	7.43375
SRR2656924	Sediment	2.47938	0.004584	0.203459	0.506053	545407	513	2.41954	1.17285	6.76319	7.3382
SRR2656926	Sediment	2.576	0.003881	0.218905	0.596598	644142	556	2.57467	1.44397	11.3125	7.40758
SRR2656927	Sediment	2.66262	0.017421	0.254597	0.685087	717535	617	2.63579	1.2337	7.02843	7.32429
SRR2657076	Sediment	2.79256	0.015031	0.253755	0.548865	498962	492	2.69046	1.53227	31.8163	6.93998
SRR2657155	Sediment	2.76258	0.009703	0.227115	0.68566	515323	635	2.65436	1.28817	8.02625	7.32261
SRR2657207	Sediment	2.73592	0.015958	0.162979	0.603916	469970	493	2.51953	1.21718	6.84841	7.31823
SRR2657222	Sediment	2.66929	0	0.207489	0.453603	585534	452	2.73167	1.23991	11.9213	6.89395
SRR2657233	Sediment	3.04907	0.007511	0.188587	0.367108	665663	412	2.58282	1.2009	9.86325	7.36725
SRR2657579	Sediment	3.05909	0.015915	0.235893	0.618569	471238	587	2.6753	1.31015	8.17932	6.79299
SRR2657590	Sediment	2.74924	0.005854	0.269515	0.478603	854172	533	2.61178	1.15484	8.39307	7.33257
SRR2657627	Sediment	4.13165	0.036803	0.436426	0.6572	543426	714	3.04162	1.58824	24.8666	5.74395
SRR2658004	Sediment	3.82192	0.011664	0.396395	0.592694	643007	653	2.99941	1.45893	18.4996	5.54956
SRR3081468	Sediment	1.47978	0.001472	0.277187	0.167386	1698843	472	1.35946	1.24167	8.47332	7.39313
SRR3081485	Sediment	1.36981	0.004507	0.343975	0.17675	2218823	498	1.29288	1.25585	9.74498	6.90735
SRR3081534	Sediment	1.1632	0.005867	0.460495	0.169742	1278444	567	1.20231	1.25556	7.86128	7.14965
SRR3081569	Sediment	1.24318	0.004777	0.530076	0.176396	1570141	604	1.15763	1.27631	8.78952	6.72453
SRR3085416	Sediment	1.26651	0.003855	0.678386	0.0455833	5187968	609	1.15256	1.27934	4.54032	6.18996
SRR3085435	Sediment	1.25318	0.005974	0.641181	0.0430501	4185039	597	1.11126	1.29287	4.54329	6.18143
SRR3085585	Sediment	1.15653	0.00235	0.747031	0.0368038	3192024	606	1.08298	1.30611	4.25805	6.57224
SRR3089646	Sediment	1.13654	0.002665	0.782354	0.0382757	3752681	617	1.06091	1.30636	4.22963	6.58105
SRR3089688	Sediment	1.09655	0.003384	0.354953	0.15193	2216003	502	1.21762	1.29337	9.80037	6.17215
SRR3089827	Sediment	1.19986	0.004367	0.521978	0.154226	1144931	615	1.08997	1.35667	10.1996	5.39923
SRR3091719	Sediment	1.40314	0.002603	0.623784	0.043114	3841146	570	1.06834	1.29294	4.15544	6.5379
SRR3091743	Sediment	1.42313	0.001354	0.605708	0.0437567	3693428	567	1.09068	1.29827	4.15026	6.54061
SRR3095933	Sediment	1.18653	0.004991	0.662678	0.0377565	3506007	608	1.2849	1.20532	7.34179	5.12608
SRR3095939	Sediment	1.16653	0.001704	0.697483	0.0418263	4401117	615	1.16295	1.20729	7.44892	5.13514
SRR3943820	Sediment	1.71971	0.003183	0.281464	0.127896	3142023	442	1.5485	0.970616	15.7036	6.96635
SRR3943821	Sediment	1.63307	0.00355	0.300046	0.149181	2817289	458	1.58585	1.02839	16.8166	6.93504
SRR3943822	Sediment	1.49311	0.001716	0.293468	0.121633	2914229	458	1.23157	1.07323	13.2138	7.09625
SRR3943823	Sediment	1.46312	0.002495	0.284613	0.155335	3006225	460	1.35746	1.09128	14.064	7.2202
SRR7066493	Sediment	1.07988	0.002128	0.39818	0.057494	3524611	556	1.64638	1.12601	7.83354	7.30508
SRR7066494	Sediment	0.943244	0	0.446376	0.0442963	2991973	576	1.43969	1.23836	4.30558	7.32242
SRR14932477	Activated Sludge	3.18567	0.067388	0.519324	0.677925	1966220	525	3.89291	1.52866	29.1327	6.44062
SRR14932478	Activated Sludge	3.32892	0.075521	0.522347	0.628181	2085487	543	3.85222	1.36662	21.5379	6.48242
SRR14932479	Activated Sludge	4.89105	0.151213	0.765199	1.86055	1239951	797	3.86746	1.43414	44.1608	5.77186
SRR14932482	Activated Sludge	3.60875	0.062295	0.659542	0.577764	1926318	654	3.76361	1.40619	33.5935	6.46557
SRR14932483	Activated Sludge	3.60208	0.05798	0.649963	0.690757	1595355	604	3.42617	1.27929	28.3794	6.37853
SRR14932484	Activated Sludge	2.08291	0.034874	0.604031	0.24362	1577106	640	3.82471	1.57368	26.5067	6.26225
SRR14932488	Activated Sludge	3.59209	0.051808	0.649601	0.728701	1688920	610	3.39632	1.22882	29.6192	6.31616
SRR14932490	Activated Sludge	3.01578	0.072379	0.539034	0.744	2141494	572	3.91728	1.49857	28.4496	6.75083
SRR14932500	Activated Sludge	3.10905	0.05501	0.553248	0.649457	2635869	605	3.9028	1.35933	33.9282	6.53076
SRR14932501	Activated Sludge	2.73596	0.043506	0.736238	0.452145	1494043	752	3.68171	1.37567	33.1152	6.81363
SRR14932502	Activated Sludge	3.65877	0.07791	0.916147	0.646071	513408	797	3.12491	1.3632	31.8461	6.00885
SRR14932503	Activated Sludge	3.29893	0.03323	0.535856	0.415662	2557926	593	3.43652	1.23483	31.2717	6.43483
SRR14932505	Activated Sludge	3.01577	0.03281	0.630431	0.535154	1904874	621	3.43891	1.24204	35.3871	6.40421
SRR14932512	Activated Sludge	2.84922	0.028757	0.709643	0.28396	1651763	798	3.35918	1.43434	28.6708	6.93938
SRR14932515	Activated Sludge	4.17168	0.051846	0.708784	0.661282	1784110	746	3.51355	1.38191	41.1131	6.00931
SRR14932517	Activated Sludge	3.24231	0.045469	0.63067	0.676426	1979355	701	3.6704	1.29149	47.3194	6.2654
SRR14932518	Activated Sludge	3.13237	0.055374	0.63937	0.616953	2212204	724	3.73371	1.35274	46.1274	6.22359
SRR14932520	Activated Sludge	3.23231	0.045651	0.540923	0.665952	2190512	559	3.89406	1.35773	34.798	6.55471
SRR14932521	Activated Sludge	2.82257	0.030747	0.744437	0.494521	1382246	729	3.56118	1.3765	34.248	6.86272
SRR14932524	Activated Sludge	3.15236	0.03816	0.623268	0.48226	2030894	617	3.61017	1.31684	25.4526	6.61759
SRR14932525	Activated Sludge	3.35556	0.039236	0.580053	0.480314	2230068	583	3.6396	1.40214	29.5341	6.64506
SRR14932530	Activated Sludge	3.54879	0.058936	0.704931	0.909482	1484664	647	3.74943	1.3551	45.9919	6.4336
SRR14932531	Activated Sludge	3.05575	0.02779	0.535953	0.470715	2608854	611	3.68199	1.29929	33.3597	6.489
SRR14932532	Activated Sludge	3.34891	0.0476	0.606053	0.730357	2100812	666	3.91825	1.40342	38.3927	6.16125
SRR14932538	Activated Sludge	3.37888	0.045959	0.620171	0.570731	2121445	618	3.59471	1.43061	32.5518	6.31295
SRR14932539	Activated Sludge	3.73197	0.038465	0.559121	0.594945	2404742	626	3.73326	1.26403	34.8048	6.52012
SRR14932540	Activated Sludge	3.66867	0.037336	0.562364	0.564039	2343541	613	3.68815	1.24264	32.1318	6.53052
SRR14932541	Activated Sludge	3.59206	0.04229	0.560144	0.522897	2246396	620	3.80243	1.28997	31.0517	6.67086
SRR14932542	Activated Sludge	3.80524	0.039229	0.562634	0.544772	2421659	628	3.68265	1.2566	32.9631	6.53165
SRR14932543	Activated Sludge	3.75527	0.034652	0.570261	0.361186	1947926	576	3.53051	1.37531	20.8217	6.639
SRR14932544	Activated Sludge	3.42884	0.028703	0.592913	0.584276	1916154	605	3.37419	1.32398	38.0472	6.32904
SRR14932545	Activated Sludge	3.86186	0.053124	0.60267	0.429124	2023572	609	3.85608	1.43515	25.7553	6.74051
SRR14932546	Activated Sludge	3.53212	0.040508	0.622895	0.883107	1728063	621	3.84181	1.34878	40.4273	6.25318
SRR14932547	Activated Sludge	3.68532	0.037143	0.546537	0.488251	2490384	670	3.716	1.31512	27.4141	6.55249
SRR14932548	Activated Sludge	3.64203	0.037344	0.583035	0.441697	2543893	659	3.42501	1.31186	32.0076	6.30831
SRR14932549	Activated Sludge	3.50213	0.029518	0.554166	0.523487	2710188	597	3.4935	1.30918	31.667	6.47181
SRR14932550	Activated Sludge	3.02245	0.03427	0.63277	0.446623	2334377	720	3.47439	1.36665	34.6162	6.319
SRR14932551	Activated Sludge	3.2956	0.026489	0.572217	0.485149	2359479	654	3.46079	1.35738	37.3508	6.1929
SRR14932556	Activated Sludge	3.0624	0.02497	0.469003	0.335529	2502984	497	3.35918	1.2874	17.2359	6.69665
SRR14932558	Activated Sludge	3.20566	0.044466	0.623736	0.451644	2305110	659	3.63667	1.30243	24.8721	6.5872
SRR14932560	Activated Sludge	2.69264	0.038994	0.73905	0.463709	1474568	751	3.60091	1.38601	33.988	6.81067
SRR14932561	Activated Sludge	3.50213	0.035653	0.604376	0.634537	1963366	590	3.59612	1.37873	33.5891	6.30333
SRR14932567	Activated Sludge	2.80256	0.026312	0.545008	0.494799	2470323	556	3.58692	1.31222	23.0348	6.72025
SRR14932568	Activated Sludge	3.29229	0.045174	0.709643	0.53006	1604881	710	3.64299	1.33664	28.029	6.37227
SRR14932571	Activated Sludge	3.59206	0.022972	0.645326	0.437241	1741267	616	3.40695	1.33426	21.9126	6.55223
SRR14932572	Activated Sludge	3.47547	0.031361	0.629534	0.4476	1833458	608	3.43917	1.32775	22.2793	6.58172
SRR14932574	Activated Sludge	4.96765	0.082725	0.794908	1.08305	1087936	820	3.9203	1.35669	57.7184	6.05318
SRR14932575	Activated Sludge	5.5171	0.09835	0.783692	1.19584	1093025	820	4.04284	1.35893	63.5914	6.0388
SRR14932576	Activated Sludge	3.30226	0.040085	0.501183	0.564921	2432344	523	3.8035	1.28848	28.0085	6.74859
SRR14932577	Activated Sludge	3.64204	0.032979	0.56218	0.628214	2425802	572	3.77822	1.35371	32.2851	6.62719
SRR14932579	Activated Sludge	3.72867	0.088314	0.790199	0.677606	1104010	851	3.72041	1.34955	44.1994	6.3774
SRR14932580	Activated Sludge	3.8286	0.081247	0.792245	0.710133	923098	858	3.75772	1.40745	48.1595	6.43268
SRR14932582	Activated Sludge	3.13571	0.054879	0.608084	0.585921	2095500	653	3.77517	1.47825	39.695	6.3529
SRR14932584	Activated Sludge	5.41385	0.088005	0.793292	0.894499	965841	940	3.56555	1.34051	52.7533	6.23068
SRR14932585	Activated Sludge	3.26228	0.035556	0.556021	0.595551	2039011	547	3.5741	1.26226	23.7084	6.4175
SRR14932589	Activated Sludge	2.85586	0.019379	0.535672	0.569572	1935111	552	3.52777	1.29575	23.6126	6.74026
SRR14932595	Activated Sludge	4.35151	0.070278	0.751708	0.951863	1387337	769	3.74484	1.41284	58.646	6.32707
SRR14932597	Activated Sludge	3.48549	0.033094	0.633371	1.05836	1888575	631	3.73244	1.344	41.951	6.26581
SRR14932598	Activated Sludge	3.29894	0.027056	0.644583	0.692361	1663218	656	3.41757	1.39673	33.158	6.44296
SRR14932600	Activated Sludge	3.63203	0.027863	0.53667	0.566309	2063644	521	3.49735	1.26055	27.2524	6.60427
SRR14932601	Activated Sludge	3.53876	0.028224	0.50287	0.509642	2037263	526	3.47374	1.30138	26.9616	6.5631
SRR14932602	Activated Sludge	2.37612	0.071447	0.658259	0.557493	1364632	683	4.07604	1.63106	29.3174	6.77437
SRR14932604	Activated Sludge	3.72538	0.072061	0.859573	0.603778	763232	826	3.31884	1.47692	42.5614	6.09022
SRR14932607	Activated Sludge	3.36889	0.044886	0.559758	0.667527	2172180	593	3.79414	1.24789	29.2983	6.66333
SRR14932616	Activated Sludge	3.2623	0.057043	0.624835	0.621478	2016015	647	3.62967	1.32454	48.6825	6.32052
SRR14932617	Activated Sludge	4.93764	0.088476	0.642811	0.946847	1780123	672	3.88734	1.3861	52.7864	5.7364
SRR14932619	Activated Sludge	5.29395	0.081563	0.718719	0.813011	1501895	710	3.74774	1.36656	48.6722	5.99755
SRR14932624	Activated Sludge	4.69456	0.086157	0.750572	0.953467	1363781	787	3.94831	1.28871	46.0793	5.59108
SRR14932626	Activated Sludge	5.29073	0.128025	0.801173	1.18555	1093523	766	3.81351	1.26166	56.8942	5.06835
SRR14932628	Activated Sludge	3.13236	0.024575	0.461036	0.319605	2746716	522	3.56051	1.27026	16.3812	6.68972
SRR14932629	Activated Sludge	3.40553	0.054677	0.550106	0.74343	2240432	624	3.86214	1.4218	34.6425	6.18475
SRR14932630	Activated Sludge	3.12237	0.023448	0.524261	0.410617	2665495	578	3.77466	1.34387	22.4136	6.64683
SRR14932632	Activated Sludge	3.04575	0.036438	0.526018	0.506355	2264134	532	3.55637	1.39696	27.2978	6.67519
SRR14932633	Activated Sludge	3.78859	0.02971	0.561688	0.48962	1430501	547	3.69556	1.51612	31.6031	6.77223
SRR14932634	Activated Sludge	3.26895	0.025193	0.622131	0.303806	1885467	649	3.16261	1.32381	15.0385	6.60018
SRR14932635	Activated Sludge	2.79591	0.034839	0.696585	0.275173	1578689	791	3.35345	1.43172	28.5392	6.93048
SRR14932644	Activated Sludge	3.20899	0.060638	0.564756	0.616028	2391227	646	3.90531	1.4492	29.8574	6.48168
SRR14932645	Activated Sludge	3.21233	0.054847	0.511785	0.762051	2734855	577	3.90173	1.40106	27.2953	6.59429
SRR14932646	Activated Sludge	3.06242	0.04067	0.594392	0.527008	2212894	645	3.37911	1.3747	24.9805	6.494
SRR14932656	Activated Sludge	3.88185	0.08547	0.572843	0.730763	2018225	577	3.92673	1.42418	26.9042	6.76714
SRR14932659	Activated Sludge	3.40221	0.085142	0.599573	0.960199	2143446	633	4.01897	1.51141	33.9193	6.51994
SRR14932660	Activated Sludge	3.09574	0.072128	0.579919	1.04316	2530214	634	3.97135	1.45829	34.8715	6.48269
SRR14932661	Activated Sludge	3.2723	0.064469	0.613389	0.644527	2093998	653	3.70581	1.3392	28.0952	6.25941
SRR14932662	Activated Sludge	3.58206	0.046948	0.478936	0.372198	2396271	557	3.6957	1.30815	17.7783	6.75795
SRR14932663	Activated Sludge	3.31558	0.049607	0.46648	0.340754	2167023	537	3.66266	1.47467	21.8576	6.82174
SRR14932664	Activated Sludge	3.5188	0.108008	0.581949	0.86338	2222028	618	4.08951	1.38144	31.3005	6.82334
SRR14932666	Activated Sludge	3.38553	0.061511	0.566579	0.505735	2397914	593	3.66795	1.40872	23.7527	6.61905
SRR14932668	Activated Sludge	3.66534	0.046384	0.58765	0.792609	2263707	603	3.5416	1.24301	37.8088	6.49407
SRR14932669	Activated Sludge	3.21232	0.051154	0.520695	0.50713	1905998	512	3.67632	1.36659	25.2332	6.47571
SRR14932670	Activated Sludge	2.9858	0.075483	0.510441	0.894518	2318388	545	4.08036	1.50132	30.1072	6.80392
SRR14932671	Activated Sludge	3.36889	0.071148	0.529523	0.761954	2108253	566	3.90514	1.37996	23.1963	6.7678
SRR14932673	Activated Sludge	3.76862	0.052025	0.645221	0.678367	1826043	723	3.66103	1.38533	41.8559	6.16044
SRR14932675	Activated Sludge	4.58135	0.084575	0.810017	0.893266	945898	928	3.58527	1.4068	32.2247	5.871
SRR14932677	Activated Sludge	3.21899	0.032628	0.537978	0.494245	2605153	611	3.34068	1.25913	39.3806	6.38045
SRR14932678	Activated Sludge	2.68264	0.037508	0.578822	0.675707	2332822	637	3.58247	1.2553	34.7319	6.50488
SRR14932679	Activated Sludge	2.81922	0.027703	0.434192	0.377221	2707257	521	3.41398	1.27324	24.1967	6.5419
SRR14932680	Activated Sludge	2.74925	0.019376	0.44611	0.343874	2967541	533	3.29934	1.26961	23.1252	6.57903
SRR14932681	Activated Sludge	2.74592	0.026353	0.452929	0.345462	2940822	535	3.34273	1.27055	22.914	6.60322
SRR14932682	Activated Sludge	4.46479	0.07202	0.748684	0.784481	1249635	883	3.4255	1.1789	54.3005	6.04638
SRR14932684	Activated Sludge	3.44884	0.047239	0.503211	0.48457	2540265	570	3.46709	1.30203	40.3463	6.3713
SRR14932685	Activated Sludge	3.53211	0.028481	0.507812	0.485491	2633285	591	3.34955	1.33474	43.3032	6.32507
SRR14932686	Activated Sludge	3.44883	0.045048	0.506662	0.509696	2663792	581	3.44141	1.31721	41.7051	6.3875
SRR14932687	Activated Sludge	3.61206	0.05746	0.548182	0.677405	2392948	595	3.84731	1.41871	36.016	6.50838
SRR14932693	Activated Sludge	3.72533	0.090373	0.723263	0.474791	1549109	800	3.94503	1.3835	25.7371	6.83614
SRR14932695	Activated Sludge	3.61871	0.059778	0.434696	0.415422	2132886	518	3.73778	1.35247	20.5343	6.80243
SRR14932697	Activated Sludge	3.2423	0.06186	0.59917	0.531767	1899434	576	3.50565	1.52049	31.0915	6.54326
SRR14932699	Activated Sludge	3.35223	0.060445	0.6217	0.494433	1819810	607	3.35866	1.34455	21.3485	6.4638
SRR14932700	Activated Sludge	3.07907	0.068783	0.620161	0.56589	1926332	598	3.8024	1.45842	26.695	6.13629
SRR14932702	Activated Sludge	3.35889	0.080516	0.524882	0.623695	2080308	537	3.77795	1.40194	22.5568	6.60272
ERR1193289	Surface Water	3.04585	0.226025	0.594094	1.86641	1183466	693	3.68964	1.54597	13.776	5.17761
ERR1193293	Surface Water	5.56385	0.335481	0.481599	1.77754	536528	501	4.26389	1.42571	23.5856	6.63898
ERR1193294	Surface Water	3.38559	0.155786	0.471603	1.48864	433281	671	3.5689	1.08701	17.3606	4.12169
ERR1193298	Surface Water	5.21767	0.199663	0.633819	1.48453	1289645	893	3.45757	1.26359	27.4198	5.03432
ERR1414266	Surface Water	5.64016	0.042613	0.677134	0.995227	352005	481	3.53005	1.26726	31.1762	6.43702
ERR1713331	Surface Water	14.7626	0.248686	0.757274	7.151	1588309	652	4.03758	1.30327	201.178	3.61207
ERR1713346	Surface Water	6.91233	0.266301	0.702663	2.92106	1182841	640	4.58233	1.29483	109.18	4.98833
ERR3503278	Surface Water	11.2893	0.439061	0.442193	5.70746	717411	792	4.58466	1.46511	61.3729	5.64537
ERR3503279	Surface Water	10.5229	0.32512	0.541504	4.46147	1414814	616	4.33174	1.44735	86.4954	5.82775
ERR3503280	Surface Water	10.109	0.544418	0.94737	63.5694	229591	558	4.1056	1.52315	396.037	0.47994
ERR3503282	Surface Water	8.05062	0.271285	0.525319	2.84382	1115031	609	4.03327	1.41797	67.5508	6.22999
ERR3503283	Surface Water	10.8465	0.373526	0.446119	5.81606	776359	786	4.59908	1.48104	58.9564	5.86584
ERR3503289	Surface Water	12.0674	0.58799	0.544834	8.10309	518694	902	4.74188	1.5197	85.27	5.18752
ERR3503291	Surface Water	8.6799	0.358716	0.451658	3.94085	745694	780	4.19353	1.46892	39.5948	6.01249
ERR3503292	Surface Water	8.77275	0.289382	0.537978	3.41533	1278548	621	4.23604	1.47288	70.8874	6.30708
ERR3503293	Surface Water	9.01952	0.327154	0.552736	5.0003	1184428	945	4.41668	1.45885	48.9358	5.94298
ERR3503296	Surface Water	11.5739	0.3553	0.553779	3.80232	1160948	636	4.39351	1.45213	81.048	5.56337
ERR3503300	Surface Water	13.5331	0.460749	0.632025	10.0994	1600591	659	4.74458	1.46691	195.575	5.15356
ERR3503301	Surface Water	16.8087	0.769546	0.458548	13.7227	256625	745	4.58681	1.54157	132.435	4.84497
ERR3503303	Surface Water	13.3964	0.403562	0.614958	6.44707	1437153	642	4.68728	1.41718	131.768	5.43841
ERR3503306	Surface Water	13.5094	0.383834	0.657869	6.97288	1856201	653	4.7075	1.43263	139.217	5.49041
ERR3503308	Surface Water	10.4829	0.258629	0.689299	3.8527	2532523	658	4.48567	1.37319	87.9316	5.75412
ERR3503310	Surface Water	12.911	0.493295	0.453165	5.09595	846315	576	4.60504	1.46836	99.0897	5.60478
ERR3503311	Surface Water	10.5201	0.364527	0.519023	5.37297	864109	874	4.40509	1.43374	50.7698	5.72394
ERR3503313	Surface Water	11.9817	0.522184	0.598316	8.64117	631932	932	4.77738	1.43415	97.427	5.42229
ERR3503314	Surface Water	12.7214	0.341559	0.635413	5.68544	1405268	667	4.57684	1.45137	113.521	5.49645
ERR3503316	Surface Water	10.3373	0.409823	0.582641	6.63133	622196	949	4.57109	1.4232	71.5076	5.33348
SRR10036019	Surface Water	7.59768	0.005818	0.795338	0.698491	2148679	667	1.60658	0.864664	17.1557	4.45008
SRR10036021	Surface Water	6.90869	0.055748	0.652028	0.982177	2017980	679	2.76991	1.15665	27.4992	5.04525
SRR10036022	Surface Water	5.36055	0.054666	0.562142	0.952205	1234762	692	3.06954	1.25361	33.3125	5.48788
SRR10036024	Surface Water	8.15681	0.024837	0.701189	0.91415	2415787	664	2	0.980148	22.0071	4.37378
SRR10036025	Surface Water	7.4512	0.005575	0.781447	0.686067	2242136	678	1.54596	0.887174	17.1862	4.39887
SRR10036026	Surface Water	7.2848	0.026197	0.688996	0.916132	2481161	687	2.2769	1.06056	24.3511	4.64893
SRR10036028	Surface Water	7.31143	0.007081	0.658753	0.91878	2118303	704	2.34895	1.02293	23.1756	4.8225
SRR10036029	Surface Water	4.99755	0.009878	0.491039	0.690125	2024606	630	2.40446	1.14299	21.4331	5.49671
SRR10036031	Surface Water	6.67561	0.00468	0.663172	0.722272	1602518	750	2.11384	0.966814	19.1089	4.87697
SRR10036033	Surface Water	6.69227	0.004374	0.646107	0.735636	1714650	742	2.03522	1.03802	20.5785	4.94451
SRR10036035	Surface Water	6.60909	0.021238	0.586093	0.980919	1059436	810	2.73408	1.25743	29.6334	4.80932
SRR10036038	Surface Water	8.39997	0.048485	0.679447	1.43807	1495287	831	3.37512	1.32137	42.8825	4.45888
SRR10036039	Surface Water	8.24355	0.07962	0.687519	1.52131	1224549	855	3.5816	1.41318	53.0362	4.65791
SRR10036040	Surface Water	8.01044	0.013987	0.716126	1.02438	1251169	802	2.36134	1.02814	24.6825	4.04345
SRR10036041	Surface Water	6.55915	0.009478	0.60545	0.917271	1055115	802	2.47243	1.0907	24.6607	4.63498
SRR10036042	Surface Water	7.91725	0.007016	0.677068	0.893988	1425322	809	2.21237	1.03022	22.732	4.30386
SRR10036043	Surface Water	6.60243	0.012702	0.6275	0.916973	1377747	876	2.47393	1.1035	23.6506	5.16739
SRR10036044	Surface Water	6.7922	0.010709	0.646202	0.941076	1400631	877	2.50499	1.08438	22.7109	5.13228
SRR10036045	Surface Water	5.7801	0.012315	0.611513	0.914591	1421000	849	2.66678	1.17219	25.4675	5.42948
SRR10036046	Surface Water	5.7301	0.00851	0.682869	0.500891	2056281	764	1.78474	1.05589	15.5775	4.84249
SRR10036047	Surface Water	6.67568	0.011193	0.627777	0.774818	1340066	853	2.23057	1.12855	22.4152	5.20023
SRR10036048	Surface Water	5.92992	0.006918	0.60267	0.681641	1806942	902	2.05067	1.10868	21.3147	5.32432
SRR10036049	Surface Water	6.89539	0.004295	0.668851	0.750251	1746042	864	2.11879	1.10589	20.6966	5.20494
SRR10036050	Surface Water	5.92658	0.012477	0.472368	0.821516	801451	922	2.81291	1.17592	24.1348	5.48656
SRR10036051	Surface Water	7.67756	0.002717	0.525494	0.773121	920139	707	2.63869	1.02355	18.5702	4.96099
SRR10036052	Surface Water	8.10691	0.018874	0.51123	0.761831	662269	795	2.50598	1.02932	18.9899	4.8173
SRR10036053	Surface Water	6.33945	0	0.655929	1.00266	689972	1043	2.60732	1.31959	33.5346	4.57089
SRR10036054	Surface Water	5.05752	0.010752	0.629992	1.13207	1162602	927	2.73112	1.32854	37.9092	4.55898
SRR10036055	Surface Water	6.68898	0.006513	0.716692	1.1515	1151599	879	2.64537	1.26621	31.9349	4.24951
SRR10036056	Surface Water	6.67565	0.013682	0.622685	0.98814	1461725	806	2.75365	1.18217	27.0103	4.82609
SRR10036057	Surface Water	8.20342	0.008256	0.775626	0.782108	2119727	734	1.67172	0.920281	19.0427	4.20608
SRR10036058	Surface Water	5.92991	0.018445	0.59153	1.02044	1219812	817	2.89313	1.22851	29.0844	5.08827
SRR10036059	Surface Water	6.19626	0.021007	0.601539	0.963134	1666130	770	2.77291	1.19233	26.7862	5.01814
SRR10036060	Surface Water	8.95562	0.061634	0.460751	1.63312	1379107	732	3.70378	1.27519	39.2133	6.0008
SRR10036061	Surface Water	9.52454	0.068745	0.44242	1.39707	1381900	745	3.59813	1.21099	32.5687	5.88554
SRR10036063	Surface Water	5.49377	0.023278	0.642954	0.974792	1288780	901	2.65063	1.25731	29.7821	4.6072
SRR10036066	Surface Water	1.89298	0.017519	0.280259	0.61334	1284294	599	3.04241	1.26039	31.789	6.41416
SRR10036067	Surface Water	2.31947	0.035722	0.288047	0.573506	1539649	565	3.10416	1.27815	24.7784	6.40236
SRR10036069	Surface Water	1.66973	0.024172	0.262486	0.554399	1241120	592	2.97589	1.28704	32.7452	6.5174
SRR10036070	Surface Water	5.3838	0.030118	0.317329	0.907875	830072	736	3.25645	1.16883	25.9919	5.79665
SRR10036072	Surface Water	5.20066	0.026706	0.363125	0.872223	1497810	760	3.21944	1.22987	27.0539	5.73721
SRR10036074	Surface Water	5.0242	0.002065	0.744268	0.44316	1210868	826	1.82822	1.01177	14.6051	4.60223
SRR10036075	Surface Water	5.3039	0.009552	0.727606	0.501109	1046850	802	1.8278	1.02096	15.8856	4.52532
SRR10036076	Surface Water	5.6069	0.006029	0.52396	0.68352	1658591	741	2.10226	1.0711	20.0526	5.54216
SRR10036077	Surface Water	5.65017	0.006189	0.598911	0.659213	1615638	820	2.18167	1.02163	18.7738	5.09803
SRR10036079	Surface Water	7.22163	0.014987	0.847846	0.720439	1501327	1028	2.1911	1.15717	24.6073	4.13922
SRR10036080	Surface Water	9.13526	0.061364	0.824196	0.864834	1099989	890	2.00899	1.05045	23.324	4.45497
SRR10036084	Surface Water	7.6509	0.007751	0.765658	0.635814	1935108	685	1.49393	0.898362	16.2403	4.51662
SRR10036085	Surface Water	8.19338	0.008522	0.705686	0.738227	1466804	674	1.63557	0.926715	18.5466	4.51499
SRR10036086	Surface Water	7.62756	0.006378	0.783813	0.650004	1959748	630	1.59738	0.889015	16.4862	4.39003
SRR10036087	Surface Water	8.15345	0.005821	0.759601	0.659451	1288441	642	1.62584	1.01059	19.2654	4.21308
SRR10036088	Surface Water	8.21334	0.005926	0.749501	0.699326	1687619	655	1.53883	0.892457	17.3158	4.27665
SRR10036089	Surface Water	8.01035	0.007818	0.799633	0.717004	2238464	657	1.45454	0.848004	17.1325	4.35205
SRR10492802	Surface Water	1.72304	0.021167	0.662602	0.21084	1771656	634	2.0808	1.07595	28.2669	6.40243
SRR10492803	Surface Water	3.169	0.016724	0.529901	0.27739	1943341	561	2.99381	0.995291	17.0008	6.37123
SRR11567520	Surface Water	4.29161	0.066235	0.649449	1.13568	1547509	819	3.67876	1.32647	32.0327	6.72147
SRR11567522	Surface Water	4.33481	0.022999	0.323046	0.633361	1195715	585	2.81478	1.05494	21.5235	6.62644
SRR11567523	Surface Water	3.99176	0.04521	0.302	0.589089	1769489	504	3.21809	1.0825	20.7616	6.87261
SRR11567524	Surface Water	3.50877	0.022426	0.261325	0.410299	1783646	475	2.91478	1.09276	15.1354	7.00188
SRR11567525	Surface Water	7.13832	0.068948	0.237589	1.01114	1631643	486	3.86584	1.29696	31.7173	6.56183
SRR11567529	Surface Water	5.9134	0.145883	0.565402	2.91446	2107821	739	4.4524	1.53601	87.8608	6.24991
SRR11567531	Surface Water	3.81858	0.034417	0.355054	0.611457	1815934	549	3.11706	1.08126	22.9922	6.75931
SRR11567532	Surface Water	3.96845	0.027272	0.288479	0.5147	1558376	509	3.02725	1.06831	19.4752	6.88684
SRR11567533	Surface Water	3.54209	0.017968	0.260568	0.419816	1808767	469	2.94036	1.0982	14.6943	7.04347
SRR11567534	Surface Water	3.30225	0.009702	0.216099	0.387971	1546108	450	2.85256	1.0968	13.597	7.04981
SRR11567535	Surface Water	3.86517	0.015697	0.214113	0.516005	1592660	439	3.21433	1.1016	17.602	6.91429
SRR11567536	Surface Water	4.47466	0.018675	0.180734	0.548814	1338692	418	3.22811	1.09066	18.1451	6.8813
SRR11567538	Surface Water	7.75749	0.126826	0.359977	2.04529	1419250	554	4.20344	1.28793	57.5463	6.05341
SRR11567540	Surface Water	4.84114	0.109098	0.586669	1.05749	1604048	732	4.1124	1.43172	34.6529	6.18994
SRR11567541	Surface Water	4.25819	0.023763	0.233138	0.510407	1157255	462	3.16444	1.12519	17.8082	6.81682
SRR11567542	Surface Water	4.85767	0.047097	0.255522	0.828685	1645543	484	3.5071	1.14307	31.6364	6.64008
SRR12685660	Surface Water	4.0318	0.007748	0.855901	0.437058	1290615	1001	1.30253	0.950631	16.1873	5.51513
SRR12685661	Surface Water	4.21163	0.018732	0.878404	0.459453	1067689	1114	1.37523	0.912777	13.6879	4.95965
SRR12685662	Surface Water	3.89859	0.0111	0.88167	0.419751	1126174	994	1.28247	0.866884	10.9751	4.33036
SRR12685663	Surface Water	4.05846	0.013495	0.877405	0.458126	1111553	840	0.898075	0.794955	11.5474	4.30878
SRR12685664	Surface Water	3.97849	0.0137	0.845813	0.445453	912394	846	1.21012	0.833719	11.6963	4.69341
SRR12685665	Surface Water	6.38929	0.028462	0.641743	0.643361	1493213	518	3.3631	0.943424	17.5561	5.58776
SRR12685668	Surface Water	3.70537	0.016223	0.844782	0.415255	1232812	941	1.05337	0.843938	10.8843	5.59057
SRR12685669	Surface Water	3.54215	0.016313	0.79982	0.428499	1226028	935	1.3348	0.916708	12.9747	5.86009
SRR12685670	Surface Water	3.70869	0.010421	0.827714	0.425252	1199462	906	1.11211	0.864542	11.1845	5.43649
SRR12685673	Surface Water	4.78117	0.013295	0.890454	0.404933	940198	1240	0.955596	0.779535	9.74817	5.06086
SRR5306404	Surface Water	4.82116	0.137972	0.586371	1.09808	543579	1196	3.51676	1.27775	16.8399	5.54586
SRR5306407	Surface Water	4.66794	0.142766	0.582064	1.09107	525327	1140	3.53175	1.29864	16.884	5.33643
SRR5306409	Surface Water	4.14506	0.120592	0.618593	1.03678	642654	1219	3.43294	1.3056	15.7071	5.49352
SRR5306410	Surface Water	4.28825	0.132737	0.558232	1.07859	546186	1063	3.56038	1.31557	17.1056	5.3228
SRR6262235	Surface Water	3.18235	0.001593	0.661671	0.440156	1569051	724	1.78292	1.01461	16.0461	6.26989
SRR6262236	Surface Water	2.76594	0.001831	0.729988	0.405708	1365711	783	1.26138	0.968188	13.8034	5.76866
SRR6262237	Surface Water	3.20901	0.010789	0.660464	0.434417	1621975	743	1.45384	1.03459	16.4097	6.40917
SRR6262238	Surface Water	3.21567	0.009611	0.74173	0.402542	1300550	986	1.68533	1.03733	15.9523	5.97907
SRR6262239	Surface Water	2.90919	0.003229	0.688599	0.4233	1548316	781	1.21899	1.08578	23.4703	5.36385
SRR6262240	Surface Water	2.88921	0.002213	0.789068	0.425162	1129847	906	1.14497	1.10925	31.9032	4.55037
SRR6262241	Surface Water	3.44553	0.007387	0.686298	0.500733	1353760	785	1.35857	0.964155	15.5052	6.37675
SRR6262242	Surface Water	3.08578	0	0.813298	0.482932	961031	948	1.08985	0.885387	13.6128	5.9148
SRR6262243	Surface Water	3.4755	0.008098	0.66757	0.416616	1543574	740	1.82788	1.01576	15.7772	6.57733
SRR6262244	Surface Water	3.46888	0	0.802088	0.451086	1129807	1001	1.27195	0.908965	14.4183	6.22169
SRR6262245	Surface Water	2.81259	0.002048	0.760614	0.3879	1220912	857	1.08088	0.853446	11.487	5.49492
SRR6262246	Surface Water	3.24233	0	0.773556	0.426839	1181010	999	1.36979	0.926912	12.7624	5.80511
SRR8164872	Surface Water	2.1229	0.005258	0.676015	0.341424	475505	985	1.78259	0.953504	15.4972	6.74643
SRR8164873	Surface Water	3.24233	0.016592	0.608506	0.570579	452037	921	2.25427	1.0224	13.2719	5.91646
SRR8571164	Surface Water	4.31815	0.009763	0.576011	0.47149	1536355	508	2.31107	0.993315	12.979	5.35993
SRR8571165	Surface Water	4.09167	0.01882	0.668443	0.441423	1195550	464	2.80439	1.08842	13.4469	6.23598
SRR8571166	Surface Water	6.21958	0.010546	0.824159	0.608377	1185337	806	2.05675	0.905485	14.3108	4.9251
SRR8571168	Surface Water	5.55695	0.015027	0.561447	0.548319	1663646	551	2.77428	0.988166	14.909	5.62539
SRR8571170	Surface Water	6.04308	0.01248	0.810418	0.587494	1001577	783	1.9629	0.897404	15.0609	3.65776
SRR8571171	Surface Water	5.82331	0.010766	0.697294	0.550082	1857636	676	1.94566	0.908346	13.4815	4.40347
SRR8942242	Surface Water	4.87439	0.042437	0.703721	0.822761	2238622	766	2.36051	1.02817	26.911	5.29845
SRR8942247	Surface Water	4.25154	0.005781	0.683683	0.53312	3459618	665	1.76054	0.967638	18.5299	4.73293
SRR8942248	Surface Water	4.57126	0.023117	0.669336	0.594558	3352439	673	1.93933	0.991172	20.0696	4.7388
SRR8942249	Surface Water	3.50545	0.011175	0.698164	0.478317	2908197	642	2.10856	1.02346	17.2797	4.38648
SRR8942250	Surface Water	4.26821	0.005138	0.764552	0.54672	2433045	803	1.70475	1.04631	23.7837	5.63493
SRR8942251	Surface Water	4.74112	0.005334	0.694863	0.53619	2812060	725	1.72781	0.990273	19.73	4.92127
SRR8942254	Surface Water	3.11907	0.002665	0.810222	0.451224	1876275	901	1.33965	0.97522	14.849	5.03602
SRR8942256	Surface Water	3.70864	0.015725	0.701113	0.497648	3338548	644	2.25563	1.0615	18.6128	4.15809
SRR8942257	Surface Water	4.83436	0.00689	0.664512	0.591301	2902847	733	1.54119	0.967895	19.0719	5.11189
SRR8942258	Surface Water	5.47039	0.004568	0.695819	0.634228	2736368	716	1.46138	0.940374	19.2688	4.79582
SRR8942265	Surface Water	4.81771	0.063623	0.592318	0.877198	2829164	688	2.44012	1.09546	28.0299	5.03651
SRR8942266	Surface Water	5.55695	0.013474	0.557296	0.705133	2597507	784	2.26162	1.01731	21.2953	5.20893
SRR8942298	Surface Water	3.53877	0.082691	0.681334	0.86588	2479084	647	2.31816	1.16045	38.6554	5.61236
SRR8942301	Surface Water	5.29058	0.08691	0.711238	1.01935	3365527	648	2.87117	1.17773	31.0966	4.7013
SRR8942303	Surface Water	3.60539	0.061585	0.718861	0.684789	2922750	648	2.51486	1.17343	25.7112	5.34758
SRR8942304	Surface Water	3.85186	0.05253	0.703967	0.70515	2807893	645	2.17422	1.13488	25.4576	5.02979
SRR8942308	Surface Water	4.65119	0.009865	0.701973	0.578512	3294507	773	1.3444	0.899264	17.7381	4.74771
SRR8942310	Surface Water	3.32891	0.009084	0.562778	0.444587	2752183	677	1.76752	0.984346	15.5443	5.42663
SRR8942311	Surface Water	5.12742	0.018226	0.789377	0.439028	1920290	729	1.48362	0.991481	19.5434	4.27361
SRR8942315	Surface Water	2.60933	0.009456	0.661386	0.368617	3172421	699	1.57721	0.983557	13.7134	5.45786
SRR8942316	Surface Water	5.9532	0.010759	0.737903	0.551912	2091258	779	1.02799	0.897434	17.7055	4.3715
SRR9030900	Surface Water	4.09514	0.143792	0.768601	1.23469	660665	1410	3.35595	1.68301	23.3922	5.69423
SRR9030901	Surface Water	4.18844	0.161027	0.694797	1.59572	760727	1289	3.62165	1.70574	24.6763	4.97418
SRR9030902	Surface Water	5.13433	0.296106	0.727719	1.5755	641642	1024	3.29138	1.67551	24.1485	3.62749
SRR9030903	Surface Water	3.42557	0.123429	0.699431	1.1421	850681	1128	3.25844	1.46733	15.0616	6.02906
SRR9030904	Surface Water	4.42487	0.212098	0.824075	1.22414	471471	1403	3.22451	1.67042	41.089	2.73732
SRR9030905	Surface Water	4.88115	0.155653	0.679391	1.79464	786994	1054	3.78704	1.51163	20.3322	5.46729
SRR9030906	Surface Water	4.76467	0.164612	0.740922	2.05493	728978	1097	3.69986	1.50603	28.8128	4.12824
SRR9030907	Surface Water	3.81868	0.210555	0.739953	1.58856	688639	1223	3.54884	1.59417	21.1901	5.16624
SRR9030908	Surface Water	4.90454	0.239997	0.581294	1.92541	822905	957	3.64102	1.4979	19.7996	5.98153
SRR9030909	Surface Water	5.09106	0.404029	0.743732	1.60825	544491	943	3.17814	1.65506	26.4577	3.64176
SRR9030910	Surface Water	3.74543	0.134	0.656224	1.28329	802225	1086	3.48111	1.50121	16.4078	5.83267
SRR9030911	Surface Water	3.71879	0.221065	0.700064	1.53695	848146	1267	3.43965	1.44593	19.62	6.07059
SRR9030912	Surface Water	3.74872	0.258224	0.716729	1.41622	697048	1187	3.29772	1.51498	18.4411	5.6527
ERR1713334	Wastewater Influent	11.9764	0.234532	0.641029	4.57637	1183174	615	4.5303	1.50284	224.979	4.5802
ERR1713335	Wastewater Influent	12.8109	0.247637	0.70851	4.53447	1221514	648	4.41151	1.34272	155.299	4.00097
ERR1713336	Wastewater Influent	14.7165	0.427071	0.768123	5.37132	819500	641	4.33664	1.34538	159.241	4.05599
ERR1713337	Wastewater Influent	6.9321	0.185844	0.604798	3.47409	1829452	593	4.2872	1.51559	54.2995	6.26433
ERR1713338	Wastewater Influent	10.4266	0.35812	0.60864	6.0625	1095959	649	4.66403	1.5064	141.252	6.12198
ERR1713341	Wastewater Influent	14.384	0.366751	0.692385	4.79084	838416	608	4.66147	1.49522	175.678	4.65512
ERR1713342	Wastewater Influent	10.8221	0.159728	0.731645	2.74078	1784247	670	4.46227	1.44065	124.162	5.30825
ERR1713344	Wastewater Influent	5.9899	0.142247	0.508123	2.30265	3145888	598	4.72099	1.53657	67.2297	6.38976
ERR1713345	Wastewater Influent	10.9256	0.372594	0.637387	5.44077	1442538	619	4.68182	1.53669	106.231	5.439
ERR1713347	Wastewater Influent	12.1193	0.250426	0.767177	3.32889	1227877	647	4.21897	1.36757	105.084	5.01353
ERR1713349	Wastewater Influent	9.55794	0.181091	0.685076	2.73483	2498698	659	4.62573	1.44318	112.876	5.21085
ERR1713350	Wastewater Influent	10.6758	0.177348	0.745133	2.85975	2424564	689	4.54697	1.48637	133.259	4.78973
ERR1713351	Wastewater Influent	9.9207	0.214479	0.596992	3.10262	1515267	592	4.61397	1.54564	137.205	5.10305
ERR1713353	Wastewater Influent	7.88103	0.326452	0.518809	5.27218	1033807	552	4.92633	1.54173	141.179	5.76267
ERR1713354	Wastewater Influent	14.826	0.416354	0.628503	4.477	834592	582	4.69189	1.43146	158.429	4.81847
ERR1713355	Wastewater Influent	11.634	0.323971	0.785179	4.13678	1875108	658	4.71564	1.51034	127.908	4.50212
ERR1713356	Wastewater Influent	12.0463	0.303272	0.617493	3.67526	1187013	605	4.61458	1.4994	143.337	5.14165
ERR1713357	Wastewater Influent	23.3001	0.175378	0.827519	6.85594	898041	789	3.93986	1.14984	137.796	2.50164
ERR1713358	Wastewater Influent	5.39726	0.17255	0.78775	2.11355	1666157	773	4.11772	1.61155	42.656	5.84621
ERR1713359	Wastewater Influent	11.2847	0.198948	0.91505	4.24759	980136	569	3.68555	1.19128	89.9236	1.51133
ERR1713362	Wastewater Influent	8.28727	0.25997	0.586996	4.73263	2096349	645	4.82318	1.53082	116.109	5.60963
ERR1713363	Wastewater Influent	14.3771	0.243975	0.754562	5.99214	1434533	694	4.26813	1.36147	208.51	3.86784
ERR1713364	Wastewater Influent	10.9653	0.307756	0.730619	5.51808	1137222	623	4.41255	1.47648	160.561	4.05539
ERR1713365	Wastewater Influent	13.4059	0.270107	0.768835	4.29553	823722	626	4.30462	1.31572	134.129	3.82576
ERR1713367	Wastewater Influent	7.57442	0.127282	0.69158	3.42773	3083665	591	4.30221	1.28708	120.075	4.46219
ERR1713368	Wastewater Influent	11.3346	0.272175	0.789601	4.1028	1901295	649	4.60154	1.38529	132.374	4.0692
ERR1713369	Wastewater Influent	10.6593	0.312799	0.658677	5.08286	1894130	609	4.6137	1.48573	126.684	4.89887
ERR1713370	Wastewater Influent	6.47616	0.234735	0.67353	5.72496	1767910	694	4.51574	1.46521	86.4313	5.30225
ERR1713371	Wastewater Influent	24.639	0.473871	0.918073	8.88369	838801	740	3.90274	1.23566	114.264	1.20066
ERR1713372	Wastewater Influent	10.9419	0.236233	0.694277	4.69789	2010675	630	4.45336	1.50124	180.982	4.51215
ERR1713374	Wastewater Influent	15.5171	0.26602	0.7575	7.33486	1108912	619	4.0164	1.25333	207.088	3.35559
ERR1713375	Wastewater Influent	10.9885	0.307712	0.672031	4.18458	1113015	628	4.53603	1.49194	165.123	4.4299
ERR1713376	Wastewater Influent	16.0559	0.430051	0.680983	6.46283	1180039	636	4.78329	1.45761	156.914	4.62703
ERR1713378	Wastewater Influent	8.67645	0.378288	0.578119	5.84244	1275435	609	4.65432	1.62083	107.233	5.61451
ERR1713380	Wastewater Influent	10.6457	0.152328	0.707367	3.2232	1509873	702	4.2738	1.39746	131.175	4.40097
ERR1713381	Wastewater Influent	6.40624	0.180935	0.631529	3.57706	2542305	625	4.17342	1.20591	150.348	5.20075
ERR1713382	Wastewater Influent	14.3899	0.134766	0.849285	3.30809	2151842	706	3.93417	1.27894	84.3066	2.75723
ERR1713383	Wastewater Influent	7.34163	0.244472	0.543276	2.72314	1503204	614	4.58415	1.47197	116.967	5.9947
ERR1713384	Wastewater Influent	7.33174	0.231726	0.63151	4.70699	2880492	629	4.77142	1.47232	110.663	5.81344
ERR1713385	Wastewater Influent	9.70471	0.34048	0.677276	6.90639	1571254	620	4.60408	1.52831	164.54	5.29805
ERR1713386	Wastewater Influent	18.4318	0.404656	0.838102	7.76136	1791574	654	4.29004	1.23009	164.305	2.32534
ERR1713387	Wastewater Influent	9.94083	0.322249	0.587871	3.63851	1248991	628	4.87056	1.57491	104.356	5.62785
ERR1713388	Wastewater Influent	12.1928	0.317501	0.729301	5.53289	1173184	640	4.25714	1.43295	206.932	4.28342
ERR1713389	Wastewater Influent	10.7091	0.230382	0.620228	3.96842	1323860	621	4.57316	1.49913	156.861	4.88686
ERR1713390	Wastewater Influent	8.55987	0.190909	0.703239	3.59053	1767818	670	4.35927	1.49887	148.949	5.11328
ERR1713391	Wastewater Influent	10.0006	0.177648	0.672297	2.82973	2336040	641	4.592	1.51082	133.964	5.18367
ERR1713392	Wastewater Influent	12.2889	0.190713	0.688987	3.76346	1533683	663	4.31748	1.41984	171.967	4.46987
ERR1713394	Wastewater Influent	9.47196	0.351084	0.901417	2.95429	1452597	1143	4.32236	1.63788	47.1244	4.8877
ERR1713395	Wastewater Influent	18.7162	0.19726	0.839208	5.74279	1356046	823	4.17052	1.26661	128.13	3.10716
ERR1713396	Wastewater Influent	11.4114	0.33388	0.737649	8.25161	2433431	674	4.64995	1.51897	172.321	4.55094
ERR1713397	Wastewater Influent	7.17845	0.15787	0.611599	2.49795	2517847	605	4.56885	1.47355	105.899	6.01342
ERR1713398	Wastewater Influent	9.89728	0.17558	0.630832	4.14659	1366875	613	4.5237	1.51851	191.379	4.92385
ERR1713399	Wastewater Influent	6.92535	0.181379	0.433915	1.78558	1171553	529	4.56728	1.47195	74.9953	6.28806
ERR1713400	Wastewater Influent	11.0589	0.360456	0.695062	3.7753	1206762	650	4.69818	1.5769	145.944	5.20243
ERR1713401	Wastewater Influent	11.5977	0.267739	0.642363	5.15485	1307205	617	4.68052	1.52217	218.705	4.98233
ERR1713402	Wastewater Influent	12.4963	0.32974	0.682319	5.14167	993175	640	4.70967	1.57956	183.377	4.96455
ERR1713405	Wastewater Influent	10.2833	0.221394	0.739088	3.10763	2789071	670	4.687	1.53884	117.963	5.25882
ERR1713406	Wastewater Influent	8.78614	0.261182	0.755078	3.04816	1588884	763	4.41539	1.45714	106.748	5.83325
ERR1713407	Wastewater Influent	23.0593	0.392895	0.863763	9.05648	1972455	724	4.63625	1.30167	132.167	2.74896
ERR1713408	Wastewater Influent	11.4147	0.263554	0.77395	7.93605	1489211	684	4.07249	1.3651	261.477	3.8299
ERR1713409	Wastewater Influent	11.7508	0.412284	0.668358	4.3011	951971	639	4.80924	1.51787	154.72	5.40964
ERR1713410	Wastewater Influent	10.33	0.327826	0.596551	4.57664	1464148	624	4.83388	1.60259	159.165	5.43464
ERR1713411	Wastewater Influent	11.1817	0.357612	0.561476	4.85638	1139463	580	4.88184	1.58796	140.589	5.20295
ERR1725942	Wastewater Influent	18.0001	0.535122	0.752356	5.57215	1401469	678	4.72085	1.48423	178.023	4.98102
ERR1725947	Wastewater Influent	16.5767	0.285401	0.699951	5.43778	840896	654	4.3932	1.32343	170.727	3.92633
ERR1725950	Wastewater Influent	7.30499	0.210271	0.640876	3.92255	1319694	672	4.20697	1.47666	59.4508	6.33842
ERR1725969	Wastewater Influent	10.0341	0.299953	0.761843	3.34839	1033463	889	4.34723	1.42375	112.44	5.77185
ERR1725970	Wastewater Influent	9.77793	0.28818	0.752863	3.39894	988932	885	4.35876	1.42677	113.346	5.77829
ERR1725974	Wastewater Influent	28.6388	0.130369	0.825499	8.40557	786217	717	3.93484	1.13883	141.46	2.38584
ERR1725979	Wastewater Influent	19.317	0.262002	0.733368	6.98422	954163	675	4.22283	1.30731	209.555	3.68854
ERR1725985	Wastewater Influent	13.2334	0.43449	0.617704	5.73729	874547	593	4.63177	1.46617	136.59	4.87017
ERR1725988	Wastewater Influent	18.8259	0.259452	0.786348	8.65061	1011718	625	3.99636	1.29773	219.025	3.16667
ERR1725992	Wastewater Influent	19.6137	0.501405	0.714881	7.78019	1081903	684	4.72247	1.43388	164.642	4.59486
ERR1725997	Wastewater Influent	4.26157	0.094888	0.563627	1.11524	1211941	603	4.01514	1.43471	49.1282	6.36899
ERR1725998	Wastewater Influent	4.3182	0.101281	0.559671	1.11402	1258859	591	4.08991	1.45851	50.7742	6.3615
ERR1726005	Wastewater Influent	15.7363	0.193173	0.686856	4.88822	996490	691	4.22597	1.38207	178.891	4.31269
ERR1726013	Wastewater Influent	12.5723	0.338823	0.671832	4.40284	745199	681	4.64545	1.58865	153.808	5.28262
ERR1726016	Wastewater Influent	13.6334	0.300983	0.627003	5.62088	797367	655	4.68501	1.52057	219.225	4.95174
ERR1726033	Wastewater Influent	11.6973	0.311208	0.692517	5.81322	1847578	672	4.82681	1.56105	151.755	5.26303
ERR2592244	Wastewater Influent	16.4507	0.304314	0.691022	7.1902	994008	630	4.07093	1.32043	212.915	3.59703
ERR2592245	Wastewater Influent	14.2738	0.28749	0.714956	4.65871	782608	622	4.24178	1.2405	162.063	3.81349
ERR2592246	Wastewater Influent	12.1226	0.233488	0.649306	4.58658	1027864	617	4.49604	1.49851	227.35	4.55005
ERR2592247	Wastewater Influent	13.0435	0.278694	0.702191	4.52087	1022591	644	4.4131	1.3555	158.845	3.97504
ERR2592248	Wastewater Influent	14.8262	0.541869	0.759226	5.5147	655106	637	4.31679	1.37748	168.643	4.00907
ERR2592249	Wastewater Influent	10.227	0.363885	0.578244	5.98299	1009901	649	4.65951	1.51612	140.969	6.1416
ERR2592250	Wastewater Influent	12.808	0.274126	0.817463	4.61959	2717652	651	4.63234	1.48311	169.384	4.64146
ERR2592252	Wastewater Influent	10.5097	0.386071	0.62386	5.44345	1243240	622	4.6702	1.53893	105.148	5.41666
ERR2592253	Wastewater Influent	13.0338	0.291831	0.722867	3.19847	770970	669	4.20102	1.36111	102.58	4.98675
ERR2592255	Wastewater Influent	11.8467	0.305777	0.591838	3.63732	1071004	616	4.61506	1.5052	145.222	5.12028
ERR2592256	Wastewater Influent	24.5243	0.17498	0.829361	6.92116	742929	754	3.93204	1.21063	152.948	2.57785
ERR2592258	Wastewater Influent	8.4937	0.293575	0.5309	4.65278	1260290	623	4.81828	1.52875	120.251	5.49531
ERR2592259	Wastewater Influent	10.6493	0.329113	0.711031	5.46204	1086215	619	4.38037	1.49496	164.971	4.00368
ERR2592260	Wastewater Influent	13.2729	0.257642	0.761514	4.24257	766549	628	4.28672	1.38837	147.813	3.79067
ERR2592263	Wastewater Influent	11.1848	0.311907	0.691703	4.20698	1090032	629	4.50802	1.48168	164.917	4.39213
ERR2592264	Wastewater Influent	11.7536	0.390343	0.572265	4.36853	1242450	594	4.90646	1.58937	138.645	5.13647
ERR2592265	Wastewater Influent	9.38857	0.532587	0.566694	5.99481	821419	599	4.63414	1.60342	111.939	5.52507
ERR2592266	Wastewater Influent	4.24491	0.098642	0.495708	0.892198	1824766	535	4.33091	1.47716	50.1428	6.16632
ERR2592267	Wastewater Influent	10.4029	0.154285	0.659105	3.01109	1166649	687	4.2641	1.40582	128.492	4.37768
ERR2592268	Wastewater Influent	7.27502	0.257634	0.498412	2.64907	1164411	602	4.53047	1.45211	119.015	5.95545
ERR2592269	Wastewater Influent	10.7991	0.392113	0.58165	3.64249	956319	623	4.8641	1.57571	105.777	5.58519
ERR2592273	Wastewater Influent	19.8283	0.213593	0.755388	5.57699	725662	745	4.17312	1.29202	132.529	3.09124
ERR2592274	Wastewater Influent	9.94393	0.190469	0.641458	4.22094	1063141	606	4.53513	1.50628	200.926	4.88629
ERR2592277	Wastewater Influent	12.3229	0.301842	0.640676	5.10724	944175	614	4.6492	1.51131	231.841	4.91781
ERR2592278	Wastewater Influent	12.6592	0.372771	0.675693	4.93196	992524	649	4.69051	1.56104	176.274	4.92205
ERR2592279	Wastewater Influent	9.98399	0.289668	0.653161	2.58146	906180	696	4.66963	1.47485	118.854	5.50229
ERR2592280	Wastewater Influent	11.1319	0.358329	0.615781	3.66484	1248801	610	4.83794	1.55734	153.586	5.06736
ERR2592282	Wastewater Influent	11.062	0.422671	0.589638	4.65076	1040951	604	4.83587	1.60078	164.032	5.39942
ERR2592283	Wastewater Influent	9.97389	0.281648	0.671832	4.92661	2902473	644	4.87725	1.57525	137.656	5.16632
ERR2592328	Wastewater Influent	11.3179	0.271994	0.504937	3.81354	643375	530	4.39667	1.30695	135.907	4.638
ERR2592329	Wastewater Influent	11.0251	0.225604	0.727907	3.50489	1883790	620	4.57864	1.51254	119.858	5.22345
ERR2592332	Wastewater Influent	11.3711	0.338016	0.627166	3.42186	880104	590	4.7005	1.55858	128.904	5.47307
ERR2592334	Wastewater Influent	9.89748	0.268894	0.671964	3.15648	1292291	677	4.58617	1.46542	115.09	5.78322
ERR2592337	Wastewater Influent	12.0498	0.390621	0.616355	4.4451	972773	595	4.88725	1.58403	139.746	5.21246
ERR2592338	Wastewater Influent	3.70533	0.068572	0.527319	0.858314	2989533	568	4.34009	1.47349	44.1029	6.33523
ERR2592342	Wastewater Influent	11.5143	0.406802	0.581554	3.87155	983235	563	4.88922	1.55136	155.074	5.26005
ERR2592343	Wastewater Influent	10.5961	0.305584	0.66227	4.68317	1783414	601	4.89649	1.59183	138.523	5.24828
ERR3220178	Cow Manure	3.41559	0.056885	0.671556	0.954556	3076368	756	2.13141	0.904279	55.8011	3.88927
ERR3220183	Cow Manure	3.54882	0.056106	0.684347	0.771193	3430979	745	2.07828	0.878448	53.9222	3.78627
ERR3220184	Cow Manure	3.65211	0.054557	0.697143	0.847852	3115976	776	2.12205	0.876308	55.7673	3.68936
ERR3220203	Cow Manure	2.90587	0.055673	0.759254	0.905314	2335033	769	1.93974	1.00531	56.3698	2.65414
ERR3220204	Cow Manure	3.77202	0.07623	0.675067	1.00364	2853193	760	2.11747	0.835444	59.4583	3.83873
ERR3220205	Cow Manure	3.64875	0.069158	0.639361	0.858644	3831797	722	2.08346	0.82278	51.5939	4.20844
ERR3220206	Cow Manure	3.47556	0.056456	0.726306	0.891102	2701189	832	2.09131	0.913702	51.8432	3.82944
ERR3220207	Cow Manure	3.64209	0.048921	0.623813	0.840055	3628264	722	2.03035	0.814785	49.6496	4.3832
ERR3220208	Cow Manure	3.772	0.061198	0.643926	1.02515	3553998	745	2.03883	0.848771	52.1182	4.15001
ERR3220209	Cow Manure	3.41889	0.054808	0.724196	0.85777	3010465	769	2.09112	0.949762	51.5854	3.31061
ERR3220210	Cow Manure	3.32895	0.05398	0.746119	0.865471	2732484	758	2.14279	1.00614	53.7853	3.10803
ERR3220211	Cow Manure	3.77866	0.058345	0.669317	1.00794	3127897	769	1.95892	0.821112	52.2662	4.20985
ERR3220212	Cow Manure	3.75208	0.064162	0.751004	0.994799	2259869	830	2.05038	0.940732	61.7977	3.44789
ERR3220213	Cow Manure	3.93855	0.054109	0.685483	0.874543	3234179	770	2.03686	0.843128	54.8631	4.14848
ERR3220214	Cow Manure	3.70873	0.056223	0.670133	0.910989	3512752	747	2.11621	0.844052	56.5165	4.17451
ERR3220216	Cow Manure	3.65875	0.082508	0.65901	1.00851	3302688	758	2.06958	0.827455	56.5046	4.21598
ERR3220218	Cow Manure	3.97196	0.118462	0.828598	1.00894	1561657	1010	2.18225	0.961511	70.2628	2.86461
ERR3220219	Cow Manure	3.65542	0.054956	0.621165	0.784832	3821243	701	2.06782	0.818462	50.8309	4.21335
ERR3220220	Cow Manure	3.36893	0.051453	0.651058	0.849803	3401124	734	2.08502	0.831107	54.7211	4.04288
ERR5671698	Cow Manure	4.02851	0.061832	0.737527	0.602525	1536418	822	2.11494	0.887438	39.3908	4.03375
ERR5671704	Cow Manure	4.11846	0.067162	0.764121	0.580469	1563368	857	2.0018	0.898117	40.3991	3.67737
ERR5671705	Cow Manure	7.74171	0.181506	0.933616	0.938324	399425	1532	1.95828	1.13815	77.7286	3.5208
ERR5671706	Cow Manure	10.0928	0.515697	0.977525	1.14459	184206	5010	2.33188	1.16853	82.2828	3.32069
ERR5671722	Cow Manure	11.7526	0.634135	0.975995	13.1196	165574	3052	3.93923	1.22356	131.12	2.70633
ERR5683758	Cow Manure	3.85865	0.095935	0.715513	1.09117	1537479	835	1.9784	0.861886	55.567	4.00452
ERR5683760	Cow Manure	6.08704	0.218425	0.923619	1.68172	400586	1278	1.96263	1.00169	78.4271	3.20706
SRR10098297	Cow Manure	5.65691	0.119628	0.547301	1.07011	3051093	605	2.54653	0.806323	56.8048	5.59405
SRR10098298	Cow Manure	5.8001	0.19981	0.464869	1.34062	1901753	541	2.9174	1.0161	43.1032	5.4238
SRR10098299	Cow Manure	6.48927	0.196668	0.488038	1.64692	1779606	558	3.27682	1.18514	48.7369	5.90629
SRR10098300	Cow Manure	6.05653	0.201535	0.517837	1.61475	1662202	570	3.19151	1.03595	57.5804	5.59354
SRR10098306	Cow Manure	6.55914	0.157962	0.469974	1.41211	2120722	591	3.36446	1.2625	42.5003	6.20162
SRR10098317	Cow Manure	4.56129	0.115431	0.50673	1.06601	2468962	578	2.51037	0.803596	42.0425	5.93718
SRR10098322	Cow Manure	5.59699	0.144896	0.451776	1.38362	2622538	588	3.1028	1.11118	46.845	5.99605
SRR10098324	Cow Manure	5.73015	0.169308	0.442756	1.16522	1742346	550	3.10862	1.10632	45.1446	5.81937
SRR10765500	Cow Manure	3.87195	0.176199	0.705195	2.01349	1191802	692	1.96905	1.01722	71.7774	3.3235
SRR10765501	Cow Manure	3.17242	0.105409	0.655986	2.00152	1423009	632	1.98871	0.953589	71.3491	3.4677
SRR10765502	Cow Manure	3.16906	0.092092	0.607787	1.76662	1438765	593	1.94032	1.00145	59.8371	3.61435
SRR10765503	Cow Manure	2.85923	0.10087	0.652828	1.94525	1288767	617	1.72001	1.05089	67.3977	3.09762
SRR10765504	Cow Manure	3.90867	0.139208	0.839561	2.2491	664463	921	1.87192	1.10717	79.3899	2.5446
SRR10765505	Cow Manure	3.63874	0.117128	0.638436	2.01291	1622126	600	2.0823	0.967149	68.0549	3.73422
SRR10765506	Cow Manure	3.46554	0.109799	0.604376	2.32344	1821484	568	2.04615	0.906478	72.8471	4.11815
SRR10765507	Cow Manure	3.45222	0.105199	0.650725	1.82971	1354562	593	2.03192	1.00526	64.3183	3.45221
SRR11038085	Cow Manure	4.2784	0.121578	0.84701	1.88363	1542195	904	1.74713	0.942109	79.1373	2.98379
SRR13343629	Cow Manure	5.09082	0.055364	0.661319	1.13126	2257774	637	2.31805	0.732569	53.3711	5.80357
SRR13343630	Cow Manure	5.44711	0.06542	0.682632	1.11331	2178215	680	2.33325	0.674755	59.3891	5.90626
SRR13343631	Cow Manure	5.5304	0.075895	0.708085	1.07873	2108159	674	2.25471	0.647383	61.8191	5.54907
SRR13343632	Cow Manure	5.02755	0.075021	0.599909	1.08208	2232677	672	2.28437	0.67232	62.6671	5.6396
SRR13343633	Cow Manure	4.921	0.074162	0.724488	1.12139	2191134	686	2.25949	0.726657	61.6814	4.96507
SRR13343634	Cow Manure	4.96097	0.081441	0.672524	1.16307	2240864	667	2.33491	0.703598	58.3151	5.68475
SRR13343635	Cow Manure	5.16407	0.068792	0.689914	1.11233	2434842	673	2.33035	0.712515	55.058	5.79326
SRR13343636	Cow Manure	5.56034	0.07597	0.689488	1.20382	2533878	678	2.40601	0.731109	55.108	5.81207
SRR13343637	Cow Manure	5.24732	0.068409	0.690662	1.09754	2521568	660	2.30305	0.687998	55.327	5.6461
SRR14423985	Cow Manure	0.149998	0.005057	0.91552	5.75784	2471922	800	3.8117	1.202	107.406	2.8052
SRR14423987	Cow Manure	4.28225	0.099647	0.995081	2.50629	100353	644	2.14909	1.24675	615.922	1.91917
SRR14423989	Cow Manure	0.0133333	0	0.884343	4.07786	1911254	632	3.71382	1.25757	86.4471	2.97205
SRR14423990	Cow Manure	0.0699996	0.001422	0.90353	3.84635	1757511	643	3.46805	1.37745	97.2456	2.93157
SRR14423991	Cow Manure	0.0999991	0.010865	0.970212	4.33289	1380599	499	2.9821	1.10171	92.9388	2.8236
SRR14423992	Cow Manure	0.116665	0.01165	0.850492	3.94534	2360598	834	3.36607	1.06508	110.816	3.05217
SRR14423995	Cow Manure	0.0966659	0.015792	0.970616	5.10885	1108188	475	3.21888	1.07908	113.167	2.86179
SRR14423999	Cow Manure	0.263327	0.006002	0.871629	4.00199	833061	437	3.53534	1.58834	84.3174	3.1859
SRR14424000	Cow Manure	0.0366666	0.003068	0.857413	5.09487	1629474	530	3.58272	1.23861	89.3081	3.33041
SRR14424001	Cow Manure	0.139998	0.004409	0.879727	4.96625	1134089	469	3.88343	1.23945	95.6048	3.29753
SRR14424002	Cow Manure	0.103332	0.001017	0.890592	3.87935	2458957	864	3.626	1.26356	92.9323	2.75543
SRR14424003	Cow Manure	0.0566663	0.008661	0.873064	6.06604	577309	417	3.54197	1.11876	100.878	3.38039
SRR14424005	Cow Manure	0.0566664	0	0.91717	1.61581	1614916	664	2.70927	1.2263	451.713	2.69918
SRR14424006	Cow Manure	0.0333333	0.006323	0.88278	7.5367	1977032	654	2.96057	1.11963	114.322	2.8863
SRR14424009	Cow Manure	0.0166666	0.001601	0.868489	4.60415	1561231	530	3.53936	1.21299	78.349	3.20083
SRR14424010	Cow Manure	0.0699995	0.003611	0.949814	4.82096	2077057	670	3.7404	1.22244	110.413	2.71015
SRR14424011	Cow Manure	0.0666662	0	0.905597	4.49231	2346548	794	3.59364	1.31088	118.454	2.77756
SRR17191898	Cow Manure	5.79332	0.0331	0.563782	0.90135	2567978	728	2.67845	0.990741	22.3352	6.41774
SRR17191900	Cow Manure	6.02971	0.045095	0.465772	0.881539	2882754	612	2.98767	0.992928	24.106	6.58882
SRR17191903	Cow Manure	6.82867	0.042671	0.437216	0.95532	2402093	588	2.92639	0.941274	23.9861	6.36221
SRR17191907	Cow Manure	6.75219	0.06248	0.570174	1.00237	2040650	727	3.11362	1.08395	28.1855	6.42444
SRR22328605	Cow Manure	4.46138	0.034284	0.578918	0.668102	3645973	597	2.00111	0.688878	35.8987	6.09022
SRR6425778	Cow Manure	4.31492	0.03109	0.350093	0.957624	482469	757	1.9769	0.838401	16.9293	6.37549
SRR6425779	Cow Manure	3.53877	0.02961	0.332781	0.798019	506590	723	1.81088	0.719661	14.4243	6.28321
SRR6425780	Cow Manure	3.62205	0.03131	0.345308	0.827022	718616	677	1.865	0.741583	14.1761	6.31462
SRR6425781	Cow Manure	3.49881	0.043141	0.426395	0.81121	927192	739	1.84142	0.756942	14.8795	6.3053
SRR6425814	Cow Manure	3.69869	0.034218	0.352534	0.811136	584492	694	1.85721	0.756309	14.683	6.1911
SRR6425815	Cow Manure	3.41221	0.041715	0.402702	0.779201	779093	784	1.91258	0.759464	14.9732	6.25045
SRR7686593	Cow Manure	4.40485	0.239198	0.725637	1.52454	627078	554	1.51484	0.783943	52.9225	1.91125
SRR7686596	Cow Manure	3.81195	0.355171	0.498246	1.38362	851661	507	1.71829	0.716201	42.2104	5.14399
SRR7686597	Cow Manure	3.93852	0.399258	0.762452	1.43547	1947254	554	1.69285	0.551666	65.4449	4.29654
SRR7686600	Cow Manure	3.54213	0.320378	0.670826	1.28877	1857096	565	1.69527	0.593209	56.062	4.33599
SRR7686601	Cow Manure	4.66795	0.287199	0.548443	1.76557	1366599	618	2.11144	0.673087	58.0062	5.249
SRR7686604	Cow Manure	3.96183	0.10006	0.573825	1.50143	1249235	556	1.77821	0.697868	50.4166	4.69019
SRR8591572	Cow Manure	2.76927	0.053236	0.520403	0.928215	1737533	677	2.18222	0.924702	38.9806	3.4924
SRR8591573	Cow Manure	2.73594	0.067607	0.54763	0.926193	1774948	707	2.14933	0.948871	39.526	3.40026
SRR8591574	Cow Manure	2.96914	0.073267	0.556185	0.937483	1910798	714	2.12982	0.9322	38.8679	3.39882
SRR8591575	Cow Manure	2.81924	0.075111	0.555692	0.942514	1797311	721	2.12798	0.950946	38.6703	3.44118
SRR8591576	Cow Manure	2.7326	0.055513	0.570261	0.928585	1846392	727	2.15197	0.938364	40.2352	3.28919
SRR8591577	Cow Manure	2.92251	0.053135	0.589254	0.930244	1740828	714	2.15518	0.958445	43.2148	2.92956
SRR8591578	Cow Manure	3.12241	0.038178	0.675323	1.47285	1375132	772	2.29101	1.01325	64.4148	2.72782
SRR8591579	Cow Manure	3.09575	0.041829	0.618507	1.47389	1553921	749	2.03029	1.06897	61.0759	2.4733
SRR8591580	Cow Manure	3.28896	0.056059	0.65179	1.54991	1650028	719	2.37378	1.05479	56.712	2.91786
SRR8591581	Cow Manure	3.25901	0.065916	0.666022	1.36807	1668777	761	2.34897	1.01061	60.3688	3.00263
SRR8591583	Cow Manure	3.24899	0.061329	0.669013	1.39731	1426716	757	2.26948	1.00986	59.8204	2.84387
ERR1135285	Pig Feces	4.53162	0.148359	0.67667	4.58188	674029	1331	2.97194	1.00023	38.8252	4.15389
ERR1135286	Pig Feces	4.71816	0.167169	0.688608	4.14183	732776	1342	2.94872	1.06268	38.3011	4.19399
ERR1135288	Pig Feces	4.93808	0.187518	0.716352	3.79853	599931	1459	2.91545	0.899228	47.9451	3.57489
ERR1135290	Pig Feces	4.2552	0.218695	0.693965	3.5214	651578	1271	2.81736	0.942764	45.1219	4.31107
ERR1135291	Pig Feces	4.87478	0.202427	0.742191	3.7966	568094	1303	2.92601	0.829323	59.693	3.21557
ERR1135308	Pig Feces	4.57497	0.20748	0.705516	4.00414	626553	1322	2.83116	0.82982	48.4661	3.74077
ERR1135309	Pig Feces	4.09862	0.213599	0.67074	4.32948	678828	1205	2.94872	0.747189	65.0033	4.14808
ERR1135310	Pig Feces	3.89539	0.20455	0.652047	4.47274	757740	1195	2.85059	0.857298	49.8377	4.19458
ERR1135311	Pig Feces	3.79888	0.161545	0.645888	4.57204	696387	1215	2.78958	0.81543	60.7845	4.40286
ERR1135315	Pig Feces	4.5683	0.204656	0.711361	4.54962	561907	1188	2.86419	0.86307	47.4802	2.93786
ERR1135318	Pig Feces	4.96118	0.227722	0.654055	4.2857	724545	1271	2.90361	0.97316	34.6152	4.42625
ERR1135327	Pig Feces	4.75147	0.207799	0.652609	4.14686	649652	1297	2.85557	1.07447	26.0951	3.96861
ERR1135334	Pig Feces	5.03127	0.193582	0.753999	3.72372	568224	1269	2.92813	0.868431	71.6707	2.86999
ERR1135337	Pig Feces	4.5316	0.192192	0.692801	3.30907	663383	1164	2.8603	0.858396	56.2559	3.10861
ERR1135340	Pig Feces	4.60157	0.17706	0.641791	3.17991	705960	1085	2.87946	0.976373	44.8247	3.59867
ERR1135345	Pig Feces	4.67153	0.172723	0.709114	3.51635	622372	1161	2.8167	0.823812	60.0903	2.77325
ERR1135353	Pig Feces	3.96869	0.145083	0.624109	3.47116	878796	1103	2.7695	0.857292	38.6663	4.96365
ERR1135364	Pig Feces	3.76549	0.122803	0.605086	2.73061	732869	1155	2.77891	0.953948	25.6731	4.68067
ERR2241627	Pig Feces	3.68545	0.151105	0.710785	2.53544	1604814	744	2.56968	0.964925	105.891	3.97018
ERR2241629	Pig Feces	4.01518	0.216824	0.698192	3.19127	1556521	795	2.57407	0.978612	101.588	4.23024
ERR2241630	Pig Feces	3.45891	0.121361	0.710747	2.16598	1792143	731	2.59748	0.893491	113.06	3.95505
ERR2241633	Pig Feces	3.87865	0.170687	0.75855	2.59582	1889386	812	2.42565	0.925484	116.383	3.60574
ERR2241636	Pig Feces	3.91857	0.199301	0.656395	2.97636	1630656	674	2.45758	0.923872	95.6396	4.55583
ERR2241638	Pig Feces	4.05517	0.123046	0.719832	2.55385	1422205	740	2.55571	0.883408	128.531	3.55264
ERR2241640	Pig Feces	3.84863	0.160546	0.75061	2.88426	2304583	746	2.4174	0.972956	102.624	3.91508
ERR2241642	Pig Feces	4.04186	0.178779	0.720162	2.41938	1691990	717	2.66066	0.9607	116.842	3.40325
ERR2241644	Pig Feces	3.84866	0.139376	0.762462	2.17577	2062729	771	2.53364	0.915899	113.051	4.00383
ERR2241646	Pig Feces	3.92861	0.151711	0.73334	2.48582	1763181	760	2.58427	0.927516	123.832	3.72763
ERR2241648	Pig Feces	4.23168	0.168332	0.741175	3.23004	1544536	740	2.45379	0.949273	128.584	3.27731
ERR2241650	Pig Feces	3.54218	0.129362	0.663752	1.95471	1642646	692	2.60728	0.800112	115.741	4.31067
ERR2241652	Pig Feces	4.05181	0.14754	0.694807	2.98774	1880806	691	2.74269	0.848944	145.527	3.49592
ERR2241654	Pig Feces	3.38894	0.142719	0.71655	2.45389	2627495	736	2.55538	0.781487	109.611	4.10135
ERR2241656	Pig Feces	3.39893	0.1613	0.718804	2.12964	2262815	780	2.70382	0.752267	118.637	4.81901
ERR2241658	Pig Feces	3.19241	0.10283	0.76742	2.10347	2868785	737	2.73167	0.713167	160.168	3.89939
ERR2241660	Pig Feces	3.1824	0.139699	0.724111	1.9945	1682163	728	2.85372	0.639656	161.599	4.11332
ERR2241663	Pig Feces	2.69266	0.1341	0.699109	1.97685	2199816	705	2.6616	0.553399	154.951	4.76641
ERR2241666	Pig Feces	5.27083	0.273082	0.707736	4.17127	1656957	769	2.92943	0.975778	100.848	5.15326
ERR2241667	Pig Feces	4.93112	0.27474	0.718078	2.84008	2020013	744	2.66233	0.923652	88.3239	4.98461
ERR2241669	Pig Feces	5.56392	0.170028	0.815181	3.90656	2117252	927	2.71971	1.08972	107.349	4.32514
ERR2241672	Pig Feces	4.40825	0.150099	0.784	2.80205	2281784	803	2.87152	0.95437	86.9684	5.10032
ERR2241673	Pig Feces	3.75205	0.081768	0.729875	1.81488	2293060	750	2.71418	0.898975	123.903	4.75704
ERR2241675	Pig Feces	5.01437	0.181294	0.766118	3.33479	648105	556	3.09817	1.34965	90.7319	3.20719
ERR2241676	Pig Feces	5.9036	0.257872	0.820341	3.77144	1289367	723	2.67132	1.07311	90.9355	3.46768
ERR2241677	Pig Feces	4.64469	0.160233	0.689725	2.88249	1700616	761	2.88181	0.875149	114.597	5.159
ERR2241680	Pig Feces	4.42156	0.159392	0.738589	1.95472	1505696	695	2.88342	0.957015	101.823	5.26247
ERR2241683	Pig Feces	4.67801	0.194739	0.735843	3.75625	2208028	777	2.75136	1.05937	106.287	4.13467
ERR2241684	Pig Feces	4.36829	0.194597	0.705393	2.89297	1952706	756	2.64558	0.903967	103.634	5.08135
ERR2241705	Pig Feces	3.38229	0.13194	0.774231	3.79979	2008453	822	2.74548	0.7028	144.36	4.90495
ERR2241707	Pig Feces	3.10578	0.074546	0.662327	2.20845	2112770	684	2.76517	0.710345	132.318	4.41865
ERR2241708	Pig Feces	3.75868	0.093211	0.722895	3.29075	2628420	765	2.62355	0.884442	104.611	4.79498
ERR2241710	Pig Feces	3.46558	0.115998	0.687481	3.95939	2155175	751	2.75292	0.792775	127.928	4.70822
ERR2241711	Pig Feces	3.45558	0.10366	0.648107	3.62634	2218755	692	2.70463	0.86244	103.148	5.03614
ERR2241712	Pig Feces	3.66876	0.10686	0.72167	3.11186	2713785	752	2.63713	0.909175	103.972	4.86325
ERR2241716	Pig Feces	4.03184	0.171934	0.668443	3.2347	1977459	702	2.62813	1.04544	94.8439	4.37941
ERR2241717	Pig Feces	4.00853	0.142041	0.670247	2.88327	2006434	716	2.67942	1.04045	100.603	4.31576
ERR2241719	Pig Feces	3.22572	0.097139	0.679665	2.73182	2161822	721	2.64865	0.674932	110.521	5.55089
ERR2241720	Pig Feces	5.00111	0.231445	0.708538	4.21833	2073868	760	2.84216	1.10594	99.6541	4.96961
ERR2241721	Pig Feces	3.28566	0.088058	0.70186	2.89832	2839012	728	2.5741	0.875807	93.8704	4.94796
ERR2241722	Pig Feces	3.31565	0.117112	0.697682	2.32659	2220058	732	2.70618	0.654955	125.034	5.17434
ERR2241723	Pig Feces	4.39489	0.199205	0.744249	3.9196	2610315	762	2.56081	1.02975	97.921	4.65114
ERR2241724	Pig Feces	3.45224	0.10458	0.725703	2.87684	2318766	781	2.73057	0.773051	117.992	4.62851
ERR2241745	Pig Feces	4.80464	0.222002	0.770737	5.97159	2387305	810	3.03964	1.09181	124.99	4.84702
ERR2241746	Pig Feces	5.23087	0.180801	0.717823	5.30525	1880486	763	3.02885	1.08242	110.121	5.07666
ERR2241751	Pig Feces	4.65809	0.212987	0.706565	5.3383	1889744	756	2.998	1.07724	129.576	4.79764
ERR2241757	Pig Feces	4.54484	0.188259	0.716409	4.87266	1845823	759	2.98773	1.0023	114.7	4.90839
ERR2241767	Pig Feces	4.315	0.146234	0.732229	5.73865	2564344	746	3.0126	1.18243	109.148	4.86104
ERR2241768	Pig Feces	4.75465	0.180805	0.727078	4.93549	2143154	784	3.00546	1.25379	111.964	5.05677
ERR2241769	Pig Feces	4.68806	0.245711	0.812068	5.76906	2207818	869	2.93975	1.05527	118.008	4.6446
ERR2245465	Pig Feces	4.87451	0.232808	0.744945	3.05162	1986554	749	2.56986	1.01685	104.861	4.01462
ERR2245466	Pig Feces	3.9752	0.136398	0.704317	2.65111	2272718	720	2.56962	0.969552	115.257	4.04175
ERR2245467	Pig Feces	3.832	0.184363	0.620983	3.62352	1640752	681	2.63756	0.992643	100.121	4.99301
ERR2245475	Pig Feces	4.59809	0.232318	0.632703	4.88166	1872376	672	2.88215	1.14078	90.3536	4.67592
ERR2245476	Pig Feces	4.50482	0.279532	0.677656	6.04268	1878072	668	2.85013	1.08029	112.411	4.03552
ERR2245477	Pig Feces	4.28831	0.235423	0.668633	3.88707	2187483	690	2.95222	1.13388	101.308	4.4423
ERR2245481	Pig Feces	5.03766	0.236422	0.688968	4.52387	2040784	709	2.76301	1.13403	114.77	4.58683
ERR2245482	Pig Feces	4.67134	0.204417	0.737489	3.29629	2482604	771	2.76073	1.07768	100.387	4.32196
ERR2245483	Pig Feces	4.86455	0.260353	0.730977	3.96195	1728369	781	2.7266	1.06015	126.262	3.66093
SRR12268554	Pig Feces	5.80696	0.219655	0.845144	2.23214	1559223	1008	2.77211	0.782366	89.2337	5.57348
SRR12268555	Pig Feces	6.84268	0.32718	0.84572	2.42199	1298941	968	3.68816	1.03243	73.8464	4.92617
SRR12268556	Pig Feces	6.1533	0.219663	0.859926	2.94991	1445363	1098	2.84169	0.788057	88.0309	5.26863
SRR12268557	Pig Feces	5.36078	0.176294	0.779388	2.45011	1659123	888	2.82821	0.874398	80.841	4.89218
SRR12268558	Pig Feces	5.49066	0.23109	0.825648	2.40781	1817425	973	2.8463	0.764908	88.9439	5.51489
SRR12268559	Pig Feces	7.33206	0.590036	0.888651	8.272	1198994	1178	3.06061	1.08708	105.096	4.69323
SRR12268560	Pig Feces	7.13254	0.490507	0.875174	10.66	1274130	1059	4.26659	1.37058	149.894	4.74953
SRR12268561	Pig Feces	6.4265	0.471898	0.851624	16.8765	1414423	973	2.91131	1.33975	173.679	4.27987
SRR12268562	Pig Feces	5.93019	0.173395	0.845961	2.7501	2076139	965	2.90561	0.929026	95.5042	4.57033
SRR12268563	Pig Feces	6.50298	0.448667	0.852552	6.24042	1175639	1011	3.01712	1.11572	107.509	5.21988
SRR12268564	Pig Feces	6.74594	0.380629	0.834923	6.21484	1635371	1011	3.02504	1.07158	107.193	5.49961
SRR17241479	Pig Feces	6.81257	0.482573	0.854843	4.11519	1036048	994	3.14619	1.24646	70.1775	4.6606
SRR17241485	Pig Feces	7.14918	0.458406	0.881855	5.84997	1117939	1286	3.05926	1.42923	105.895	4.30482
SRR17241486	Pig Feces	7.43863	0.498947	0.894233	5.77708	1327709	1278	3.14308	1.31343	106.053	4.35865
SRR17241493	Pig Feces	7.04227	0.498103	0.86985	5.64426	983672	1093	3.0573	1.31617	82.9558	4.43472
SRR17241494	Pig Feces	7.74817	0.60107	0.894584	5.50489	1114594	1261	3.15399	1.28823	101.46	4.26421
SRR17241495	Pig Feces	7.28874	0.58833	0.896338	5.14437	1117488	1343	3.05158	1.20144	88.6946	4.88936
SRR17241496	Pig Feces	8.18119	0.577893	0.904001	7.3003	1072782	1414	3.05391	1.22774	132.578	4.10847
SRR17241497	Pig Feces	7.18893	0.610534	0.899183	5.08795	1261095	1166	3.09609	1.18865	92.0694	4.73776
SRR17241498	Pig Feces	6.72617	0.449832	0.881753	5.17517	1300414	1091	3.02654	1.31944	89.5058	4.47449
SRR17241499	Pig Feces	7.50187	0.689556	0.90306	5.23313	1127434	1316	2.96484	1.02484	115.215	4.72452
SRR17241502	Pig Feces	6.9658	0.44627	0.889964	5.22326	873865	1124	3.13369	1.19756	74.454	4.41336
SRR17241504	Pig Feces	6.92257	0.475338	0.903549	5.81001	1214852	1333	3.04761	1.19798	105.641	4.61037
SRR17241507	Pig Feces	7.63165	0.519868	0.884269	4.56329	1404105	1206	3.15166	1.31446	104.208	4.30429
SRR17241509	Pig Feces	6.97227	0.387767	0.782457	4.58489	967029	828	3.05878	1.25964	89.6086	4.43572
ERR1414257	Wastewater Effluent	5.78012	0.06069	0.95424	0.667643	82385	581	3.00516	1.43271	18.1449	5.88033
ERR1414258	Wastewater Effluent	7.37148	0.087807	0.991212	0.791282	56942	552	3.11181	1.41717	21.4274	6.01571
ERR1414259	Wastewater Effluent	5.21071	0.047932	0.724695	1.20079	365099	577	3.37849	1.20708	37.4111	6.40947
ERR1414260	Wastewater Effluent	6.33275	0.054475	0.912579	1.14706	183570	514	3.3656	1.2187	34.8252	6.47558
ERR1414261	Wastewater Effluent	5.51043	0.091583	0.871212	0.762846	191080	612	3.00226	1.21992	19.6467	5.42358
ERR1414262	Wastewater Effluent	5.0042	0.031217	0.814659	0.790589	240250	593	3.07212	1.21543	19.6994	5.55453
ERR1414263	Wastewater Effluent	5.24728	0.066953	0.687917	1.10405	373395	503	3.33543	1.21882	32.8174	6.24784
ERR1414264	Wastewater Effluent	4.76776	0.055141	0.702417	1.1649	362704	497	3.35923	1.21771	34.4449	6.24394
ERR1414265	Wastewater Effluent	5.39385	0.062623	0.578398	0.959846	359291	493	3.40489	1.27577	29.8232	6.41123
ERR1661352	Wastewater Effluent	4.9545	0.056388	0.795805	9.05397	798034	946	3.88701	1.30647	61.3904	4.70803
ERR1661353	Wastewater Effluent	5.59718	0.070059	0.809989	3.85601	677994	741	4.00434	1.14404	47.0932	5.17108
ERR3569147	Wastewater Effluent	7.27525	0.375974	0.621041	3.20921	585124	716	3.76163	1.35713	86.2084	4.8264
SRR11567528	Wastewater Effluent	4.03845	0.073555	0.659437	1.33511	1631419	879	3.66412	1.36233	39.9159	6.60146
SRR12486993	Wastewater Effluent	2.05293	0.08986	0.823321	1.11388	1530144	925	3.43621	1.24532	53.725	6.64611
SRR12486996	Wastewater Effluent	4.63825	0.116831	0.847725	7.72642	984312	783	3.4892	1.10626	99.3955	2.47731
SRR12486999	Wastewater Effluent	5.29399	0.137938	0.588514	0.864505	1830498	677	3.79089	1.34862	39.6057	5.00678
SRR12487003	Wastewater Effluent	13.3661	0.130607	0.791404	6.03647	1971538	784	3.9028	1.04508	82.4219	3.22481
SRR12487006	Wastewater Effluent	7.83753	0.241737	0.523212	2.86647	2595731	716	4.18671	1.33206	50.0488	5.51139
SRR12487009	Wastewater Effluent	3.56879	0.032851	0.783561	1.14531	1826433	929	2.51994	1.09234	27.7455	6.11082
SRR12487013	Wastewater Effluent	3.4622	0.143227	0.839031	1.57495	1186910	910	3.8112	1.38123	66.0417	6.17651
SRR12487014	Wastewater Effluent	4.84459	0.079242	0.834049	1.21615	725623	835	3.15684	1.14293	71.1148	6.22414
SRR12487018	Wastewater Effluent	26.7142	0.312137	0.842887	14.3622	1770003	792	4.25469	1.11042	128.555	2.83975
SRR12487022	Wastewater Effluent	7.98389	0.181008	0.630059	2.09007	2458406	763	3.9374	1.24017	42.1671	5.10484
SRR12487026	Wastewater Effluent	6.84239	0.099948	0.787432	1.8944	1350681	1436	3.65406	1.43476	66.9728	5.90506
SRR12487029	Wastewater Effluent	3.20568	0.034793	0.663809	1.21067	2442999	883	2.94684	1.15599	32.2782	6.39911
SRR12487032	Wastewater Effluent	4.12835	0.043503	0.679912	1.10046	2183741	840	2.65744	1.05321	31.777	5.34622
SRR12487036	Wastewater Effluent	7.08557	0.106895	0.846249	1.97434	771778	1150	3.79414	0.897418	206.045	4.26324
SRR12487039	Wastewater Effluent	5.66354	0.048417	0.793376	0.882901	1445755	989	2.48501	1.06846	29.7931	5.05568
SRR12487042	Wastewater Effluent	2.51273	0.125713	0.82266	1.23133	1471583	862	3.04564	1.26548	58.9675	6.15349
SRR12487046	Wastewater Effluent	3.56548	0.15077	0.784188	0.822245	1591795	953	3.76036	1.43074	31.0923	6.7697
SRR13355620	Wastewater Effluent	3.20234	0.075341	0.848264	0.157089	829556	533	3.94331	1.34905	12.6819	6.73627
SRR13355621	Wastewater Effluent	3.53213	0.093678	0.872666	0.190308	907349	521	3.95988	1.35986	14.6594	6.74521
SRR13355622	Wastewater Effluent	3.37223	0.116773	0.868016	0.164831	941984	533	4.11003	1.36113	14.0938	6.77826
SRR13503351	Wastewater Effluent	15.2185	0.291596	0.664816	3.8825	1105951	674	4.46514	1.4369	104.012	4.39636
SRR13503352	Wastewater Effluent	13.1181	0.344686	0.739859	4.54548	1276484	777	4.45406	1.4713	129.046	4.4465
SRR13612670	Wastewater Effluent	2.68598	0.086892	0.8518	0.171474	287712	1514	2.52405	1.24664	11.8352	6.99535
SRR13612672	Wastewater Effluent	18.6666	0.239908	0.81451	5.92156	479336	1071	3.64338	1.40934	93.4682	2.26512
SRR13612674	Wastewater Effluent	5.06415	0.03629	0.678471	0.982399	688890	817	2.60348	1.20491	31.391	5.73935
SRR13612676	Wastewater Effluent	6.06313	0.061123	0.81368	1.11856	695310	891	2.34948	1.06472	26.7579	6.07434
SRR13612678	Wastewater Effluent	7.25165	0.074652	0.782448	1.32281	703260	883	3.02377	1.17228	29.667	5.61572
SRR13612680	Wastewater Effluent	5.49054	0.149728	0.746025	1.32693	601076	944	3.19444	1.25581	36.9633	5.64787
SRR14493010	Wastewater Effluent	4.11178	0.05676	0.644631	23.0431	1409438	661	4.1576	1.29834	145.953	3.63639
SRR14493015	Wastewater Effluent	5.19437	0.147314	0.736078	30.0378	1086096	747	4.15076	1.32157	186.74	2.69763
SRR14800548	Wastewater Effluent	3.98845	0.101297	0.746918	1.00192	913143	710	3.29226	1.32435	39.5273	6.12814
SRR14800551	Wastewater Effluent	1.60975	0.086225	0.850724	0.705611	608865	828	3.69306	1.27666	39.3926	6.30962
SRR14800554	Wastewater Effluent	1.50978	0.077238	0.805213	0.464983	841547	742	3.44369	1.25666	27.6036	6.65728
SRR17549183	Wastewater Effluent	1.60975	0.086225	0.848292	0.705611	608865	828	3.69165	1.27676	39.3926	6.30962
SRR17549186	Wastewater Effluent	1.50978	0.077238	0.801341	0.464983	841547	742	3.44782	1.25661	27.6036	6.65728
SRR22752010	Wastewater Effluent	7.59109	0.070819	0.593374	2.58525	1941544	818	3.98139	1.22598	90.135	5.5491
SRR22752014	Wastewater Effluent	8.01719	0.092769	0.585372	2.65029	1940276	842	3.96083	1.1796	89.935	5.6599
SRR22752015	Wastewater Effluent	7.89735	0.098876	0.612326	2.63955	2098564	864	3.95713	1.17999	90.1268	5.60444
SRR22752025	Wastewater Effluent	7.69769	0.08424	0.595083	2.63383	2107057	858	3.95584	1.17873	89.1077	5.68505
SRR22752039	Wastewater Effluent	7.36814	0.094369	0.56519	2.31389	1907376	802	4.03123	1.27667	85.8721	5.81372
SRR22752040	Wastewater Effluent	7.458	0.08014	0.592932	2.28251	2152454	847	4.00448	1.26514	85.68	5.86597
SRR22752041	Wastewater Effluent	6.93204	0.090617	0.586583	2.1919	2069128	830	3.99611	1.27165	83.6994	5.85473
SRR22752045	Wastewater Effluent	7.7409	0.090453	0.602996	2.5558	2045250	844	3.97937	1.22401	90.8059	5.64392
SRR22752046	Wastewater Effluent	7.85406	0.074802	0.604012	2.54909	1938435	826	3.96688	1.20893	87.7071	5.54115
SRR6231133	Wastewater Effluent	5.87	0.140258	0.539712	2.08556	677312	639	4.11291	1.21302	63.4413	6.1112
SRR6231146	Wastewater Effluent	5.11416	0.115965	0.572593	2.4486	603622	581	3.85504	1.25315	57.5733	5.90922
SRR6231147	Wastewater Effluent	7.81438	0.223041	0.807956	2.26861	302626	648	3.53377	1.32309	81.836	5.20238
SRR6231156	Wastewater Effluent	6.33946	0.149095	0.641724	1.37912	368884	745	4.13217	1.35517	62.2878	6.05607
SRR6231160	Wastewater Effluent	15.7503	0.411677	0.654911	5.27759	510089	678	4.31985	1.44074	174.26	3.8052
SRR6231170	Wastewater Effluent	5.14748	0.120239	0.598854	0.828094	436622	716	3.76021	1.21523	33.2737	6.16141
SRR6231172	Wastewater Effluent	4.09838	0.037694	0.490403	2.06389	1127485	619	3.57207	1.17757	46.4982	5.88011
SRR6231173	Wastewater Effluent	6.14307	0.069773	0.620936	2.53057	788262	649	3.73089	1.31273	43.7029	5.17579
SRR6231175	Wastewater Effluent	6.85889	0.092174	0.740141	2.25024	325467	636	3.53708	1.27347	87.8845	5.56105
SRR6231180	Wastewater Effluent	4.17169	0.018041	0.541494	0.591748	554299	693	3.00091	1.17364	22.9746	5.67414
SRR6231188	Wastewater Effluent	6.57278	0.088723	0.760548	2.58634	479015	726	3.68159	1.2498	79.0208	5.44388
SRR6231203	Wastewater Effluent	5.70033	0.078797	0.492299	1.41067	602809	578	3.72857	1.12354	46.363	5.56302
SRR6231204	Wastewater Effluent	6.92555	0.096904	0.808366	2.10414	283784	785	3.48539	1.25591	75.9204	5.42337
SRR6231211	Wastewater Effluent	14.5974	0.404656	0.575674	4.97428	605427	663	4.43409	1.59699	192.688	4.84502
SRR6837555	Wastewater Effluent	6.66233	0.097827	0.9102	2.1422	6490950	540	4.52227	1.33683	71.2009	5.10377
SRR6837556	Wastewater Effluent	11.7274	0.123064	0.97747	6.79707	812576	745	3.3104	1.09545	180.632	2.46672
SRR6837557	Wastewater Effluent	2.52605	0.077274	0.955369	0.863092	2620516	489	4.48265	1.39108	58.5189	6.40774
SRR6837564	Wastewater Effluent	3.53877	0.070121	0.801976	0.949825	4135690	510	4.4622	1.50827	49.4392	6.52626
SRR6837565	Wastewater Effluent	8.74929	0.072335	0.929217	4.4048	1244195	674	3.11292	1.4185	106.26	3.11006
SRR6837566	Wastewater Effluent	3.79192	0.064504	0.775981	1.18568	4534530	530	4.23092	1.4554	54.0249	6.37653
SRR6837570	Wastewater Effluent	3.39887	0.057715	0.922661	0.984859	4244992	512	4.23171	1.50253	47.1852	6.52751
SRR6837571	Wastewater Effluent	3.86522	0.092267	0.94147	1.35292	3928771	498	4.43851	1.44061	59.4802	6.03104
SRR6837572	Wastewater Effluent	6.02658	0.028346	0.918949	3.42635	3439589	629	3.72945	1.27498	98.2778	4.41341
SRR6837575	Wastewater Effluent	2.78257	0.056695	0.766586	0.831168	4144968	475	4.22563	1.4286	60.4954	6.54497
SRR6837577	Wastewater Effluent	2.90916	0.072602	0.83562	1.03218	3340096	484	4.23068	1.4109	66.7002	6.19774
SRR6837578	Wastewater Effluent	6.32943	0.047518	0.8554	1.1665	2420124	616	3.26107	1.21347	63.9979	4.91146
SRR6837583	Wastewater Effluent	2.36612	0.043934	0.929088	0.356956	4779914	513	4.13115	1.44775	29.6917	6.87092
SRR6837584	Wastewater Effluent	5.44721	0.034594	0.951292	4.56948	1878940	614	3.04624	1.21098	114.256	3.03008
SRR7877878	Wastewater Effluent	7.48558	0.021525	0.937507	1.25048	116141	7602	3.08081	1.05268	94.9353	2.41634
SRR7877879	Wastewater Effluent	4.86439	0.118502	0.709445	1.46348	527410	704	3.86277	1.4415	49.0454	5.31114
SRR7877880	Wastewater Effluent	9.16239	0	0.975794	2.40804	54878	2792	2.95781	0.716624	345.977	0.900819
SRR7877881	Wastewater Effluent	7.60539	0.070024	0.969992	2.36135	71403	6360	3.1167	0.751111	268.928	1.42783
SRR7877882	Wastewater Effluent	9.05679	0	0.938343	0.941598	100053	3537	2.97196	0.980516	72.9299	1.66331
SRR7877883	Wastewater Effluent	8.14482	0.051366	0.956067	0.676146	97339	3962	2.98184	1.12243	50.9159	2.66703
SRR7877885	Wastewater Effluent	3.07245	0.089996	0.779491	1.2836	583353	853	3.71104	1.20603	91.2773	6.12759
SRR7877886	Wastewater Effluent	8.22505	0.0585	0.950052	1.02029	85469	4295	2.91908	0.997309	78.5376	1.45867
SRR8206192	Wastewater Effluent	4.26842	0.127821	0.714239	1.85636	1603785	735	3.57403	1.28406	55.1009	5.77675
SRR8208346	Wastewater Effluent	4.81781	0.065015	0.698391	1.21284	1884177	762	3.51251	1.16645	43.9242	6.079
SRR8208349	Wastewater Effluent	5.49727	0.149752	0.719681	1.77312	1686095	709	4.03519	1.38873	62.9232	6.00934
SRR8715494	Wastewater Effluent	7.71112	0.472686	0.714881	4.45781	613478	632	4.35135	1.4524	138.393	5.06808
SRR8715496	Wastewater Effluent	14.4901	0.616872	0.635145	4.90105	737542	612	4.44805	1.51308	113.18	4.84421
SRR8870486	Wastewater Effluent	19.4689	0.350026	0.816727	6.77632	871333	1251	4.16145	1.12269	68.1499	3.997
SRR8870488	Wastewater Effluent	12.842	0.346851	0.848746	4.04014	1160402	1032	4.3837	1.25385	57.7709	3.91714
SRR8893620	Wastewater Effluent	4.125	0.090656	0.728067	0.689903	1185790	721	3.40468	1.16258	23.3751	5.62757
SRR8893621	Wastewater Effluent	4.27493	0.108985	0.71322	0.888977	1238685	705	3.55408	1.2366	31.2555	4.55522
SRR8893622	Wastewater Effluent	2.92583	0.097088	0.730619	0.508912	1081478	732	3.58919	1.32393	19.87	6.31014
SRR8893623	Wastewater Effluent	3.93185	0.099384	0.692706	0.835984	1333192	756	3.15756	1.1704	16.8656	5.095
SRR8893624	Wastewater Effluent	4.89772	0.111447	0.711323	1.39867	1458071	786	3.03588	0.994521	29.461	4.39163
SRR8893625	Wastewater Effluent	2.67263	0.051041	0.755989	0.442962	979604	735	3.12558	1.29324	20.8295	6.43118
ERR2863807	Migratory Bird Droppings	0.923248	0	0.560308	0.0602544	302918	437	2.9745	1.03841	1.90504	6.02214
ERR2863809	Migratory Bird Droppings	0.129998	0	0.636347	0.0111293	1048318	470	2.29491	0.989042	1.71398	5.74403
ERR2863810	Migratory Bird Droppings	0.826598	0	0.549497	0.13154	508594	466	2.96822	1.1353	5.23259	5.93976
ERR2863811	Migratory Bird Droppings	0.146665	0	0.789778	0.0366172	1595892	595	2.51672	0.809763	3.40806	6.53839
ERR2863815	Migratory Bird Droppings	0.359987	0.004513	0.616097	0.0982136	1107904	474	2.41294	0.872194	3.232	6.11549
ERR2863816	Migratory Bird Droppings	1.32316	0	0.624004	0.231723	775192	503	2.16648	0.745027	19.2182	6.33241
ERR2863817	Migratory Bird Droppings	0.149998	0	0.579755	0.0262971	896443	484	3.00532	1.17827	2.24968	6.27777
ERR2863818	Migratory Bird Droppings	1.11654	0.002134	0.668367	0.150149	1171731	534	2.51569	0.715434	7.39335	5.89344
ERR2863820	Migratory Bird Droppings	0.153331	0	0.580448	0.0219648	689599	468	2.62443	0.937534	1.67738	6.19382
ERR2863821	Migratory Bird Droppings	0.286658	0	0.568411	0.0337369	558803	463	2.84524	1.08706	1.82749	5.8442
ERR2863823	Migratory Bird Droppings	0.929914	0.002584	0.734779	0.196333	1935246	591	2.28002	1.16154	16.9137	6.21901
ERR2863826	Migratory Bird Droppings	0.353321	0	0.535972	0.0122502	264893	422	2.75498	1.34032	1.45613	5.87581
ERR2863828	Migratory Bird Droppings	2.01635	0	0.647821	2.75063	314256	480	2.70708	0.858197	21.6218	1.67233
ERR4083996	Migratory Bird Droppings	12.0976	0.047971	0.927367	4.52334	156343	1005	2.88509	1.04403	80.5607	1.23156
SRR10492797	Migratory Bird Droppings	12.2435	0.225446	0.972678	1.71073	144154	1468	2.86695	1.55244	56.1573	1.68588
SRR10492798	Migratory Bird Droppings	12.0225	0.124819	0.476849	3.45306	1321896	521	3.63805	1.04259	50.2925	5.07573
SRR10492799	Migratory Bird Droppings	13.5739	0.111192	0.852979	6.02793	786916	934	3.8114	1.31647	78.1244	3.6794
SRR10492800	Migratory Bird Droppings	9.84106	0.102054	0.85591	2.12921	808387	887	3.51391	1.06066	47.8721	3.9029
SRR10800386	Migratory Bird Droppings	18.0924	1.00233	0.995794	4.29643	129688	917	2.9559	1.12099	64.362	1.83434
SRR10800387	Migratory Bird Droppings	31.6983	1.29768	0.968425	24.1941	179150	1649	3.82393	1.30482	233.777	2.37966
SRR10800388	Migratory Bird Droppings	10.5028	0.24248	0.670674	2.92684	1061917	664	3.58083	1.14085	56.1078	5.17834
SRR10800397	Migratory Bird Droppings	9.85508	0.426064	0.833147	18.7628	950529	578	3.92211	1.34138	183.927	2.79957
SRR10800399	Migratory Bird Droppings	2.31621	0.090649	0.707339	1.77036	1158304	605	3.24242	1.21011	44.3056	6.01057
SRR21527943	Migratory Bird Droppings	1.12321	0	0.767889	0.744198	1021049	596	1.79759	0.992902	33.9983	4.0601
SRR21527944	Migratory Bird Droppings	6.76888	0.049685	0.694901	1.14697	1056657	707	2.05187	0.916423	83.9018	4.43636
SRR21527946	Migratory Bird Droppings	5.47708	0.016982	0.68981	1.04526	2061030	613	2.0044	1.03694	62.6553	4.66329
SRR21527947	Migratory Bird Droppings	5.71689	0.023701	0.781456	0.691969	632884	750	1.62625	0.881831	94.5281	3.72659
SRR21527956	Migratory Bird Droppings	6.62594	0.036683	0.78242	1.77267	1363016	835	3.28878	1.07327	88.1237	4.77443
SRR21527967	Migratory Bird Droppings	2.25289	0.019629	0.775925	0.860234	764175	483	3.21399	1.08348	14.0713	4.00767
SRR3327411	Migratory Bird Droppings	7.33846	0.385917	0.69247	5.01204	524700	1026	2.36967	1.29494	146.731	4.28644
SRR3327572	Migratory Bird Droppings	1.02991	0.049696	0.602268	3.65462	1157030	531	3.31212	1.15722	213.32	3.07295
SRR3327573	Migratory Bird Droppings	1.19654	0.050871	0.595275	3.76939	1032011	503	3.43866	1.16233	201.084	3.11128
SRR9850902	Migratory Bird Droppings	1.66306	0.021552	0.489788	1.04669	1043995	515	2.91213	0.835918	19.7199	5.699
SRR9850903	Migratory Bird Droppings	0.883255	0.002314	0.600916	1.14043	1080396	538	3.05325	0.875762	18.9728	5.7654
SRR9850904	Migratory Bird Droppings	0.0733329	0.004908	0.767683	0.335548	1528096	568	2.66055	1.17702	9.86978	2.65623
SRR9850905	Migratory Bird Droppings	0.846595	0.004197	0.590993	0.996922	1191235	539	3.01278	1.05112	18.9553	6.03074
SRR9850906	Migratory Bird Droppings	0.236662	0	0.774296	0.437714	1612738	568	2.18109	1.03923	25.6198	3.15202
SRR9850907	Migratory Bird Droppings	0.836597	0.014031	0.636452	1.13041	1247276	544	2.99347	0.852861	18.8559	5.64451
SRR9850908	Migratory Bird Droppings	0.889934	0.011307	0.79911	0.630658	1326641	602	2.01126	0.93477	63.9835	3.49148
SRR9850909	Migratory Bird Droppings	0.82661	0.004004	0.815917	0.542478	1248648	604	1.62166	0.760001	74.4633	3.91731
SRR9850910	Migratory Bird Droppings	1.34317	0.021099	0.821012	0.571183	1184885	603	1.68347	0.884889	74.1068	3.63638
SRR9850911	Migratory Bird Droppings	1.50644	0.011119	0.565884	0.977115	1798706	534	2.90822	1.18119	26.1856	5.83513
SRR9850912	Migratory Bird Droppings	35.2696	0.474071	0.942122	8.44342	284754	1633	3.29186	1.10569	64.6496	0.711581
SRR9850913	Migratory Bird Droppings	4.69151	0.068897	0.77217	5.95796	1632873	605	3.65378	1.21817	50.7168	3.07991
SRR9850914	Migratory Bird Droppings	0.376653	0.010088	0.695724	0.367283	1486911	547	2.82154	0.979056	8.23731	4.54772
SRR9850915	Migratory Bird Droppings	2.24958	0.019664	0.803963	4.30156	2288472	612	3.53327	1.11394	34.1851	3.19705
SRR9850916	Migratory Bird Droppings	0.189997	0	0.709294	0.296444	973508	560	2.39325	0.949753	7.97645	3.68725
SRR9850917	Migratory Bird Droppings	0.063333	0	0.814873	0.0699587	3688553	559	1.50863	1.08656	3.35295	3.32519
SRR9850918	Migratory Bird Droppings	6.61617	0.169034	0.854927	1.59596	902169	1083	2.95535	1.04068	80.3109	3.70744
SRR9850919	Migratory Bird Droppings	3.77875	0.102353	0.812767	0.952411	488499	623	2.74982	0.894991	68.2824	2.89123
SRR9850920	Migratory Bird Droppings	2.36949	0.070208	0.789648	0.75874	1353101	1558	2.86967	0.931322	66.6452	3.67824
SRR9850921	Migratory Bird Droppings	6.25638	0.210775	0.816047	1.0877	1162350	1040	2.83728	0.932315	73.3307	4.6287
SRR9850922	Migratory Bird Droppings	1.40317	0.032255	0.828645	0.907607	1240098	794	3.04529	0.945936	26.782	3.69277
SRR9850923	Migratory Bird Droppings	18.4616	0.39119	0.792049	21.0374	377042	856	3.73512	1.01573	230.283	2.75483
SRR9850924	Migratory Bird Droppings	33.1171	0.993614	0.939484	9.22145	60382	1680	3.70568	0.105223	2996.3	3.25387
SRR9850925	Migratory Bird Droppings	2.956	0	0.930791	1.02716	117275	460	1.60276	0.863167	19.8945	5.16973
SRR9850926	Migratory Bird Droppings	3.02923	0.032116	0.743798	5.05149	1634692	592	3.51659	1.17299	44.2818	3.30168
SRR9850927	Migratory Bird Droppings	30.0617	0.283122	0.869536	7.788	379687	1199	3.44159	1.12701	62.0885	1.46463
SRR9850928	Migratory Bird Droppings	5.44762	0.092456	0.679808	2.4733	811186	512	3.73201	0.733739	60.5941	4.86656
SRR9850929	Migratory Bird Droppings	2.08962	0.01935	0.793637	2.86928	2325621	619	3.55796	1.13934	27.7391	3.92539
SRR9850930	Migratory Bird Droppings	37.7882	0.576593	0.896108	11.7062	641663	1013	3.65567	1.11945	79.2116	1.70561
SRR9850931	Migratory Bird Droppings	28.547	0.417384	0.870313	8.80952	413276	1155	3.57089	1.09341	66.4044	1.67221
SRR9850932	Migratory Bird Droppings	4.02859	0.005211	0.750412	1.41684	479797	898	2.59238	1.05638	52.3083	4.22446
SRR9850933	Migratory Bird Droppings	2.05628	0.01089	0.862827	1.52148	918271	1088	2.46182	1.01071	48.6781	4.61182
SRR9850934	Migratory Bird Droppings	4.2518	0.0091	0.906391	4.49128	549472	735	2.56385	1.17354	66.8155	1.08721
SRR9850935	Migratory Bird Droppings	2.06626	0.004181	0.874286	0.441094	598006	1797	1.34037	1.02316	31.1541	5.96513
SRR9850936	Migratory Bird Droppings	7.36159	0.010567	0.904601	2.30854	709775	985	2.69736	1.12702	49.6871	2.9773
SRR9850937	Migratory Bird Droppings	4.66137	0.013334	0.901629	3.58397	562472	1110	2.52945	1.16111	60.2034	1.6684
SRR9850938	Migratory Bird Droppings	3.5355	0	0.758138	1.33738	637847	972	2.5653	1.05887	47.516	4.90845
SRR9850939	Migratory Bird Droppings	2.90262	0.186833	0.725571	7.50058	1471883	633	2.95475	1.21844	61.9082	4.8903
SRR9850940	Migratory Bird Droppings	2.7493	0.002478	0.72085	0.515943	1008863	812	2.28011	1.00064	39.7677	5.39576
SRR9850941	Migratory Bird Droppings	1.84304	0	0.736736	0.372741	660304	687	2.11058	0.920868	54.8322	5.33815
SRR9850942	Migratory Bird Droppings	8.43755	0.133271	0.853424	0.820217	318894	2253	3.13727	1.23601	52.6308	4.40907
SRR9850943	Migratory Bird Droppings	9.01927	0.025357	0.954644	4.35213	394363	1064	2.6282	1.03592	82.8603	1.85034
SRR9850944	Migratory Bird Droppings	1.43987	0.047703	0.857283	0.879627	1310192	755	3.10435	1.11412	29.5686	4.74613
SRR9850945	Migratory Bird Droppings	39.5629	0.518595	0.960179	7.59399	221743	1735	3.11635	1.01766	62.3221	0.382552
SRR9850946	Migratory Bird Droppings	31.4711	0.604921	0.933551	6.23114	165301	1070	3.12094	0.984064	56.8466	0.612957
SRR9850947	Migratory Bird Droppings	38.1962	0.734193	0.953983	7.88696	149815	1976	3.242	1.01402	67.6483	0.528843
SRR9850948	Migratory Bird Droppings	13.7755	0.189988	0.943676	2.5466	526337	854	3.08848	0.935423	36.6987	1.86161
SRR9850949	Migratory Bird Droppings	0.989919	0	0.803189	0.60447	869842	572	1.63326	0.921576	87.7218	2.59012
SRR9850960	Migratory Bird Droppings	1.89965	0.012242	0.676945	0.333767	816871	754	2.80503	1.0736	21.4441	5.79816
SRR9850963	Migratory Bird Droppings	0.0299999	0	0.766399	0.114662	1166020	922	2.45641	1.24495	9.05697	4.67883
SRR9850964	Migratory Bird Droppings	5.15108	0.070759	0.814295	0.436242	600624	1717	2.14401	1.02984	81.1222	3.98886
SRR9850965	Migratory Bird Droppings	4.58816	0.045833	0.79445	0.383339	545453	1191	2.55456	1.37572	57.4824	5.25812
SRR9850966	Migratory Bird Droppings	4.47136	0.04086	0.363477	0.572227	734209	562	3.20304	1.01885	28.1424	5.94738
SRR9850967	Migratory Bird Droppings	4.60476	0.027793	0.765602	2.52063	809544	1040	3.788	1.37232	32.1433	4.24214
SRR9850968	Migratory Bird Droppings	5.14077	0.007104	0.805941	0.527572	703848	705	1.73748	0.950838	17.5046	3.97992
SRR9850969	Migratory Bird Droppings	5.3239	0	0.831091	0.425957	1194760	821	1.72052	0.915139	15.0265	4.08487
SRR9850970	Migratory Bird Droppings	4.88446	0.021277	0.643506	1.09904	1174988	731	3.34856	1.21445	20.4444	5.33076
SRR9850971	Migratory Bird Droppings	6.34276	0.007041	0.846333	0.724644	1065220	747	2.41584	1.01113	19.36	3.9153
SRR9850972	Migratory Bird Droppings	6.66233	0.004285	0.849573	0.733895	1166816	645	1.67872	0.925862	22.7256	3.52315
SRR9850973	Migratory Bird Droppings	3.58544	0.010035	0.895092	0.402487	747370	1229	1.57954	0.913208	12.0811	3.63834
SRR9850974	Migratory Bird Droppings	5.72688	0.10166	0.818358	0.787926	934472	922	2.68371	0.932091	76.1303	3.51638
SRR9850975	Migratory Bird Droppings	4.2416	0.003087	0.868906	0.468764	809785	918	1.6781	0.965475	15.8608	3.9052
SRR9850976	Migratory Bird Droppings	6.98893	0.177012	0.858609	0.873724	889756	1333	2.76917	0.956473	73.1535	3.90568
SRR9850977	Migratory Bird Droppings	4.02517	0.105092	0.782139	0.834245	1236996	726	2.88039	0.965251	66.0795	3.46488
SRR9850978	Migratory Bird Droppings	0.57665	0.030634	0.74797	3.76509	897680	1398	3.8465	1.46411	42.2461	4.09742
SRR9850979	Migratory Bird Droppings	7.02234	0.197562	0.862336	1.85147	733931	1211	2.99121	1.07623	79.0213	3.55765
SRR9850980	Migratory Bird Droppings	6.5626	0.225402	0.89268	0.9694	288367	745	2.59292	0.859946	52.6562	3.937
SRR9850981	Migratory Bird Droppings	7.33526	0.478614	0.786516	7.17916	1018518	952	3.54739	1.45097	70.388	4.08114
SRR9850982	Migratory Bird Droppings	6.48622	0.378433	0.773126	2.72937	865373	845	3.00067	1.27768	53.1367	5.43607
SRR9850983	Migratory Bird Droppings	0.856607	0.10833	0.790152	1.66562	1338485	1009	2.8475	1.19495	21.5156	5.00875
SRR9850984	Migratory Bird Droppings	7.01232	0.388677	0.828552	3.43293	939039	1151	2.7221	1.20651	77.2873	4.43004
SRR9850985	Migratory Bird Droppings	0.713287	0.005344	0.564746	0.879464	1403321	502	3.37208	0.962285	20.5597	5.00441
SRR9850986	Migratory Bird Droppings	0.576634	0.004342	0.641743	0.459087	1151670	546	3.07399	1.0519	16.116	4.01041
SRR9850987	Migratory Bird Droppings	0.716617	0.005529	0.61603	0.527246	1808625	619	3.26275	1.06689	21.7859	4.75676
SRR9850988	Migratory Bird Droppings	7.2982	0.021522	0.834709	0.939578	464632	762	2.24749	1.09103	27.7298	3.95238
SRR9850989	Migratory Bird Droppings	4.80777	0.006884	0.81696	0.359312	1089415	824	1.77585	0.929944	12.2599	4.20858
SRR9850990	Migratory Bird Droppings	5.70016	0.003202	0.802172	0.492122	780833	717	1.53337	0.943879	15.7448	3.66086
SRR9850991	Migratory Bird Droppings	7.55112	0.025651	0.824475	0.676351	877167	658	2.06788	0.93665	20.6891	3.68959
SRR9850992	Migratory Bird Droppings	6.23977	0.028055	0.805195	0.56465	801991	721	2.85895	1.02415	13.839	3.87792
SRR9850993	Migratory Bird Droppings	5.40052	0.008556	0.813307	0.461462	876592	716	1.65963	0.908648	15.1185	3.6866
SRR9850996	Migratory Bird Droppings	7.01902	0.482962	0.744559	3.93008	569374	1157	2.62924	1.22337	71.2363	4.29075
SRR9850997	Migratory Bird Droppings	7.57509	0.569256	0.70732	8.17715	570893	720	3.55759	1.26529	62.2112	4.63993
SRR9850998	Migratory Bird Droppings	7.37509	0.474721	0.74626	6.19729	974206	852	3.30677	1.39341	89.4862	4.44549
SRR9851003	Migratory Bird Droppings	7.60125	0.110042	0.904306	0.763515	318056	1006	2.91051	0.341927	304.613	4.97286
SRR9851004	Migratory Bird Droppings	7.1762	0.111289	0.92489	0.585861	292027	4077	2.55577	0.987781	53.0447	3.78852
ERR247139	Human Gut	12.1091	0.659922	0.873045	3.70938	166676	2086	3.47577	1.0208	156.084	3.36417
ERR260171	Human Gut	8.51128	0.251129	0.886386	1.54248	248872	2622	2.80021	1.17551	206.832	3.70876
ERR260263	Human Gut	7.71515	0.179618	0.790255	2.35452	292281	1723	2.77758	1.09786	181.646	4.2055
ERR260267	Human Gut	8.98966	0.338923	0.806771	1.7838	243411	1395	3.07525	1.10432	207.215	3.62124
ERR2619708	Human Gut	10.1747	0.344367	0.896902	2.82032	196006	2127	2.7181	0.94864	100.944	2.46191
ERR2619712	Human Gut	7.79834	0.228266	0.868637	2.34113	186181	1829	2.88915	0.83425	109.169	2.54585
ERR2619719	Human Gut	2.0731	0.125661	0.55347	11.455	517261	455	4.29785	1.56798	178.138	4.40252
ERR2619728	Human Gut	11.9287	0.625377	0.900558	3.31021	187878	2217	2.71752	0.982627	120.332	1.94934
ERR2619732	Human Gut	5.42758	0.211289	0.834039	2.36718	260301	1556	2.59114	1.0213	98.9203	3.07433
ERR2619737	Human Gut	7.65486	0.233953	0.811462	2.70879	320568	1552	3.15642	1.03872	121.586	3.83788
ERR2619741	Human Gut	7.8418	0.341317	0.789816	3.28901	395517	1227	3.38888	0.813335	113.067	4.02428
ERR2619742	Human Gut	10.5612	0.500794	0.927551	5.83153	144764	2424	2.29655	0.916621	151.776	2.13138
ERR2619743	Human Gut	6.10016	0.23823	0.80665	2.41479	283333	1349	2.70936	0.867444	101.08	4.1103
ERR2619747	Human Gut	7.02294	0.267417	0.793628	3.32905	289803	1388	3.76111	0.987918	111.184	3.75926
ERR2619753	Human Gut	8.87994	0.385598	0.873045	2.65583	207463	1454	3.11133	0.775053	147.614	3.62414
ERR2619755	Human Gut	10.0619	0.623292	0.862234	3.12047	204549	1665	3.33619	0.785658	125.236	3.18959
ERR2619760	Human Gut	6.86688	0.286872	0.835155	2.98885	252722	1691	3.81448	1.1672	109.491	2.99237
ERR2619762	Human Gut	13.1335	0.763409	0.949171	6.21674	108063	4346	2.98195	1.1799	172.904	2.11123
ERR2619763	Human Gut	19.0054	1.93242	0.960105	8.17411	77614	3182	3.77501	0.957213	190.759	2.28452
ERR414265	Human Gut	9.92744	0.454009	0.886405	2.41412	148670	5544	3.83348	1.44389	19.4776	3.68236
ERR414285	Human Gut	10.5586	0.492535	0.898629	3.68948	111663	4330	2.49619	1.55034	21.5851	3.34185
ERR414291	Human Gut	13.0843	0.509875	0.930395	1.66301	112768	5962	2.95445	1.31998	10.7645	2.60568
ERR414302	Human Gut	7.16934	0.2884	0.85412	1.31894	251380	2530	2.65099	1.13867	11.4989	4.28265
ERR414305	Human Gut	10.8056	0.80159	0.907406	5.60978	106032	6180	2.61208	1.36296	6.51237	2.80809
ERR414308	Human Gut	9.10762	0.251465	0.936339	2.17888	109356	6795	2.15928	1.37299	11.7945	3.02072
ERR414318	Human Gut	8.99098	0.372417	0.869406	3.40179	174529	3823	2.71039	1.27392	10.1721	3.73543
ERR414319	Human Gut	13.5347	0.751755	0.903355	4.02588	123038	5082	3.91675	1.34774	16.7431	3.66771
ERR414421	Human Gut	10.3395	0.508389	0.911491	3.76974	93429	4310	2.8573	1.05923	13.1544	3.30102
ERR414453	Human Gut	12.6191	0.549365	0.936688	3.53513	150166	8070	2.80858	1.41862	26.6337	3.25679
ERR414475	Human Gut	18.1115	0.698593	0.941699	5.72108	139559	6137	3.22103	1.46471	14.5925	2.37284
ERR414493	Human Gut	14.177	0.792131	0.87622	4.19803	116764	5790	3.32809	1.39278	11.4861	3.32787
ERR414496	Human Gut	9.23086	0.321542	0.885231	2.3612	171047	3572	2.75214	1.29525	14.6964	3.32972
ERR414497	Human Gut	13.4112	0.809595	0.942058	3.20656	98807	5424	2.62697	1.31618	14.9233	2.65704
ERR479161	Human Gut	9.15137	0.473481	0.877183	5.27806	126716	4404	3.02897	1.08256	102.477	3.68271
ERR479327	Human Gut	11.1662	0.653214	0.881439	7.18136	133947	4592	4.07114	1.54357	143.07	3.40881
ERR505083	Human Gut	8.5346	0.543695	0.883612	2.59296	188514	3661	2.81759	1.25487	183.982	3.39467
ERR505084	Human Gut	8.34484	0.39347	0.911353	2.40836	209664	3768	2.77197	1.2952	179.826	3.40077
ERR505085	Human Gut	7.88558	0.326423	0.911095	2.8385	245073	2920	2.73759	1.20442	142.361	3.61483
ERR505086	Human Gut	6.94311	0.243372	0.864421	2.43555	225985	2724	2.84494	1.24284	138.032	3.90216
ERR505087	Human Gut	9.46697	0.410527	0.914986	4.78647	140058	4902	2.34156	1.32764	199.218	2.60275
ERR505093	Human Gut	11.2118	0.328075	0.930404	3.35999	152399	5330	2.68086	1.32775	294.792	2.9565
ERR505097	Human Gut	8.46149	0.442188	0.887856	4.78843	158295	2336	2.76008	1.07611	161.687	3.04606
ERR505099	Human Gut	9.81288	0.704306	0.895332	9.07358	124227	2631	2.43502	1.29924	283.228	2.62986
ERR505103	Human Gut	12.4207	0.687624	0.954681	2.9399	98158	4962	2.36338	1.31473	284.895	2.20677
ERR505104	Human Gut	10.4663	0.71677	0.944953	4.17878	87190	4145	2.14761	1.25466	337.34	2.06222
ERR505105	Human Gut	7.67551	0.314421	0.89945	3.32984	198774	2807	2.36525	1.16395	208.013	3.2528
ERR505106	Human Gut	10.9477	0.549639	0.87498	3.19416	172830	2877	3.54196	1.13587	226.399	3.17455
ERR748156	Human Gut	6.5164	0.182205	0.90413	1.08776	178367	1573	2.45352	1.22394	133.627	3.22252
SRR061169	Human Gut	8.7683	0.378798	0.894214	2.60202	125392	4656	2.60904	1.35526	153.712	2.94344
SRR061494	Human Gut	11.4136	0.436335	0.957113	3.0383	63023	4208	1.57339	1.53042	217.922	1.08256
SRR1761679	Human Gut	8.29482	0.353897	0.863495	3.27117	226047	2232	2.51354	1.01672	175.928	3.54517
SRR1761680	Human Gut	10.9936	0.50354	0.872314	4.49713	203552	2075	3.31721	1.38403	227.136	3.46803
SRR1761682	Human Gut	9.32679	0.477747	0.896616	1.79753	136049	2373	2.60373	0.981482	231.712	3.06844
SRR1761685	Human Gut	9.89252	0.500851	0.895147	3.44197	174695	2743	2.50954	1.11789	204.927	3.58388
SRR1761688	Human Gut	8.30873	0.279427	0.904915	1.67996	143147	3212	2.65891	1.14171	234.519	3.03712
SRR1761692	Human Gut	9.06072	0.190656	0.918331	1.71951	118011	3218	2.6163	1.096	232.187	3.33594
SRR1761695	Human Gut	10.9209	0.619974	0.859991	3.9692	197576	2116	3.55157	1.21503	201.658	3.50973
SRR1761699	Human Gut	5.79065	0.180399	0.817324	1.63062	360307	1343	3.06764	0.727825	84.9502	4.42624
SRR1761704	Human Gut	6.25023	0.168313	0.825406	1.69376	222797	989	2.72403	0.873052	63.3327	3.62665
SRR1761705	Human Gut	5.16123	0.161936	0.845627	1.20549	185255	1417	2.64137	0.897913	67.979	3.44593
SRR1761708	Human Gut	5.49093	0.252874	0.8335	2.19598	207608	1054	2.32328	0.933935	71.3972	2.86915
SRR1761711	Human Gut	5.68058	0.136121	0.763784	1.81408	293854	907	2.80285	0.767584	89.9162	3.62538
SRR1761712	Human Gut	9.13304	0.313821	0.814696	1.43037	246947	1322	3.27027	0.728459	57.5615	3.92982
SRR1761715	Human Gut	6.92567	0.205251	0.753802	1.83105	267958	1153	3.22747	0.842962	87.7607	3.85405
SRR1761717	Human Gut	7.1057	0.245308	0.77233	1.37633	275159	1224	3.23899	0.819698	57.8347	4.42815
SRR1929408	Human Gut	7.85846	0.315793	0.806482	4.46707	443317	1294	3.84349	1.10091	86.4195	3.79538
SRR1930121	Human Gut	7.30871	0.33927	0.84141	2.78045	405268	1544	2.24798	0.967683	91.5478	3.45301
SRR1930141	Human Gut	7.03883	0.237827	0.846685	2.71659	399439	1522	2.49834	1.03133	92.2381	3.06164
SRR1931173	Human Gut	9.09726	0.586007	0.862976	2.49394	170636	3365	3.04939	1.36115	190.854	3.52793
SRR341632	Human Gut	15.5478	0.975945	0.956609	2.88021	61474	5822	2.7105	1.28616	0.637893	1.73024
SRR341633	Human Gut	19.2447	1.22416	0.917281	4.53571	83720	4879	3.46634	1.28054	0.641614	2.23568
SRR3992955	Human Gut	9.68452	0.40945	0.94544	6.66025	293065	1660	4.17645	1.45717	186.418	2.66246
SRR3992956	Human Gut	8.21079	0.396502	0.962216	1.75891	233279	1434	2.67101	0.93949	141.878	3.19261
SRR3992974	Human Gut	7.25548	0.17692	0.974685	1.0518	127174	1789	2.29237	0.936593	114.329	3.45115
SRR3992976	Human Gut	6.74924	0.208268	0.914064	1.22845	264077	1484	2.47865	0.991383	116.046	2.95132
SRR3992979	Human Gut	8.18093	0.39811	0.917741	1.67393	326532	1538	3.09452	1.06162	117.527	3.78021
SRR3992981	Human Gut	8.03154	0.386014	0.940017	1.39594	284954	2191	2.55145	1.14184	134.147	3.70279
SRR3992983	Human Gut	7.05215	0.301146	0.945891	1.28176	232438	1501	2.07924	0.94174	118.152	3.95796
SRR3992984	Human Gut	8.46424	0.338692	0.91998	1.2443	243577	2312	2.54697	1.07404	141.249	3.32048
SRR3992992	Human Gut	8.69354	0.391891	0.883733	2.09182	306194	1439	2.85569	0.992441	147.559	2.94505
SRR3992994	Human Gut	9.54609	0.296354	0.920653	1.66808	194019	2218	3.44341	1.18331	176.026	2.93231
SRR3992995	Human Gut	6.93581	0.230917	0.94169	1.05623	476347	1793	2.41328	0.920449	108.423	3.92685
SRR3993011	Human Gut	6.5498	0.239695	0.939668	0.926083	187735	1797	2.01177	0.866538	95.6383	2.73121
SRR3993029	Human Gut	8.66671	0.31954	0.883511	1.51542	258176	1332	2.74145	1.10246	142.551	2.94577
SRR3993036	Human Gut	8.85011	0.313196	0.910569	1.06842	263407	1662	2.37759	1.01899	105.464	3.5989
SRR3993038	Human Gut	8.4138	0.266044	0.900641	1.34904	319487	1384	2.72695	1.01141	128.37	3.3468
SRR3993039	Human Gut	7.42484	0.215784	0.831556	1.08802	382317	985	2.60928	0.981758	117.731	3.52102
SRR3993041	Human Gut	9.51271	0.469185	0.942159	1.81642	319690	2747	2.69824	1.05089	163.87	3.24913
SRR3993044	Human Gut	7.65885	0.328866	0.94363	1.48686	410488	2456	2.77156	1.02941	141.188	3.36929
SRR4305530	Human Gut	8.49447	0.51105	0.907747	2.21143	92942	1114	2.67669	1.46201	129.492	2.15473
SRR4408001	Human Gut	9.07466	0.20453	0.929475	5.31743	85561	2616	2.28755	1.21432	226.809	2.46331
SRR7658581	Human Gut	6.10013	0.075986	0.835787	1.70074	427707	1291	2.77591	0.716462	119.862	4.05253
SRR7658622	Human Gut	10.1167	0.36151	0.912026	6.56985	117560	1173	4.21635	0.337917	705.739	3.10746
SRR7658627	Human Gut	21.1444	1.34683	0.938233	18.4685	135489	1413	4.27263	1.32511	258.46	2.70758
SRR7658639	Human Gut	9.17202	0.387063	0.963234	20.0743	206681	1968	4.13525	0.840222	262.387	2.3527
SRR7658652	Human Gut	27.049	1.24725	0.952523	8.02081	120256	1996	4.27382	0.428465	480.222	3.40941
SRR7658659	Human Gut	8.71343	0.205444	0.903761	2.02335	352886	1920	2.75429	0.885076	89.4555	3.43561
SRR7658661	Human Gut	24.3809	0.895967	0.907203	11.218	351545	1585	4.38431	1.37706	152.117	3.54026
SRR7658664	Human Gut	15.5882	0.614799	0.942095	29.6384	203312	1394	4.18352	1.47203	293.758	2.006
SRR8180447	Human Gut	6.62666	0.134683	0.916147	1.64317	185618	3278	2.6485	0.929039	99.0571	2.44198
SRR8784356	Human Gut	9.42585	0.440601	0.947921	2.25679	107802	1638	3.06287	0.996187	140.697	1.75192
SRR8784358	Human Gut	6.86268	0.225303	0.870934	1.8259	233014	1036	2.83105	0.807812	107.135	3.05841
SRR8784364	Human Gut	7.42839	0.131663	0.898989	2.47916	170889	1600	2.38163	0.809053	128.553	2.24055
SRR8784370	Human Gut	5.83681	0.051443	0.766174	1.08843	437372	1084	2.40221	0.630758	82.8083	4.15229
ERR4191852	Chicken Feces	9.36565	0.362781	0.86621	5.32666	1095654	1259	2.81061	1.15886	176.623	4.11576
ERR4191853	Chicken Feces	9.42183	0.346706	0.950558	4.22058	1088774	1112	2.65432	1.11079	167.693	4.39681
ERR4191854	Chicken Feces	8.55689	0.290938	0.936476	4.39328	1151416	1087	2.86255	1.19675	179.086	3.94799
ERR4191855	Chicken Feces	9.28923	0.359005	0.863967	4.87729	1176822	1157	2.87388	1.18092	184.069	4.16395
ERR4191856	Chicken Feces	8.81323	0.404814	0.868035	4.08097	1278308	1151	2.78381	1.17249	163.176	3.86618
ERR4191857	Chicken Feces	8.80324	0.355992	0.875174	5.10227	1228913	1089	2.81231	1.25583	198.722	3.54576
ERR4191859	Chicken Feces	5.97027	0.283299	0.82252	6.04267	1870759	832	2.98231	1.25844	188.007	4.37096
ERR4191860	Chicken Feces	9.63556	0.452299	0.89111	8.16275	934075	1100	3.1375	1.43955	240.553	3.32127
ERR4191861	Chicken Feces	8.4837	0.396775	0.84311	6.26878	1291605	1036	2.84986	1.16746	178.981	4.65758
ERR4191863	Chicken Feces	9.13268	0.381054	0.866831	7.0616	1187445	1185	2.62802	1.16909	195.136	4.64247
ERR4191864	Chicken Feces	8.74993	0.329074	0.840444	3.79201	1207893	925	2.90934	1.15332	172.85	3.37134
ERR4191865	Chicken Feces	6.8727	0.314604	0.823098	4.61023	1096581	891	2.92927	1.28584	169.171	3.81033
ERR4191866	Chicken Feces	8.59368	0.336386	0.849461	4.2332	1203931	1133	2.741	1.17881	172.838	4.19969
ERR4191868	Chicken Feces	9.70185	0.441424	0.953496	5.34555	843818	1152	3.00893	1.32708	197.569	3.22701
ERR4191870	Chicken Feces	8.89986	0.356938	0.840304	5.94999	1078580	1153	3.16137	1.33255	190.343	4.05396
ERR4191873	Chicken Feces	8.86665	0.390105	0.850297	4.95237	942014	1196	2.93934	1.25334	189.028	3.97257
ERR4191875	Chicken Feces	5.12768	0.21695	0.789059	5.19027	1958929	793	2.8476	1.17479	173.931	4.61809
ERR4191876	Chicken Feces	7.34538	0.274881	0.801948	4.20706	1273245	953	2.99362	1.15051	211.611	4.30949
ERR4191877	Chicken Feces	6.5596	0.254272	0.802246	3.69051	1327283	830	2.84771	1.19101	192.135	4.15761
ERR4191878	Chicken Feces	7.61495	0.359776	0.829528	4.21463	1271574	896	2.85349	1.16328	154.595	3.62436
ERR4191880	Chicken Feces	6.89939	0.351693	0.939585	7.36805	1194186	790	3.18373	1.33982	212.792	3.76384
ERR4191881	Chicken Feces	8.67688	0.349568	0.844485	4.87277	893927	1013	2.97855	1.24915	192.43	3.63245
SRR10897114	Chicken Feces	24.3832	2.48701	0.990708	4.93661	50251	16981	2.55134	1.50771	140.763	2.25523
SRR10897115	Chicken Feces	14.3013	1.03368	0.977754	4.30793	157195	4336	2.72583	1.50239	175.129	2.34403
SRR10897116	Chicken Feces	6.32507	0.482685	0.963693	19.5029	212348	838	3.33822	1.49844	178.675	1.866
SRR10897117	Chicken Feces	25.0311	2.2947	0.991514	20.4566	64269	22704	3.43155	1.57999	431.951	2.94276
SRR12730714	Chicken Feces	0.196663	0.018427	0.972559	0.295989	271344	31623	2.82836	1.21131	17.2607	2.9607
SRR12730716	Chicken Feces	3.71889	0.199712	0.869045	5.9748	1677375	943	2.50905	1.22664	209.915	4.73149
SRR12730717	Chicken Feces	4.44175	0.198612	0.88352	5.51431	1585976	880	2.44884	1.14856	188.076	4.93684
SRR12730718	Chicken Feces	4.09196	0.185279	0.863207	5.58629	1592164	1224	2.58394	1.31267	191.421	4.31158
SRR12730723	Chicken Feces	5.87062	0.276678	0.905893	5.72145	1147504	1007	2.52526	1.34473	195.866	4.23046
SRR12730725	Chicken Feces	9.27023	0.579811	0.937387	5.4461	646721	2499	2.55554	1.34967	179.247	4.08962
SRR12730726	Chicken Feces	4.10862	0.219406	0.860677	6.06591	1333117	1551	2.61348	1.37185	178.959	4.19741
SRR12730727	Chicken Feces	3.76223	0.210207	0.882299	5.92283	1629314	923	2.46638	1.33378	196.336	4.28414
SRR12730730	Chicken Feces	5.86385	0.287164	0.867998	5.37988	1218776	2827	2.76345	1.28022	175.751	4.76853
SRR12730731	Chicken Feces	5.27425	0.233279	0.882919	4.97597	1103800	2989	2.47966	1.24775	178.551	4.74139
SRR12730732	Chicken Feces	6.21359	0.288269	0.901666	6.07537	1031989	1030	2.55468	1.35824	196.441	4.22016
SRR12730735	Chicken Feces	8.42159	0.539674	0.928867	5.91605	750409	1621	2.62571	1.33712	196.191	4.58907
SRR12730736	Chicken Feces	4.36185	0.228768	0.896551	5.6646	1737521	885	2.55807	1.29384	174.777	4.31586
SRR12730737	Chicken Feces	4.44521	0.223151	0.895637	6.07795	1120293	2313	2.58261	1.23887	208.859	4.61073
SRR12730738	Chicken Feces	6.78618	0.37194	0.92174	6.10298	746060	11334	2.55701	1.17289	215.666	4.65083
SRR13089990	Chicken Feces	25.9025	3.67131	0.993572	57.4259	73528	969	3.48224	1.44637	526.591	0.880613
SRR13089992	Chicken Feces	6.05453	1.21097	0.982801	17.3733	222945	430	2.88246	1.14589	174.222	1.09258
SRR13089993	Chicken Feces	7.85538	0.666723	0.939235	14.919	693647	1225	3.17726	1.47448	217.454	3.31418
SRR13089994	Chicken Feces	12.2913	1.01793	0.951485	33.4036	449401	1453	3.48931	1.66842	358.815	2.51488
SRR13089995	Chicken Feces	12.7043	1.43754	0.972174	6.53545	384286	2215	3.03709	1.35414	178.202	2.96014
SRR13089997	Chicken Feces	12.2522	1.22128	0.975015	37.9923	343867	1701	3.49163	1.62354	428.662	2.35877
SRR13089998	Chicken Feces	12.2358	1.4582	0.9754	10.7592	378840	2478	3.27657	1.47821	207.289	3.76547
SRR13089999	Chicken Feces	7.39554	0.730355	0.917437	18.8142	941253	768	3.33215	1.64532	218.831	3.10832
SRR13090000	Chicken Feces	4.21188	0.365726	0.896597	12.0584	1305579	806	3.04663	1.59818	162.257	3.62806
SRR13090001	Chicken Feces	9.09703	0.911914	0.949382	54.7415	463277	915	3.44137	1.56961	487.398	1.80217
SRR13090003	Chicken Feces	9.66935	0.946543	0.929014	19.6935	697210	1349	3.34395	1.42575	324.33	3.80936
SRR13090004	Chicken Feces	9.53965	0.771058	0.935741	15.002	570611	1443	3.11408	1.58716	206.479	3.35328
SRR13783083	Chicken Feces	7.65151	0.362323	0.875063	7.42033	1062544	1210	2.28714	1.40121	156.209	4.01391
SRR13783084	Chicken Feces	7.92771	0.41003	0.864764	6.41969	908430	1159	2.29271	1.40787	157.734	3.96785
SRR13783085	Chicken Feces	7.9082	0.540497	0.896505	6.14295	615141	1467	2.111	1.377	186.17	3.22438
SRR13783087	Chicken Feces	7.91458	0.429324	0.868915	6.70448	879251	1167	2.30565	1.37496	155.982	4.32903
SRR13783088	Chicken Feces	7.9478	0.431953	0.874323	4.96922	781304	1198	2.32866	1.35343	144.468	4.40703
SRR13783090	Chicken Feces	7.20218	0.422341	0.858572	5.8989	816837	1253	2.28811	1.35526	144.742	4.12207
SRR9113691	Chicken Feces	14.1019	0.54252	0.982279	2.86577	142843	1149	2.72773	0.955027	56.4524	2.89179
SRR9113696	Chicken Feces	10.1619	0.408853	0.916506	2.64299	262921	1524	2.44023	1.27705	102.867	3.69426
SRR9113698	Chicken Feces	12.1422	0.776274	0.990553	3.70181	122371	1352	2.75805	1.11694	124.501	1.33092
SRR9113699	Chicken Feces	15.1222	0.49157	0.946166	38.279	264452	866	3.35466	1.33796	374.387	1.15461
SRR9113702	Chicken Feces	9.97926	0.438093	0.961876	1.67805	182602	1444	1.59196	1.25486	74.6467	1.36209
SRR9113704	Chicken Feces	6.7931	0.222951	0.887348	4.08122	571862	1246	2.74624	1.575	147.062	3.2746
SRR9113705	Chicken Feces	7.20531	0.164255	0.851485	1.56149	745777	991	2.30863	1.4314	116.356	3.64934
SRR9113706	Chicken Feces	6.69284	0.211516	0.86165	3.22383	472767	1186	2.01605	1.36686	146.258	3.30826
SRR9113707	Chicken Feces	7.87852	0.333396	0.907895	3.48359	292435	855	2.64479	1.21383	80.202	3.46859
SRR9113708	Chicken Feces	12.5873	0.662001	0.967774	4.05509	181259	2088	3.18331	1.15845	119.099	2.83839
SRR9113710	Chicken Feces	6.35652	0.158866	0.912312	2.37381	692395	1408	2.0454	1.32415	122.989	3.47729
SRR9113711	Chicken Feces	1.54652	0.104488	0.894482	2.599	406739	556	2.23317	1.15383	79.8371	2.78626
SRR9113712	Chicken Feces	6.47954	0.126776	0.908725	2.78268	788786	1004	2.16116	1.32216	140.989	3.37172
SRR9113713	Chicken Feces	19.136	1.12441	0.951338	28.7301	182299	935	3.38972	1.30802	376.145	1.37144
SRR9113714	Chicken Feces	11.4198	0.491009	0.931628	3.20042	290206	1444	2.95661	1.28558	115.271	3.89224
SRR9113716	Chicken Feces	5.74049	0.17492	0.897825	2.55361	628846	1297	2.04396	1.33012	141.358	3.13296
SRR9113722	Chicken Feces	7.96482	0.227577	0.910735	3.29702	670090	1125	2.75693	1.37351	120.217	3.62209
SRR9113723	Chicken Feces	6.49294	0.152352	0.859128	2.35131	722000	1053	2.15496	1.33384	122.695	3.6971
SRR9113724	Chicken Feces	6.33644	0.120608	0.907904	2.91238	621842	1199	2.00624	1.3447	158.647	3.04199
SRR9113725	Chicken Feces	8.49188	0.405348	0.958178	6.10038	222025	702	3.28121	1.24705	122.203	2.78602
SRR9113726	Chicken Feces	6.07021	0.132167	0.894796	2.22173	529626	1620	2.03343	1.29648	114.83	3.45143
SRR9113728	Chicken Feces	6.88278	0.165804	0.941442	2.74659	437253	1549	1.98667	1.37827	147.912	3.45065
SRR9113729	Chicken Feces	6.21331	0.16335	0.886331	2.67795	566260	1136	2.23886	1.30496	143.246	3.68909
SRR9113731	Chicken Feces	9.24415	0.686871	0.967123	11.5031	327551	788	3.41793	1.35479	152.318	2.28197
SRR9113735	Chicken Feces	7.08562	0.180998	0.92524	2.74168	635354	1420	2.04537	1.35873	131.784	3.21707
SRR9113736	Chicken Feces	7.95507	0.556355	0.973879	5.41496	134799	679	2.23671	1.2001	111.248	1.68266
SRR9113737	Chicken Feces	9.18649	0.44964	0.911648	3.93648	250188	648	3.08266	1.30324	96.4601	3.6155
ERR11269298	Hospital Sewage	18.922	0.660821	0.888346	15.054	1252165	815	4.68356	1.52079	275.715	4.53652
ERR11269302	Hospital Sewage	15.5405	0.465492	0.84878	8.95362	1901128	822	4.89609	1.55893	203.164	4.34247
ERR11269309	Hospital Sewage	25.2493	0.678151	0.938825	14.9825	807299	1101	4.48422	1.31175	255.813	2.33552
ERR3519521	Hospital Sewage	10.1516	0.28882	0.722286	6.71238	1713828	693	4.88175	1.5618	200.771	4.51822
ERR3519522	Hospital Sewage	11.9199	0.291902	0.760795	12.6709	1430235	680	4.06965	1.56094	197.995	3.49318
ERR3519523	Hospital Sewage	13.0564	0.303354	0.864562	7.03523	964191	829	3.78514	1.44555	118.882	2.59469
ERR3519524	Hospital Sewage	15.3287	0.413501	0.826244	10.5648	1172870	790	4.39305	1.3547	172.304	3.46922
ERR3519526	Hospital Sewage	12.7113	0.366201	0.784921	7.89633	1433594	778	4.37412	1.5575	234.769	3.79917
ERR3519527	Hospital Sewage	14.3526	0.357883	0.782676	12.1759	1278307	683	4.44895	1.55151	182.025	3.54703
ERR7015328	Hospital Sewage	8.83613	0.50242	0.815128	7.25341	970251	823	4.34104	1.45743	85.5431	4.91774
ERR7015329	Hospital Sewage	8.59439	0.576813	0.83968	6.06969	806110	1003	4.31539	1.50763	73.9096	5.02124
ERR7015330	Hospital Sewage	7.01704	0.421724	0.753161	4.72899	1108488	759	3.97193	1.59626	49.8892	5.47665
ERR7015343	Hospital Sewage	5.92947	0.383912	0.81192	6.73432	1093959	781	3.98493	1.56712	78.9963	5.3106
ERR7015344	Hospital Sewage	6.84879	0.383093	0.676558	8.40605	1664027	664	4.60044	1.64788	115.58	5.13087
ERR7015345	Hospital Sewage	7.34372	0.519332	0.770298	7.79008	1227482	711	4.53766	1.49731	86.475	4.74815
ERR7015346	Hospital Sewage	6.78147	0.346652	0.717326	4.43775	1377416	771	4.4726	1.56973	61.2823	4.94681
ERR7015347	Hospital Sewage	7.09681	0.512836	0.945067	2.00227	316850	1026	3.83091	1.30733	32.9334	5.4485
ERR7015348	Hospital Sewage	9.57673	0.721272	0.916569	9.68373	398574	1168	3.65566	1.30368	89.008	4.52126
ERR7015350	Hospital Sewage	10.2248	0.77082	0.898701	11.141	369709	1167	3.7354	1.36792	106.373	4.62421
ERR7015351	Hospital Sewage	6.59579	0.30935	0.834994	3.45772	945501	992	4.26446	1.49615	61.2031	5.15964
ERR7015362	Hospital Sewage	4.49242	0.236803	0.886259	1.82275	633422	980	3.59972	1.29213	44.5798	5.37888
ERR7015367	Hospital Sewage	19.9033	0.956902	0.89594	24.0833	632198	965	4.78457	1.31078	255.465	2.86954
ERR7015368	Hospital Sewage	7.75849	0.353499	0.791226	5.31758	1004208	843	4.25717	1.42839	71.4157	5.23435
ERR7015369	Hospital Sewage	6.5655	0.280487	0.864142	1.42551	677376	1007	3.84301	1.17848	43.9027	5.30717
ERR7015373	Hospital Sewage	10.5536	0.484449	0.857151	8.60195	686319	871	4.14036	1.3597	124.381	4.52315
ERR7015374	Hospital Sewage	2.05506	0.052794	0.669814	0.512964	1420598	555	3.03834	1.09217	12.7008	5.16424
ERR7015375	Hospital Sewage	10.0255	0.444722	0.78812	7.33785	1000583	736	4.69311	1.2952	92.6033	4.33526
ERR7015376	Hospital Sewage	13.8525	0.801903	0.807473	11.5479	900914	771	4.83349	1.42676	113.262	3.33703
ERR7015379	Hospital Sewage	8.99513	0.405479	0.722253	4.16126	1165242	750	4.50813	1.57353	90.5311	5.11775
ERR7015380	Hospital Sewage	13.8844	0.623402	0.794168	10.0381	878201	768	4.87039	1.46804	128.082	3.68003
ERR7015385	Hospital Sewage	13.8066	0.617674	0.837055	7.87239	951098	859	4.70798	1.59539	134.653	3.77583
ERR7015387	Hospital Sewage	11.4722	0.582306	0.766635	10.5359	1279338	725	4.9536	1.64031	155.877	4.1281
ERR7015389	Hospital Sewage	9.42449	0.422286	0.668546	4.91175	1379347	640	4.76422	1.56868	98.7466	4.48331
ERR7015390	Hospital Sewage	10.6287	0.398683	0.691499	6.46003	1492367	658	4.89439	1.62119	135.583	4.36183
ERR7015391	Hospital Sewage	5.15472	0.23531	0.817452	1.57672	924287	686	4.03894	1.4922	49.1583	5.42117
ERR7015393	Hospital Sewage	5.34158	0.302591	0.83253	3.36733	941837	742	4.27844	1.41377	58.7092	5.15797
ERR7015394	Hospital Sewage	6.71703	0.263499	0.83909	3.11788	806435	924	3.86679	1.48235	59.7582	5.04426
ERR7015395	Hospital Sewage	15.2144	0.660845	0.7177	12.9446	820878	784	4.87431	1.60368	243.053	4.2593
ERR7015397	Hospital Sewage	10.4757	0.26287	0.757621	3.14277	1245827	809	4.40415	1.51362	173.33	4.38156
ERR7015398	Hospital Sewage	21.3822	0.835351	0.85991	7.86391	547637	933	4.74445	1.53551	176.158	3.19959
ERR7015399	Hospital Sewage	27.9213	0.739505	0.928623	10.3145	341427	881	4.47915	1.56205	147.954	1.79767
ERR7015400	Hospital Sewage	15.3063	0.414029	0.874343	8.11407	531342	1113	3.78095	1.59337	170.281	3.32276
ERR7015401	Hospital Sewage	13.4251	0.395748	0.792549	7.95322	833835	824	4.76154	1.62531	199.751	3.77392
ERR7015402	Hospital Sewage	12.0961	0.457244	0.814366	6.45935	934913	858	4.6743	1.54446	226.794	3.82444
ERR7015403	Hospital Sewage	16.8405	0.432479	0.856013	4.91447	589600	1106	4.45031	1.58685	124.75	3.33527
SRR11088386	Hospital Sewage	12.3088	0.390056	0.806772	10.6786	2134222	566	4.64347	1.57421	273.988	3.5675
SRR11088387	Hospital Sewage	12.7697	0.395782	0.798361	8.68481	2040173	547	4.92715	1.73568	257.259	3.92781
SRR11088393	Hospital Sewage	15.8367	0.504648	0.783706	10.4833	1961643	494	4.66803	1.53675	294.799	3.6058
SRR11088403	Hospital Sewage	10.4318	0.306726	0.73292	4.86708	2836310	557	4.81157	1.64119	245.568	4.20817
SRR11088412	Hospital Sewage	11.5127	0.388101	0.773082	6.98184	1597459	604	4.74727	1.6663	256.586	3.87502
SRR11088421	Hospital Sewage	10.3319	0.332885	0.748577	4.82734	3379415	532	4.79559	1.59743	249.135	4.16807
SRR11088430	Hospital Sewage	9.95349	0.268091	0.700455	4.92689	2228652	541	4.8295	1.59892	213.738	4.5186
SRR11088440	Hospital Sewage	10.3284	0.343227	0.758883	4.77925	1420293	585	4.7316	1.63662	220.641	3.83174
SRR11088455	Hospital Sewage	9.71611	0.308207	0.633068	3.38239	2660470	509	4.80701	1.55845	167.956	4.97352
SRR11088459	Hospital Sewage	11.6074	0.432905	0.76407	9.1174	2165503	511	4.82688	1.60166	235.608	3.93155
SRR11088470	Hospital Sewage	11.0327	0.303862	0.789686	6.57919	2805451	545	4.74527	1.65682	259.718	3.97228
SRR11088480	Hospital Sewage	11.7326	0.337337	0.735597	6.25076	2623396	551	4.89881	1.65316	264.774	4.22681
SRR12917032	Hospital Sewage	11.7199	0.495743	0.856418	7.64581	756400	1011	4.50901	1.76269	254.839	3.18216
SRR12917049	Hospital Sewage	18.007	0.827091	0.805649	14.0218	933921	663	4.73684	1.53336	195.654	4.09923
SRR13003733	Hospital Sewage	6.92415	0.467435	0.745352	3.61554	738036	741	4.29157	1.48734	107.278	4.61209
SRR13003734	Hospital Sewage	7.94365	0.481992	0.792052	4.48023	689816	771	4.30365	1.54503	93.9585	4.54281
SRR13003735	Hospital Sewage	5.32657	0.370799	0.845554	3.51776	728128	1025	3.99179	1.31214	63.1312	5.06479
SRR13003736	Hospital Sewage	11.0154	0.675431	0.838792	6.846	595875	785	4.06903	1.62969	121.532	3.91111
SRR13003737	Hospital Sewage	9.11519	0.549212	0.827523	4.47372	837520	864	4.36052	1.60043	109.554	3.47534
SRR13003738	Hospital Sewage	8.01321	0.49574	0.81335	5.1939	539565	821	4.07611	1.47898	65.654	4.69368
SRR13003739	Hospital Sewage	6.64037	0.40154	0.900012	3.44722	410898	886	3.76243	1.20215	49.643	4.94622
SRR13003740	Hospital Sewage	6.63671	0.467305	0.899674	3.88198	374469	1007	3.561	1.25045	53.3604	4.82714
SRR13003741	Hospital Sewage	10.1344	0.242329	0.904949	7.96613	288856	696	3.12997	1.10605	150.163	0.95331
SRR13003743	Hospital Sewage	8.83641	0.601091	0.915785	3.52651	382609	1243	3.83822	1.24722	46.2426	4.72334
SRR13003744	Hospital Sewage	7.47862	0.480605	0.740414	6.18481	775020	685	4.56523	1.4756	95.4119	4.99365
SRR13003745	Hospital Sewage	4.73604	0.378184	0.731791	6.81976	951873	648	4.36635	1.40168	78.5465	5.27206
SRR13003746	Hospital Sewage	5.65897	0.464805	0.779646	5.81072	914311	747	4.43548	1.43595	93.3578	4.89587
SRR13003747	Hospital Sewage	7.30546	0.596854	0.73104	7.3958	904682	723	4.57943	1.45747	91.4908	4.84453
SRR13003748	Hospital Sewage	8.01628	0.521345	0.885064	3.47148	489094	944	3.83192	1.32254	49.0861	4.73734
SRR13003749	Hospital Sewage	10.2129	0.586462	0.801748	7.05323	780063	792	4.53008	1.578	240.311	3.40202
SRR13003751	Hospital Sewage	11.6022	0.722206	0.816953	10.1806	872273	839	4.60278	1.70268	285.409	3.06465
SRR13003752	Hospital Sewage	11.1717	0.725492	0.81727	8.52563	930336	826	4.68782	1.67905	176.166	3.667
SRR13003753	Hospital Sewage	6.84796	0.408851	0.76674	3.67102	666476	762	4.28516	1.50246	95.6248	4.82337
SRR13003754	Hospital Sewage	7.88614	0.497803	0.779106	4.07789	677950	762	4.22432	1.55104	90.3591	4.52542
SRR13003755	Hospital Sewage	7.43605	0.460952	0.725953	4.24768	867727	772	4.29488	1.48467	127.897	4.19739
SRR13003756	Hospital Sewage	7.90695	0.519268	0.831884	5.47544	596958	871	3.99843	1.44469	58.693	4.80307
SRR20852506	Hospital Sewage	2.8318	0.014594	0.743557	0.535991	2398281	663	2.44652	1.12022	25.9302	5.69619
SRR20852507	Hospital Sewage	2.52452	0.016845	0.7521	0.485359	2077780	690	1.61654	1.07744	22.9243	5.60097
SRR20852508	Hospital Sewage	2.84517	0.012184	0.741244	0.490109	2257008	671	2.33142	1.11549	25.2224	5.68797
SRR20852509	Hospital Sewage	2.47628	0.014782	0.753781	0.462435	2029442	689	1.68039	1.07765	23.9367	5.6315
SRR20852510	Hospital Sewage	3.02747	0.017632	0.740554	0.606393	2268547	668	2.60953	1.11998	27.408	5.65344
SRR20852511	Hospital Sewage	8.86756	0.137873	0.834436	3.58846	1305526	646	4.02204	1.01359	62.067	4.27964
SRR20852512	Hospital Sewage	8.76252	0.146323	0.819481	2.96861	1383903	629	4.07308	1.02746	54.917	4.36686
SRR20852513	Hospital Sewage	9.04409	0.140393	0.817777	4.00398	1299905	641	3.93681	0.984554	67.0235	4.21487
SRR20852514	Hospital Sewage	4.3258	0.031234	0.62874	0.696925	1920984	524	3.14629	1.15366	31.4142	5.88623
SRR20852515	Hospital Sewage	3.95406	0.029437	0.61541	0.725048	1953343	506	3.13193	1.12396	30.7962	5.8976
SRR20852516	Hospital Sewage	3.84649	0.031032	0.632626	0.685158	2094623	514	3.12073	1.17164	31.6454	5.9051
SRR20852517	Hospital Sewage	4.29233	0.024984	0.656382	0.707251	2101308	528	3.16232	1.16495	31.9861	5.88573
SRR20852518	Hospital Sewage	4.77748	0.012216	0.573914	0.599098	2251160	482	3.09071	1.0794	25.0985	5.85438
SRR20852519	Hospital Sewage	4.84465	0.019222	0.598642	0.534589	2210995	487	3.02261	1.11965	27.5848	5.77415
SRR20852520	Hospital Sewage	4.81682	0.020198	0.58833	0.536149	2104118	487	2.95193	1.11497	27.3472	5.78277
SRR20852521	Hospital Sewage	4.58006	0.018501	0.598005	0.47961	1621509	468	2.97353	1.15206	23.7653	5.89111
SRR20852522	Hospital Sewage	4.53521	0.020659	0.612892	0.513578	2178263	482	3.00589	1.13388	25.8804	5.83191
SRR20852523	Hospital Sewage	5.03033	0.01799	0.598908	0.559031	2362473	494	2.99004	1.11007	27.908	5.75605
SRR20852524	Hospital Sewage	9.78916	0.141392	0.831041	3.57918	1361447	644	4.01647	0.9944	62.0734	4.22173
SRR20852525	Hospital Sewage	9.57922	0.139555	0.813747	2.72175	1289795	624	4.1145	1.05091	51.9422	4.53086
SRR22681113	Hospital Sewage	13.8886	0.802903	0.993845	10.0862	547970	636	4.74225	1.66213	193.171	4.53963
SRR22681114	Hospital Sewage	12.3344	0.811989	0.849452	9.43527	547995	692	4.49665	1.69708	189.327	4.42458
SRR22681115	Hospital Sewage	11.8239	0.712263	0.910502	9.08039	463279	856	4.14725	1.62579	266.184	2.93033
SRR22681117	Hospital Sewage	16.4316	0.662769	0.87267	6.04596	505421	836	4.73572	1.68933	160.183	3.33652
SRR22681121	Hospital Sewage	21.5855	1.1052	0.936491	18.3192	352849	1050	4.59743	1.5434	275.516	2.52426
SRR22681122	Hospital Sewage	11.7485	0.557324	0.858749	6.65984	412661	692	3.87248	1.50967	113.234	3.31449
SRR22681123	Hospital Sewage	13.4718	1.24363	0.907578	7.97273	180901	613	4.52379	1.51806	146.584	4.12409
SRR22681124	Hospital Sewage	11.8296	0.617157	0.820827	9.0687	591383	648	4.50838	1.63764	180.862	4.23228
SRR22681125	Hospital Sewage	21.3583	0.692087	0.930198	6.41309	267293	702	4.1027	1.26035	164.015	3.80063
SRR22681127	Hospital Sewage	14.5958	0.45627	0.879045	7.66976	723221	825	4.40273	1.60868	138.945	3.58723
SRR22681130	Hospital Sewage	11.9475	0.808802	0.885912	9.29882	414161	748	4.49777	1.45584	96.4298	4.14876
SRR22681131	Hospital Sewage	19.253	1.08889	0.92414	8.20151	323696	1110	4.51437	1.57802	170.483	2.9843
SRR22681132	Hospital Sewage	12.7778	1.18806	0.950784	12.3808	427112	1063	4.28733	1.50901	208.748	3.84886
SRR22681133	Hospital Sewage	11.6248	0.595808	0.874204	5.95679	809777	790	4.52955	1.68659	168.747	4.34826
SRR22681134	Hospital Sewage	16.1175	0.722556	0.919111	11.3394	629667	790	4.67415	1.60876	220.774	3.54006
SRR22681135	Hospital Sewage	27.4987	0.822593	0.960154	9.07914	303886	842	3.9829	1.16849	195.175	3.88026
SRR22681136	Hospital Sewage	29.3702	0.907748	0.95004	8.60329	294657	823	4.05865	1.16083	190.26	3.89555
SRR22681137	Hospital Sewage	8.50438	0.342469	0.808118	3.88534	686168	663	4.15211	1.24962	66.9177	5.09652
SRR22681138	Hospital Sewage	16.8526	0.628294	0.96287	6.41659	648543	778	4.77695	1.65755	169.684	3.97686
SRR22681139	Hospital Sewage	9.76473	0.307701	0.862206	12.2738	771831	534	4.47263	1.55492	145.949	3.50822
SRR22681141	Hospital Sewage	11.8101	0.872938	0.885411	7.93877	587056	810	4.76995	1.72594	161.384	4.65862
SRR22681142	Hospital Sewage	21.6783	1.03441	0.842136	12.729	401159	731	4.65072	1.37924	187.018	3.3573
SRR22681143	Hospital Sewage	16.9079	0.856585	0.856481	9.67165	493203	755	4.78495	1.63148	157.901	3.72396
SRR22681146	Hospital Sewage	16.8156	0.598226	0.855459	11.6838	505640	726	4.70615	1.57314	189.756	4.11679
SRR22681147	Hospital Sewage	13.7005	0.392738	0.768864	3.55631	585608	664	4.55844	1.52093	105.223	4.97994
SRR22681148	Hospital Sewage	17.2184	0.475831	0.904964	5.69837	236415	1168	3.95041	1.23892	110.224	4.34143
SRR22681149	Hospital Sewage	18.7558	0.759661	0.836308	8.02042	579168	780	4.84319	1.66461	149.618	3.66887
SRR22681151	Hospital Sewage	11.8647	0.218109	0.850891	2.85337	584556	788	4.19174	1.33845	95.8377	4.63652

## Sheet: Table S6
Table S6: Number of samples removed due to zero crAssphage or sul1 abundance.
	CrAssphage analysis		Sul1 analysis
Environment	Number of samples removed	Percentage of samples removed	Number of samples removed	Percentage of samples removed	Total number of samples
Soil	103	96.26	103	96.26	107
Sediment	74	85.06	70	80.46	87
Activated Sludge	0	0	0	0	109
Surface Water	36	21.69	23	13.86	166
Wastewater Effluent	13	12.26	5	4.72	106
Wastewater Influent	0	0	0	0	116
Hospital Sewage	2	1.55	0	0	129
Pig Feces	64	62.75	53	51.96	102
Cow Manure	69	71.13	80	82.47	97
Chicken Feces	65	75.58	32	37.21	86
Migratory Bird Droppings	90	76.92	84	71.79	117
Human Gut	40	38.46	67	64.42	104

## Sheet: Table S7
Table S7: Crassphage and Sul1 abundance across all samples.
Sample	Environment	Crassphage Abundance	Sul1 Abundance
SRR14932477	Activated Sludge	0.543162	63.606
SRR14932478	Activated Sludge	0.539824	66.25
SRR14932479	Activated Sludge	1.84092	249.661
SRR14932482	Activated Sludge	1.43443	66.0405
SRR14932483	Activated Sludge	0.308659	50.6512
SRR14932484	Activated Sludge	3.32372	1.88095
SRR14932488	Activated Sludge	0.282646	43.9155
SRR14932490	Activated Sludge	1.01772	91.9917
SRR14932500	Activated Sludge	1.3505	32.7298
SRR14932501	Activated Sludge	2.80168	21.1845
SRR14932502	Activated Sludge	0.0354917	16.8655
SRR14932503	Activated Sludge	1.42634	23.4452
SRR14932505	Activated Sludge	1.43084	25.156
SRR14932512	Activated Sludge	2.89276	12.981
SRR14932515	Activated Sludge	5.31141	79.7012
SRR14932517	Activated Sludge	3.18456	49.0976
SRR14932518	Activated Sludge	3.38532	58.431
SRR14932520	Activated Sludge	1.48602	25.8845
SRR14932521	Activated Sludge	2.98916	24.8429
SRR14932524	Activated Sludge	3.28455	33.8333
SRR14932525	Activated Sludge	1.50859	24.2738
SRR14932530	Activated Sludge	3.6895	52.4321
SRR14932531	Activated Sludge	1.85219	27.2964
SRR14932532	Activated Sludge	2.46486	43.8262
SRR14932538	Activated Sludge	2.65751	32.6345
SRR14932539	Activated Sludge	1.53796	50.4476
SRR14932540	Activated Sludge	1.53312	43.6619
SRR14932541	Activated Sludge	2.01204	53.0179
SRR14932542	Activated Sludge	1.55716	38.4595
SRR14932543	Activated Sludge	1.77092	23.4333
SRR14932544	Activated Sludge	2.15359	31.6607
SRR14932545	Activated Sludge	2.36124	29.0214
SRR14932546	Activated Sludge	3.00004	49.2905
SRR14932547	Activated Sludge	2.40976	45.8167
SRR14932548	Activated Sludge	3.77532	17.9095
SRR14932549	Activated Sludge	1.7654	49.9881
SRR14932550	Activated Sludge	2.36928	21.419
SRR14932551	Activated Sludge	1.93606	23.756
SRR14932556	Activated Sludge	3.19061	24.3738
SRR14932558	Activated Sludge	2.8676	37.4321
SRR14932560	Activated Sludge	2.53728	19.2357
SRR14932561	Activated Sludge	1.96715	41.3488
SRR14932567	Activated Sludge	2.26277	81.1619
SRR14932568	Activated Sludge	2.47609	28.8667
SRR14932571	Activated Sludge	2.31786	97.6524
SRR14932572	Activated Sludge	2.1694	91.9857
SRR14932574	Activated Sludge	3.53926	39.4238
SRR14932575	Activated Sludge	5.27925	37.0869
SRR14932576	Activated Sludge	2.38795	40.3905
SRR14932577	Activated Sludge	3.12701	76.769
SRR14932579	Activated Sludge	3.4166	26.9131
SRR14932580	Activated Sludge	3.58619	24.1893
SRR14932582	Activated Sludge	0.817123	49.5798
SRR14932584	Activated Sludge	1.38522	15.5429
SRR14932585	Activated Sludge	0.84022	46.175
SRR14932589	Activated Sludge	2.20513	72.8226
SRR14932595	Activated Sludge	3.0745	30.5131
SRR14932597	Activated Sludge	2.89711	110.296
SRR14932598	Activated Sludge	4.42463	45.9881
SRR14932600	Activated Sludge	1.60444	30.5643
SRR14932601	Activated Sludge	1.59269	25.5583
SRR14932602	Activated Sludge	11.7096	24.2762
SRR14932604	Activated Sludge	0.0237161	43.756
SRR14932607	Activated Sludge	4.36696	55.3738
SRR14932616	Activated Sludge	3.37945	12.2726
SRR14932617	Activated Sludge	2.01498	43.4726
SRR14932619	Activated Sludge	1.52216	53.8107
SRR14932624	Activated Sludge	0.72846	31.8512
SRR14932626	Activated Sludge	2.00303	16.1167
SRR14932628	Activated Sludge	4.07718	27.35
SRR14932629	Activated Sludge	1.10036	72.0869
SRR14932630	Activated Sludge	2.75303	42.6095
SRR14932632	Activated Sludge	2.38214	55.6119
SRR14932633	Activated Sludge	1.62619	25.6881
SRR14932634	Activated Sludge	0.0601453	25.3595
SRR14932635	Activated Sludge	2.14295	7.92738
SRR14932644	Activated Sludge	0.713573	70.4619
SRR14932645	Activated Sludge	0.554721	110.33
SRR14932646	Activated Sludge	0.378757	46.8357
SRR14932656	Activated Sludge	3.27975	72.4417
SRR14932659	Activated Sludge	3.7202	131.58
SRR14932660	Activated Sludge	4.02112	139.746
SRR14932661	Activated Sludge	1.60126	86.331
SRR14932662	Activated Sludge	0.531943	41.1798
SRR14932663	Activated Sludge	0.572513	45.0869
SRR14932664	Activated Sludge	4.31413	104.452
SRR14932666	Activated Sludge	0.706248	59.081
SRR14932668	Activated Sludge	0.760006	91.7464
SRR14932669	Activated Sludge	1.5002	66.9155
SRR14932670	Activated Sludge	1.2873	106.86
SRR14932671	Activated Sludge	0.957791	81.3607
SRR14932673	Activated Sludge	1.38092	82.8262
SRR14932675	Activated Sludge	0.925215	88.525
SRR14932677	Activated Sludge	0.714933	24.35
SRR14932678	Activated Sludge	0.638222	24.931
SRR14932679	Activated Sludge	0.878957	12.925
SRR14932680	Activated Sludge	0.916025	14.8988
SRR14932681	Activated Sludge	1.03567	11.1417
SRR14932682	Activated Sludge	1.43224	39.9667
SRR14932684	Activated Sludge	1.8382	20.1929
SRR14932685	Activated Sludge	1.80354	22.5024
SRR14932686	Activated Sludge	2.82045	28.7
SRR14932687	Activated Sludge	0.731355	81.469
SRR14932693	Activated Sludge	0.962705	34.6774
SRR14932695	Activated Sludge	0.917231	40.9202
SRR14932697	Activated Sludge	0.413795	36.1976
SRR14932699	Activated Sludge	0.258466	39.1464
SRR14932700	Activated Sludge	1.41425	38.319
SRR14932702	Activated Sludge	0.670036	68.6679
ERR4191852	Chicken Feces	0	0.359524
ERR4191853	Chicken Feces	0.0124453	6.06667
ERR4191854	Chicken Feces	1.44918	14.9262
ERR4191855	Chicken Feces	115.371	1.79762
ERR4191856	Chicken Feces	0	1.4381
ERR4191857	Chicken Feces	0.00622263	1.07143
ERR4191859	Chicken Feces	0	22.6012
ERR4191860	Chicken Feces	0.00311132	195.094
ERR4191861	Chicken Feces	0	0
ERR4191863	Chicken Feces	0	6.70833
ERR4191864	Chicken Feces	106.301	2.14405
ERR4191865	Chicken Feces	0.00311132	8.62262
ERR4191866	Chicken Feces	7.13975	51.1571
ERR4191868	Chicken Feces	0.0124453	138.338
ERR4191870	Chicken Feces	0	41.4464
ERR4191873	Chicken Feces	0.00621233	9.25119
ERR4191875	Chicken Feces	0.00311132	0
ERR4191876	Chicken Feces	82.3586	3.23571
ERR4191877	Chicken Feces	66.1727	3.95476
ERR4191878	Chicken Feces	16.403	17.194
ERR4191880	Chicken Feces	0.0248905	54.7667
ERR4191881	Chicken Feces	0	11.0155
SRR10897114	Chicken Feces	0	0
SRR10897115	Chicken Feces	0	0
SRR10897116	Chicken Feces	0	0
SRR10897117	Chicken Feces	0	0
SRR12730714	Chicken Feces	0.000700561	0
SRR12730716	Chicken Feces	0	2.12024
SRR12730717	Chicken Feces	0.000309071	1.79405
SRR12730718	Chicken Feces	0.000309071	15.3143
SRR12730723	Chicken Feces	0	0
SRR12730725	Chicken Feces	0	0.359524
SRR12730726	Chicken Feces	0	0
SRR12730727	Chicken Feces	0	0
SRR12730730	Chicken Feces	0.000638747	27.6417
SRR12730731	Chicken Feces	0	1.79762
SRR12730732	Chicken Feces	0	1.79762
SRR12730735	Chicken Feces	0	16.3179
SRR12730736	Chicken Feces	0.00039149	1.69286
SRR12730737	Chicken Feces	0	2.66429
SRR12730738	Chicken Feces	0.000721166	8.25714
SRR13089990	Chicken Feces	0	155.507
SRR13089992	Chicken Feces	0	172.794
SRR13089993	Chicken Feces	0	85.7321
SRR13089994	Chicken Feces	0	13.5179
SRR13089995	Chicken Feces	0	4.94048
SRR13089997	Chicken Feces	0	7.80952
SRR13089998	Chicken Feces	0	2.13333
SRR13089999	Chicken Feces	0	168.743
SRR13090000	Chicken Feces	0	53.6786
SRR13090001	Chicken Feces	0	1352.85
SRR13090003	Chicken Feces	0	14.6048
SRR13090004	Chicken Feces	0	1.05833
SRR13783083	Chicken Feces	0	9.84048
SRR13783084	Chicken Feces	0	2.5
SRR13783085	Chicken Feces	0	1.07143
SRR13783087	Chicken Feces	0	4.19643
SRR13783088	Chicken Feces	0	5
SRR13783090	Chicken Feces	0	3.21429
SRR9113691	Chicken Feces	0	0
SRR9113696	Chicken Feces	0	0
SRR9113698	Chicken Feces	0	0.357143
SRR9113699	Chicken Feces	0	18.569
SRR9113702	Chicken Feces	0	0
SRR9113704	Chicken Feces	0	0
SRR9113705	Chicken Feces	0	0
SRR9113706	Chicken Feces	0	0
SRR9113707	Chicken Feces	0	0
SRR9113708	Chicken Feces	0	3.49881
SRR9113710	Chicken Feces	0	0
SRR9113711	Chicken Feces	0	0
SRR9113712	Chicken Feces	0	0
SRR9113713	Chicken Feces	0	4.89167
SRR9113714	Chicken Feces	0	0
SRR9113716	Chicken Feces	0	0
SRR9113722	Chicken Feces	0	0
SRR9113723	Chicken Feces	0	0
SRR9113724	Chicken Feces	0	0
SRR9113725	Chicken Feces	0	0
SRR9113726	Chicken Feces	0	0
SRR9113728	Chicken Feces	0	0
SRR9113729	Chicken Feces	0	0
SRR9113731	Chicken Feces	0	3.50357
SRR9113735	Chicken Feces	0	0
SRR9113736	Chicken Feces	0	0
SRR9113737	Chicken Feces	0	0
ERR3220178	Cow Manure	0	0
ERR3220183	Cow Manure	0	0
ERR3220184	Cow Manure	0	0
ERR3220203	Cow Manure	0	0
ERR3220204	Cow Manure	0	0
ERR3220205	Cow Manure	0	0
ERR3220206	Cow Manure	0	0
ERR3220207	Cow Manure	0	0
ERR3220208	Cow Manure	0	0
ERR3220209	Cow Manure	0	0
ERR3220210	Cow Manure	0	0
ERR3220211	Cow Manure	0	0
ERR3220212	Cow Manure	0	0
ERR3220213	Cow Manure	0	0
ERR3220214	Cow Manure	0	0
ERR3220216	Cow Manure	0	0
ERR3220218	Cow Manure	0	0
ERR3220219	Cow Manure	0	0
ERR3220220	Cow Manure	0	0
ERR5671698	Cow Manure	0	0
ERR5671704	Cow Manure	0.000309071	0
ERR5671705	Cow Manure	0	0
ERR5671706	Cow Manure	0	0
ERR5671722	Cow Manure	0	0
ERR5683758	Cow Manure	0	0
ERR5683760	Cow Manure	0	0
SRR10098297	Cow Manure	0.00211199	0.579762
SRR10098298	Cow Manure	0.00132901	2.86905
SRR10098299	Cow Manure	0.00246227	2.35714
SRR10098300	Cow Manure	0.000309071	1.07619
SRR10098306	Cow Manure	0.00060784	26.9952
SRR10098317	Cow Manure	0.000453304	0
SRR10098322	Cow Manure	0.00100963	3.58452
SRR10098324	Cow Manure	0.000669654	0
SRR10765500	Cow Manure	0	0
SRR10765501	Cow Manure	0	0
SRR10765502	Cow Manure	0	0
SRR10765503	Cow Manure	0	0
SRR10765504	Cow Manure	0	1.4381
SRR10765505	Cow Manure	0	0
SRR10765506	Cow Manure	0	0.359524
SRR10765507	Cow Manure	0	0
SRR11038085	Cow Manure	0	0
SRR13343629	Cow Manure	0	0
SRR13343630	Cow Manure	0	0
SRR13343631	Cow Manure	0	0
SRR13343632	Cow Manure	0.00311132	0
SRR13343633	Cow Manure	0	0
SRR13343634	Cow Manure	0	0
SRR13343635	Cow Manure	0.00622263	0
SRR13343636	Cow Manure	0	0
SRR13343637	Cow Manure	0	0
SRR14423985	Cow Manure	0	0
SRR14423987	Cow Manure	0	0
SRR14423989	Cow Manure	0.105599	0
SRR14423990	Cow Manure	0	1.50476
SRR14423991	Cow Manure	0	0
SRR14423992	Cow Manure	0.0285582	0.280952
SRR14423995	Cow Manure	0	0
SRR14423999	Cow Manure	0	18.0393
SRR14424000	Cow Manure	0.263061	0
SRR14424001	Cow Manure	0.205058	0
SRR14424002	Cow Manure	0	0
SRR14424003	Cow Manure	0.237243	0
SRR14424005	Cow Manure	0.0385515	0
SRR14424006	Cow Manure	0.0955854	0
SRR14424009	Cow Manure	0.177634	0.395238
SRR14424010	Cow Manure	0	0.359524
SRR14424011	Cow Manure	0	0
SRR17191898	Cow Manure	0	0.357143
SRR17191900	Cow Manure	0	0.357143
SRR17191903	Cow Manure	0	0
SRR17191907	Cow Manure	0	0.940476
SRR22328605	Cow Manure	0	0
SRR6425778	Cow Manure	0	0
SRR6425779	Cow Manure	0.00208108	0
SRR6425780	Cow Manure	0.00208108	0
SRR6425781	Cow Manure	0.00207078	0
SRR6425814	Cow Manure	0	0
SRR6425815	Cow Manure	0	0
SRR7686593	Cow Manure	0.0174213	0
SRR7686596	Cow Manure	0.00309071	0.359524
SRR7686597	Cow Manure	0.0274455	0
SRR7686600	Cow Manure	0.0479988	0
SRR7686601	Cow Manure	0.159955	0
SRR7686604	Cow Manure	0.122732	0
SRR8591572	Cow Manure	0	0
SRR8591573	Cow Manure	0	0
SRR8591574	Cow Manure	0	0
SRR8591575	Cow Manure	0	0
SRR8591576	Cow Manure	0	0
SRR8591577	Cow Manure	0	0
SRR8591578	Cow Manure	0	0
SRR8591579	Cow Manure	0	0
SRR8591580	Cow Manure	0	0
SRR8591581	Cow Manure	0	0
SRR8591583	Cow Manure	0	0
ERR1414257	Wastewater Effluent	0.0477206	11.1357
ERR1414258	Wastewater Effluent	0.124432	18.3024
ERR1414259	Wastewater Effluent	0.177304	24.9381
ERR1414260	Wastewater Effluent	0.233081	25.4929
ERR1414261	Wastewater Effluent	0.213352	14.4048
ERR1414262	Wastewater Effluent	0.228198	13.9881
ERR1414263	Wastewater Effluent	0.313409	8.31786
ERR1414264	Wastewater Effluent	0.357966	10.1452
ERR1414265	Wastewater Effluent	0.199887	38.7083
ERR1661352	Wastewater Effluent	0.0222325	5.00238
ERR1661353	Wastewater Effluent	0.0369649	6.19048
ERR3569147	Wastewater Effluent	0.00113326	14.369
SRR11567528	Wastewater Effluent	1.1731	106.696
SRR12486993	Wastewater Effluent	0.127512	27.9202
SRR12486996	Wastewater Effluent	0.603359	80.3869
SRR12486999	Wastewater Effluent	0.121156	38.1476
SRR12487003	Wastewater Effluent	0.00933395	35.1202
SRR12487006	Wastewater Effluent	0.363777	175.988
SRR12487009	Wastewater Effluent	0	114.751
SRR12487013	Wastewater Effluent	0.0591047	71.931
SRR12487014	Wastewater Effluent	0.0964096	27.1821
SRR12487018	Wastewater Effluent	0	75.5429
SRR12487022	Wastewater Effluent	0.739432	235.31
SRR12487026	Wastewater Effluent	0	42.2643
SRR12487029	Wastewater Effluent	0	88.9024
SRR12487032	Wastewater Effluent	0	91.8048
SRR12487036	Wastewater Effluent	0.0777726	284.265
SRR12487039	Wastewater Effluent	0	5.03333
SRR12487042	Wastewater Effluent	0.177335	22.1738
SRR12487046	Wastewater Effluent	1.47565	58.069
SRR13355620	Wastewater Effluent	0.061227	5.90238
SRR13355621	Wastewater Effluent	0.0906712	8.32857
SRR13355622	Wastewater Effluent	0.0867666	10.794
SRR13503351	Wastewater Effluent	9.1554	108.739
SRR13503352	Wastewater Effluent	19.2111	138.575
SRR13612670	Wastewater Effluent	0.0309071	4.9869
SRR13612672	Wastewater Effluent	0.608252	65.6952
SRR13612674	Wastewater Effluent	0.0185443	11.6893
SRR13612676	Wastewater Effluent	0.00618142	31.7393
SRR13612678	Wastewater Effluent	0.707165	17.7929
SRR13612680	Wastewater Effluent	0.175985	21.406
SRR14493010	Wastewater Effluent	0.219265	26.0238
SRR14493015	Wastewater Effluent	1.07197	35.1262
SRR14800548	Wastewater Effluent	0.0341009	28.1952
SRR14800551	Wastewater Effluent	0.00923093	16.4821
SRR14800554	Wastewater Effluent	0.0561582	3.2131
SRR17549183	Wastewater Effluent	0.00923093	16.4821
SRR17549186	Wastewater Effluent	0.0561582	3.2131
SRR22752010	Wastewater Effluent	6.9822	23.306
SRR22752014	Wastewater Effluent	3.11811	23.9952
SRR22752015	Wastewater Effluent	4.78186	24.0333
SRR22752025	Wastewater Effluent	3.48644	27.2357
SRR22752039	Wastewater Effluent	6.32774	27.9167
SRR22752040	Wastewater Effluent	6.13725	26.4893
SRR22752041	Wastewater Effluent	7.51618	31.8048
SRR22752045	Wastewater Effluent	5.42851	21.9095
SRR22752046	Wastewater Effluent	5.64301	32.5833
SRR6231133	Wastewater Effluent	0.494195	61.1381
SRR6231146	Wastewater Effluent	0.885808	100.658
SRR6231147	Wastewater Effluent	0.64326	13.5607
SRR6231156	Wastewater Effluent	0.7138	16.7036
SRR6231160	Wastewater Effluent	10.3632	72.4726
SRR6231170	Wastewater Effluent	0.167795	16.7107
SRR6231172	Wastewater Effluent	0.303807	127.502
SRR6231173	Wastewater Effluent	0.262772	229.232
SRR6231175	Wastewater Effluent	0.480379	15.7333
SRR6231180	Wastewater Effluent	0.0618142	38.744
SRR6231188	Wastewater Effluent	0.417349	12.9262
SRR6231203	Wastewater Effluent	0.205522	30.4321
SRR6231204	Wastewater Effluent	0.4242	15.5464
SRR6231211	Wastewater Effluent	15.0744	62.7679
SRR6837555	Wastewater Effluent	3.4282	177.6
SRR6837556	Wastewater Effluent	0.111698	108.364
SRR6837557	Wastewater Effluent	1.92477	19.1
SRR6837564	Wastewater Effluent	2.57009	38.7024
SRR6837565	Wastewater Effluent	0	21.3107
SRR6837566	Wastewater Effluent	2.60708	75.3167
SRR6837570	Wastewater Effluent	3.86333	48.1976
SRR6837571	Wastewater Effluent	4.56018	104.283
SRR6837572	Wastewater Effluent	0.0103436	166.724
SRR6837575	Wastewater Effluent	2.15959	36.406
SRR6837577	Wastewater Effluent	1.27498	33.4071
SRR6837578	Wastewater Effluent	0.0155154	150.776
SRR6837583	Wastewater Effluent	3.90132	24.1
SRR6837584	Wastewater Effluent	0.0107351	145.96
SRR7877878	Wastewater Effluent	0	0
SRR7877879	Wastewater Effluent	1.27177	46.9548
SRR7877880	Wastewater Effluent	0	0
SRR7877881	Wastewater Effluent	0	0
SRR7877882	Wastewater Effluent	0	0
SRR7877883	Wastewater Effluent	0	0
SRR7877885	Wastewater Effluent	2.76388	5.34762
SRR7877886	Wastewater Effluent	0	0.314286
SRR8206192	Wastewater Effluent	1.7008	67.4905
SRR8208346	Wastewater Effluent	0.0956575	58.3286
SRR8208349	Wastewater Effluent	3.27771	102.151
SRR8715494	Wastewater Effluent	39.7894	40.9524
SRR8715496	Wastewater Effluent	1.27448	98.7452
SRR8870486	Wastewater Effluent	0.0164838	642.846
SRR8870488	Wastewater Effluent	0.0379539	843.869
SRR8893620	Wastewater Effluent	0.0556122	28.5202
SRR8893621	Wastewater Effluent	0.0989028	42.7238
SRR8893622	Wastewater Effluent	0.116407	57.5964
SRR8893623	Wastewater Effluent	0.0896101	25.3524
SRR8893624	Wastewater Effluent	0.0185443	25.6048
SRR8893625	Wastewater Effluent	0.0123628	15.6226
ERR11269298	Hospital Sewage	376.898	1961.1
ERR11269302	Hospital Sewage	82.673	684.187
ERR11269309	Hospital Sewage	82.9508	1338.81
ERR3519521	Hospital Sewage	688.258	341.37
ERR3519522	Hospital Sewage	51.0902	2253.25
ERR3519523	Hospital Sewage	23.3786	77.4762
ERR3519524	Hospital Sewage	37.1863	1145.5
ERR3519526	Hospital Sewage	264.822	513.57
ERR3519527	Hospital Sewage	280.548	867.158
ERR7015328	Hospital Sewage	1.19929	918.625
ERR7015329	Hospital Sewage	1.45734	723.295
ERR7015330	Hospital Sewage	7.295	727.218
ERR7015343	Hospital Sewage	1.85654	1011.51
ERR7015344	Hospital Sewage	2.02728	839.031
ERR7015345	Hospital Sewage	0.676516	812.381
ERR7015346	Hospital Sewage	19.0977	329.577
ERR7015347	Hospital Sewage	0.109288	316.801
ERR7015348	Hospital Sewage	4.6735	2005.46
ERR7015350	Hospital Sewage	3.38529	2173.42
ERR7015351	Hospital Sewage	15.6631	397.555
ERR7015362	Hospital Sewage	0.259908	352.269
ERR7015367	Hospital Sewage	0.0295472	854.021
ERR7015368	Hospital Sewage	0.0406944	676.036
ERR7015369	Hospital Sewage	0.330191	303.93
ERR7015373	Hospital Sewage	0.787926	1526.19
ERR7015374	Hospital Sewage	0.0254057	10.4976
ERR7015375	Hospital Sewage	0.0659146	949.101
ERR7015376	Hospital Sewage	1.31906	709.686
ERR7015379	Hospital Sewage	8.15754	554.471
ERR7015380	Hospital Sewage	3.16052	708.957
ERR7015385	Hospital Sewage	0.0989852	626.498
ERR7015387	Hospital Sewage	4.70169	528.769
ERR7015389	Hospital Sewage	3.17472	289.013
ERR7015390	Hospital Sewage	2.25457	548.711
ERR7015391	Hospital Sewage	0.412713	185.493
ERR7015393	Hospital Sewage	0.0903209	261.154
ERR7015394	Hospital Sewage	0.0247463	605.598
ERR7015395	Hospital Sewage	36.0126	513.923
ERR7015397	Hospital Sewage	6.84541	65.2226
ERR7015398	Hospital Sewage	0.172482	163.756
ERR7015399	Hospital Sewage	0.159553	10.1905
ERR7015400	Hospital Sewage	3.43276	23.4405
ERR7015401	Hospital Sewage	20.0381	83.0155
ERR7015402	Hospital Sewage	14.5184	59.0905
ERR7015403	Hospital Sewage	0.252923	106.098
SRR11088386	Hospital Sewage	54.3327	876.857
SRR11088387	Hospital Sewage	50.9321	538.486
SRR11088393	Hospital Sewage	20.2978	377.57
SRR11088403	Hospital Sewage	132.411	167.862
SRR11088412	Hospital Sewage	237.966	369.726
SRR11088421	Hospital Sewage	121.374	80.4202
SRR11088430	Hospital Sewage	293.996	83.4726
SRR11088440	Hospital Sewage	70.8149	157.819
SRR11088455	Hospital Sewage	42.0312	63.5488
SRR11088459	Hospital Sewage	65.699	740.081
SRR11088470	Hospital Sewage	605.104	292.896
SRR11088480	Hospital Sewage	242.699	219.052
SRR12917032	Hospital Sewage	48.5292	206.523
SRR12917049	Hospital Sewage	2.65338	359.585
SRR13003733	Hospital Sewage	16.7044	222.018
SRR13003734	Hospital Sewage	17.1608	151.004
SRR13003735	Hospital Sewage	5.15316	394.677
SRR13003736	Hospital Sewage	15.6416	193.62
SRR13003737	Hospital Sewage	19.949	225.449
SRR13003738	Hospital Sewage	7.02016	490.889
SRR13003739	Hospital Sewage	3.89944	305.256
SRR13003740	Hospital Sewage	1.84646	317.97
SRR13003741	Hospital Sewage	0.142132	16.7857
SRR13003743	Hospital Sewage	3.59394	422.194
SRR13003744	Hospital Sewage	22.4216	200.796
SRR13003745	Hospital Sewage	12.7052	346.245
SRR13003746	Hospital Sewage	32.621	245.738
SRR13003747	Hospital Sewage	42.2672	479.008
SRR13003748	Hospital Sewage	5.41965	377.227
SRR13003749	Hospital Sewage	25.9481	148.889
SRR13003751	Hospital Sewage	32.2027	248.454
SRR13003752	Hospital Sewage	21.7565	273.154
SRR13003753	Hospital Sewage	14.8378	230.657
SRR13003754	Hospital Sewage	16.0609	124.598
SRR13003755	Hospital Sewage	66.9634	135.195
SRR13003756	Hospital Sewage	7.12343	726.755
SRR20852506	Hospital Sewage	0.0345748	12.5167
SRR20852507	Hospital Sewage	0.0497811	11.4869
SRR20852508	Hospital Sewage	0.0248802	12.2095
SRR20852509	Hospital Sewage	0.0590841	8.51548
SRR20852510	Hospital Sewage	0.015536	13.2488
SRR20852511	Hospital Sewage	0.30221	432.18
SRR20852512	Hospital Sewage	0.31449	423.223
SRR20852513	Hospital Sewage	0.298336	384.21
SRR20852514	Hospital Sewage	0.0158657	47.9964
SRR20852515	Hospital Sewage	0.0528924	48.9107
SRR20852516	Hospital Sewage	0.0373358	36.7976
SRR20852517	Hospital Sewage	0.0283212	65.0024
SRR20852518	Hospital Sewage	0	37.981
SRR20852519	Hospital Sewage	0.0317519	25.056
SRR20852520	Hospital Sewage	0.018977	23.6369
SRR20852521	Hospital Sewage	0.0528924	17.144
SRR20852522	Hospital Sewage	0.0493484	29.4
SRR20852523	Hospital Sewage	0.0501108	23.8952
SRR20852524	Hospital Sewage	0.205244	480.863
SRR20852525	Hospital Sewage	0.229115	492.467
SRR22681113	Hospital Sewage	48.9536	2661.74
SRR22681114	Hospital Sewage	0.142461	993.862
SRR22681115	Hospital Sewage	1.40756	770.515
SRR22681117	Hospital Sewage	9.27623	201.661
SRR22681121	Hospital Sewage	2.08218	1831.12
SRR22681122	Hospital Sewage	0.667934	172.604
SRR22681123	Hospital Sewage	284.344	583.825
SRR22681124	Hospital Sewage	27.2689	1341.19
SRR22681125	Hospital Sewage	0.146706	713.814
SRR22681127	Hospital Sewage	3.73163	1581.61
SRR22681130	Hospital Sewage	2.16481	722
SRR22681131	Hospital Sewage	0.0679957	56.6369
SRR22681132	Hospital Sewage	0.0587235	781.083
SRR22681133	Hospital Sewage	1.30235	629.5
SRR22681134	Hospital Sewage	0.342389	817.656
SRR22681135	Hospital Sewage	0.00309071	1045.39
SRR22681136	Hospital Sewage	0.00309071	663.457
SRR22681137	Hospital Sewage	0	253.765
SRR22681138	Hospital Sewage	1.59984	424.525
SRR22681139	Hospital Sewage	0.0153505	168.01
SRR22681141	Hospital Sewage	0.40853	398.818
SRR22681142	Hospital Sewage	0.635492	1052.69
SRR22681143	Hospital Sewage	7.51288	369.236
SRR22681146	Hospital Sewage	7.80091	297.281
SRR22681147	Hospital Sewage	0.377974	211.613
SRR22681148	Hospital Sewage	0.0996755	832.456
SRR22681149	Hospital Sewage	15.5717	287.104
SRR22681151	Hospital Sewage	0.152825	216.681
ERR247139	Human Gut	0	0
ERR260171	Human Gut	0.0873332	0
ERR260263	Human Gut	0.0369443	0
ERR260267	Human Gut	0.00832432	0
ERR2619708	Human Gut	0	1.68333
ERR2619712	Human Gut	0	0
ERR2619719	Human Gut	0	6.34881
ERR2619728	Human Gut	0	3.96667
ERR2619732	Human Gut	0	0
ERR2619737	Human Gut	0	0.240476
ERR2619741	Human Gut	0	0.961905
ERR2619742	Human Gut	0	0
ERR2619743	Human Gut	0	0.227381
ERR2619747	Human Gut	0.00208108	0.480952
ERR2619753	Human Gut	0	0.721429
ERR2619755	Human Gut	0	1.44286
ERR2619760	Human Gut	0	41.8167
ERR2619762	Human Gut	0	0.240476
ERR2619763	Human Gut	0	22.9131
ERR414265	Human Gut	0	0
ERR414285	Human Gut	0.00179261	2.2631
ERR414291	Human Gut	0.112966	1.0131
ERR414302	Human Gut	13.3755	0
ERR414305	Human Gut	0	0
ERR414308	Human Gut	0.0103024	0
ERR414318	Human Gut	0	0
ERR414319	Human Gut	2.58386	0
ERR414421	Human Gut	0.009983	0
ERR414453	Human Gut	0.053562	0
ERR414475	Human Gut	0.0279606	0
ERR414493	Human Gut	0.0588987	0
ERR414496	Human Gut	19.0087	0
ERR414497	Human Gut	0.209715	5.99762
ERR479161	Human Gut	0.00558389	0
ERR479327	Human Gut	0.0237367	0
ERR505083	Human Gut	0	0
ERR505084	Human Gut	0.307474	0
ERR505085	Human Gut	1084.31	0
ERR505086	Human Gut	110.603	0
ERR505087	Human Gut	0	0
ERR505093	Human Gut	0.00411065	0
ERR505097	Human Gut	65.3377	0
ERR505099	Human Gut	0.00203987	0
ERR505103	Human Gut	0	0
ERR505104	Human Gut	0.0246227	0
ERR505105	Human Gut	38.9755	0
ERR505106	Human Gut	169.753	0
ERR748156	Human Gut	52.9262	0
SRR061169	Human Gut	2.31912	0
SRR061494	Human Gut	0.000865399	0
SRR1761679	Human Gut	0.00595477	0
SRR1761680	Human Gut	20.7139	0
SRR1761682	Human Gut	0	0
SRR1761685	Human Gut	0	0
SRR1761688	Human Gut	0	0
SRR1761692	Human Gut	0.0138979	0.0702381
SRR1761695	Human Gut	0.0039046	0
SRR1761699	Human Gut	0	0
SRR1761704	Human Gut	0	0
SRR1761705	Human Gut	0.00156596	0
SRR1761708	Human Gut	0	0
SRR1761711	Human Gut	0	0
SRR1761712	Human Gut	0	0
SRR1761715	Human Gut	0	0
SRR1761717	Human Gut	0.0303611	0.264286
SRR1929408	Human Gut	0	1.0869
SRR1930121	Human Gut	0.000309071	0
SRR1930141	Human Gut	0.00205017	0
SRR1931173	Human Gut	0.381425	0
SRR341632	Human Gut	73.0382	0.347619
SRR341633	Human Gut	785.546	1.06429
SRR3992955	Human Gut	0.1179	0
SRR3992956	Human Gut	0.00927214	0
SRR3992974	Human Gut	3.03704	0
SRR3992976	Human Gut	0.12026	0
SRR3992979	Human Gut	0.0034822	17.119
SRR3992981	Human Gut	0.81091	5.18571
SRR3992983	Human Gut	0.245691	0
SRR3992984	Human Gut	177.118	1.66667
SRR3992992	Human Gut	0.26986	0.80119
SRR3992994	Human Gut	1.44747	0
SRR3992995	Human Gut	0.209901	2.85714
SRR3993011	Human Gut	0.0237367	0
SRR3993029	Human Gut	4.19772	0.714286
SRR3993036	Human Gut	22.3355	1.07143
SRR3993038	Human Gut	0.796837	1.42857
SRR3993039	Human Gut	0.291289	0
SRR3993041	Human Gut	0.0766703	1.07143
SRR3993044	Human Gut	0.279266	0.357143
SRR4305530	Human Gut	0	0
SRR4408001	Human Gut	0.00394581	0
SRR7658581	Human Gut	0.0137228	0.239286
SRR7658622	Human Gut	0	2.99881
SRR7658627	Human Gut	0	257.961
SRR7658639	Human Gut	0.00415186	0
SRR7658652	Human Gut	0.00413125	14.4024
SRR7658659	Human Gut	0	0.220238
SRR7658661	Human Gut	0.00208108	3.58452
SRR7658664	Human Gut	0.962098	9.62143
SRR8180447	Human Gut	0	0
SRR8784356	Human Gut	0	0
SRR8784358	Human Gut	0	0
SRR8784364	Human Gut	0	0
SRR8784370	Human Gut	0	0
ERR1713334	Wastewater Influent	334.457	7.18452
ERR1713335	Wastewater Influent	48.0822	28.3679
ERR1713336	Wastewater Influent	105.266	79.3988
ERR1713337	Wastewater Influent	34.669	545.323
ERR1713338	Wastewater Influent	227.875	218.785
ERR1713341	Wastewater Influent	175.325	6.44881
ERR1713342	Wastewater Influent	378.452	46.4155
ERR1713344	Wastewater Influent	12.5764	175.26
ERR1713345	Wastewater Influent	23.6309	527.248
ERR1713347	Wastewater Influent	126.427	18.6905
ERR1713349	Wastewater Influent	71.5555	55.1202
ERR1713350	Wastewater Influent	154.63	32.2298
ERR1713351	Wastewater Influent	59.5043	18.6381
ERR1713353	Wastewater Influent	125.306	75.8869
ERR1713354	Wastewater Influent	72.7689	12.2012
ERR1713355	Wastewater Influent	150.581	290.562
ERR1713356	Wastewater Influent	139.431	21.8536
ERR1713357	Wastewater Influent	5.92999	17.206
ERR1713358	Wastewater Influent	3.05769	525.594
ERR1713359	Wastewater Influent	23.0858	13.9952
ERR1713362	Wastewater Influent	20.7936	252.524
ERR1713363	Wastewater Influent	164.323	27.5036
ERR1713364	Wastewater Influent	110.338	74.8393
ERR1713365	Wastewater Influent	9.9056	12.9143
ERR1713367	Wastewater Influent	50.9196	70.6048
ERR1713368	Wastewater Influent	99.8338	113.906
ERR1713369	Wastewater Influent	68.3837	329.251
ERR1713370	Wastewater Influent	34.5209	313.95
ERR1713371	Wastewater Influent	22.2959	53.1107
ERR1713372	Wastewater Influent	129.438	73.7774
ERR1713374	Wastewater Influent	27.5993	17.1179
ERR1713375	Wastewater Influent	281.404	29.344
ERR1713376	Wastewater Influent	107.218	93.3405
ERR1713378	Wastewater Influent	57.0747	477.017
ERR1713380	Wastewater Influent	35.2247	17.4595
ERR1713381	Wastewater Influent	156.961	102.854
ERR1713382	Wastewater Influent	24.7694	8.57381
ERR1713383	Wastewater Influent	231.538	25.1202
ERR1713384	Wastewater Influent	16.7828	250.92
ERR1713385	Wastewater Influent	53.4381	463.757
ERR1713386	Wastewater Influent	117.218	257.723
ERR1713387	Wastewater Influent	116.909	46.2274
ERR1713388	Wastewater Influent	217.79	24.3262
ERR1713389	Wastewater Influent	213.846	35.069
ERR1713390	Wastewater Influent	361.066	23.575
ERR1713391	Wastewater Influent	380.125	32.6119
ERR1713392	Wastewater Influent	85.6179	8.95
ERR1713394	Wastewater Influent	7.26927	453.446
ERR1713395	Wastewater Influent	7.13221	64.031
ERR1713396	Wastewater Influent	20.5748	1032.37
ERR1713397	Wastewater Influent	333.254	60.531
ERR1713398	Wastewater Influent	124.648	15.0631
ERR1713399	Wastewater Influent	39.529	9.66548
ERR1713400	Wastewater Influent	450.128	42.8893
ERR1713401	Wastewater Influent	280.814	23.5917
ERR1713402	Wastewater Influent	250.191	30.4667
ERR1713405	Wastewater Influent	314.367	94.375
ERR1713406	Wastewater Influent	77.0333	102.889
ERR1713407	Wastewater Influent	6.33075	324.274
ERR1713408	Wastewater Influent	95.1431	82.6214
ERR1713409	Wastewater Influent	323.464	48.7536
ERR1713410	Wastewater Influent	69.8653	223.165
ERR1713411	Wastewater Influent	33.8699	132.287
ERR1725942	Wastewater Influent	98.5126	33.7226
ERR1725947	Wastewater Influent	16.3164	10.4048
ERR1725950	Wastewater Influent	16.5645	459.114
ERR1725969	Wastewater Influent	25.7377	46.8417
ERR1725970	Wastewater Influent	28.572	50.2298
ERR1725974	Wastewater Influent	1.62575	7.90952
ERR1725979	Wastewater Influent	40.3947	12.5548
ERR1725985	Wastewater Influent	14.4088	116.113
ERR1725988	Wastewater Influent	10.3347	23.6821
ERR1725992	Wastewater Influent	45.8466	72.5786
ERR1725997	Wastewater Influent	3.65516	12.544
ERR1725998	Wastewater Influent	4.13269	10.0536
ERR1726005	Wastewater Influent	19.1439	3.93095
ERR1726013	Wastewater Influent	159.199	26.781
ERR1726016	Wastewater Influent	90.2994	14.7405
ERR1726033	Wastewater Influent	41.696	202.286
ERR2592244	Wastewater Influent	54.904	16.8714
ERR2592245	Wastewater Influent	84.653	20.7845
ERR2592246	Wastewater Influent	316.901	7.54881
ERR2592247	Wastewater Influent	43.1203	12.4762
ERR2592248	Wastewater Influent	88.3759	58.3643
ERR2592249	Wastewater Influent	237.059	174.586
ERR2592250	Wastewater Influent	953.06	32.625
ERR2592252	Wastewater Influent	20.8768	443.126
ERR2592253	Wastewater Influent	82.1481	8.26905
ERR2592255	Wastewater Influent	137.535	15.0464
ERR2592256	Wastewater Influent	4.84513	7.79881
ERR2592258	Wastewater Influent	12.6433	130.013
ERR2592259	Wastewater Influent	110.754	68.0345
ERR2592260	Wastewater Influent	10.5932	9.64405
ERR2592263	Wastewater Influent	314.178	26.1833
ERR2592264	Wastewater Influent	84.9301	59.5583
ERR2592265	Wastewater Influent	39.1969	306.61
ERR2592266	Wastewater Influent	13.6796	20.806
ERR2592267	Wastewater Influent	27.7214	7.54881
ERR2592268	Wastewater Influent	185.696	18.225
ERR2592269	Wastewater Influent	96.0751	36.9155
ERR2592273	Wastewater Influent	3.46369	26.5048
ERR2592274	Wastewater Influent	110.089	8.25476
ERR2592277	Wastewater Influent	226.375	11.3845
ERR2592278	Wastewater Influent	287.069	34.1155
ERR2592279	Wastewater Influent	697.928	16.419
ERR2592280	Wastewater Influent	367.601	20.7393
ERR2592282	Wastewater Influent	54.2687	146.126
ERR2592283	Wastewater Influent	112.393	375.58
ERR2592328	Wastewater Influent	38.0712	11.9548
ERR2592329	Wastewater Influent	551.981	75.1417
ERR2592332	Wastewater Influent	139.805	18.4452
ERR2592334	Wastewater Influent	61.6171	49.1512
ERR2592337	Wastewater Influent	71.6104	56.3226
ERR2592338	Wastewater Influent	17.7473	30.8619
ERR2592342	Wastewater Influent	230.575	28.3655
ERR2592343	Wastewater Influent	83.6491	206.651
ERR2863807	Migratory Bird Droppings	0.000309071	0
ERR2863809	Migratory Bird Droppings	0.00160717	0
ERR2863810	Migratory Bird Droppings	0.000927214	0
ERR2863811	Migratory Bird Droppings	0	0
ERR2863815	Migratory Bird Droppings	0	0
ERR2863816	Migratory Bird Droppings	0	0
ERR2863817	Migratory Bird Droppings	0.000329676	0
ERR2863818	Migratory Bird Droppings	0	0
ERR2863820	Migratory Bird Droppings	0	0
ERR2863821	Migratory Bird Droppings	0	0
ERR2863823	Migratory Bird Droppings	0.00064905	0
ERR2863826	Migratory Bird Droppings	0.0341627	0
ERR2863828	Migratory Bird Droppings	0.000319374	0
ERR4083996	Migratory Bird Droppings	0	0
SRR10492797	Migratory Bird Droppings	0	1.26429
SRR10492798	Migratory Bird Droppings	0.000659352	258.598
SRR10492799	Migratory Bird Droppings	0	0.359524
SRR10492800	Migratory Bird Droppings	0	0
SRR10800386	Migratory Bird Droppings	0.0247257	24.5345
SRR10800387	Migratory Bird Droppings	0	2.14286
SRR10800388	Migratory Bird Droppings	0	34.9
SRR10800397	Migratory Bird Droppings	0	8.55833
SRR10800399	Migratory Bird Droppings	0.0154536	2.125
SRR21527943	Migratory Bird Droppings	0	0
SRR21527944	Migratory Bird Droppings	0	0
SRR21527946	Migratory Bird Droppings	0	0
SRR21527947	Migratory Bird Droppings	0	0
SRR21527956	Migratory Bird Droppings	0	0
SRR21527967	Migratory Bird Droppings	0	0
SRR3327411	Migratory Bird Droppings	0.0025962	0.9
SRR3327572	Migratory Bird Droppings	0.0025962	0
SRR3327573	Migratory Bird Droppings	0	0
SRR9850902	Migratory Bird Droppings	0	0
SRR9850903	Migratory Bird Droppings	0	0
SRR9850904	Migratory Bird Droppings	0	0
SRR9850905	Migratory Bird Droppings	0	0
SRR9850906	Migratory Bird Droppings	0	0
SRR9850907	Migratory Bird Droppings	0	0
SRR9850908	Migratory Bird Droppings	0.00295678	0
SRR9850909	Migratory Bird Droppings	0	0
SRR9850910	Migratory Bird Droppings	0	0
SRR9850911	Migratory Bird Droppings	0	0
SRR9850912	Migratory Bird Droppings	0	0
SRR9850913	Migratory Bird Droppings	0	0
SRR9850914	Migratory Bird Droppings	0.00316283	0
SRR9850915	Migratory Bird Droppings	0	0
SRR9850916	Migratory Bird Droppings	0.000309071	0.216667
SRR9850917	Migratory Bird Droppings	0.00127749	0
SRR9850918	Migratory Bird Droppings	0	0
SRR9850919	Migratory Bird Droppings	0	0.296429
SRR9850920	Migratory Bird Droppings	0	0
SRR9850921	Migratory Bird Droppings	0	0
SRR9850922	Migratory Bird Droppings	0	0
SRR9850923	Migratory Bird Droppings	0	0.695238
SRR9850924	Migratory Bird Droppings	0	0
SRR9850925	Migratory Bird Droppings	0	0
SRR9850926	Migratory Bird Droppings	0.0194303	0
SRR9850927	Migratory Bird Droppings	0	0.588095
SRR9850928	Migratory Bird Droppings	0	0
SRR9850929	Migratory Bird Droppings	0	0
SRR9850930	Migratory Bird Droppings	0	0.34881
SRR9850931	Migratory Bird Droppings	0	1.35952
SRR9850932	Migratory Bird Droppings	0	0
SRR9850933	Migratory Bird Droppings	0	0
SRR9850934	Migratory Bird Droppings	0	0
SRR9850935	Migratory Bird Droppings	0	0
SRR9850936	Migratory Bird Droppings	0	0
SRR9850937	Migratory Bird Droppings	0	0
SRR9850938	Migratory Bird Droppings	0	0
SRR9850939	Migratory Bird Droppings	0	78.7095
SRR9850940	Migratory Bird Droppings	0	0
SRR9850941	Migratory Bird Droppings	0	0
SRR9850942	Migratory Bird Droppings	0.0025859	0
SRR9850943	Migratory Bird Droppings	0	0
SRR9850944	Migratory Bird Droppings	0.0185443	0
SRR9850945	Migratory Bird Droppings	0	37.0143
SRR9850946	Migratory Bird Droppings	0	45.7548
SRR9850947	Migratory Bird Droppings	0.0206975	34.1702
SRR9850948	Migratory Bird Droppings	0.00101994	5.11429
SRR9850949	Migratory Bird Droppings	0.00405914	0.235714
SRR9850960	Migratory Bird Droppings	0.00525421	0
SRR9850963	Migratory Bird Droppings	0.00267862	0
SRR9850964	Migratory Bird Droppings	0	0
SRR9850965	Migratory Bird Droppings	0	0
SRR9850966	Migratory Bird Droppings	0	0
SRR9850967	Migratory Bird Droppings	0	0
SRR9850968	Migratory Bird Droppings	0	0.35
SRR9850969	Migratory Bird Droppings	0	0
SRR9850970	Migratory Bird Droppings	0	0.888095
SRR9850971	Migratory Bird Droppings	0	0
SRR9850972	Migratory Bird Droppings	0	0
SRR9850973	Migratory Bird Droppings	0	0
SRR9850974	Migratory Bird Droppings	0	0
SRR9850975	Migratory Bird Droppings	0	0
SRR9850976	Migratory Bird Droppings	0	0.307143
SRR9850977	Migratory Bird Droppings	0	0
SRR9850978	Migratory Bird Droppings	0	0
SRR9850979	Migratory Bird Droppings	0	0
SRR9850980	Migratory Bird Droppings	0	1.46071
SRR9850981	Migratory Bird Droppings	0	368.965
SRR9850982	Migratory Bird Droppings	0	25.0107
SRR9850983	Migratory Bird Droppings	0	20.6738
SRR9850984	Migratory Bird Droppings	0	9.79048
SRR9850985	Migratory Bird Droppings	0	0
SRR9850986	Migratory Bird Droppings	0.409931	0
SRR9850987	Migratory Bird Droppings	0	0
SRR9850988	Migratory Bird Droppings	0.00224592	0
SRR9850989	Migratory Bird Droppings	0	0.203571
SRR9850990	Migratory Bird Droppings	0	0
SRR9850991	Migratory Bird Droppings	0	0
SRR9850992	Migratory Bird Droppings	0	0
SRR9850993	Migratory Bird Droppings	0	0
SRR9850996	Migratory Bird Droppings	0	7.7881
SRR9850997	Migratory Bird Droppings	0	138.663
SRR9850998	Migratory Bird Droppings	0	117.882
SRR9851003	Migratory Bird Droppings	0.0268995	0
SRR9851004	Migratory Bird Droppings	0	0
ERR1135285	Pig Feces	0	0
ERR1135286	Pig Feces	0	0
ERR1135288	Pig Feces	0	0
ERR1135290	Pig Feces	0	0
ERR1135291	Pig Feces	0	0
ERR1135308	Pig Feces	0	0
ERR1135309	Pig Feces	0	0.22619
ERR1135310	Pig Feces	0	0.228571
ERR1135311	Pig Feces	0	0
ERR1135315	Pig Feces	0	0
ERR1135318	Pig Feces	0	0
ERR1135327	Pig Feces	0	0.221429
ERR1135334	Pig Feces	0	0.652381
ERR1135337	Pig Feces	0	0.228571
ERR1135340	Pig Feces	0	0.228571
ERR1135345	Pig Feces	0	0.120238
ERR1135353	Pig Feces	0	0.228571
ERR1135364	Pig Feces	0	0
ERR2241627	Pig Feces	0.000350281	0.359524
ERR2241629	Pig Feces	0.00039149	0
ERR2241630	Pig Feces	0.000638747	0
ERR2241633	Pig Feces	0	0
ERR2241636	Pig Feces	0.000309071	0.719048
ERR2241638	Pig Feces	0	0
ERR2241640	Pig Feces	0.000309071	0.359524
ERR2241642	Pig Feces	0.000927214	0.345238
ERR2241644	Pig Feces	0.000309071	0
ERR2241646	Pig Feces	0	0
ERR2241648	Pig Feces	0.000659352	0
ERR2241650	Pig Feces	0.0690362	0
ERR2241652	Pig Feces	0.146417	0
ERR2241654	Pig Feces	0.115067	0
ERR2241656	Pig Feces	0.221903	0.359524
ERR2241658	Pig Feces	0.133735	0
ERR2241660	Pig Feces	0.134662	0
ERR2241663	Pig Feces	0.152898	0
ERR2241666	Pig Feces	0	1.75833
ERR2241667	Pig Feces	0	0
ERR2241669	Pig Feces	0	1.43214
ERR2241672	Pig Feces	0	0
ERR2241673	Pig Feces	0.000309071	0
ERR2241675	Pig Feces	0	0
ERR2241676	Pig Feces	0	3.21071
ERR2241677	Pig Feces	0	0
ERR2241680	Pig Feces	0	0
ERR2241683	Pig Feces	0	1.07857
ERR2241684	Pig Feces	0	0.359524
ERR2241705	Pig Feces	0	1.07857
ERR2241707	Pig Feces	0.000309071	0
ERR2241708	Pig Feces	0.00100963	1.07857
ERR2241710	Pig Feces	0	0.352381
ERR2241711	Pig Feces	0	0
ERR2241712	Pig Feces	0	0.359524
ERR2241716	Pig Feces	0	0
ERR2241717	Pig Feces	0	0
ERR2241719	Pig Feces	0	1.07262
ERR2241720	Pig Feces	0	0.359524
ERR2241721	Pig Feces	0	0.359524
ERR2241722	Pig Feces	0	0.719048
ERR2241723	Pig Feces	0	0
ERR2241724	Pig Feces	0	0
ERR2241745	Pig Feces	0.000947818	8.22143
ERR2241746	Pig Feces	0.000329676	1.07857
ERR2241751	Pig Feces	0	0.359524
ERR2241757	Pig Feces	0.000309071	0.359524
ERR2241767	Pig Feces	0	2.51667
ERR2241768	Pig Feces	0	1.4381
ERR2241769	Pig Feces	0	1.4381
ERR2245465	Pig Feces	0.00199866	0
ERR2245466	Pig Feces	0.0021841	0
ERR2245467	Pig Feces	0.000927214	0.719048
ERR2245475	Pig Feces	0.00185443	1.4381
ERR2245476	Pig Feces	0.00223562	0
ERR2245477	Pig Feces	0.00313192	0.721429
ERR2245481	Pig Feces	0.00395611	0
ERR2245482	Pig Feces	0.000370885	0.719048
ERR2245483	Pig Feces	0.000309071	0
SRR12268554	Pig Feces	0	4.64286
SRR12268555	Pig Feces	0	14.6345
SRR12268556	Pig Feces	0	4.95476
SRR12268557	Pig Feces	0	2.5
SRR12268558	Pig Feces	0	2.14286
SRR12268559	Pig Feces	0	1.42024
SRR12268560	Pig Feces	0	51.6143
SRR12268561	Pig Feces	0	0.357143
SRR12268562	Pig Feces	0	2.8369
SRR12268563	Pig Feces	0	1.42857
SRR12268564	Pig Feces	0	1.42857
SRR17241479	Pig Feces	0.000721166	0
SRR17241485	Pig Feces	0.000679957	0
SRR17241486	Pig Feces	0.000618142	0
SRR17241493	Pig Feces	0.000679957	0
SRR17241494	Pig Feces	0.000309071	0
SRR17241495	Pig Feces	0	0
SRR17241496	Pig Feces	0	0
SRR17241497	Pig Feces	0	0
SRR17241498	Pig Feces	0	0
SRR17241499	Pig Feces	0.000638747	0
SRR17241502	Pig Feces	0.000309071	0
SRR17241504	Pig Feces	0.000309071	0.402381
SRR17241507	Pig Feces	0	0
SRR17241509	Pig Feces	0	0
ERR2431954	Sediment	0	0
ERR2431955	Sediment	0	0
ERR4833474	Sediment	0.0126307	1.84286
ERR4833475	Sediment	0.0091279	1.1119
ERR4833476	Sediment	0.0131458	4.45476
ERR4833477	Sediment	0.00964302	1.85119
ERR4833478	Sediment	0.0163705	1.84881
ERR4833479	Sediment	0.016628	2.5881
ERR4833480	Sediment	0.00673775	2.09048
ERR4833481	Sediment	0.00642868	3.65952
ERR4833482	Sediment	0	1.85238
ERR5037037	Sediment	0	0
ERR5037038	Sediment	0	0
ERR5037039	Sediment	0	0
ERR5037040	Sediment	0	0
ERR5037041	Sediment	0	0
ERR5037042	Sediment	0	0
SRR12059192	Sediment	0	0
SRR15677224	Sediment	0	0
SRR15677225	Sediment	0	0
SRR15677227	Sediment	0	0
SRR15677229	Sediment	0	0
SRR15677230	Sediment	0	0
SRR15677231	Sediment	0	0
SRR15677232	Sediment	0	0
SRR15677234	Sediment	0	0
SRR15677238	Sediment	0	0
SRR15677241	Sediment	0	0
SRR17401453	Sediment	0	0
SRR17401454	Sediment	0	0
SRR17401455	Sediment	0	0
SRR17401461	Sediment	0	0
SRR17401462	Sediment	0	0
SRR17401463	Sediment	0	0
SRR17401464	Sediment	0	0
SRR17848286	Sediment	0	26.4726
SRR17848287	Sediment	0	19.3369
SRR17848288	Sediment	0	0
SRR17848289	Sediment	0.000329676	0.359524
SRR17848290	Sediment	0	0
SRR17848291	Sediment	0	0
SRR17848292	Sediment	0	13.7607
SRR17848293	Sediment	0.00311132	0
SRR17848294	Sediment	0	1.39643
SRR17848295	Sediment	0.00933395	24.0381
SRR17848296	Sediment	0	14.2583
SRR17848297	Sediment	0	0
SRR17848298	Sediment	0	0
SRR17848299	Sediment	0	0
SRR17848300	Sediment	0.00158657	1.79762
SRR17848301	Sediment	0.00622263	0
SRR17848302	Sediment	0	0
SRR2637322	Sediment	0	0
SRR2637706	Sediment	0	0
SRR2638077	Sediment	0	0
SRR2656924	Sediment	0	0
SRR2656926	Sediment	0	0
SRR2656927	Sediment	0	0
SRR2657076	Sediment	0	0
SRR2657155	Sediment	0	0
SRR2657207	Sediment	0	0
SRR2657222	Sediment	0	0
SRR2657233	Sediment	0	0
SRR2657579	Sediment	0	0
SRR2657590	Sediment	0	0
SRR2657627	Sediment	0	0
SRR2658004	Sediment	0	0
SRR3081468	Sediment	0	0
SRR3081485	Sediment	0	0
SRR3081534	Sediment	0	0
SRR3081569	Sediment	0	0
SRR3085416	Sediment	0	0
SRR3085435	Sediment	0	0
SRR3085585	Sediment	0	0
SRR3089646	Sediment	0	0
SRR3089688	Sediment	0	0
SRR3089827	Sediment	0	0
SRR3091719	Sediment	0	0
SRR3091743	Sediment	0	0
SRR3095933	Sediment	0	0
SRR3095939	Sediment	0	0
SRR3943820	Sediment	0	0
SRR3943821	Sediment	0	0
SRR3943822	Sediment	0	0
SRR3943823	Sediment	0	0
SRR7066493	Sediment	0	0
SRR7066494	Sediment	0	0
ERR1676588	Soil	0.000329676	0
ERR1676591	Soil	0	0
ERR1676592	Soil	0	0
ERR1676593	Soil	0	0
ERR1762243	Soil	0	0
ERR1762244	Soil	0	0
ERR1762249	Soil	0	0
ERR1762250	Soil	0	0
ERR1762255	Soil	0	0
ERR1762256	Soil	0	0
ERR1762265	Soil	0	0
ERR1762266	Soil	0	0
ERR1762271	Soil	0	0
ERR1762272	Soil	0	0
ERR1762283	Soil	0.000309071	0
ERR1762284	Soil	0	0
ERR1762289	Soil	0	0
ERR1762290	Soil	0	0
ERR1762291	Soil	0	0
ERR1762292	Soil	0	0
ERR1762297	Soil	0	0
ERR1762298	Soil	0	0
ERR1762299	Soil	0	0
ERR1762300	Soil	0	0
ERR1762301	Soil	0	0
ERR1762302	Soil	0	0
ERR1762321	Soil	0	0
ERR1762322	Soil	0	0
ERR1762331	Soil	0	0
ERR1762332	Soil	0	0
ERR1762337	Soil	0	0
ERR1762338	Soil	0	0
ERR1762347	Soil	0	0
ERR1762348	Soil	0	0
ERR1762349	Soil	0	0
ERR1762350	Soil	0	0
ERR1762353	Soil	0	0
ERR1762354	Soil	0	0
ERR1877884	Soil	0	0
ERR1877887	Soil	0	0
ERR2486618	Soil	0	0
ERR2486620	Soil	0	0
ERR2486621	Soil	0	0
ERR2486627	Soil	0.000309071	0
ERR2486629	Soil	0	0
ERR2486632	Soil	0	0
ERR2486633	Soil	0	0
ERR2486634	Soil	0	0
ERR2486635	Soil	0.000350281	0
ERR3929365	Soil	0	0
ERR3929366	Soil	0	0
ERR3929367	Soil	0	1.79286
ERR3929368	Soil	0	0.597619
ERR3929369	Soil	0	0
ERR3929370	Soil	0	0
ERR3929371	Soil	0	0
ERR3929372	Soil	0	0
ERR3929373	Soil	0	0
ERR3943989	Soil	0	0
ERR3943991	Soil	0	1.78929
ERR3943992	Soil	0	0.597619
ERR3943993	Soil	0	0
ERR3943994	Soil	0	0
ERR3943995	Soil	0	0
ERR3943996	Soil	0	0
ERR3943997	Soil	0	0
ERR4392702	Soil	0	0
ERR4392704	Soil	0	0
ERR4392705	Soil	0	0
ERR4392707	Soil	0	0
ERR4392710	Soil	0	0
ERR4392711	Soil	0	0
ERR4392712	Soil	0	0
ERR4392713	Soil	0	0
ERR4392714	Soil	0	0
ERR4392715	Soil	0	0
ERR4392716	Soil	0	0
ERR4392717	Soil	0	0
ERR4392718	Soil	0	0
ERR4392719	Soil	0	0
ERR4392720	Soil	0	0
ERR4392721	Soil	0	0
ERR4392723	Soil	0	0
ERR4392724	Soil	0	0
ERR4392725	Soil	0	0
ERR4392726	Soil	0	0
ERR4392727	Soil	0	0
ERR4392728	Soil	0	0
ERR4837091	Soil	0	0
ERR4837094	Soil	0	0
ERR4837098	Soil	0	0
ERR4837129	Soil	0	0
ERR4837135	Soil	0	0
ERR4837136	Soil	0	0
ERR4837137	Soil	0	0
ERR4837145	Soil	0	0
ERR5762504	Soil	0	0
ERR5762868	Soil	0	0
ERR5763222	Soil	0	0
ERR5766257	Soil	0	0
ERR5766521	Soil	0	0
ERR5766908	Soil	0	0
ERR9527597	Soil	0	0
ERR9527609	Soil	0	0
ERR9527610	Soil	0	0
ERR9527613	Soil	0	0
ERR9527615	Soil	0	0
ERR1193289	Surface Water	0.00206047	32.9357
ERR1193293	Surface Water	1.21962	27.3952
ERR1193294	Surface Water	0.091516	14.2881
ERR1193298	Surface Water	0.20682	19.6048
ERR1414266	Surface Water	0.235945	38.0071
ERR1713331	Surface Water	92.7656	42.6607
ERR1713346	Surface Water	355.61	33.6095
ERR3503278	Surface Water	0.0576315	375.318
ERR3503279	Surface Water	0.124988	516.302
ERR3503280	Surface Water	0.00127749	1425.7
ERR3503282	Surface Water	0.0290527	324.307
ERR3503283	Surface Water	0.0143512	296.363
ERR3503289	Surface Water	0.168485	211.27
ERR3503291	Surface Water	0.0208623	416.587
ERR3503292	Surface Water	0.0692835	409.958
ERR3503293	Surface Water	0.534662	744.232
ERR3503296	Surface Water	0.0140524	274.119
ERR3503300	Surface Water	0.0291351	355.099
ERR3503301	Surface Water	0.0105599	216.19
ERR3503303	Surface Water	0.0957503	301.715
ERR3503306	Surface Water	0.510462	383.504
ERR3503308	Surface Water	0.19967	534.651
ERR3503310	Surface Water	0.0306496	226.22
ERR3503311	Surface Water	0.0521197	641.752
ERR3503313	Surface Water	0.402102	212.155
ERR3503314	Surface Water	0.289352	351.013
ERR3503316	Surface Water	0.115788	229.611
SRR10036019	Surface Water	1.59122	8.89286
SRR10036021	Surface Water	5.2949	23.9988
SRR10036022	Surface Water	2.76515	17.5536
SRR10036024	Surface Water	0.994117	17.7345
SRR10036025	Surface Water	0.0334827	2.97619
SRR10036026	Surface Water	1.19815	13.8988
SRR10036028	Surface Water	6.60672	16.9226
SRR10036029	Surface Water	4.0543	6.52143
SRR10036031	Surface Water	1.00498	6.25
SRR10036033	Surface Water	0.898254	5.33452
SRR10036035	Surface Water	12.9746	3.57143
SRR10036038	Surface Water	24.1859	19.2119
SRR10036039	Surface Water	8.92108	17.519
SRR10036040	Surface Water	0.0206047	5.63929
SRR10036041	Surface Water	8.59355	1.19048
SRR10036042	Surface Water	1.39626	2.07024
SRR10036043	Surface Water	0.00772678	26.4476
SRR10036044	Surface Water	0.809973	26.7571
SRR10036045	Surface Water	0.0392108	22.2952
SRR10036046	Surface Water	4.90891	4.7619
SRR10036047	Surface Water	0.489548	10.0774
SRR10036048	Surface Water	0.442147	9.70357
SRR10036049	Surface Water	0.280369	16.3071
SRR10036050	Surface Water	0.00257559	0
SRR10036051	Surface Water	0.554319	0
SRR10036052	Surface Water	0.167259	0.595238
SRR10036053	Surface Water	0.0205944	1.4881
SRR10036054	Surface Water	16.1753	2.37143
SRR10036055	Surface Water	0.0103024	2.375
SRR10036056	Surface Water	0.378458	7.42024
SRR10036057	Surface Water	0.273477	13.0857
SRR10036058	Surface Water	4.76584	3.86071
SRR10036059	Surface Water	0.873796	5.35119
SRR10036060	Surface Water	0.0180704	1.78452
SRR10036061	Surface Water	4.59632	0.892857
SRR10036063	Surface Water	0.423397	5.95238
SRR10036066	Surface Water	0.0547777	0.595238
SRR10036067	Surface Water	1.97773	0.892857
SRR10036069	Surface Water	0.00515119	0.892857
SRR10036070	Surface Water	3.92858	0
SRR10036072	Surface Water	1.28583	0.595238
SRR10036074	Surface Water	0	0
SRR10036075	Surface Water	0	0.297619
SRR10036076	Surface Water	0.012878	0.297619
SRR10036077	Surface Water	3.10374	1.175
SRR10036079	Surface Water	0.527162	15.6131
SRR10036080	Surface Water	1.74664	46.4917
SRR10036084	Surface Water	0.199402	2.67857
SRR10036085	Surface Water	0.0918972	1.4881
SRR10036086	Surface Water	0.012878	2.66071
SRR10036087	Surface Water	0.427816	1.19048
SRR10036088	Surface Water	3.63676	1.77143
SRR10036089	Surface Water	0.0179467	2.95238
SRR10492802	Surface Water	0	0
SRR10492803	Surface Water	0.000618142	0
SRR11567520	Surface Water	0.867408	108.712
SRR11567522	Surface Water	0.0280637	2.50595
SRR11567523	Surface Water	0.0203369	1.4381
SRR11567524	Surface Water	0.0476176	1.14167
SRR11567525	Surface Water	2.94753	23.1667
SRR11567529	Surface Water	18.8623	146.82
SRR11567531	Surface Water	0.11243	13.6095
SRR11567532	Surface Water	0.0176171	3.20595
SRR11567533	Surface Water	0.021975	1.43452
SRR11567534	Surface Water	0.0135476	0.359524
SRR11567535	Surface Water	0.0339772	0.359524
SRR11567536	Surface Water	0.0313295	0.719048
SRR11567538	Surface Water	5.88221	34.681
SRR11567540	Surface Water	0.797795	69.4321
SRR11567541	Surface Water	0.0413537	0.717857
SRR11567542	Surface Water	0.278854	6.09167
SRR12685660	Surface Water	0	0
SRR12685661	Surface Water	0	0
SRR12685662	Surface Water	0	0
SRR12685663	Surface Water	0	0
SRR12685664	Surface Water	0	0
SRR12685665	Surface Water	0	0
SRR12685668	Surface Water	0	0
SRR12685669	Surface Water	0	0.495238
SRR12685670	Surface Water	0	0
SRR12685673	Surface Water	0	0
SRR5306404	Surface Water	0.151909	10.075
SRR5306407	Surface Water	0.160171	10.0667
SRR5306409	Surface Water	0.19763	10.7881
SRR5306410	Surface Water	0.187277	9.12976
SRR6262235	Surface Water	0	1.07143
SRR6262236	Surface Water	0	2.13452
SRR6262237	Surface Water	0	1.07143
SRR6262238	Surface Water	0	10.2702
SRR6262239	Surface Water	0	0.357143
SRR6262240	Surface Water	0	0.707143
SRR6262241	Surface Water	0	1.07143
SRR6262242	Surface Water	0	1.07143
SRR6262243	Surface Water	0	1.07143
SRR6262244	Surface Water	0	1.07143
SRR6262245	Surface Water	0	0.357143
SRR6262246	Surface Water	0	1.07143
SRR8164872	Surface Water	0.00525421	0
SRR8164873	Surface Water	0.0133107	0.240476
SRR8571164	Surface Water	0.0158657	0
SRR8571165	Surface Water	0.0257765	0
SRR8571166	Surface Water	0	0.359524
SRR8571168	Surface Water	0	0.719048
SRR8571170	Surface Water	0.00311132	0
SRR8571171	Surface Water	0	0
SRR8942242	Surface Water	0.118199	17.9357
SRR8942247	Surface Water	0.0839025	0.359524
SRR8942248	Surface Water	0.223953	6.79881
SRR8942249	Surface Water	0.146191	1.43095
SRR8942250	Surface Water	0	0
SRR8942251	Surface Water	0.087086	1.79762
SRR8942254	Surface Water	0	0
SRR8942256	Surface Water	0.413671	2.51667
SRR8942257	Surface Water	0.00311132	5.00595
SRR8942258	Surface Water	0.00622263	4.29643
SRR8942265	Surface Water	0.829877	40.1107
SRR8942266	Surface Water	0.0653274	3.95476
SRR8942298	Surface Water	0.314377	18.2536
SRR8942301	Surface Water	0.938958	58.15
SRR8942303	Surface Water	0.531675	30.8071
SRR8942304	Surface Water	0.22998	13.5917
SRR8942308	Surface Water	0.0193479	10.7857
SRR8942310	Surface Water	0.0280019	1.40595
SRR8942311	Surface Water	0.0124453	5.35714
SRR8942315	Surface Water	0.00931335	1.79762
SRR8942316	Surface Water	0	0
SRR9030900	Surface Water	0.0385309	47.0869
SRR9030901	Surface Water	0.0247154	54.8667
SRR9030902	Surface Water	0.00405914	11.3929
SRR9030903	Surface Water	0	5.23333
SRR9030904	Surface Water	0	11.869
SRR9030905	Surface Water	0	10.4286
SRR9030906	Surface Water	0	23.4845
SRR9030907	Surface Water	0.00206047	14.9869
SRR9030908	Surface Water	0.00614022	36.1464
SRR9030909	Surface Water	0.00412095	8.55357
SRR9030910	Surface Water	0	4.03452
SRR9030911	Surface Water	0.00412095	14.0083
SRR9030912	Surface Water	0.00206047	14.0345

## Sheet: Table S7_old
Table S7: Network-derived ARG-MGE combinations related to ERR
ARG	MGE	ARG Phenotype	Number of Environments Detected	Environments detected in
vanS	Insertion Sequence (IS)	glycopeptide	11	Activated Sludge, Chicken Feces, Cow Manure, Wastewater Effluent, Hospital Sewage, Human Gut, Wastewater Influent, Migratory Bird Droppings, Pig Feces, Surface Water, Sediment
vanS	Plasmid	glycopeptide	11	Activated Sludge, Chicken Feces, Cow Manure, Wastewater Effluent, Hospital Sewage, Human Gut, Wastewater Influent, Migratory Bird Droppings, Pig Feces, Surface Water, Sediment
bacA	Plasmid	bacitracin	11	Activated Sludge, Chicken Feces, Cow Manure, Wastewater Effluent, Hospital Sewage, Human Gut, Wastewater Influent, Migratory Bird Droppings, Pig Feces, Surface Water, Sediment
bacA	Phage	bacitracin	10	Activated Sludge, Chicken Feces, Cow Manure, Wastewater Effluent, Hospital Sewage, Human Gut, Wastewater Influent, Migratory Bird Droppings, Pig Feces, Surface Water
dfrA3	Phage	diaminopyrimidine	10	Activated Sludge, Chicken Feces, Cow Manure, Wastewater Effluent, Hospital Sewage, Wastewater Influent, Migratory Bird Droppings, Surface Water, Sediment, Soil
ompR	Plasmid,Conjugative Element (CE)	multidrug	9	Activated Sludge, Chicken Feces, Wastewater Effluent, Hospital Sewage, Human Gut, Wastewater Influent, Migratory Bird Droppings, Pig Feces, Surface Water
sul1	Plasmid	sulfonamide	9	Activated Sludge, Chicken Feces, Wastewater Effluent, Hospital Sewage, Wastewater Influent, Migratory Bird Droppings, Pig Feces, Surface Water, Soil
vgaC	Plasmid	MLS	9	Activated Sludge, Chicken Feces, Wastewater Effluent, Hospital Sewage, Human Gut, Wastewater Influent, Migratory Bird Droppings, Pig Feces, Surface Water
tetO	Phage	tetracycline	9	Chicken Feces, Cow Manure, Wastewater Effluent, Hospital Sewage, Human Gut, Wastewater Influent, Migratory Bird Droppings, Pig Feces, Surface Water
truncated_putative_response_regulator_ArlR	Plasmid,Conjugative Element (CE)	unclassified	9	Chicken Feces, Cow Manure, Wastewater Effluent, Hospital Sewage, Human Gut, Wastewater Influent, Migratory Bird Droppings, Pig Feces, Surface Water
vanS	Phage	glycopeptide	9	Chicken Feces, Cow Manure, Wastewater Effluent, Hospital Sewage, Human Gut, Wastewater Influent, Migratory Bird Droppings, Pig Feces, Surface Water
transcriptional_regulatory_protein_CpxR_cpxR	Plasmid,Conjugative Element (CE)	unclassified	9	Chicken Feces, Cow Manure, Wastewater Effluent, Hospital Sewage, Human Gut, Wastewater Influent, Migratory Bird Droppings, Pig Feces, Surface Water
bacA	Plasmid,Conjugative Element (CE)	bacitracin	9	Activated Sludge, Chicken Feces, Cow Manure, Wastewater Effluent, Hospital Sewage, Human Gut, Wastewater Influent, Migratory Bird Droppings, Pig Feces
tetM	Phage	tetracycline	9	Chicken Feces, Cow Manure, Wastewater Effluent, Hospital Sewage, Human Gut, Wastewater Influent, Migratory Bird Droppings, Pig Feces, Surface Water
lnuC	Insertion Sequence (IS)	MLS	9	Chicken Feces, Cow Manure, Wastewater Effluent, Hospital Sewage, Human Gut, Wastewater Influent, Migratory Bird Droppings, Pig Feces, Surface Water
ugd	Plasmid	peptide	9	Chicken Feces, Cow Manure, Wastewater Effluent, Hospital Sewage, Human Gut, Wastewater Influent, Migratory Bird Droppings, Pig Feces, Surface Water
ugd	Phage	peptide	9	Chicken Feces, Cow Manure, Wastewater Effluent, Hospital Sewage, Human Gut, Wastewater Influent, Migratory Bird Droppings, Pig Feces, Surface Water
aph(3'')-I	Plasmid	aminoglycoside	9	Activated Sludge, Chicken Feces, Cow Manure, Wastewater Effluent, Hospital Sewage, Human Gut, Wastewater Influent, Migratory Bird Droppings, Surface Water
TEM-1	Plasmid	beta-lactam	8	Chicken Feces, Wastewater Effluent, Hospital Sewage, Human Gut, Wastewater Influent, Migratory Bird Droppings, Pig Feces, Surface Water
CfxA2	Phage,Conjugative Element (CE)	beta-lactam	8	Chicken Feces, Cow Manure, Wastewater Effluent, Hospital Sewage, Human Gut, Wastewater Influent, Pig Feces, Surface Water
acrB	Phage	multidrug	8	Activated Sludge, Chicken Feces, Wastewater Effluent, Hospital Sewage, Human Gut, Wastewater Influent, Migratory Bird Droppings, Surface Water
macB	Phage	MLS	8	Chicken Feces, Wastewater Effluent, Hospital Sewage, Human Gut, Wastewater Influent, Migratory Bird Droppings, Pig Feces, Surface Water
CfxA3	Phage,Conjugative Element (CE)	beta-lactam	8	Chicken Feces, Cow Manure, Wastewater Effluent, Hospital Sewage, Human Gut, Wastewater Influent, Pig Feces, Surface Water
tetW	Integrative Element (IGE)	tetracycline	8	Chicken Feces, Cow Manure, Hospital Sewage, Human Gut, Wastewater Influent, Migratory Bird Droppings, Pig Feces, Surface Water
CfxA6	Phage,Conjugative Element (CE)	beta-lactam	8	Chicken Feces, Cow Manure, Wastewater Effluent, Hospital Sewage, Human Gut, Wastewater Influent, Pig Feces, Surface Water
acrB	Plasmid	multidrug	8	Activated Sludge, Chicken Feces, Wastewater Effluent, Hospital Sewage, Human Gut, Wastewater Influent, Migratory Bird Droppings, Surface Water
mdtB	Plasmid	multidrug	8	Chicken Feces, Wastewater Effluent, Hospital Sewage, Human Gut, Wastewater Influent, Migratory Bird Droppings, Surface Water, Sediment
aph(3'')-I	Phage	aminoglycoside	8	Activated Sludge, Chicken Feces, Cow Manure, Wastewater Effluent, Hospital Sewage, Wastewater Influent, Migratory Bird Droppings, Surface Water
sdiA	Phage,Conjugative Element (CE)	unclassified	8	Chicken Feces, Wastewater Effluent, Hospital Sewage, Human Gut, Wastewater Influent, Migratory Bird Droppings, Pig Feces, Surface Water
tetA	Plasmid	tetracycline	8	Activated Sludge, Chicken Feces, Wastewater Effluent, Hospital Sewage, Human Gut, Wastewater Influent, Migratory Bird Droppings, Surface Water
tetA	Phage	tetracycline	8	Chicken Feces, Wastewater Effluent, Hospital Sewage, Human Gut, Wastewater Influent, Migratory Bird Droppings, Pig Feces, Surface Water
tetW	Integrative Element (IGE),Conjugative Element (CE)	tetracycline	8	Chicken Feces, Cow Manure, Hospital Sewage, Human Gut, Wastewater Influent, Migratory Bird Droppings, Pig Feces, Surface Water
aph(6)-I	Plasmid	aminoglycoside	8	Activated Sludge, Chicken Feces, Wastewater Effluent, Hospital Sewage, Human Gut, Wastewater Influent, Migratory Bird Droppings, Surface Water
tet(W/N/W)	Integrative Element (IGE),Conjugative Element (CE)	tetracycline	8	Chicken Feces, Cow Manure, Hospital Sewage, Human Gut, Wastewater Influent, Migratory Bird Droppings, Pig Feces, Surface Water
tetM	Integrative Element (IGE)	tetracycline	8	Chicken Feces, Cow Manure, Hospital Sewage, Human Gut, Wastewater Influent, Migratory Bird Droppings, Pig Feces, Surface Water
lsa	Phage	MLS	8	Chicken Feces, Cow Manure, Hospital Sewage, Human Gut, Wastewater Influent, Migratory Bird Droppings, Pig Feces, Surface Water
cpxA	Plasmid,Conjugative Element (CE)	aminoglycoside:aminocoumarin	8	Chicken Feces, Wastewater Effluent, Hospital Sewage, Human Gut, Wastewater Influent, Migratory Bird Droppings, Pig Feces, Surface Water
tetM	Integrative Element (IGE),Conjugative Element (CE)	tetracycline	8	Chicken Feces, Cow Manure, Hospital Sewage, Human Gut, Wastewater Influent, Migratory Bird Droppings, Pig Feces, Surface Water
acrA	Plasmid	multidrug	7	Chicken Feces, Wastewater Effluent, Hospital Sewage, Human Gut, Wastewater Influent, Migratory Bird Droppings, Surface Water
bicyclomycin-multidrug_efflux_protein_bcr	Plasmid	multidrug	7	Chicken Feces, Wastewater Effluent, Hospital Sewage, Human Gut, Wastewater Influent, Migratory Bird Droppings, Surface Water
Escherichia_coli_LamB	Plasmid	multidrug	7	Chicken Feces, Wastewater Effluent, Hospital Sewage, Human Gut, Wastewater Influent, Migratory Bird Droppings, Surface Water
class_A	Plasmid	beta-lactam	7	Activated Sludge, Chicken Feces, Wastewater Effluent, Hospital Sewage, Human Gut, Wastewater Influent, Surface Water
aph(6)-I	Phage	aminoglycoside	7	Activated Sludge, Chicken Feces, Wastewater Effluent, Hospital Sewage, Wastewater Influent, Migratory Bird Droppings, Surface Water
mdtC	Plasmid	multidrug	7	Chicken Feces, Wastewater Effluent, Hospital Sewage, Human Gut, Wastewater Influent, Migratory Bird Droppings, Surface Water
aadA	Plasmid	aminoglycoside	7	Activated Sludge, Chicken Feces, Wastewater Effluent, Hospital Sewage, Wastewater Influent, Pig Feces, Surface Water
vanR	Plasmid	glycopeptide	7	Chicken Feces, Wastewater Effluent, Hospital Sewage, Human Gut, Wastewater Influent, Migratory Bird Droppings, Pig Feces
tetW	Phage	tetracycline	7	Chicken Feces, Cow Manure, Hospital Sewage, Human Gut, Wastewater Influent, Pig Feces, Surface Water
cAMP-regulatory_protein	Plasmid	unclassified	7	Activated Sludge, Chicken Feces, Wastewater Effluent, Hospital Sewage, Human Gut, Wastewater Influent, Migratory Bird Droppings
aadA25	Plasmid	aminoglycoside	7	Activated Sludge, Chicken Feces, Wastewater Effluent, Hospital Sewage, Wastewater Influent, Pig Feces, Surface Water
CRP	Plasmid	multidrug	7	Activated Sludge, Chicken Feces, Wastewater Effluent, Hospital Sewage, Human Gut, Wastewater Influent, Migratory Bird Droppings
class_A	Phage	beta-lactam	7	Activated Sludge, Chicken Feces, Wastewater Effluent, Hospital Sewage, Human Gut, Wastewater Influent, Surface Water
mdtG	Phage	multidrug	7	Chicken Feces, Wastewater Effluent, Hospital Sewage, Human Gut, Wastewater Influent, Migratory Bird Droppings, Surface Water
tet32	Integrative Element (IGE),Conjugative Element (CE)	tetracycline	7	Chicken Feces, Hospital Sewage, Human Gut, Wastewater Influent, Migratory Bird Droppings, Pig Feces, Surface Water
PBP-1A	Phage	beta-lactam	7	Chicken Feces, Cow Manure, Hospital Sewage, Human Gut, Wastewater Influent, Migratory Bird Droppings, Pig Feces
floR	Plasmid	phenicol	7	Chicken Feces, Wastewater Effluent, Hospital Sewage, Wastewater Influent, Migratory Bird Droppings, Pig Feces, Surface Water
YojI	Plasmid	peptide	7	Chicken Feces, Wastewater Effluent, Hospital Sewage, Human Gut, Wastewater Influent, Migratory Bird Droppings, Surface Water
sdiA	Plasmid	unclassified	7	Chicken Feces, Wastewater Effluent, Hospital Sewage, Human Gut, Wastewater Influent, Migratory Bird Droppings, Surface Water
chloramphenicol_exporter	Plasmid	phenicol	7	Chicken Feces, Wastewater Effluent, Hospital Sewage, Wastewater Influent, Migratory Bird Droppings, Pig Feces, Surface Water
tet32	Phage	tetracycline	7	Chicken Feces, Cow Manure, Hospital Sewage, Human Gut, Wastewater Influent, Pig Feces, Surface Water
mexE	Phage	multidrug	7	Chicken Feces, Wastewater Effluent, Hospital Sewage, Human Gut, Wastewater Influent, Migratory Bird Droppings, Surface Water
class_C	Plasmid	beta-lactam	7	Chicken Feces, Wastewater Effluent, Hospital Sewage, Human Gut, Wastewater Influent, Migratory Bird Droppings, Surface Water
erm(35)	Plasmid	MLS	7	Chicken Feces, Hospital Sewage, Human Gut, Wastewater Influent, Migratory Bird Droppings, Pig Feces, Surface Water
mdtH	Phage	multidrug	7	Chicken Feces, Wastewater Effluent, Hospital Sewage, Human Gut, Wastewater Influent, Migratory Bird Droppings, Surface Water
vanU	Phage	glycopeptide	7	Chicken Feces, Cow Manure, Hospital Sewage, Human Gut, Wastewater Influent, Migratory Bird Droppings, Pig Feces
ermF	Plasmid	MLS	7	Chicken Feces, Hospital Sewage, Human Gut, Wastewater Influent, Migratory Bird Droppings, Pig Feces, Surface Water
mdtB	Phage	multidrug	7	Chicken Feces, Wastewater Effluent, Hospital Sewage, Human Gut, Wastewater Influent, Migratory Bird Droppings, Surface Water
TolC	Plasmid	multidrug	7	Chicken Feces, Wastewater Effluent, Hospital Sewage, Human Gut, Wastewater Influent, Migratory Bird Droppings, Surface Water
acrA	Phage	multidrug	7	Chicken Feces, Wastewater Effluent, Hospital Sewage, Human Gut, Wastewater Influent, Migratory Bird Droppings, Surface Water
mexE	Plasmid	multidrug	7	Chicken Feces, Wastewater Effluent, Hospital Sewage, Human Gut, Wastewater Influent, Migratory Bird Droppings, Surface Water
macA	Phage	MLS	7	Chicken Feces, Wastewater Effluent, Hospital Sewage, Human Gut, Wastewater Influent, Migratory Bird Droppings, Surface Water
tet(W/N/W)	Integrative Element (IGE)	tetracycline	7	Chicken Feces, Cow Manure, Hospital Sewage, Human Gut, Wastewater Influent, Migratory Bird Droppings, Pig Feces
mdtB	Plasmid,Conjugative Element (CE)	multidrug	6	Activated Sludge, Wastewater Effluent, Hospital Sewage, Wastewater Influent, Migratory Bird Droppings, Soil
vanU	Integrative Element (IGE)	glycopeptide	6	Chicken Feces, Hospital Sewage, Human Gut, Wastewater Influent, Migratory Bird Droppings, Pig Feces
AcrE	Plasmid	multidrug	6	Chicken Feces, Hospital Sewage, Human Gut, Wastewater Influent, Migratory Bird Droppings, Surface Water
rosA	Phage	fosmidomycin	6	Chicken Feces, Hospital Sewage, Human Gut, Wastewater Influent, Migratory Bird Droppings, Surface Water
tet(W/N/W)	Phage	tetracycline	6	Chicken Feces, Cow Manure, Hospital Sewage, Human Gut, Wastewater Influent, Pig Feces
vanRI	Plasmid	glycopeptide	6	Chicken Feces, Hospital Sewage, Human Gut, Wastewater Influent, Migratory Bird Droppings, Pig Feces
vatB	Phage	MLS	6	Chicken Feces, Cow Manure, Hospital Sewage, Wastewater Influent, Pig Feces, Surface Water
tet34	Plasmid	tetracycline	6	Chicken Feces, Wastewater Effluent, Hospital Sewage, Human Gut, Wastewater Influent, Migratory Bird Droppings
mexX	Plasmid	multidrug	6	Chicken Feces, Hospital Sewage, Human Gut, Wastewater Influent, Migratory Bird Droppings, Surface Water
ermB	Plasmid	MLS	6	Activated Sludge, Chicken Feces, Hospital Sewage, Human Gut, Wastewater Influent, Pig Feces
mefA	Integrative Element (IGE),Conjugative Element (CE)	MLS	6	Chicken Feces, Cow Manure, Hospital Sewage, Human Gut, Wastewater Influent, Pig Feces
acrF	Plasmid	multidrug	6	Chicken Feces, Hospital Sewage, Human Gut, Wastewater Influent, Migratory Bird Droppings, Surface Water
sul2	Plasmid	sulfonamide	6	Activated Sludge, Chicken Feces, Wastewater Effluent, Hospital Sewage, Human Gut, Wastewater Influent
MuxB	Plasmid,Conjugative Element (CE)	multidrug	6	Activated Sludge, Wastewater Effluent, Hospital Sewage, Wastewater Influent, Migratory Bird Droppings, Soil
AcrF	Plasmid	multidrug	6	Chicken Feces, Hospital Sewage, Human Gut, Wastewater Influent, Migratory Bird Droppings, Surface Water
tet(W/N/W)	Phage,Conjugative Element (CE)	tetracycline	6	Chicken Feces, Cow Manure, Hospital Sewage, Human Gut, Wastewater Influent, Pig Feces
tetW	Phage,Conjugative Element (CE)	tetracycline	6	Chicken Feces, Cow Manure, Hospital Sewage, Human Gut, Wastewater Influent, Pig Feces
tet37	Phage	tetracycline	6	Chicken Feces, Cow Manure, Hospital Sewage, Human Gut, Migratory Bird Droppings, Pig Feces
AcrS	Plasmid	multidrug	6	Chicken Feces, Hospital Sewage, Human Gut, Wastewater Influent, Migratory Bird Droppings, Surface Water
tetM	Phage,Conjugative Element (CE)	tetracycline	6	Chicken Feces, Cow Manure, Hospital Sewage, Human Gut, Wastewater Influent, Pig Feces
qacH	Plasmid	fluoroquinolone	6	Activated Sludge, Chicken Feces, Wastewater Effluent, Hospital Sewage, Wastewater Influent, Surface Water
lsaE	Phage	MLS	6	Chicken Feces, Hospital Sewage, Wastewater Influent, Migratory Bird Droppings, Pig Feces, Surface Water
DNA-binding_protein_H-NS	Plasmid	unclassified	6	Chicken Feces, Wastewater Effluent, Hospital Sewage, Human Gut, Wastewater Influent, Migratory Bird Droppings
msbA	Phage	nitroimidazole	6	Chicken Feces, Hospital Sewage, Human Gut, Wastewater Influent, Migratory Bird Droppings, Surface Water
cob(I)alamin_adenolsyltransferase	Phage,Plasmid	unclassified	6	Chicken Feces, Hospital Sewage, Human Gut, Wastewater Influent, Migratory Bird Droppings, Surface Water
lnuC	Phage	MLS	6	Chicken Feces, Cow Manure, Hospital Sewage, Human Gut, Wastewater Influent, Pig Feces
rosA	Plasmid	fosmidomycin	6	Activated Sludge, Chicken Feces, Hospital Sewage, Human Gut, Wastewater Influent, Migratory Bird Droppings
macB	Plasmid	MLS	6	Chicken Feces, Hospital Sewage, Human Gut, Wastewater Influent, Migratory Bird Droppings, Pig Feces
vanRI	Phage	glycopeptide	6	Chicken Feces, Hospital Sewage, Human Gut, Wastewater Influent, Migratory Bird Droppings, Pig Feces
TEM-171	Plasmid	beta-lactam	6	Chicken Feces, Hospital Sewage, Human Gut, Wastewater Influent, Pig Feces, Surface Water
MvaT	Plasmid	multidrug	6	Cow Manure, Wastewater Effluent, Hospital Sewage, Wastewater Influent, Migratory Bird Droppings, Surface Water
CfxA2	Phage	beta-lactam	6	Chicken Feces, Cow Manure, Hospital Sewage, Human Gut, Wastewater Influent, Pig Feces
tet44	Integrative Element (IGE),Conjugative Element (CE)	tetracycline	6	Chicken Feces, Hospital Sewage, Human Gut, Wastewater Influent, Pig Feces, Surface Water
CfxA3	Phage	beta-lactam	6	Chicken Feces, Cow Manure, Hospital Sewage, Human Gut, Wastewater Influent, Pig Feces
tetO	Integrative Element (IGE),Conjugative Element (CE)	tetracycline	6	Chicken Feces, Hospital Sewage, Human Gut, Wastewater Influent, Pig Feces, Surface Water
tet32	Integrative Element (IGE)	tetracycline	6	Chicken Feces, Hospital Sewage, Human Gut, Wastewater Influent, Pig Feces, Surface Water
tet37	Plasmid	tetracycline	6	Chicken Feces, Cow Manure, Hospital Sewage, Human Gut, Migratory Bird Droppings, Pig Feces
CfxA6	Phage	beta-lactam	6	Chicken Feces, Cow Manure, Hospital Sewage, Human Gut, Wastewater Influent, Pig Feces
truncated_putative_response_regulator_ArlR	Phage	unclassified	6	Chicken Feces, Cow Manure, Hospital Sewage, Wastewater Influent, Migratory Bird Droppings, Pig Feces
vanR	Phage	glycopeptide	6	Chicken Feces, Hospital Sewage, Human Gut, Wastewater Influent, Migratory Bird Droppings, Pig Feces
mefA	Phage	MLS	6	Chicken Feces, Cow Manure, Hospital Sewage, Human Gut, Wastewater Influent, Pig Feces
tetC	Plasmid	tetracycline	5	Activated Sludge, Wastewater Effluent, Hospital Sewage, Wastewater Influent, Surface Water
lnuG	Phage	MLS	5	Hospital Sewage, Wastewater Influent, Migratory Bird Droppings, Pig Feces, Surface Water
tet37	Phage,Plasmid	tetracycline	5	Chicken Feces, Cow Manure, Human Gut, Migratory Bird Droppings, Pig Feces
tetM	Plasmid	tetracycline	5	Chicken Feces, Human Gut, Wastewater Influent, Pig Feces, Surface Water
ompF	Phage	multidrug	5	Chicken Feces, Hospital Sewage, Human Gut, Wastewater Influent, Migratory Bird Droppings
Serratia_marcescens_Omp1	Phage	multidrug	5	Chicken Feces, Hospital Sewage, Human Gut, Wastewater Influent, Migratory Bird Droppings
lnuB	Phage	MLS	5	Hospital Sewage, Wastewater Influent, Migratory Bird Droppings, Pig Feces, Surface Water
lnuD	Phage	MLS	5	Cow Manure, Hospital Sewage, Human Gut, Wastewater Influent, Pig Feces
mdtK	Phage	multidrug	5	Chicken Feces, Hospital Sewage, Human Gut, Wastewater Influent, Migratory Bird Droppings
ompR	Plasmid	multidrug	5	Activated Sludge, Chicken Feces, Hospital Sewage, Human Gut, Migratory Bird Droppings
MexK	Phage	multidrug	5	Activated Sludge, Wastewater Effluent, Hospital Sewage, Wastewater Influent, Surface Water
porin_OmpC	Phage	beta-lactam	5	Chicken Feces, Hospital Sewage, Human Gut, Wastewater Influent, Migratory Bird Droppings
sul2	Insertion Sequence (IS)	sulfonamide	5	Activated Sludge, Wastewater Effluent, Hospital Sewage, Wastewater Influent, Surface Water
aadE	Phage	aminoglycoside	5	Chicken Feces, Cow Manure, Human Gut, Migratory Bird Droppings, Pig Feces
mdtC	Plasmid,Conjugative Element (CE)	multidrug	5	Activated Sludge, Wastewater Effluent, Hospital Sewage, Wastewater Influent, Migratory Bird Droppings
abeS	Plasmid	multidrug	5	Chicken Feces, Wastewater Effluent, Hospital Sewage, Human Gut, Wastewater Influent
rosB	Plasmid	fosmidomycin	5	Chicken Feces, Hospital Sewage, Human Gut, Wastewater Influent, Migratory Bird Droppings
kdpE	Plasmid	aminoglycoside	5	Chicken Feces, Hospital Sewage, Human Gut, Wastewater Influent, Migratory Bird Droppings
AER-1	Phage	beta-lactam	5	Activated Sludge, Wastewater Effluent, Hospital Sewage, Wastewater Influent, Surface Water
mdtC	Phage	multidrug	5	Chicken Feces, Hospital Sewage, Human Gut, Wastewater Influent, Migratory Bird Droppings
patA	Plasmid	fluoroquinolone	5	Chicken Feces, Hospital Sewage, Human Gut, Wastewater Influent, Migratory Bird Droppings
macA	Plasmid	MLS	5	Chicken Feces, Hospital Sewage, Human Gut, Wastewater Influent, Migratory Bird Droppings
mtrA	Plasmid	multidrug	5	Activated Sludge, Wastewater Effluent, Hospital Sewage, Wastewater Influent, Surface Water
msrE	Plasmid	MLS	5	Activated Sludge, Wastewater Effluent, Hospital Sewage, Wastewater Influent, Surface Water
multidrug_ABC_transporter	Plasmid	multidrug	5	Chicken Feces, Wastewater Effluent, Hospital Sewage, Migratory Bird Droppings, Pig Feces
vatE	Phage	MLS	5	Chicken Feces, Hospital Sewage, Wastewater Influent, Pig Feces, Surface Water
tetA	Plasmid,Conjugative Element (CE)	tetracycline	5	Activated Sludge, Wastewater Effluent, Hospital Sewage, Wastewater Influent, Surface Water
rosB	Phage	fosmidomycin	5	Chicken Feces, Hospital Sewage, Human Gut, Wastewater Influent, Migratory Bird Droppings
tetO	Phage,Conjugative Element (CE)	tetracycline	5	Chicken Feces, Cow Manure, Hospital Sewage, Human Gut, Pig Feces
EmrB-QacA_family_major_facilitator_transporter	Phage	multidrug	5	Chicken Feces, Cow Manure, Hospital Sewage, Migratory Bird Droppings, Pig Feces
mdtE	Plasmid	multidrug	5	Chicken Feces, Hospital Sewage, Human Gut, Wastewater Influent, Migratory Bird Droppings
gadW	Plasmid	multidrug	5	Chicken Feces, Hospital Sewage, Human Gut, Wastewater Influent, Migratory Bird Droppings
DNA-binding_transcriptional_regulator_gadX	Plasmid	unclassified	5	Chicken Feces, Hospital Sewage, Human Gut, Wastewater Influent, Migratory Bird Droppings
omp36	Plasmid	multidrug	5	Chicken Feces, Hospital Sewage, Human Gut, Wastewater Influent, Migratory Bird Droppings
Klebsiella_pneumoniae_OmpK37	Plasmid	beta-lactam	5	Chicken Feces, Hospital Sewage, Human Gut, Wastewater Influent, Migratory Bird Droppings
Serratia_marcescens_Omp1	Plasmid	multidrug	5	Chicken Feces, Hospital Sewage, Human Gut, Wastewater Influent, Migratory Bird Droppings
Klebsiella_pneumoniae_OmpK36	Plasmid	beta-lactam	5	Chicken Feces, Hospital Sewage, Human Gut, Wastewater Influent, Migratory Bird Droppings
tetX	Plasmid	tetracycline	5	Chicken Feces, Cow Manure, Hospital Sewage, Wastewater Influent, Pig Feces
LlmA_23S_ribosomal_RNA_methyltransferase	Phage	MLS	5	Chicken Feces, Cow Manure, Human Gut, Migratory Bird Droppings, Pig Feces
DNA-binding_protein_H-NS	Phage	unclassified	5	Chicken Feces, Wastewater Effluent, Hospital Sewage, Human Gut, Migratory Bird Droppings
Klebsiella_pneumoniae_OmpK36	Phage	beta-lactam	5	Chicken Feces, Hospital Sewage, Human Gut, Wastewater Influent, Migratory Bird Droppings
cat_chloramphenicol_acetyltransferase	Phage	phenicol	5	Chicken Feces, Hospital Sewage, Human Gut, Wastewater Influent, Pig Feces
mdtF	Plasmid	multidrug	5	Chicken Feces, Hospital Sewage, Human Gut, Wastewater Influent, Migratory Bird Droppings
msbA	Plasmid	nitroimidazole	5	Chicken Feces, Hospital Sewage, Human Gut, Wastewater Influent, Migratory Bird Droppings
bacA	Phage,Conjugative Element (CE)	bacitracin	5	Chicken Feces, Hospital Sewage, Human Gut, Migratory Bird Droppings, Pig Feces
tetC	Plasmid,Conjugative Element (CE)	tetracycline	5	Activated Sludge, Wastewater Effluent, Hospital Sewage, Wastewater Influent, Surface Water
Klebsiella_pneumoniae_OmpK37	Phage	beta-lactam	5	Chicken Feces, Hospital Sewage, Human Gut, Wastewater Influent, Migratory Bird Droppings
tetQ	Plasmid	tetracycline	5	Chicken Feces, Cow Manure, Hospital Sewage, Pig Feces, Surface Water
omp36	Phage	multidrug	5	Chicken Feces, Hospital Sewage, Human Gut, Wastewater Influent, Migratory Bird Droppings
ompF	Plasmid	multidrug	5	Chicken Feces, Hospital Sewage, Human Gut, Wastewater Influent, Migratory Bird Droppings
cAMP-regulatory_protein	Phage	unclassified	5	Chicken Feces, Wastewater Effluent, Hospital Sewage, Wastewater Influent, Sediment
vanR	Plasmid,Conjugative Element (CE)	glycopeptide	5	Cow Manure, Wastewater Effluent, Hospital Sewage, Migratory Bird Droppings, Soil
LlmA_23S_ribosomal_RNA_methyltransferase	Plasmid	MLS	5	Chicken Feces, Cow Manure, Human Gut, Migratory Bird Droppings, Pig Feces
MuxB	Plasmid	multidrug	5	Wastewater Effluent, Hospital Sewage, Wastewater Influent, Surface Water, Sediment
MexK	Plasmid	multidrug	5	Activated Sludge, Wastewater Effluent, Hospital Sewage, Wastewater Influent, Surface Water
truncated_putative_response_regulator_ArlR	Plasmid	unclassified	5	Chicken Feces, Cow Manure, Wastewater Influent, Migratory Bird Droppings, Pig Feces
eptA	Plasmid	peptide	5	Chicken Feces, Hospital Sewage, Human Gut, Wastewater Influent, Migratory Bird Droppings
porin_OmpC	Plasmid	beta-lactam	5	Chicken Feces, Hospital Sewage, Human Gut, Wastewater Influent, Migratory Bird Droppings
tet44	Phage	tetracycline	5	Chicken Feces, Human Gut, Wastewater Influent, Pig Feces, Surface Water
lnuC	Phage,Conjugative Element (CE)	MLS	5	Cow Manure, Hospital Sewage, Human Gut, Wastewater Influent, Pig Feces
lnuD	Phage,Conjugative Element (CE)	MLS	5	Cow Manure, Hospital Sewage, Human Gut, Wastewater Influent, Pig Feces
vanR	Integrative Element (IGE),Conjugative Element (CE)	glycopeptide	5	Chicken Feces, Hospital Sewage, Human Gut, Wastewater Influent, Pig Feces
tetQ	Integrative Element (IGE)	tetracycline	5	Chicken Feces, Hospital Sewage, Human Gut, Wastewater Influent, Pig Feces
AER-1	Plasmid	beta-lactam	5	Activated Sludge, Wastewater Effluent, Hospital Sewage, Wastewater Influent, Surface Water
vanRI	Integrative Element (IGE),Conjugative Element (CE)	glycopeptide	5	Chicken Feces, Hospital Sewage, Human Gut, Wastewater Influent, Pig Feces
OXA-257	Plasmid	beta-lactam	4	Wastewater Effluent, Hospital Sewage, Wastewater Influent, Surface Water
transcriptional_regulatory_protein_CpxR_cpxR	Plasmid	unclassified	4	Chicken Feces, Hospital Sewage, Wastewater Influent, Migratory Bird Droppings
mdtD	Plasmid	multidrug	4	Chicken Feces, Hospital Sewage, Human Gut, Migratory Bird Droppings
tetD	Phage	tetracycline	4	Chicken Feces, Hospital Sewage, Human Gut, Migratory Bird Droppings
cob(I)alamin_adenolsyltransferase	Phage	unclassified	4	Chicken Feces, Hospital Sewage, Human Gut, Migratory Bird Droppings
aph(3')-I	Plasmid	aminoglycoside	4	Wastewater Effluent, Hospital Sewage, Wastewater Influent, Migratory Bird Droppings
mdtA	Plasmid	multidrug	4	Chicken Feces, Hospital Sewage, Human Gut, Migratory Bird Droppings
OXA-97	Plasmid	beta-lactam	4	Wastewater Effluent, Hospital Sewage, Wastewater Influent, Surface Water
cob(I)alamin_adenolsyltransferase	Plasmid	unclassified	4	Chicken Feces, Hospital Sewage, Human Gut, Migratory Bird Droppings
baeS	Plasmid	multidrug	4	Chicken Feces, Hospital Sewage, Human Gut, Migratory Bird Droppings
acrD	Phage	aminoglycoside	4	Chicken Feces, Hospital Sewage, Human Gut, Migratory Bird Droppings
mphD	Plasmid	MLS	4	Activated Sludge, Wastewater Effluent, Hospital Sewage, Wastewater Influent
mphG	Plasmid	MLS	4	Activated Sludge, Wastewater Effluent, Hospital Sewage, Wastewater Influent
baeR	Plasmid	multidrug	4	Chicken Feces, Hospital Sewage, Human Gut, Migratory Bird Droppings
msbA	Plasmid,Conjugative Element (CE)	nitroimidazole	4	Chicken Feces, Hospital Sewage, Human Gut, Migratory Bird Droppings
Serratia_marcescens_Omp1	Plasmid,Conjugative Element (CE)	multidrug	4	Chicken Feces, Hospital Sewage, Human Gut, Migratory Bird Droppings
OXA-96	Plasmid	beta-lactam	4	Wastewater Effluent, Hospital Sewage, Wastewater Influent, Surface Water
baeR	Phage	multidrug	4	Chicken Feces, Hospital Sewage, Human Gut, Migratory Bird Droppings
ermB	Phage	MLS	4	Hospital Sewage, Human Gut, Wastewater Influent, Pig Feces
efrB	Phage	multidrug	4	Chicken Feces, Hospital Sewage, Wastewater Influent, Migratory Bird Droppings
ant(3'')-Ih-aac(6')-IId	Plasmid	aminoglycoside	4	Activated Sludge, Hospital Sewage, Wastewater Influent, Surface Water
sdiA	Phage	unclassified	4	Chicken Feces, Hospital Sewage, Human Gut, Migratory Bird Droppings
OXA-58	Plasmid	beta-lactam	4	Wastewater Effluent, Hospital Sewage, Wastewater Influent, Surface Water
aph(3''')-III	Integrative Element (IGE)	aminoglycoside	4	Chicken Feces, Wastewater Influent, Migratory Bird Droppings, Pig Feces
kasugamycin_resistance_protein_ksgA	Phage	aminoglycoside	4	Chicken Feces, Hospital Sewage, Human Gut, Migratory Bird Droppings
vanTG	Phage	glycopeptide	4	Chicken Feces, Hospital Sewage, Human Gut, Pig Feces
oprM	Integrative Element (IGE)	multidrug	4	Activated Sludge, Wastewater Effluent, Hospital Sewage, Wastewater Influent
baeS	Phage	multidrug	4	Chicken Feces, Hospital Sewage, Human Gut, Migratory Bird Droppings
OXA-9	Plasmid	beta-lactam	4	Wastewater Effluent, Hospital Sewage, Wastewater Influent, Surface Water
tet36	Plasmid,Conjugative Element (CE)	tetracycline	4	Chicken Feces, Hospital Sewage, Human Gut, Wastewater Influent
OXA-32	Plasmid	beta-lactam	4	Activated Sludge, Wastewater Effluent, Hospital Sewage, Wastewater Influent
tet36	Integrative Element (IGE)	tetracycline	4	Chicken Feces, Hospital Sewage, Human Gut, Wastewater Influent
kasugamycin_resistance_protein_ksgA	Plasmid	aminoglycoside	4	Chicken Feces, Hospital Sewage, Human Gut, Migratory Bird Droppings
tetD	Plasmid	tetracycline	4	Chicken Feces, Hospital Sewage, Human Gut, Migratory Bird Droppings
OXA-36	Plasmid	beta-lactam	4	Activated Sludge, Wastewater Effluent, Hospital Sewage, Wastewater Influent
qnrS	Plasmid	fluoroquinolone	4	Chicken Feces, Wastewater Effluent, Hospital Sewage, Wastewater Influent
OXA-415	Plasmid	beta-lactam	4	Activated Sludge, Wastewater Effluent, Hospital Sewage, Wastewater Influent
acrD	Plasmid	aminoglycoside	4	Chicken Feces, Hospital Sewage, Human Gut, Migratory Bird Droppings
OXA-46	Plasmid	beta-lactam	4	Activated Sludge, Wastewater Effluent, Hospital Sewage, Wastewater Influent
OXA-230	Plasmid	beta-lactam	4	Wastewater Effluent, Hospital Sewage, Wastewater Influent, Surface Water
OXA-53	Plasmid	beta-lactam	4	Activated Sludge, Wastewater Effluent, Hospital Sewage, Wastewater Influent
QnrS8	Plasmid	fluoroquinolone	4	Chicken Feces, Wastewater Effluent, Hospital Sewage, Wastewater Influent
OXA-355	Plasmid	beta-lactam	4	Wastewater Effluent, Hospital Sewage, Wastewater Influent, Surface Water
sul2	Plasmid,Conjugative Element (CE)	sulfonamide	4	Activated Sludge, Chicken Feces, Hospital Sewage, Wastewater Influent
QnrS7	Plasmid	fluoroquinolone	4	Chicken Feces, Wastewater Effluent, Hospital Sewage, Wastewater Influent
catD	Phage	phenicol	4	Chicken Feces, Hospital Sewage, Human Gut, Pig Feces
QnrS6	Plasmid	fluoroquinolone	4	Chicken Feces, Wastewater Effluent, Hospital Sewage, Wastewater Influent
CRP	Phage	multidrug	4	Chicken Feces, Wastewater Effluent, Hospital Sewage, Wastewater Influent
QnrS5	Plasmid	fluoroquinolone	4	Chicken Feces, Wastewater Effluent, Hospital Sewage, Wastewater Influent
QnrS3	Plasmid	fluoroquinolone	4	Chicken Feces, Wastewater Effluent, Hospital Sewage, Wastewater Influent
OXA-164	Plasmid	beta-lactam	4	Wastewater Effluent, Hospital Sewage, Wastewater Influent, Surface Water
OXA-229	Plasmid	beta-lactam	4	Wastewater Effluent, Hospital Sewage, Wastewater Influent, Surface Water
tetQ	Plasmid,Conjugative Element (CE)	tetracycline	4	Chicken Feces, Hospital Sewage, Human Gut, Wastewater Influent
tet37	Integrative Element (IGE)	tetracycline	4	Chicken Feces, Hospital Sewage, Wastewater Influent, Migratory Bird Droppings
OXA-356	Plasmid	beta-lactam	4	Wastewater Effluent, Hospital Sewage, Wastewater Influent, Surface Water
OXA-118	Plasmid	beta-lactam	4	Activated Sludge, Wastewater Effluent, Hospital Sewage, Wastewater Influent
Escherichia_coli_mipA	Plasmid	multidrug	4	Chicken Feces, Hospital Sewage, Human Gut, Migratory Bird Droppings
mefA	Integrative Element (IGE)	MLS	4	Chicken Feces, Cow Manure, Hospital Sewage, Human Gut
TolC	Phage	multidrug	4	Chicken Feces, Hospital Sewage, Human Gut, Migratory Bird Droppings
OXA-119	Plasmid	beta-lactam	4	Activated Sludge, Wastewater Effluent, Hospital Sewage, Wastewater Influent
patA	Phage	fluoroquinolone	4	Chicken Feces, Hospital Sewage, Human Gut, Migratory Bird Droppings
mdtA	Phage	multidrug	4	Chicken Feces, Hospital Sewage, Human Gut, Migratory Bird Droppings
OXA-141	Plasmid	beta-lactam	4	Activated Sludge, Wastewater Effluent, Hospital Sewage, Wastewater Influent
marA	Phage	multidrug	4	Chicken Feces, Hospital Sewage, Human Gut, Migratory Bird Droppings
OXA-15	Plasmid	beta-lactam	4	Activated Sludge, Wastewater Effluent, Hospital Sewage, Wastewater Influent
OXA-420	Plasmid	beta-lactam	4	Wastewater Effluent, Hospital Sewage, Wastewater Influent, Surface Water
OXA-161	Plasmid	beta-lactam	4	Activated Sludge, Wastewater Effluent, Hospital Sewage, Wastewater Influent
mdtD	Phage	multidrug	4	Chicken Feces, Hospital Sewage, Human Gut, Migratory Bird Droppings
OXA-2	Plasmid	beta-lactam	4	Activated Sludge, Wastewater Effluent, Hospital Sewage, Wastewater Influent
OXA-205	Plasmid	beta-lactam	4	Activated Sludge, Wastewater Effluent, Hospital Sewage, Wastewater Influent
mdtE	Phage	multidrug	4	Chicken Feces, Hospital Sewage, Human Gut, Migratory Bird Droppings
OXA-21	Plasmid	beta-lactam	4	Activated Sludge, Wastewater Effluent, Hospital Sewage, Wastewater Influent
mexN	Plasmid,Conjugative Element (CE)	multidrug	4	Wastewater Effluent, Hospital Sewage, Wastewater Influent, Migratory Bird Droppings
tet44	Integrative Element (IGE)	tetracycline	4	Chicken Feces, Human Gut, Wastewater Influent, Surface Water
OXA-210	Plasmid	beta-lactam	4	Activated Sludge, Wastewater Effluent, Hospital Sewage, Wastewater Influent
OXA-418	Plasmid	beta-lactam	4	Wastewater Effluent, Hospital Sewage, Wastewater Influent, Surface Water
bicyclomycin-multidrug_efflux_protein_bcr	Phage	multidrug	4	Chicken Feces, Hospital Sewage, Human Gut, Migratory Bird Droppings
OXA-397	Plasmid	beta-lactam	4	Wastewater Effluent, Hospital Sewage, Wastewater Influent, Surface Water
OXA-226	Plasmid	beta-lactam	4	Activated Sludge, Wastewater Effluent, Hospital Sewage, Wastewater Influent
efrB	Plasmid	multidrug	4	Chicken Feces, Hospital Sewage, Wastewater Influent, Migratory Bird Droppings
ompF	Plasmid,Conjugative Element (CE)	multidrug	4	Chicken Feces, Hospital Sewage, Human Gut, Migratory Bird Droppings
OXA-3	Plasmid	beta-lactam	4	Activated Sludge, Wastewater Effluent, Hospital Sewage, Wastewater Influent
tetQ	Phage	tetracycline	4	Chicken Feces, Cow Manure, Hospital Sewage, Wastewater Influent
QnrS9	Plasmid	fluoroquinolone	4	Chicken Feces, Wastewater Effluent, Hospital Sewage, Wastewater Influent
multidrug_ABC_transporter	Phage	multidrug	4	Activated Sludge, Chicken Feces, Pig Feces, Surface Water
ugd	Phage,Conjugative Element (CE)	peptide	4	Chicken Feces, Cow Manure, Hospital Sewage, Human Gut
mdtL	Plasmid	multidrug	4	Chicken Feces, Hospital Sewage, Human Gut, Migratory Bird Droppings
emrR	Phage	fluoroquinolone	4	Chicken Feces, Hospital Sewage, Human Gut, Migratory Bird Droppings
emrB	Phage	multidrug	4	Chicken Feces, Hospital Sewage, Human Gut, Migratory Bird Droppings
emrA	Phage	multidrug	4	Chicken Feces, Hospital Sewage, Human Gut, Migratory Bird Droppings
oprM	Plasmid	multidrug	4	Activated Sludge, Wastewater Effluent, Hospital Sewage, Wastewater Influent
rpoB2	Phage	multidrug	4	Activated Sludge, Chicken Feces, Wastewater Effluent, Surface Water
class_C	Phage,Conjugative Element (CE)	beta-lactam	4	Chicken Feces, Hospital Sewage, Human Gut, Migratory Bird Droppings
mexC	Plasmid	multidrug	4	Wastewater Effluent, Hospital Sewage, Wastewater Influent, Surface Water
oqxB	Plasmid	multidrug	4	Activated Sludge, Wastewater Effluent, Hospital Sewage, Wastewater Influent
ACI-1	Phage	beta-lactam	4	Cow Manure, Human Gut, Wastewater Influent, Pig Feces
sul2	Phage,Plasmid	sulfonamide	4	Activated Sludge, Hospital Sewage, Human Gut, Wastewater Influent
class_C	Phage	beta-lactam	4	Chicken Feces, Hospital Sewage, Human Gut, Migratory Bird Droppings
mdfA	Phage	multidrug	4	Chicken Feces, Hospital Sewage, Human Gut, Migratory Bird Droppings
lsa	Phage,Conjugative Element (CE)	MLS	4	Chicken Feces, Cow Manure, Wastewater Influent, Pig Feces
dfrC	Phage	diaminopyrimidine	4	Activated Sludge, Cow Manure, Wastewater Effluent, Hospital Sewage
emrD	Plasmid	multidrug	4	Chicken Feces, Hospital Sewage, Human Gut, Migratory Bird Droppings
emrD	Phage	multidrug	4	Chicken Feces, Hospital Sewage, Human Gut, Migratory Bird Droppings
mdtG	Plasmid	multidrug	4	Chicken Feces, Hospital Sewage, Human Gut, Migratory Bird Droppings
oprM	Integrative Element (IGE),Conjugative Element (CE)	multidrug	4	Activated Sludge, Wastewater Effluent, Hospital Sewage, Wastewater Influent
emrB	Plasmid	multidrug	4	Chicken Feces, Hospital Sewage, Wastewater Influent, Migratory Bird Droppings
oprM	Phage	multidrug	4	Activated Sludge, Wastewater Effluent, Hospital Sewage, Wastewater Influent
OXA-183	Plasmid	beta-lactam	3	Wastewater Effluent, Hospital Sewage, Wastewater Influent
CRP	Plasmid,Conjugative Element (CE)	multidrug	3	Chicken Feces, Hospital Sewage, Migratory Bird Droppings
dfrA1	Plasmid	diaminopyrimidine	3	Chicken Feces, Hospital Sewage, Migratory Bird Droppings
OXA-233	Plasmid	beta-lactam	3	Wastewater Effluent, Hospital Sewage, Wastewater Influent
abeS	Phage	multidrug	3	Chicken Feces, Hospital Sewage, Human Gut
OXA-17	Plasmid	beta-lactam	3	Wastewater Effluent, Hospital Sewage, Wastewater Influent
mefA	Plasmid	MLS	3	Chicken Feces, Pig Feces, Surface Water
vanG	Phage	glycopeptide	3	Chicken Feces, Human Gut, Pig Feces
tet(40)	Phage	tetracycline	3	Chicken Feces, Wastewater Influent, Pig Feces
ADC-12	Plasmid,Conjugative Element (CE)	beta-lactam	3	Wastewater Effluent, Hospital Sewage, Wastewater Influent
ADC-43	Plasmid,Conjugative Element (CE)	beta-lactam	3	Wastewater Effluent, Hospital Sewage, Wastewater Influent
OXA-19	Plasmid	beta-lactam	3	Wastewater Effluent, Hospital Sewage, Wastewater Influent
ADC-41	Plasmid,Conjugative Element (CE)	beta-lactam	3	Wastewater Effluent, Hospital Sewage, Wastewater Influent
cAMP-regulatory_protein	Plasmid,Conjugative Element (CE)	unclassified	3	Chicken Feces, Hospital Sewage, Migratory Bird Droppings
mexW	Phage,Conjugative Element (CE)	multidrug	3	Wastewater Effluent, Hospital Sewage, Migratory Bird Droppings
OXA-20	Plasmid	beta-lactam	3	Wastewater Effluent, Hospital Sewage, Wastewater Influent
ADC-16	Plasmid,Conjugative Element (CE)	beta-lactam	3	Wastewater Effluent, Hospital Sewage, Wastewater Influent
golS	Phage	multidrug	3	Activated Sludge, Wastewater Effluent, Hospital Sewage
OXA-145	Plasmid	beta-lactam	3	Wastewater Effluent, Hospital Sewage, Wastewater Influent
tet40	Integrative Element (IGE)	tetracycline	3	Chicken Feces, Cow Manure, Pig Feces
aac(6')-30-aac(6')-Ib'	Plasmid	aminoglycoside	3	Activated Sludge, Hospital Sewage, Wastewater Influent
cpxA	Plasmid	aminoglycoside:aminocoumarin	3	Chicken Feces, Hospital Sewage, Migratory Bird Droppings
aac(6')-I	Plasmid	aminoglycoside	3	Activated Sludge, Hospital Sewage, Wastewater Influent
MdtK	Plasmid	fluoroquinolone	3	Chicken Feces, Hospital Sewage, Migratory Bird Droppings
OXA-10	Plasmid	beta-lactam	3	Wastewater Effluent, Hospital Sewage, Wastewater Influent
OXA-101	Plasmid	beta-lactam	3	Wastewater Effluent, Hospital Sewage, Wastewater Influent
OXA-11	Plasmid	beta-lactam	3	Wastewater Effluent, Hospital Sewage, Wastewater Influent
cat_chloramphenicol_acetyltransferase	Plasmid	phenicol	3	Chicken Feces, Hospital Sewage, Surface Water
OXA-13	Plasmid	beta-lactam	3	Wastewater Effluent, Hospital Sewage, Wastewater Influent
emrE	Plasmid,Conjugative Element (CE)	multidrug	3	Chicken Feces, Hospital Sewage, Wastewater Influent
golS	Plasmid	multidrug	3	Wastewater Effluent, Hospital Sewage, Wastewater Influent
tet36	Phage	tetracycline	3	Chicken Feces, Hospital Sewage, Wastewater Influent
tet41	Plasmid	tetracycline	3	Wastewater Effluent, Hospital Sewage, Wastewater Influent
OXA-142	Plasmid	beta-lactam	3	Wastewater Effluent, Hospital Sewage, Wastewater Influent
tet39	Plasmid	tetracycline	3	Wastewater Effluent, Hospital Sewage, Wastewater Influent
ADC-43	Plasmid	beta-lactam	3	Wastewater Effluent, Hospital Sewage, Wastewater Influent
ADC-41	Plasmid	beta-lactam	3	Wastewater Effluent, Hospital Sewage, Wastewater Influent
ADC-20	Plasmid	beta-lactam	3	Wastewater Effluent, Hospital Sewage, Wastewater Influent
tetQ	Insertion Sequence (IS)	tetracycline	3	Cow Manure, Hospital Sewage, Pig Feces
OXA-147	Plasmid	beta-lactam	3	Wastewater Effluent, Hospital Sewage, Wastewater Influent
tet40	Phage	tetracycline	3	Chicken Feces, Wastewater Influent, Pig Feces
tet(40)	Integrative Element (IGE)	tetracycline	3	Chicken Feces, Cow Manure, Pig Feces
ADC-16	Plasmid	beta-lactam	3	Wastewater Effluent, Hospital Sewage, Wastewater Influent
dfrA5	Plasmid	diaminopyrimidine	3	Chicken Feces, Hospital Sewage, Migratory Bird Droppings
OXA-240	Plasmid	beta-lactam	3	Wastewater Effluent, Hospital Sewage, Wastewater Influent
tet34	Phage	tetracycline	3	Chicken Feces, Hospital Sewage, Migratory Bird Droppings
OXA-56	Plasmid	beta-lactam	3	Wastewater Effluent, Hospital Sewage, Wastewater Influent
PmrF	Plasmid	peptide	3	Chicken Feces, Wastewater Influent, Migratory Bird Droppings
EmrB-QacA_family_major_facilitator_transporter	Plasmid	multidrug	3	Chicken Feces, Migratory Bird Droppings, Pig Feces
OXA-74	Plasmid	beta-lactam	3	Wastewater Effluent, Hospital Sewage, Wastewater Influent
arnA	Plasmid	polymyxin	3	Chicken Feces, Wastewater Influent, Migratory Bird Droppings
golS	Integrative Element (IGE),Conjugative Element (CE)	multidrug	3	Wastewater Effluent, Hospital Sewage, Wastewater Influent
mexD	Plasmid	multidrug	3	Hospital Sewage, Wastewater Influent, Migratory Bird Droppings
AAC(6')-Ie-APH(2'')-Ia	Plasmid	aminoglycoside	3	Chicken Feces, Hospital Sewage, Wastewater Influent
dfrE	Phage	diaminopyrimidine	3	Hospital Sewage, Wastewater Influent, Migratory Bird Droppings
bifunctional_aminoglycoside_N-acetyltransferase_and_aminoglycoside_phosphotransferase	Plasmid	aminoglycoside	3	Chicken Feces, Hospital Sewage, Wastewater Influent
ADC-8	Phage	beta-lactam	3	Wastewater Effluent, Hospital Sewage, Wastewater Influent
OXA-9	Phage,Plasmid	beta-lactam	3	Hospital Sewage, Wastewater Influent, Migratory Bird Droppings
DNA-binding_protein_H-NS	Phage,Plasmid	unclassified	3	Chicken Feces, Hospital Sewage, Migratory Bird Droppings
ant(2'')-I	Plasmid	aminoglycoside	3	Chicken Feces, Hospital Sewage, Wastewater Influent
tetO	Integrative Element (IGE)	tetracycline	3	Human Gut, Wastewater Influent, Surface Water
tetC	Phage	tetracycline	3	Wastewater Effluent, Hospital Sewage, Wastewater Influent
abeS	Phage,Conjugative Element (CE)	multidrug	3	Chicken Feces, Hospital Sewage, Human Gut
ampC	Plasmid	beta-lactam	3	Hospital Sewage, Wastewater Influent, Migratory Bird Droppings
lsaE	Phage,Conjugative Element (CE)	MLS	3	Cow Manure, Wastewater Influent, Pig Feces
AcrF	Phage	multidrug	3	Chicken Feces, Human Gut, Migratory Bird Droppings
acrF	Phage	multidrug	3	Chicken Feces, Human Gut, Migratory Bird Droppings
mexT	Phage	multidrug	3	Wastewater Effluent, Wastewater Influent, Migratory Bird Droppings
mexX	Phage	multidrug	3	Chicken Feces, Human Gut, Migratory Bird Droppings
Pseudomonas_aeruginosa_emrE	Plasmid	aminoglycoside	3	Wastewater Effluent, Hospital Sewage, Migratory Bird Droppings
Type_A_NfxB	Plasmid	multidrug	3	Hospital Sewage, Wastewater Influent, Surface Water
OpmH	Plasmid	triclosan	3	Wastewater Effluent, Hospital Sewage, Migratory Bird Droppings
dfrA15	Plasmid	diaminopyrimidine	3	Chicken Feces, Hospital Sewage, Migratory Bird Droppings
OXA-246	Plasmid	beta-lactam	3	Wastewater Effluent, Hospital Sewage, Wastewater Influent
dfrA16	Plasmid	diaminopyrimidine	3	Chicken Feces, Hospital Sewage, Migratory Bird Droppings
tet36	Plasmid	tetracycline	3	Chicken Feces, Hospital Sewage, Surface Water
OXA-251	Plasmid	beta-lactam	3	Wastewater Effluent, Hospital Sewage, Wastewater Influent
OXA-9	Phage	beta-lactam	3	Hospital Sewage, Migratory Bird Droppings, Surface Water
mdtL	Phage	multidrug	3	Chicken Feces, Human Gut, Migratory Bird Droppings
OXA-28	Plasmid	beta-lactam	3	Wastewater Effluent, Hospital Sewage, Wastewater Influent
aph(3''')-III	Phage	aminoglycoside	3	Chicken Feces, Migratory Bird Droppings, Pig Feces
catB	Plasmid	phenicol	3	Chicken Feces, Hospital Sewage, Surface Water
OXA-34	Plasmid	beta-lactam	3	Wastewater Effluent, Hospital Sewage, Wastewater Influent
OXA-454	Plasmid	beta-lactam	3	Wastewater Effluent, Hospital Sewage, Wastewater Influent
aad(9)	Phage	aminoglycoside	3	Chicken Feces, Migratory Bird Droppings, Pig Feces
OXA-35	Plasmid	beta-lactam	3	Wastewater Effluent, Hospital Sewage, Wastewater Influent
acrB	Plasmid,Conjugative Element (CE)	multidrug	3	Wastewater Effluent, Hospital Sewage, Migratory Bird Droppings
ant(9)-I	Phage	aminoglycoside	3	Chicken Feces, Migratory Bird Droppings, Pig Feces
mdfA	Plasmid	multidrug	3	Chicken Feces, Hospital Sewage, Migratory Bird Droppings
mexB	Phage	multidrug	3	Hospital Sewage, Wastewater Influent, Migratory Bird Droppings
LlmA_23S_ribosomal_RNA_methyltransferase	Plasmid,Conjugative Element (CE)	MLS	3	Chicken Feces, Human Gut, Migratory Bird Droppings
Klebsiella_pneumoniae_OmpK37	Plasmid,Conjugative Element (CE)	beta-lactam	3	Chicken Feces, Human Gut, Migratory Bird Droppings
ermF	Integrative Element (IGE)	MLS	3	Chicken Feces, Hospital Sewage, Pig Feces
aac(3)-II	Plasmid	aminoglycoside	3	Chicken Feces, Hospital Sewage, Wastewater Influent
erm(35)	Integrative Element (IGE)	MLS	3	Chicken Feces, Hospital Sewage, Pig Feces
aadA13	Plasmid	aminoglycoside	3	Chicken Feces, Hospital Sewage, Wastewater Influent
AAC(6')-Ib8	Plasmid	aminoglycoside	3	Activated Sludge, Hospital Sewage, Wastewater Influent
ADC-12	Plasmid	beta-lactam	3	Wastewater Effluent, Hospital Sewage, Wastewater Influent
mdtN	Plasmid	multidrug	3	Chicken Feces, Human Gut, Migratory Bird Droppings
mdtO	Plasmid	multidrug	3	Chicken Feces, Human Gut, Migratory Bird Droppings
lsa	Plasmid,Conjugative Element (CE)	MLS	3	Chicken Feces, Cow Manure, Pig Feces
mdtP	Plasmid	multidrug	3	Chicken Feces, Human Gut, Migratory Bird Droppings
tet(W/N/W)	Plasmid,Conjugative Element (CE)	tetracycline	3	Chicken Feces, Cow Manure, Pig Feces
mdtK	Plasmid	multidrug	3	Chicken Feces, Human Gut, Migratory Bird Droppings
aph(3''')-III	Phage,Conjugative Element (CE)	aminoglycoside	3	Chicken Feces, Migratory Bird Droppings, Pig Feces
Escherichia_coli_mdfA	Phage	multidrug	3	Chicken Feces, Hospital Sewage, Human Gut
tetM	Plasmid,Conjugative Element (CE)	tetracycline	3	Chicken Feces, Cow Manure, Pig Feces
tetW	Plasmid,Conjugative Element (CE)	tetracycline	3	Chicken Feces, Cow Manure, Pig Feces
aph(6)-I	Plasmid,Conjugative Element (CE)	aminoglycoside	3	Chicken Feces, Human Gut, Wastewater Influent
CfxA2	Plasmid,Conjugative Element (CE)	beta-lactam	3	Chicken Feces, Cow Manure, Hospital Sewage
vanU	Plasmid	glycopeptide	3	Chicken Feces, Cow Manure, Wastewater Influent
ermX	Insertion Sequence (IS)	MLS	3	Chicken Feces, Hospital Sewage, Wastewater Influent
mphA	Plasmid	MLS	3	Chicken Feces, Hospital Sewage, Wastewater Influent
bacterial_regulatory_protein_LuxR	Plasmid	unclassified	3	Chicken Feces, Hospital Sewage, Wastewater Influent
tet40	Integrative Element (IGE),Conjugative Element (CE)	tetracycline	3	Chicken Feces, Cow Manure, Pig Feces
ANT(3'')-IIa	Plasmid,Conjugative Element (CE)	aminoglycoside	3	Wastewater Effluent, Hospital Sewage, Wastewater Influent
tet(40)	Integrative Element (IGE),Conjugative Element (CE)	tetracycline	3	Chicken Feces, Cow Manure, Pig Feces
aadE	Plasmid	aminoglycoside	3	Chicken Feces, Hospital Sewage, Wastewater Influent
ErmX	Insertion Sequence (IS)	MLS	3	Chicken Feces, Hospital Sewage, Wastewater Influent
vatB	Phage,Conjugative Element (CE)	MLS	3	Chicken Feces, Wastewater Influent, Surface Water
ANT(3'')-IIb	Plasmid,Conjugative Element (CE)	aminoglycoside	3	Wastewater Effluent, Hospital Sewage, Wastewater Influent
lsa	Integrative Element (IGE)	MLS	3	Chicken Feces, Cow Manure, Pig Feces
ANT(3'')-IIc	Plasmid,Conjugative Element (CE)	aminoglycoside	3	Wastewater Effluent, Hospital Sewage, Wastewater Influent
dfrA1	Phage	diaminopyrimidine	3	Activated Sludge, Wastewater Effluent, Surface Water
tetD	Insertion Sequence (IS)	tetracycline	3	Chicken Feces, Hospital Sewage, Wastewater Influent
CfxA3	Plasmid,Conjugative Element (CE)	beta-lactam	3	Chicken Feces, Cow Manure, Hospital Sewage
Mrx	Plasmid	MLS	3	Chicken Feces, Hospital Sewage, Wastewater Influent
aac(3)-Ib-aac(6')-Ib	Plasmid	aminoglycoside	3	Activated Sludge, Hospital Sewage, Wastewater Influent
AAC(6')-Ib'	Plasmid	aminoglycoside	3	Activated Sludge, Hospital Sewage, Wastewater Influent
AAC(6')-Ib7	Plasmid	aminoglycoside	3	Activated Sludge, Hospital Sewage, Wastewater Influent
acrB	Phage,Conjugative Element (CE)	multidrug	3	Wastewater Effluent, Hospital Sewage, Migratory Bird Droppings
rpoB2	Phage,Conjugative Element (CE)	multidrug	3	Activated Sludge, Wastewater Effluent, Surface Water
mexB	Phage,Conjugative Element (CE)	multidrug	3	Wastewater Effluent, Hospital Sewage, Wastewater Influent
cmlA	Plasmid	phenicol	3	Hospital Sewage, Wastewater Influent, Surface Water
CfxA6	Plasmid,Conjugative Element (CE)	beta-lactam	3	Chicken Feces, Cow Manure, Hospital Sewage
CMY-56	Plasmid	beta-lactam	2	Hospital Sewage, Wastewater Influent
CMY-6	Plasmid	beta-lactam	2	Hospital Sewage, Wastewater Influent
ermT	Plasmid	MLS	2	Chicken Feces, Pig Feces
CMY-69	Plasmid,Conjugative Element (CE)	beta-lactam	2	Hospital Sewage, Wastewater Influent
CMY-62	Plasmid	beta-lactam	2	Hospital Sewage, Wastewater Influent
CMY-99	Plasmid,Conjugative Element (CE)	beta-lactam	2	Hospital Sewage, Wastewater Influent
YojI	Phage	peptide	2	Chicken Feces, Migratory Bird Droppings
aadA	Integrative Element (IGE)	aminoglycoside	2	Chicken Feces, Wastewater Influent
VEB-3	Plasmid	beta-lactam	2	Activated Sludge, Hospital Sewage
CfxA2	Integrative Element (IGE)	beta-lactam	2	Human Gut, Pig Feces
ermG	Integrative Element (IGE),Conjugative Element (CE)	MLS	2	Chicken Feces, Pig Feces
PBP-1A	Plasmid	beta-lactam	2	Chicken Feces, Wastewater Influent
emrB	Plasmid,Conjugative Element (CE)	multidrug	2	Hospital Sewage, Wastewater Influent
adeR	Plasmid	multidrug	2	Hospital Sewage, Wastewater Influent
CMY-6	Plasmid,Conjugative Element (CE)	beta-lactam	2	Hospital Sewage, Wastewater Influent
ermT	Integrative Element (IGE),Conjugative Element (CE)	MLS	2	Chicken Feces, Pig Feces
ugd	Integrative Element (IGE)	peptide	2	Chicken Feces, Wastewater Effluent
CMY-4	Plasmid	beta-lactam	2	Hospital Sewage, Wastewater Influent
CfxA6	Integrative Element (IGE)	beta-lactam	2	Human Gut, Pig Feces
oqxA	Plasmid	multidrug	2	Hospital Sewage, Wastewater Influent
CfxA3	Integrative Element (IGE)	beta-lactam	2	Human Gut, Pig Feces
tet(40)	Phage,Conjugative Element (CE)	tetracycline	2	Cow Manure, Pig Feces
CMY-62	Plasmid,Conjugative Element (CE)	beta-lactam	2	Hospital Sewage, Wastewater Influent
CMY-55	Plasmid	beta-lactam	2	Hospital Sewage, Wastewater Influent
tet44	Plasmid	tetracycline	2	Chicken Feces, Pig Feces
tet36	Integrative Element (IGE),Conjugative Element (CE)	tetracycline	2	Chicken Feces, Human Gut
vatE	Plasmid	MLS	2	Chicken Feces, Pig Feces
ermC	Plasmid	MLS	2	Chicken Feces, Pig Feces
aadB	Plasmid	aminoglycoside	2	Chicken Feces, Hospital Sewage
CMY-99	Plasmid	beta-lactam	2	Hospital Sewage, Wastewater Influent
dfrA23	Plasmid	diaminopyrimidine	2	Wastewater Influent, Surface Water
NPS-1	Plasmid	beta-lactam	2	Hospital Sewage, Wastewater Influent
LCR-1	Plasmid	beta-lactam	2	Hospital Sewage, Wastewater Influent
sul2	Integrative Element (IGE)	sulfonamide	2	Hospital Sewage, Wastewater Influent
qacH	Phage	fluoroquinolone	2	Wastewater Effluent, Hospital Sewage
ermG	Plasmid	MLS	2	Chicken Feces, Pig Feces
mef(B)	Phage	MLS	2	Wastewater Influent, Surface Water
ampC	Phage	beta-lactam	2	Hospital Sewage, Migratory Bird Droppings
ugd	Plasmid,Conjugative Element (CE)	peptide	2	Chicken Feces, Wastewater Effluent
OpmH	Phage	triclosan	2	Wastewater Effluent, Hospital Sewage
ampC	Plasmid,Conjugative Element (CE)	beta-lactam	2	Hospital Sewage, Wastewater Influent
erm(33)	Plasmid	MLS	2	Chicken Feces, Pig Feces
tetS	Plasmid	tetracycline	2	Wastewater Influent, Surface Water
vatB	Plasmid	MLS	2	Chicken Feces, Pig Feces
abeS	Integrative Element (IGE)	multidrug	2	Chicken Feces, Hospital Sewage
CfxA6	Plasmid	beta-lactam	2	Chicken Feces, Pig Feces
CMY-69	Plasmid	beta-lactam	2	Hospital Sewage, Wastewater Influent
dfrA19	Plasmid	diaminopyrimidine	2	Wastewater Influent, Surface Water
CfxA3	Plasmid	beta-lactam	2	Chicken Feces, Pig Feces
CfxA2	Plasmid	beta-lactam	2	Chicken Feces, Pig Feces
tetQ	Integrative Element (IGE),Conjugative Element (CE)	tetracycline	2	Chicken Feces, Human Gut
vanS	Plasmid,Conjugative Element (CE)	glycopeptide	2	Hospital Sewage, Soil
OXA-334	Plasmid	beta-lactam	2	Hospital Sewage, Wastewater Influent
GES-1	Plasmid	beta-lactam	2	Hospital Sewage, Wastewater Influent
sul1	Plasmid,Conjugative Element (CE)	sulfonamide	2	Wastewater Effluent, Hospital Sewage
efrA	Phage	multidrug	2	Hospital Sewage, Wastewater Influent
MexV	Phage,Conjugative Element (CE)	multidrug	2	Wastewater Effluent, Migratory Bird Droppings
ermC	Integrative Element (IGE),Conjugative Element (CE)	MLS	2	Chicken Feces, Pig Feces
CMY-111	Plasmid	beta-lactam	2	Hospital Sewage, Wastewater Influent
penA	Plasmid	beta-lactam	2	Hospital Sewage, Wastewater Influent
SAT-2	Plasmid	nucleoside	2	Chicken Feces, Hospital Sewage
aadA	Phage	aminoglycoside	2	Hospital Sewage, Wastewater Influent
ADC-20	Plasmid,Conjugative Element (CE)	beta-lactam	2	Wastewater Effluent, Hospital Sewage
CMY-16	Plasmid	beta-lactam	2	Hospital Sewage, Wastewater Influent
bacA	Phage,Plasmid	bacitracin	2	Chicken Feces, Migratory Bird Droppings
OXA-368	Plasmid	beta-lactam	2	Hospital Sewage, Wastewater Influent
OXA-4	Plasmid	beta-lactam	2	Hospital Sewage, Wastewater Influent
ermF	Plasmid,Conjugative Element (CE)	MLS	2	Chicken Feces, Migratory Bird Droppings
erm(35)	Plasmid,Conjugative Element (CE)	MLS	2	Chicken Feces, Migratory Bird Droppings
mtrA	Phage,Conjugative Element (CE)	multidrug	2	Wastewater Effluent, Surface Water
marR	Phage	multidrug	2	Wastewater Effluent, Wastewater Influent
Klebsiella_pneumoniae_OmpK36	Plasmid,Conjugative Element (CE)	beta-lactam	2	Chicken Feces, Migratory Bird Droppings
lmrD	Phage	MLS	2	Hospital Sewage, Wastewater Influent
omp36	Plasmid,Conjugative Element (CE)	multidrug	2	Chicken Feces, Migratory Bird Droppings
porin_OmpC	Plasmid,Conjugative Element (CE)	beta-lactam	2	Chicken Feces, Migratory Bird Droppings
vanRI	Integrative Element (IGE)	glycopeptide	2	Chicken Feces, Human Gut
LlmA_23S_ribosomal_RNA_methyltransferase	Phage,Conjugative Element (CE)	MLS	2	Chicken Feces, Pig Feces
OXA-7	Plasmid	beta-lactam	2	Hospital Sewage, Wastewater Influent
vanR	Integrative Element (IGE)	glycopeptide	2	Chicken Feces, Human Gut
ermF	Phage	MLS	2	Chicken Feces, Human Gut
OXA-47	Plasmid	beta-lactam	2	Hospital Sewage, Wastewater Influent
erm(35)	Phage	MLS	2	Chicken Feces, Human Gut
OXA-1	Plasmid	beta-lactam	2	Hospital Sewage, Wastewater Influent
aadA25	Phage	aminoglycoside	2	Hospital Sewage, Wastewater Influent
IBC-2	Plasmid	beta-lactam	2	Hospital Sewage, Wastewater Influent
GES-19	Plasmid	beta-lactam	2	Hospital Sewage, Wastewater Influent
OXA-212	Plasmid	beta-lactam	2	Hospital Sewage, Wastewater Influent
OXA-309	Plasmid	beta-lactam	2	Hospital Sewage, Wastewater Influent
GES-18	Plasmid	beta-lactam	2	Hospital Sewage, Wastewater Influent
OXA-333	Plasmid	beta-lactam	2	Hospital Sewage, Wastewater Influent
GES-17	Plasmid	beta-lactam	2	Hospital Sewage, Wastewater Influent
marA	Plasmid	multidrug	2	Chicken Feces, Human Gut
OXA-361	Plasmid	beta-lactam	2	Hospital Sewage, Wastewater Influent
CMY-21	Plasmid	beta-lactam	2	Hospital Sewage, Wastewater Influent
GES-16	Plasmid	beta-lactam	2	Hospital Sewage, Wastewater Influent
OXA-362	Plasmid	beta-lactam	2	Hospital Sewage, Wastewater Influent
OXA-363	Plasmid	beta-lactam	2	Hospital Sewage, Wastewater Influent
efrA	Plasmid	multidrug	2	Hospital Sewage, Wastewater Influent
GES-15	Plasmid	beta-lactam	2	Hospital Sewage, Wastewater Influent
GES-14	Plasmid	beta-lactam	2	Hospital Sewage, Wastewater Influent
GES-13	Plasmid	beta-lactam	2	Hospital Sewage, Wastewater Influent
VEB-1	Plasmid	beta-lactam	2	Activated Sludge, Hospital Sewage
GES-12	Plasmid	beta-lactam	2	Hospital Sewage, Wastewater Influent
OXA-228	Plasmid	beta-lactam	2	Hospital Sewage, Wastewater Influent
CMY-31	Plasmid	beta-lactam	2	Hospital Sewage, Wastewater Influent
GES-11	Plasmid	beta-lactam	2	Hospital Sewage, Wastewater Influent
OXA-211	Plasmid	beta-lactam	2	Hospital Sewage, Wastewater Influent
cat_chloramphenicol_acetyltransferase	Integrative Element (IGE)	phenicol	2	Chicken Feces, Hospital Sewage
GES-9	Plasmid	beta-lactam	2	Hospital Sewage, Wastewater Influent
OXA-134	Plasmid	beta-lactam	2	Hospital Sewage, Wastewater Influent
CTX-M	Plasmid	beta-lactam	2	Chicken Feces, Hospital Sewage
GES-5	Plasmid	beta-lactam	2	Hospital Sewage, Wastewater Influent
GES-4	Plasmid	beta-lactam	2	Hospital Sewage, Wastewater Influent
aph(3''')-III	Plasmid	aminoglycoside	2	Chicken Feces, Hospital Sewage
GES-3	Plasmid	beta-lactam	2	Hospital Sewage, Wastewater Influent
abeM	Phage	multidrug	2	Hospital Sewage, Wastewater Influent
GES-24	Plasmid	beta-lactam	2	Hospital Sewage, Wastewater Influent
aph(3')-I	Plasmid,Conjugative Element (CE)	aminoglycoside	2	Hospital Sewage, Wastewater Influent
GES-23	Plasmid	beta-lactam	2	Hospital Sewage, Wastewater Influent
GES-22	Plasmid	beta-lactam	2	Hospital Sewage, Wastewater Influent
mexB	Plasmid	multidrug	2	Hospital Sewage, Migratory Bird Droppings
GES-21	Plasmid	beta-lactam	2	Hospital Sewage, Wastewater Influent
MdtK	Phage	fluoroquinolone	2	Chicken Feces, Hospital Sewage
GES-20	Plasmid	beta-lactam	2	Hospital Sewage, Wastewater Influent
CMY-2	Plasmid	beta-lactam	2	Hospital Sewage, Wastewater Influent
catD	Integrative Element (IGE)	phenicol	2	Chicken Feces, Hospital Sewage
mexD	Plasmid,Conjugative Element (CE)	multidrug	2	Wastewater Effluent, Hospital Sewage
CMY-56	Plasmid,Conjugative Element (CE)	beta-lactam	2	Hospital Sewage, Wastewater Influent
OXA-226	Phage	beta-lactam	2	Activated Sludge, Hospital Sewage
bifunctional_aminoglycoside_N-acetyltransferase_and_aminoglycoside_phosphotransferase	Phage	aminoglycoside	2	Chicken Feces, Pig Feces
CMY-69	Phage,Plasmid	beta-lactam	2	Hospital Sewage, Wastewater Influent
tetO	Plasmid	tetracycline	2	Human Gut, Pig Feces
CMY-62	Phage,Plasmid	beta-lactam	2	Hospital Sewage, Wastewater Influent
CMY-6	Phage,Plasmid	beta-lactam	2	Hospital Sewage, Wastewater Influent
vatB	Integrative Element (IGE),Conjugative Element (CE)	MLS	2	Chicken Feces, Cow Manure
CMY-56	Phage,Plasmid	beta-lactam	2	Hospital Sewage, Wastewater Influent
CMY-55	Phage,Plasmid	beta-lactam	2	Hospital Sewage, Wastewater Influent
CMY-4	Phage,Plasmid	beta-lactam	2	Hospital Sewage, Wastewater Influent
CMY-99	Phage,Plasmid	beta-lactam	2	Hospital Sewage, Wastewater Influent
sul2	Phage	sulfonamide	2	Activated Sludge, Hospital Sewage
bacA	Integrative Element (IGE)	bacitracin	2	Chicken Feces, Pig Feces
CMY-31	Phage,Plasmid	beta-lactam	2	Hospital Sewage, Wastewater Influent
sul2	Integrative Element (IGE),Phage	sulfonamide	2	Activated Sludge, Hospital Sewage
CMY-21	Phage,Plasmid	beta-lactam	2	Hospital Sewage, Wastewater Influent
mdtH	Plasmid	multidrug	2	Chicken Feces, Human Gut
CMY-2	Phage,Plasmid	beta-lactam	2	Hospital Sewage, Wastewater Influent
OXA-3	Phage	beta-lactam	2	Activated Sludge, Hospital Sewage
chloramphenicol_and_florfenicol_resistance	Plasmid,Conjugative Element (CE)	phenicol	2	Chicken Feces, Pig Feces
QnrS8	Phage,Plasmid	fluoroquinolone	2	Hospital Sewage, Wastewater Influent
lsa	Integrative Element (IGE),Conjugative Element (CE)	MLS	2	Chicken Feces, Pig Feces
qnrS	Phage,Plasmid	fluoroquinolone	2	Hospital Sewage, Wastewater Influent
ampC	Phage,Plasmid	beta-lactam	2	Hospital Sewage, Wastewater Influent
ADP-ribosylating_transferase_arr	Plasmid	rifamycin	2	Chicken Feces, Wastewater Effluent
QnrS9	Phage,Plasmid	fluoroquinolone	2	Hospital Sewage, Wastewater Influent
rpoB2	Plasmid	multidrug	2	Wastewater Effluent, Pig Feces
OXA-119	Phage	beta-lactam	2	Activated Sludge, Hospital Sewage
QnrS7	Phage,Plasmid	fluoroquinolone	2	Hospital Sewage, Wastewater Influent
vanR	Phage,Conjugative Element (CE)	glycopeptide	2	Chicken Feces, Human Gut
OXA-141	Phage	beta-lactam	2	Activated Sludge, Hospital Sewage
QnrS6	Phage,Plasmid	fluoroquinolone	2	Hospital Sewage, Wastewater Influent
QnrS5	Phage,Plasmid	fluoroquinolone	2	Hospital Sewage, Wastewater Influent
OXA-37	Plasmid	beta-lactam	2	Wastewater Effluent, Hospital Sewage
QnrS3	Phage,Plasmid	fluoroquinolone	2	Hospital Sewage, Wastewater Influent
CMY-16	Phage,Plasmid	beta-lactam	2	Hospital Sewage, Wastewater Influent
APH(2'')-If	Plasmid	aminoglycoside	2	Hospital Sewage, Wastewater Influent
aac(6')-I	Phage	aminoglycoside	2	Chicken Feces, Pig Feces
CfxA6	Integrative Element (IGE),Conjugative Element (CE)	beta-lactam	2	Cow Manure, Pig Feces
OXA-53	Phage	beta-lactam	2	Activated Sludge, Hospital Sewage
OXA-415	Phage	beta-lactam	2	Activated Sludge, Hospital Sewage
sul1	Phage	sulfonamide	2	Activated Sludge, Wastewater Influent
lnuD	Insertion Sequence (IS)	MLS	2	Chicken Feces, Pig Feces
vatE	Phage,Conjugative Element (CE)	MLS	2	Wastewater Influent, Surface Water
CfxA3	Integrative Element (IGE),Conjugative Element (CE)	beta-lactam	2	Cow Manure, Pig Feces
TriC	Phage	triclosan	2	Wastewater Influent, Surface Water
OXA-46	Phage	beta-lactam	2	Activated Sludge, Hospital Sewage
OXA-21	Phage	beta-lactam	2	Activated Sludge, Hospital Sewage
APH(2'')-If	Phage	aminoglycoside	2	Chicken Feces, Pig Feces
mef(B)	Phage,Conjugative Element (CE)	MLS	2	Wastewater Influent, Surface Water
CfxA2	Integrative Element (IGE),Conjugative Element (CE)	beta-lactam	2	Cow Manure, Pig Feces
AAC(6')-Ie-APH(2'')-Ia	Phage	aminoglycoside	2	Chicken Feces, Pig Feces
emrR	Plasmid	fluoroquinolone	2	Chicken Feces, Migratory Bird Droppings
CMY-111	Phage,Plasmid	beta-lactam	2	Hospital Sewage, Wastewater Influent
OXA-2	Phage	beta-lactam	2	Activated Sludge, Hospital Sewage
OXA-32	Phage	beta-lactam	2	Activated Sludge, Hospital Sewage
cfrC	Plasmid,Conjugative Element (CE)	phenicol	2	Chicken Feces, Pig Feces
mexF	Plasmid	multidrug	2	Wastewater Effluent, Hospital Sewage
vatG	Phage	MLS	2	Chicken Feces, Pig Feces
MuxB	Phage	multidrug	2	Wastewater Influent, Surface Water
emrA	Plasmid	multidrug	2	Chicken Feces, Migratory Bird Droppings
tetW	Plasmid	tetracycline	2	Chicken Feces, Pig Feces
tet(W/N/W)	Plasmid	tetracycline	2	Chicken Feces, Pig Feces
tet32	Phage,Conjugative Element (CE)	tetracycline	2	Hospital Sewage, Human Gut
OXA-118	Phage	beta-lactam	2	Activated Sludge, Hospital Sewage
OXA-36	Phage	beta-lactam	2	Activated Sludge, Hospital Sewage
OXA-210	Phage	beta-lactam	2	Activated Sludge, Hospital Sewage
OXA-205	Phage	beta-lactam	2	Activated Sludge, Hospital Sewage
mtrA	Phage	multidrug	2	Wastewater Effluent, Surface Water
CMY-55	Plasmid,Conjugative Element (CE)	beta-lactam	2	Hospital Sewage, Wastewater Influent
CMY-16	Plasmid,Conjugative Element (CE)	beta-lactam	2	Hospital Sewage, Wastewater Influent
AcrS	Phage	multidrug	2	Chicken Feces, Human Gut
CMY-111	Plasmid,Conjugative Element (CE)	beta-lactam	2	Hospital Sewage, Wastewater Influent
OXA-161	Phage	beta-lactam	2	Activated Sludge, Hospital Sewage
CMY-21	Plasmid,Conjugative Element (CE)	beta-lactam	2	Hospital Sewage, Wastewater Influent
vanRI	Phage,Conjugative Element (CE)	glycopeptide	2	Chicken Feces, Human Gut
ampC	Phage,Conjugative Element (CE)	beta-lactam	2	Hospital Sewage, Migratory Bird Droppings
CMY-31	Plasmid,Conjugative Element (CE)	beta-lactam	2	Hospital Sewage, Wastewater Influent
tet40	Phage,Conjugative Element (CE)	tetracycline	2	Cow Manure, Pig Feces
CMY-2	Plasmid,Conjugative Element (CE)	beta-lactam	2	Hospital Sewage, Wastewater Influent
mexN	Plasmid	multidrug	2	Wastewater Effluent, Surface Water
tet(45)	Plasmid	tetracycline	2	Chicken Feces, Pig Feces
OXA-15	Phage	beta-lactam	2	Activated Sludge, Hospital Sewage
qacH	Plasmid,Conjugative Element (CE)	fluoroquinolone	2	Wastewater Effluent, Wastewater Influent
vatF	Phage	MLS	2	Chicken Feces, Migratory Bird Droppings
emrE	Plasmid	multidrug	2	Hospital Sewage, Wastewater Influent
CMY-4	Plasmid,Conjugative Element (CE)	beta-lactam	2	Hospital Sewage, Wastewater Influent
cpxA	Phage	aminoglycoside:aminocoumarin	2	Chicken Feces, Migratory Bird Droppings
transcriptional_regulatory_protein_CpxR_cpxR	Phage	unclassified	2	Chicken Feces, Migratory Bird Droppings
tetL	Plasmid	tetracycline	2	Chicken Feces, Pig Feces
NDM-14	Insertion Sequence (IS)	beta-lactam	1	Hospital Sewage
NDM-8	Insertion Sequence (IS)	beta-lactam	1	Hospital Sewage
NDM-7	Insertion Sequence (IS)	beta-lactam	1	Hospital Sewage
aadE	Integrative Element (IGE)	aminoglycoside	1	Chicken Feces
NDM-10	Insertion Sequence (IS)	beta-lactam	1	Hospital Sewage
class_A	Integrative Element (IGE),Conjugative Element (CE)	beta-lactam	1	Chicken Feces
OXA-74	Insertion Sequence (IS)	beta-lactam	1	Wastewater Effluent
vatC	Plasmid	MLS	1	Chicken Feces
NDM-1	Insertion Sequence (IS)	beta-lactam	1	Hospital Sewage
chloramphenicol_and_florfenicol_resistance	Integrative Element (IGE),Conjugative Element (CE)	phenicol	1	Chicken Feces
vanX	Plasmid	glycopeptide	1	Chicken Feces
vanS	Integrative Element (IGE),Conjugative Element (CE)	glycopeptide	1	Chicken Feces
BRP(MBL)	Insertion Sequence (IS)	glycopeptide	1	Hospital Sewage
RTG-5	Plasmid	beta-lactam	1	Wastewater Influent
efpA	Phage	multidrug	1	Hospital Sewage
vanG	Integrative Element (IGE),Conjugative Element (CE)	glycopeptide	1	Chicken Feces
OXA-20	Phage	beta-lactam	1	Hospital Sewage
cfrC	Integrative Element (IGE),Conjugative Element (CE)	phenicol	1	Chicken Feces
NDM-6	Insertion Sequence (IS)	beta-lactam	1	Hospital Sewage
erm(33)	Integrative Element (IGE),Conjugative Element (CE)	MLS	1	Chicken Feces
NDM-13	Insertion Sequence (IS)	beta-lactam	1	Hospital Sewage
NDM-2	Insertion Sequence (IS)	beta-lactam	1	Hospital Sewage
OXA-85	Plasmid	beta-lactam	1	Wastewater Influent
NDM-3	Insertion Sequence (IS)	beta-lactam	1	Hospital Sewage
vatE	Integrative Element (IGE),Conjugative Element (CE)	MLS	1	Chicken Feces
aph(3'')-I	Plasmid,Conjugative Element (CE)	aminoglycoside	1	Wastewater Influent
porin_OmpC	Phage,Conjugative Element (CE)	beta-lactam	1	Hospital Sewage
Serratia_marcescens_Omp1	Phage,Conjugative Element (CE)	multidrug	1	Hospital Sewage
vatG	Integrative Element (IGE),Conjugative Element (CE)	MLS	1	Chicken Feces
NDM-17	Insertion Sequence (IS)	beta-lactam	1	Hospital Sewage
NDM-9	Insertion Sequence (IS)	beta-lactam	1	Hospital Sewage
lnuA	Plasmid	MLS	1	Chicken Feces
NDM-4	Insertion Sequence (IS)	beta-lactam	1	Hospital Sewage
NDM-12	Insertion Sequence (IS)	beta-lactam	1	Hospital Sewage
Klebsiella_pneumoniae_OmpK37	Phage,Conjugative Element (CE)	beta-lactam	1	Hospital Sewage
lnuE	Plasmid	MLS	1	Chicken Feces
NDM-5	Insertion Sequence (IS)	beta-lactam	1	Hospital Sewage
Erm(43)	Plasmid	MLS	1	Chicken Feces
fosX	Plasmid	fosfomycin	1	Chicken Feces
erm(TR)	Plasmid	MLS	1	Chicken Feces
MOX-9	Phage	beta-lactam	1	Hospital Sewage
mtrC	Phage,Conjugative Element (CE)	multidrug	1	Wastewater Influent
KPC-12	Insertion Sequence (IS)	beta-lactam	1	Hospital Sewage
KPC-13	Insertion Sequence (IS)	beta-lactam	1	Hospital Sewage
APH(3')-IIa	Insertion Sequence (IS)	aminoglycoside	1	Chicken Feces
KPC-14	Insertion Sequence (IS)	beta-lactam	1	Hospital Sewage
bleO	Phage	glycopeptide	1	Chicken Feces
OXA-51	Plasmid	beta-lactam	1	Wastewater Influent
KPC-15	Insertion Sequence (IS)	beta-lactam	1	Hospital Sewage
bleomycin_resistance_protein	Phage	glycopeptide	1	Chicken Feces
tet36	Insertion Sequence (IS)	tetracycline	1	Hospital Sewage
KPC-16	Insertion Sequence (IS)	beta-lactam	1	Hospital Sewage
optrA	Phage	oxazolidinone	1	Chicken Feces
KPC-17	Insertion Sequence (IS)	beta-lactam	1	Hospital Sewage
ugd	Integrative Element (IGE),Conjugative Element (CE)	peptide	1	Chicken Feces
MOX-8	Phage	beta-lactam	1	Hospital Sewage
ugd	Integrative Element (IGE),Phage	peptide	1	Chicken Feces
KPC-19	Insertion Sequence (IS)	beta-lactam	1	Hospital Sewage
KPC-2	Insertion Sequence (IS)	beta-lactam	1	Hospital Sewage
OXA-64	Plasmid	beta-lactam	1	Wastewater Influent
KPC-11	Insertion Sequence (IS)	beta-lactam	1	Hospital Sewage
vatC	Phage	MLS	1	Chicken Feces
KPC-10	Insertion Sequence (IS)	beta-lactam	1	Hospital Sewage
bacA	Integrative Element (IGE),Conjugative Element (CE)	bacitracin	1	Chicken Feces
ermA	Plasmid	MLS	1	Chicken Feces
ADC-13	Plasmid	beta-lactam	1	Wastewater Influent
aadA	Insertion Sequence (IS)	aminoglycoside	1	Hospital Sewage
aph(3')-VII	Integrative Element (IGE)	aminoglycoside	1	Chicken Feces
rphB	Phage,Conjugative Element (CE)	rifamycin	1	Cow Manure
aph(3')-VII	Phage	aminoglycoside	1	Chicken Feces
aadA13	Insertion Sequence (IS)	aminoglycoside	1	Hospital Sewage
rosB	Phage,Conjugative Element (CE)	fosmidomycin	1	Hospital Sewage
rosA	Integrative Element (IGE),Phage	fosmidomycin	1	Chicken Feces
aadA25	Insertion Sequence (IS)	aminoglycoside	1	Hospital Sewage
qacH	Insertion Sequence (IS)	fluoroquinolone	1	Hospital Sewage
ermF	Integrative Element (IGE),Conjugative Element (CE)	MLS	1	Chicken Feces
KPC-1	Insertion Sequence (IS)	beta-lactam	1	Hospital Sewage
erm(35)	Integrative Element (IGE),Conjugative Element (CE)	MLS	1	Chicken Feces
vatA	Phage	MLS	1	Chicken Feces
aph(6)-I	Insertion Sequence (IS)	aminoglycoside	1	Chicken Feces
vanS	Integrative Element (IGE)	glycopeptide	1	Chicken Feces
tetE	Phage	tetracycline	1	Hospital Sewage
RTG-4	Plasmid	beta-lactam	1	Wastewater Influent
ermT	Plasmid,Conjugative Element (CE)	MLS	1	Chicken Feces
aadD	Plasmid,Conjugative Element (CE)	aminoglycoside	1	Chicken Feces
Klebsiella_pneumoniae_OmpK35	Phage	beta-lactam	1	Hospital Sewage
bleO	Plasmid,Conjugative Element (CE)	glycopeptide	1	Chicken Feces
bleomycin_resistance_protein	Plasmid,Conjugative Element (CE)	glycopeptide	1	Chicken Feces
erm(33)	Plasmid,Conjugative Element (CE)	MLS	1	Chicken Feces
ermA	Plasmid,Conjugative Element (CE)	MLS	1	Chicken Feces
ADC-23	Plasmid	beta-lactam	1	Wastewater Influent
ermC	Plasmid,Conjugative Element (CE)	MLS	1	Chicken Feces
ermG	Plasmid,Conjugative Element (CE)	MLS	1	Chicken Feces
ant(3'')-Ih-aac(6')-IId	Phage	aminoglycoside	1	Hospital Sewage
lnuA	Plasmid,Conjugative Element (CE)	MLS	1	Chicken Feces
evgS	Plasmid	multidrug	1	Chicken Feces
acrB	Insertion Sequence (IS)	multidrug	1	Chicken Feces
ADC-22	Plasmid	beta-lactam	1	Wastewater Influent
lnuE	Plasmid,Conjugative Element (CE)	MLS	1	Chicken Feces
optrA	Plasmid,Conjugative Element (CE)	oxazolidinone	1	Chicken Feces
chloramphenicol_and_florfenicol_resistance	Insertion Sequence (IS)	phenicol	1	Chicken Feces
BRP(MBL)	Phage	glycopeptide	1	Hospital Sewage
vatF	Plasmid	MLS	1	Chicken Feces
FosA	Phage	fosfomycin	1	Hospital Sewage
NDM-1	Phage	beta-lactam	1	Hospital Sewage
mtrC	Plasmid	multidrug	1	Wastewater Influent
OXA-390	Phage,Conjugative Element (CE)	beta-lactam	1	Wastewater Influent
acrD	Insertion Sequence (IS)	aminoglycoside	1	Chicken Feces
mtrD	Plasmid	multidrug	1	Wastewater Influent
aph(2'')-Ie	Plasmid	aminoglycoside	1	Chicken Feces
mexD	Phage	multidrug	1	Hospital Sewage
ADC-5	Plasmid	beta-lactam	1	Wastewater Influent
ADC-6	Plasmid	beta-lactam	1	Wastewater Influent
patA	Insertion Sequence (IS)	fluoroquinolone	1	Chicken Feces
ADC-7	Plasmid	beta-lactam	1	Wastewater Influent
ADC-75	Plasmid	beta-lactam	1	Wastewater Influent
ADC-39	Plasmid	beta-lactam	1	Wastewater Influent
chloramphenicol_exporter	Phage	phenicol	1	Hospital Sewage
aac(3)-II	Insertion Sequence (IS)	aminoglycoside	1	Chicken Feces
ADC-77	Plasmid	beta-lactam	1	Wastewater Influent
ADC-79	Plasmid	beta-lactam	1	Wastewater Influent
emrY	Plasmid	tetracycline	1	Chicken Feces
Acinetobacter_baumannii_ampC_beta-lactamase	Plasmid	beta-lactam	1	Wastewater Influent
MdtK	Plasmid,Conjugative Element (CE)	fluoroquinolone	1	Chicken Feces
rpoB2	Plasmid,Conjugative Element (CE)	multidrug	1	Chicken Feces
OXA-56	Insertion Sequence (IS)	beta-lactam	1	Wastewater Effluent
ADC-3	Plasmid	beta-lactam	1	Wastewater Influent
patB	Plasmid	fluoroquinolone	1	Wastewater Influent
farB	Plasmid	antibacterial_free_fatty_acids	1	Wastewater Influent
TolC	Plasmid,Conjugative Element (CE)	multidrug	1	Wastewater Influent
emrK	Plasmid	multidrug	1	Chicken Feces
ADC-25	Plasmid	beta-lactam	1	Wastewater Influent
NDM-10	Phage	beta-lactam	1	Hospital Sewage
NDM-12	Phage	beta-lactam	1	Hospital Sewage
ADC-44	Plasmid	beta-lactam	1	Wastewater Influent
mexD	Integrative Element (IGE),Conjugative Element (CE)	multidrug	1	Hospital Sewage
ADC-19	Plasmid	beta-lactam	1	Wastewater Influent
mtrE	Plasmid,Conjugative Element (CE)	multidrug	1	Wastewater Influent
catP	Plasmid	phenicol	1	Chicken Feces
mexW	Phage	multidrug	1	Hospital Sewage
catS	Plasmid	phenicol	1	Chicken Feces
kasugamycin_resistance_protein_ksgA	Integrative Element (IGE)	aminoglycoside	1	Hospital Sewage
catD	Insertion Sequence (IS)	phenicol	1	Chicken Feces
adeB	Integrative Element (IGE),Conjugative Element (CE)	multidrug	1	Hospital Sewage
aph(2'')-IV	Plasmid	aminoglycoside	1	Chicken Feces
ADC-17	Plasmid	beta-lactam	1	Wastewater Influent
emrE	Integrative Element (IGE),Conjugative Element (CE)	multidrug	1	Chicken Feces
ant(9)-I	Plasmid	aminoglycoside	1	Chicken Feces
oprJ	Integrative Element (IGE),Conjugative Element (CE)	multidrug	1	Hospital Sewage
ADC-15	Plasmid	beta-lactam	1	Wastewater Influent
abeS	Integrative Element (IGE),Conjugative Element (CE)	multidrug	1	Chicken Feces
tetG	Plasmid	tetracycline	1	Wastewater Influent
vanB	Integrative Element (IGE),Conjugative Element (CE)	glycopeptide	1	Hospital Sewage
tetY	Plasmid	tetracycline	1	Wastewater Influent
ADC-14	Plasmid	beta-lactam	1	Wastewater Influent
CARB-16	Plasmid	beta-lactam	1	Wastewater Influent
CARB-5	Plasmid	beta-lactam	1	Wastewater Influent
CARB-8	Plasmid	beta-lactam	1	Wastewater Influent
NDM-9	Phage	beta-lactam	1	Hospital Sewage
mtrD	Plasmid,Conjugative Element (CE)	multidrug	1	Wastewater Influent
ADC-21	Plasmid	beta-lactam	1	Wastewater Influent
NDM-4	Phage	beta-lactam	1	Hospital Sewage
mtrE	Plasmid	multidrug	1	Wastewater Influent
NDM-13	Phage	beta-lactam	1	Hospital Sewage
cfrC	Insertion Sequence (IS)	phenicol	1	Chicken Feces
mexT	Plasmid	multidrug	1	Wastewater Influent
NDM-14	Phage	beta-lactam	1	Hospital Sewage
APH(3')-VI	Plasmid	aminoglycoside	1	Wastewater Influent
NDM-17	Phage	beta-lactam	1	Hospital Sewage
NDM-2	Phage	beta-lactam	1	Hospital Sewage
cat_chloramphenicol_acetyltransferase	Insertion Sequence (IS)	phenicol	1	Chicken Feces
NDM-8	Phage	beta-lactam	1	Hospital Sewage
NDM-5	Phage	beta-lactam	1	Hospital Sewage
ADC-2	Plasmid	beta-lactam	1	Wastewater Influent
NDM-6	Phage	beta-lactam	1	Hospital Sewage
tet32	Plasmid	tetracycline	1	Pig Feces
OXA-37	Phage	beta-lactam	1	Hospital Sewage
catS	Insertion Sequence (IS)	phenicol	1	Chicken Feces
mdtM	Plasmid	multidrug	1	Chicken Feces
NDM-7	Phage	beta-lactam	1	Hospital Sewage
mtrC	Plasmid,Conjugative Element (CE)	multidrug	1	Wastewater Influent
aad(9)	Plasmid	aminoglycoside	1	Chicken Feces
NDM-3	Phage	beta-lactam	1	Hospital Sewage
KPC-4	Plasmid	beta-lactam	1	Hospital Sewage
KPC-22	Insertion Sequence (IS)	beta-lactam	1	Hospital Sewage
PER-7	Plasmid	beta-lactam	1	Hospital Sewage
OXA-209	Insertion Sequence (IS)	beta-lactam	1	Hospital Sewage
OXA-347	Insertion Sequence (IS)	beta-lactam	1	Hospital Sewage
tetX	Insertion Sequence (IS)	tetracycline	1	Hospital Sewage
CMY-1	Insertion Sequence (IS)	beta-lactam	1	Hospital Sewage
CMY-10	Insertion Sequence (IS)	beta-lactam	1	Hospital Sewage
CMY-11	Insertion Sequence (IS)	beta-lactam	1	Hospital Sewage
CMY-19	Insertion Sequence (IS)	beta-lactam	1	Hospital Sewage
CMY-9	Insertion Sequence (IS)	beta-lactam	1	Hospital Sewage
MOX-1	Insertion Sequence (IS)	beta-lactam	1	Hospital Sewage
MOX-2	Insertion Sequence (IS)	beta-lactam	1	Hospital Sewage
MOX-3	Insertion Sequence (IS)	beta-lactam	1	Hospital Sewage
MOX-4	Insertion Sequence (IS)	beta-lactam	1	Hospital Sewage
MOX-5	Insertion Sequence (IS)	beta-lactam	1	Hospital Sewage
MOX-6	Insertion Sequence (IS)	beta-lactam	1	Hospital Sewage
MOX-7	Insertion Sequence (IS)	beta-lactam	1	Hospital Sewage
MOX-8	Insertion Sequence (IS)	beta-lactam	1	Hospital Sewage
ampC	Insertion Sequence (IS)	beta-lactam	1	Hospital Sewage
class_C	Insertion Sequence (IS)	beta-lactam	1	Hospital Sewage
PER-6	Plasmid	beta-lactam	1	Hospital Sewage
PER-5	Plasmid	beta-lactam	1	Hospital Sewage
PER-4	Plasmid	beta-lactam	1	Hospital Sewage
CMY-11	Plasmid	beta-lactam	1	Hospital Sewage
OXA-316	Plasmid,Conjugative Element (CE)	beta-lactam	1	Hospital Sewage
OXA-67	Plasmid,Conjugative Element (CE)	beta-lactam	1	Hospital Sewage
OXA-72	Plasmid,Conjugative Element (CE)	beta-lactam	1	Hospital Sewage
OXA-87	Plasmid,Conjugative Element (CE)	beta-lactam	1	Hospital Sewage
OXA-94	Plasmid,Conjugative Element (CE)	beta-lactam	1	Hospital Sewage
efrA	Phage,Plasmid	multidrug	1	Hospital Sewage
efrB	Phage,Plasmid	multidrug	1	Hospital Sewage
tetU	Plasmid	tetracycline	1	Hospital Sewage
adeB	Plasmid	multidrug	1	Hospital Sewage
CMY-1	Plasmid	beta-lactam	1	Hospital Sewage
CMY-10	Plasmid	beta-lactam	1	Hospital Sewage
CMY-19	Plasmid	beta-lactam	1	Hospital Sewage
PER-3	Plasmid	beta-lactam	1	Hospital Sewage
CMY-9	Plasmid	beta-lactam	1	Hospital Sewage
MOX-1	Plasmid	beta-lactam	1	Hospital Sewage
MOX-2	Plasmid	beta-lactam	1	Hospital Sewage
MOX-3	Plasmid	beta-lactam	1	Hospital Sewage
MOX-4	Plasmid	beta-lactam	1	Hospital Sewage
MOX-5	Plasmid	beta-lactam	1	Hospital Sewage
MOX-6	Plasmid	beta-lactam	1	Hospital Sewage
MOX-7	Plasmid	beta-lactam	1	Hospital Sewage
MOX-8	Plasmid	beta-lactam	1	Hospital Sewage
PER-1	Plasmid	beta-lactam	1	Hospital Sewage
PER-2	Plasmid	beta-lactam	1	Hospital Sewage
OXA-26	Plasmid,Conjugative Element (CE)	beta-lactam	1	Hospital Sewage
OXA-315	Plasmid,Conjugative Element (CE)	beta-lactam	1	Hospital Sewage
OXA-255	Plasmid,Conjugative Element (CE)	beta-lactam	1	Hospital Sewage
adeN	Phage	multidrug	1	Wastewater Influent
rosA	Plasmid,Conjugative Element (CE)	fosmidomycin	1	Hospital Sewage
vanA	Plasmid,Conjugative Element (CE)	glycopeptide	1	Hospital Sewage
vanB	Plasmid,Conjugative Element (CE)	glycopeptide	1	Hospital Sewage
vanD	Plasmid,Conjugative Element (CE)	glycopeptide	1	Hospital Sewage
vanH	Plasmid,Conjugative Element (CE)	glycopeptide	1	Hospital Sewage
vanI	Plasmid,Conjugative Element (CE)	glycopeptide	1	Hospital Sewage
vanX	Plasmid,Conjugative Element (CE)	glycopeptide	1	Hospital Sewage
vanXI	Plasmid,Conjugative Element (CE)	glycopeptide	1	Hospital Sewage
vanVB	Phage	glycopeptide	1	Chicken Feces
catB10	Plasmid	phenicol	1	Hospital Sewage
ermA	Insertion Sequence (IS)	MLS	1	Pig Feces
mtrD	Phage,Conjugative Element (CE)	multidrug	1	Wastewater Influent
TEM-1	Insertion Sequence (IS)	beta-lactam	1	Hospital Sewage
KPC-3	Insertion Sequence (IS)	beta-lactam	1	Hospital Sewage
KPC-4	Insertion Sequence (IS)	beta-lactam	1	Hospital Sewage
KPC-5	Insertion Sequence (IS)	beta-lactam	1	Hospital Sewage
rosA	Integrative Element (IGE)	fosmidomycin	1	Chicken Feces
KPC-6	Insertion Sequence (IS)	beta-lactam	1	Hospital Sewage
AAC(6')-Ie-APH(2'')-Ia	Integrative Element (IGE)	aminoglycoside	1	Chicken Feces
KPC-7	Insertion Sequence (IS)	beta-lactam	1	Hospital Sewage
APH(2'')-If	Integrative Element (IGE)	aminoglycoside	1	Chicken Feces
KPC-8	Insertion Sequence (IS)	beta-lactam	1	Hospital Sewage
bifunctional_aminoglycoside_N-acetyltransferase_and_aminoglycoside_phosphotransferase	Integrative Element (IGE)	aminoglycoside	1	Chicken Feces
KPC-9	Insertion Sequence (IS)	beta-lactam	1	Hospital Sewage
OXA-235	Plasmid	beta-lactam	1	Hospital Sewage
OXA-236	Plasmid	beta-lactam	1	Hospital Sewage
OXA-237	Plasmid	beta-lactam	1	Hospital Sewage
OXA-253	Plasmid	beta-lactam	1	Hospital Sewage
OXA-278	Plasmid	beta-lactam	1	Hospital Sewage
OXA-335	Plasmid	beta-lactam	1	Hospital Sewage
OXA-360	Plasmid	beta-lactam	1	Hospital Sewage
ramA	Plasmid	multidrug	1	Hospital Sewage
OXA-253	Plasmid,Conjugative Element (CE)	beta-lactam	1	Hospital Sewage
tap	Plasmid	tetracycline	1	Hospital Sewage
adeI	Plasmid	multidrug	1	Hospital Sewage
adeJ	Plasmid	multidrug	1	Hospital Sewage
Klebsiella_pneumoniae_OmpK35	Plasmid	beta-lactam	1	Hospital Sewage
chloramphenicol_exporter	Plasmid,Conjugative Element (CE)	phenicol	1	Hospital Sewage
floR	Plasmid,Conjugative Element (CE)	phenicol	1	Hospital Sewage
aadB	Plasmid,Conjugative Element (CE)	aminoglycoside	1	Hospital Sewage
ant(2'')-I	Plasmid,Conjugative Element (CE)	aminoglycoside	1	Hospital Sewage
OXA-108	Plasmid,Conjugative Element (CE)	beta-lactam	1	Hospital Sewage
OXA-130	Plasmid,Conjugative Element (CE)	beta-lactam	1	Hospital Sewage
OXA-139	Plasmid,Conjugative Element (CE)	beta-lactam	1	Hospital Sewage
OXA-143	Plasmid,Conjugative Element (CE)	beta-lactam	1	Hospital Sewage
OXA-160	Plasmid,Conjugative Element (CE)	beta-lactam	1	Hospital Sewage
OXA-182	Plasmid,Conjugative Element (CE)	beta-lactam	1	Hospital Sewage
OXA-207	Plasmid,Conjugative Element (CE)	beta-lactam	1	Hospital Sewage
OXA-231	Plasmid,Conjugative Element (CE)	beta-lactam	1	Hospital Sewage
OXA-24	Plasmid,Conjugative Element (CE)	beta-lactam	1	Hospital Sewage
OXA-25	Plasmid,Conjugative Element (CE)	beta-lactam	1	Hospital Sewage
CMY-66	Plasmid	beta-lactam	1	Hospital Sewage
OXA-106	Phage,Conjugative Element (CE)	beta-lactam	1	Wastewater Influent
CMY-110	Plasmid	beta-lactam	1	Hospital Sewage
CMY-112	Plasmid	beta-lactam	1	Hospital Sewage
CMY-116	Plasmid	beta-lactam	1	Hospital Sewage
CMY-117	Plasmid	beta-lactam	1	Hospital Sewage
CMY-118	Plasmid	beta-lactam	1	Hospital Sewage
CMY-48	Plasmid	beta-lactam	1	Hospital Sewage
CMY-51	Plasmid	beta-lactam	1	Hospital Sewage
CMY-75	Plasmid	beta-lactam	1	Hospital Sewage
FosA	Plasmid	fosfomycin	1	Hospital Sewage
CMY-79	Plasmid	beta-lactam	1	Hospital Sewage
CMY-84	Plasmid	beta-lactam	1	Hospital Sewage
golS	Plasmid,Conjugative Element (CE)	multidrug	1	Hospital Sewage
oprJ	Plasmid,Conjugative Element (CE)	multidrug	1	Hospital Sewage
oprM	Plasmid,Conjugative Element (CE)	multidrug	1	Hospital Sewage
mtrE	Phage,Conjugative Element (CE)	multidrug	1	Wastewater Influent
efpA	Plasmid	multidrug	1	Hospital Sewage
kdpE	Integrative Element (IGE)	aminoglycoside	1	Chicken Feces
bacterial_regulatory_protein_LuxR	Phage	unclassified	1	Chicken Feces
MOX-7	Phage	beta-lactam	1	Hospital Sewage
MexB	Plasmid	multidrug	1	Migratory Bird Droppings
OXA-327	Phage,Conjugative Element (CE)	beta-lactam	1	Wastewater Influent
sul3	Plasmid	sulfonamide	1	Chicken Feces
ceoB	Plasmid,Conjugative Element (CE)	multidrug	1	Wastewater Effluent
Bacillus_Cluster_B_intrinsic_mph	Phage	MLS	1	Pig Feces
OXA-142	Insertion Sequence (IS)	beta-lactam	1	Wastewater Effluent
NDM-13	Phage,Conjugative Element (CE)	beta-lactam	1	Hospital Sewage
OXA-328	Phage,Conjugative Element (CE)	beta-lactam	1	Wastewater Influent
mefA	Plasmid,Conjugative Element (CE)	MLS	1	Pig Feces
aac(3)-I	Insertion Sequence (IS)	aminoglycoside	1	Activated Sludge
catQ	Plasmid	phenicol	1	Surface Water
qacG	Integrative Element (IGE)	multidrug	1	Cow Manure
mef(B)	Plasmid	MLS	1	Chicken Feces
mexF	Plasmid,Conjugative Element (CE)	multidrug	1	Wastewater Effluent
mdtG	Phage,Plasmid	multidrug	1	Chicken Feces
OXA-145	Insertion Sequence (IS)	beta-lactam	1	Wastewater Effluent
mefA	Phage,Conjugative Element (CE)	MLS	1	Pig Feces
Escherichia_coli_LamB	Plasmid,Conjugative Element (CE)	multidrug	1	Migratory Bird Droppings
mdtH	Phage,Plasmid	multidrug	1	Chicken Feces
multidrug_ABC_transporter	Plasmid,Conjugative Element (CE)	multidrug	1	Wastewater Effluent
aac(3)-IV	Plasmid	aminoglycoside	1	Chicken Feces
NDM-14	Phage,Conjugative Element (CE)	beta-lactam	1	Hospital Sewage
MexB	Phage	multidrug	1	Migratory Bird Droppings
aph(4)-I	Plasmid	aminoglycoside	1	Chicken Feces
bpeF	Plasmid,Conjugative Element (CE)	multidrug	1	Wastewater Effluent
OXA-359	Phage,Conjugative Element (CE)	beta-lactam	1	Wastewater Influent
ermT	Integrative Element (IGE)	MLS	1	Pig Feces
tetX	Integrative Element (IGE)	tetracycline	1	Pig Feces
dfrA22	Plasmid	diaminopyrimidine	1	Chicken Feces
OXA-129	Insertion Sequence (IS)	beta-lactam	1	Wastewater Effluent
VEB-1b	Plasmid	beta-lactam	1	Activated Sludge
ermC	Integrative Element (IGE)	MLS	1	Pig Feces
class_A	Plasmid,Conjugative Element (CE)	beta-lactam	1	Human Gut
NDM-10	Phage,Conjugative Element (CE)	beta-lactam	1	Hospital Sewage
ermG	Integrative Element (IGE)	MLS	1	Pig Feces
Escherichia_coli_mdfA	Plasmid	multidrug	1	Chicken Feces
OXA-326	Phage,Conjugative Element (CE)	beta-lactam	1	Wastewater Influent
CfxA6	Insertion Sequence (IS)	beta-lactam	1	Pig Feces
catA	Plasmid	phenicol	1	Surface Water
dfrF	Plasmid,Conjugative Element (CE)	diaminopyrimidine	1	Human Gut
CfxA2	Insertion Sequence (IS)	beta-lactam	1	Pig Feces
aac(3)-I	Plasmid	aminoglycoside	1	Activated Sludge
adeF	Plasmid,Conjugative Element (CE)	multidrug	1	Wastewater Effluent
tetP	Phage	tetracycline	1	Pig Feces
OXA-13	Insertion Sequence (IS)	beta-lactam	1	Wastewater Effluent
CfxA3	Insertion Sequence (IS)	beta-lactam	1	Pig Feces
mexA	Phage	multidrug	1	Migratory Bird Droppings
NDM-12	Phage,Conjugative Element (CE)	beta-lactam	1	Hospital Sewage
oprC	Plasmid,Conjugative Element (CE)	multidrug	1	Wastewater Effluent
mel	Integrative Element (IGE)	MLS	1	Hospital Sewage
OXA-329	Phage,Conjugative Element (CE)	beta-lactam	1	Wastewater Influent
OXA-14	Plasmid	beta-lactam	1	Wastewater Influent
CTX-M-28	Plasmid	beta-lactam	1	Hospital Sewage
OXA-129	Plasmid	beta-lactam	1	Wastewater Effluent
CTX-M-55	Plasmid	beta-lactam	1	Hospital Sewage
OXA-233	Insertion Sequence (IS)	beta-lactam	1	Wastewater Effluent
CTX-M-79	Plasmid	beta-lactam	1	Hospital Sewage
QnrB23	Plasmid	fluoroquinolone	1	Migratory Bird Droppings
OXA-5	Plasmid	beta-lactam	1	Wastewater Effluent
CTX-M-82	Plasmid	beta-lactam	1	Hospital Sewage
NDM-5	Phage,Conjugative Element (CE)	beta-lactam	1	Hospital Sewage
QnrB31	Plasmid	fluoroquinolone	1	Migratory Bird Droppings
OXA-350	Phage,Conjugative Element (CE)	beta-lactam	1	Wastewater Influent
OXA-147	Insertion Sequence (IS)	beta-lactam	1	Wastewater Effluent
eptA	Phage,Conjugative Element (CE)	peptide	1	Chicken Feces
QnrB33	Plasmid	fluoroquinolone	1	Migratory Bird Droppings
OXA-240	Insertion Sequence (IS)	beta-lactam	1	Wastewater Effluent
PER-1	Insertion Sequence (IS)	beta-lactam	1	Hospital Sewage
PER-2	Insertion Sequence (IS)	beta-lactam	1	Hospital Sewage
PER-3	Insertion Sequence (IS)	beta-lactam	1	Hospital Sewage
ANT(3'')-IIa	Plasmid	aminoglycoside	1	Wastewater Effluent
PER-4	Insertion Sequence (IS)	beta-lactam	1	Hospital Sewage
ANT(3'')-IIb	Plasmid	aminoglycoside	1	Wastewater Effluent
CTX-M-157	Plasmid	beta-lactam	1	Hospital Sewage
OXA-348	Phage,Conjugative Element (CE)	beta-lactam	1	Wastewater Influent
CTX-M-156	Plasmid	beta-lactam	1	Hospital Sewage
RbpA	Plasmid	rifamycin	1	Wastewater Effluent
CTX-M-101	Plasmid	beta-lactam	1	Hospital Sewage
NDM-17	Phage,Conjugative Element (CE)	beta-lactam	1	Hospital Sewage
vanU	Phage,Conjugative Element (CE)	glycopeptide	1	Human Gut
CTX-M-103	Plasmid	beta-lactam	1	Hospital Sewage
OXA-330	Phage,Conjugative Element (CE)	beta-lactam	1	Wastewater Influent
CMY-115	Phage,Conjugative Element (CE)	beta-lactam	1	Migratory Bird Droppings
CTX-M-114	Plasmid	beta-lactam	1	Hospital Sewage
tetQ	Phage,Plasmid	tetracycline	1	Pig Feces
emrD	Plasmid,Conjugative Element (CE)	multidrug	1	Migratory Bird Droppings
mel	Plasmid	MLS	1	Surface Water
CTX-M-136	Plasmid	beta-lactam	1	Hospital Sewage
OXA-17	Insertion Sequence (IS)	beta-lactam	1	Wastewater Effluent
NDM-2	Phage,Conjugative Element (CE)	beta-lactam	1	Hospital Sewage
OXA-331	Phage,Conjugative Element (CE)	beta-lactam	1	Wastewater Influent
CTX-M-142	Plasmid	beta-lactam	1	Hospital Sewage
OXA-183	Insertion Sequence (IS)	beta-lactam	1	Wastewater Effluent
NDM-3	Phage,Conjugative Element (CE)	beta-lactam	1	Hospital Sewage
CTX-M-15	Plasmid	beta-lactam	1	Hospital Sewage
vanS	Phage,Conjugative Element (CE)	glycopeptide	1	Pig Feces
OXA-332	Phage,Conjugative Element (CE)	beta-lactam	1	Wastewater Influent
CTX-M-155	Plasmid	beta-lactam	1	Hospital Sewage
OXA-19	Insertion Sequence (IS)	beta-lactam	1	Wastewater Effluent
NDM-4	Phage,Conjugative Element (CE)	beta-lactam	1	Hospital Sewage
dfrA21	Plasmid	diaminopyrimidine	1	Chicken Feces
ACT-28	Phage	beta-lactam	1	Migratory Bird Droppings
VEB-8	Plasmid	beta-lactam	1	Activated Sludge
mphD	Phage,Conjugative Element (CE)	MLS	1	Migratory Bird Droppings
KPC-15	Plasmid	beta-lactam	1	Hospital Sewage
QnrS7	Plasmid,Conjugative Element (CE)	fluoroquinolone	1	Wastewater Effluent
KPC-14	Plasmid	beta-lactam	1	Hospital Sewage
QnrS6	Plasmid,Conjugative Element (CE)	fluoroquinolone	1	Wastewater Effluent
ACT-22	Phage,Conjugative Element (CE)	beta-lactam	1	Migratory Bird Droppings
MuxC	Plasmid	multidrug	1	Surface Water
vgaC	Phage	MLS	1	Wastewater Effluent
VEB-7	Plasmid	beta-lactam	1	Activated Sludge
Escherichia_coli_LamB	Phage	multidrug	1	Migratory Bird Droppings
ADP-ribosylating_transferase_arr	Phage	rifamycin	1	Wastewater Effluent
KPC-13	Plasmid	beta-lactam	1	Hospital Sewage
ermB	Plasmid,Conjugative Element (CE)	MLS	1	Pig Feces
QnrS5	Plasmid,Conjugative Element (CE)	fluoroquinolone	1	Wastewater Effluent
QnrS8	Plasmid,Conjugative Element (CE)	fluoroquinolone	1	Wastewater Effluent
KPC-16	Plasmid	beta-lactam	1	Hospital Sewage
KPC-3	Plasmid	beta-lactam	1	Hospital Sewage
KPC-5	Plasmid	beta-lactam	1	Hospital Sewage
mexF	Phage	multidrug	1	Wastewater Effluent
KPC-22	Plasmid	beta-lactam	1	Hospital Sewage
KPC-6	Plasmid	beta-lactam	1	Hospital Sewage
lnuC	Integrative Element (IGE)	MLS	1	Pig Feces
KPC-7	Plasmid	beta-lactam	1	Hospital Sewage
KPC-2	Plasmid	beta-lactam	1	Hospital Sewage
lnuD	Integrative Element (IGE)	MLS	1	Pig Feces
KPC-8	Plasmid	beta-lactam	1	Hospital Sewage
KPC-19	Plasmid	beta-lactam	1	Hospital Sewage
qnrS	Plasmid,Conjugative Element (CE)	fluoroquinolone	1	Wastewater Effluent
KPC-9	Plasmid	beta-lactam	1	Hospital Sewage
Pseudomonas_aeruginosa_emrE	Phage	aminoglycoside	1	Wastewater Effluent
PBP-1A	Insertion Sequence (IS)	beta-lactam	1	Pig Feces
ACT-28	Phage,Conjugative Element (CE)	beta-lactam	1	Migratory Bird Droppings
KPC-17	Plasmid	beta-lactam	1	Hospital Sewage
QnrS9	Plasmid,Conjugative Element (CE)	fluoroquinolone	1	Wastewater Effluent
qacH	Integrative Element (IGE)	fluoroquinolone	1	Wastewater Influent
OXA-208	Phage,Conjugative Element (CE)	beta-lactam	1	Wastewater Influent
dfrA13	Plasmid	diaminopyrimidine	1	Chicken Feces
aadA25	Integrative Element (IGE)	aminoglycoside	1	Chicken Feces
erm(33)	Phage	MLS	1	Pig Feces
BRP(MBL)	Phage,Conjugative Element (CE)	glycopeptide	1	Hospital Sewage
ermC	Phage	MLS	1	Pig Feces
ceoB	Plasmid	multidrug	1	Wastewater Effluent
VEB-4	Plasmid	beta-lactam	1	Activated Sludge
OXA-323	Phage,Conjugative Element (CE)	beta-lactam	1	Wastewater Influent
ermG	Phage	MLS	1	Pig Feces
tetR	Plasmid	tetracycline	1	Activated Sludge
vanS	Phage,Plasmid	glycopeptide	1	Chicken Feces
bpeF	Plasmid	multidrug	1	Wastewater Effluent
ermT	Phage	MLS	1	Pig Feces
OXA-101	Insertion Sequence (IS)	beta-lactam	1	Wastewater Effluent
FosA	Phage,Conjugative Element (CE)	fosfomycin	1	Hospital Sewage
OXA-324	Phage,Conjugative Element (CE)	beta-lactam	1	Wastewater Influent
OXA-11	Insertion Sequence (IS)	beta-lactam	1	Wastewater Effluent
VEB-2	Plasmid	beta-lactam	1	Activated Sludge
NDM-1	Phage,Conjugative Element (CE)	beta-lactam	1	Hospital Sewage
OXA-325	Phage,Conjugative Element (CE)	beta-lactam	1	Wastewater Influent
mphB	Phage	MLS	1	Pig Feces
major_facilitator_superfamily_transporter	Plasmid	multidrug	1	Migratory Bird Droppings
dfrA12	Plasmid	diaminopyrimidine	1	Chicken Feces
ACT-22	Phage	beta-lactam	1	Migratory Bird Droppings
OXA-10	Insertion Sequence (IS)	beta-lactam	1	Wastewater Effluent
VEB-5	Plasmid	beta-lactam	1	Activated Sludge
APH(3')-IIa	Plasmid	aminoglycoside	1	Chicken Feces
oprC	Plasmid	multidrug	1	Wastewater Effluent
KPC-12	Plasmid	beta-lactam	1	Hospital Sewage
QnrS3	Plasmid,Conjugative Element (CE)	fluoroquinolone	1	Wastewater Effluent
LlmA_23S_ribosomal_RNA_methyltransferase	Integrative Element (IGE),Conjugative Element (CE)	MLS	1	Human Gut
KPC-11	Plasmid	beta-lactam	1	Hospital Sewage
vanW	Phage	glycopeptide	1	Human Gut
KPC-10	Plasmid	beta-lactam	1	Hospital Sewage
KPC-1	Plasmid	beta-lactam	1	Hospital Sewage
tetL	Plasmid,Conjugative Element (CE)	tetracycline	1	Chicken Feces
vanVB	Integrative Element (IGE),Conjugative Element (CE)	glycopeptide	1	Human Gut
VEB-6	Plasmid	beta-lactam	1	Activated Sludge
OXA-213	Phage,Conjugative Element (CE)	beta-lactam	1	Wastewater Influent
OXA-322	Phage,Conjugative Element (CE)	beta-lactam	1	Wastewater Influent
vanU	Integrative Element (IGE),Conjugative Element (CE)	glycopeptide	1	Human Gut
truncated_putative_response_regulator_ArlR	Phage,Conjugative Element (CE)	unclassified	1	Migratory Bird Droppings
lnuC	Integrative Element (IGE),Conjugative Element (CE)	MLS	1	Pig Feces
class_A	Integrative Element (IGE)	beta-lactam	1	Human Gut
EmrB-QacA_family_major_facilitator_transporter	Insertion Sequence (IS)	multidrug	1	Pig Feces
PER-5	Insertion Sequence (IS)	beta-lactam	1	Hospital Sewage
ANT(3'')-IIc	Plasmid	aminoglycoside	1	Wastewater Effluent
PER-6	Insertion Sequence (IS)	beta-lactam	1	Hospital Sewage
AcrE	Phage	multidrug	1	Chicken Feces
ermF	Phage,Conjugative Element (CE)	MLS	1	Chicken Feces
KPC-11	Integrative Element (IGE)	beta-lactam	1	Hospital Sewage
tet36	Phage,Conjugative Element (CE)	tetracycline	1	Chicken Feces
tetQ	Phage,Conjugative Element (CE)	tetracycline	1	Chicken Feces
lmrC	Phage	MLS	1	Wastewater Influent
emrE	Phage	multidrug	1	Chicken Feces
patB	Phage	fluoroquinolone	1	Wastewater Influent
tetB(46)	Phage	tetracycline	1	Wastewater Influent
tetB(60)	Phage	tetracycline	1	Wastewater Influent
tetS	Phage	tetracycline	1	Wastewater Influent
mtrC	Phage	multidrug	1	Wastewater Influent
MCR-2	Integrative Element (IGE)	peptide	1	Wastewater Influent
mtrD	Phage	multidrug	1	Wastewater Influent
mtrE	Phage	multidrug	1	Wastewater Influent
CARB-16	Integrative Element (IGE)	beta-lactam	1	Wastewater Influent
CARB-5	Integrative Element (IGE)	beta-lactam	1	Wastewater Influent
catP	Phage	phenicol	1	Chicken Feces
CARB-8	Integrative Element (IGE)	beta-lactam	1	Wastewater Influent
CMY-23	Plasmid,Conjugative Element (CE)	beta-lactam	1	Hospital Sewage
MCR-1	Integrative Element (IGE)	peptide	1	Wastewater Influent
CMY-30	Plasmid,Conjugative Element (CE)	beta-lactam	1	Hospital Sewage
MCR-1	Integrative Element (IGE)	peptide	1	Wastewater Influent
OXA-358	Phage,Conjugative Element (CE)	beta-lactam	1	Wastewater Influent
erm(35)	Phage,Conjugative Element (CE)	MLS	1	Chicken Feces
NPS-1	Phage	beta-lactam	1	Wastewater Influent
OXA-35	Insertion Sequence (IS)	beta-lactam	1	Wastewater Effluent
oqxB	Phage	multidrug	1	Wastewater Influent
oprM	Phage,Plasmid	multidrug	1	Wastewater Influent
KPC-16	Integrative Element (IGE)	beta-lactam	1	Hospital Sewage
KPC-15	Integrative Element (IGE)	beta-lactam	1	Hospital Sewage
aadD	Phage	aminoglycoside	1	Chicken Feces
OXA-357	Phage,Conjugative Element (CE)	beta-lactam	1	Wastewater Influent
cAMP-regulatory_protein	Phage,Conjugative Element (CE)	unclassified	1	Sediment
catS	Phage	phenicol	1	Chicken Feces
KPC-14	Integrative Element (IGE)	beta-lactam	1	Hospital Sewage
OXA-454	Insertion Sequence (IS)	beta-lactam	1	Wastewater Effluent
KPC-13	Integrative Element (IGE)	beta-lactam	1	Hospital Sewage
LCR-1	Phage	beta-lactam	1	Wastewater Influent
TriC	Plasmid	triclosan	1	Wastewater Influent
KPC-12	Integrative Element (IGE)	beta-lactam	1	Hospital Sewage
CMY-54	Plasmid,Conjugative Element (CE)	beta-lactam	1	Hospital Sewage
CMY-60	Plasmid,Conjugative Element (CE)	beta-lactam	1	Hospital Sewage
clbC	Phage	phenicol	1	Chicken Feces
cfrC	Integrative Element (IGE)	phenicol	1	Chicken Feces
rosA	Integrative Element (IGE),Phage,Conjugative Element (CE)	fosmidomycin	1	Chicken Feces
CMY-1	Phage	beta-lactam	1	Hospital Sewage
TEM-47	Plasmid	beta-lactam	1	Wastewater Influent
16S_rRNA_methylase	Integrative Element (IGE)	unclassified	1	Chicken Feces
CMY-10	Phage	beta-lactam	1	Hospital Sewage
TEM-70	Plasmid	beta-lactam	1	Wastewater Influent
CMY-11	Phage	beta-lactam	1	Hospital Sewage
OXA-132	Plasmid	beta-lactam	1	Wastewater Influent
CMY-19	Phage	beta-lactam	1	Hospital Sewage
KPC-10	Integrative Element (IGE)	beta-lactam	1	Hospital Sewage
CMY-9	Phage	beta-lactam	1	Hospital Sewage
MOX-1	Phage	beta-lactam	1	Hospital Sewage
RTG-4	Integrative Element (IGE)	beta-lactam	1	Wastewater Influent
chloramphenicol_and_florfenicol_resistance	Integrative Element (IGE)	phenicol	1	Chicken Feces
MOX-2	Phage	beta-lactam	1	Hospital Sewage
OXA-5	Insertion Sequence (IS)	beta-lactam	1	Wastewater Effluent
MOX-3	Phage	beta-lactam	1	Hospital Sewage
ompF	Integrative Element (IGE)	multidrug	1	Chicken Feces
MOX-4	Phage	beta-lactam	1	Hospital Sewage
KPC-1	Integrative Element (IGE)	beta-lactam	1	Hospital Sewage
tet34	Integrative Element (IGE)	tetracycline	1	Chicken Feces
MOX-5	Phage	beta-lactam	1	Hospital Sewage
OXA-338	Plasmid	beta-lactam	1	Wastewater Influent
MOX-6	Phage	beta-lactam	1	Hospital Sewage
TEM-19	Plasmid	beta-lactam	1	Wastewater Influent
AQU-1	Phage	beta-lactam	1	Hospital Sewage
evgS	Phage	multidrug	1	Chicken Feces
TEM-183	Plasmid	beta-lactam	1	Wastewater Influent
mefA	Phage,Plasmid	MLS	1	Chicken Feces
class_C	Plasmid,Conjugative Element (CE)	beta-lactam	1	Hospital Sewage
RTG-5	Integrative Element (IGE)	beta-lactam	1	Wastewater Influent
16S_rRNA_methylase	Phage	unclassified	1	Chicken Feces
cfrC	Phage	phenicol	1	Chicken Feces
chloramphenicol_and_florfenicol_resistance	Phage	phenicol	1	Chicken Feces
adeB	Phage	multidrug	1	Hospital Sewage
mdtM	Phage	multidrug	1	Chicken Feces
aac(3)-VI	Phage	aminoglycoside	1	Chicken Feces
streptomycin_resistance_protein	Phage	aminoglycoside	1	Chicken Feces
PmrF	Phage	peptide	1	Chicken Feces
catB	Phage	phenicol	1	Chicken Feces
tetA	Insertion Sequence (IS)	tetracycline	1	Wastewater Influent
arnA	Phage	polymyxin	1	Chicken Feces
streptomycin_resistance_protein	Plasmid	aminoglycoside	1	Wastewater Influent
vanY	Phage,Conjugative Element (CE)	glycopeptide	1	Chicken Feces
TEM-128	Plasmid	beta-lactam	1	Wastewater Influent
eptA	Phage	peptide	1	Chicken Feces
TEM-136	Plasmid	beta-lactam	1	Wastewater Influent
TEM-143	Plasmid	beta-lactam	1	Wastewater Influent
emrK	Phage	multidrug	1	Chicken Feces
TEM-166	Plasmid	beta-lactam	1	Wastewater Influent
emrY	Phage	tetracycline	1	Chicken Feces
KPC-17	Integrative Element (IGE)	beta-lactam	1	Hospital Sewage
tet37	Phage,Conjugative Element (CE)	tetracycline	1	Chicken Feces
CTX-M-112	Plasmid	beta-lactam	1	Chicken Feces
mdtO	Phage,Conjugative Element (CE)	multidrug	1	Chicken Feces
lnuG	Plasmid	MLS	1	Wastewater Influent
CTX-M-83	Plasmid	beta-lactam	1	Chicken Feces
CTX-M-84	Plasmid	beta-lactam	1	Chicken Feces
CTX-M-86	Plasmid	beta-lactam	1	Chicken Feces
ACT-12	Plasmid	beta-lactam	1	Migratory Bird Droppings
CTX-M-90	Plasmid	beta-lactam	1	Chicken Feces
ACT-13	Plasmid	beta-lactam	1	Migratory Bird Droppings
ACT-2	Plasmid	beta-lactam	1	Migratory Bird Droppings
lnuC	Plasmid	MLS	1	Chicken Feces
ACT-22	Plasmid	beta-lactam	1	Migratory Bird Droppings
ACT-28	Plasmid	beta-lactam	1	Migratory Bird Droppings
TEM-171	Integrative Element (IGE)	beta-lactam	1	Hospital Sewage
CMY-115	Plasmid	beta-lactam	1	Migratory Bird Droppings
vanY	Plasmid	glycopeptide	1	Chicken Feces
OXA-251	Insertion Sequence (IS)	beta-lactam	1	Wastewater Effluent
catD	Plasmid	phenicol	1	Chicken Feces
NDM-8	Phage,Conjugative Element (CE)	beta-lactam	1	Hospital Sewage
TEM-1	Integrative Element (IGE)	beta-lactam	1	Hospital Sewage
mdtB	Phage,Conjugative Element (CE)	multidrug	1	Surface Water
chloramphenicol_and_florfenicol_exporter	Plasmid	phenicol	1	Chicken Feces
OXA-353	Phage,Conjugative Element (CE)	beta-lactam	1	Wastewater Influent
lsa	Plasmid	MLS	1	Chicken Feces
OXA-352	Phage,Conjugative Element (CE)	beta-lactam	1	Wastewater Influent
CTX-M-51	Plasmid	beta-lactam	1	Chicken Feces
PER-7	Insertion Sequence (IS)	beta-lactam	1	Hospital Sewage
lsaE	Plasmid	MLS	1	Wastewater Influent
NDM-6	Phage,Conjugative Element (CE)	beta-lactam	1	Hospital Sewage
CTX-M-113	Plasmid	beta-lactam	1	Chicken Feces
OXA-351	Phage,Conjugative Element (CE)	beta-lactam	1	Wastewater Influent
CTX-M-125	Plasmid	beta-lactam	1	Chicken Feces
MCR-5	Plasmid	peptide	1	Hospital Sewage
CTX-M-129	Plasmid	beta-lactam	1	Chicken Feces
vatE	Integrative Element (IGE),Phage	MLS	1	Cow Manure
CTX-M-134	Plasmid	beta-lactam	1	Chicken Feces
vatB	Integrative Element (IGE),Phage	MLS	1	Cow Manure
CTX-M-14	Plasmid	beta-lactam	1	Chicken Feces
CTX-M-17	Plasmid	beta-lactam	1	Chicken Feces
mdtN	Phage,Conjugative Element (CE)	multidrug	1	Chicken Feces
OXA-246	Insertion Sequence (IS)	beta-lactam	1	Wastewater Effluent
CTX-M-24	Plasmid	beta-lactam	1	Chicken Feces
emrE	Integrative Element (IGE),Phage	multidrug	1	Cow Manure
CTX-M-38	Plasmid	beta-lactam	1	Chicken Feces
vatG	Plasmid	MLS	1	Chicken Feces
NDM-7	Phage,Conjugative Element (CE)	beta-lactam	1	Hospital Sewage
lnuB	Plasmid	MLS	1	Wastewater Influent
KPC-9	Integrative Element (IGE)	beta-lactam	1	Hospital Sewage
clbA	Phage	phenicol	1	Chicken Feces
KPC-22	Integrative Element (IGE)	beta-lactam	1	Hospital Sewage
TolC	Integrative Element (IGE)	multidrug	1	Chicken Feces
KPC-4	Integrative Element (IGE)	beta-lactam	1	Hospital Sewage
OXA-28	Insertion Sequence (IS)	beta-lactam	1	Wastewater Effluent
AAC(6')-Ie-APH(2'')-Ia	Phage,Conjugative Element (CE)	aminoglycoside	1	Chicken Feces
KPC-3	Integrative Element (IGE)	beta-lactam	1	Hospital Sewage
truncated_putative_response_regulator_ArlR	Phage,Plasmid	unclassified	1	Migratory Bird Droppings
APH(2'')-If	Phage,Conjugative Element (CE)	aminoglycoside	1	Chicken Feces
NDM-9	Phage,Conjugative Element (CE)	beta-lactam	1	Hospital Sewage
bifunctional_aminoglycoside_N-acetyltransferase_and_aminoglycoside_phosphotransferase	Phage,Conjugative Element (CE)	aminoglycoside	1	Chicken Feces
oprJ	Phage	multidrug	1	Surface Water
catD	Phage,Conjugative Element (CE)	phenicol	1	Chicken Feces
lnuC	Plasmid,Conjugative Element (CE)	MLS	1	Chicken Feces
OXA-354	Phage,Conjugative Element (CE)	beta-lactam	1	Wastewater Influent
cat_chloramphenicol_acetyltransferase	Phage,Conjugative Element (CE)	phenicol	1	Chicken Feces
cfrC	Phage,Conjugative Element (CE)	phenicol	1	Chicken Feces
chloramphenicol_and_florfenicol_resistance	Phage,Conjugative Element (CE)	phenicol	1	Chicken Feces
KPC-2	Integrative Element (IGE)	beta-lactam	1	Hospital Sewage
GES-26	Plasmid	beta-lactam	1	Hospital Sewage
KPC-19	Integrative Element (IGE)	beta-lactam	1	Hospital Sewage
antibiotic_resistance_rRNA_adenine_methyltransferase	Phage	unclassified	1	Chicken Feces
16S_rRNA_methylase	Phage,Conjugative Element (CE)	unclassified	1	Chicken Feces
KPC-5	Integrative Element (IGE)	beta-lactam	1	Hospital Sewage
dfrA20	Phage	diaminopyrimidine	1	Surface Water
mefA	Integrative Element (IGE),Phage	MLS	1	Cow Manure
mexQ	Plasmid	multidrug	1	Wastewater Effluent
MuxB	Phage,Conjugative Element (CE)	multidrug	1	Surface Water
KPC-8	Integrative Element (IGE)	beta-lactam	1	Hospital Sewage
QnrD2	Plasmid	fluoroquinolone	1	Migratory Bird Droppings
oprJ	Plasmid	multidrug	1	Hospital Sewage
mdtN	Phage	multidrug	1	Chicken Feces
mdtP	Phage,Conjugative Element (CE)	multidrug	1	Chicken Feces
mdtO	Phage	multidrug	1	Chicken Feces
KPC-7	Integrative Element (IGE)	beta-lactam	1	Hospital Sewage
mdtP	Phage	multidrug	1	Chicken Feces
adeF	Plasmid	multidrug	1	Wastewater Effluent
lsa	Integrative Element (IGE),Phage	MLS	1	Cow Manure
hmrM	Phage	multidrug	1	Wastewater Influent
vanY	Phage	glycopeptide	1	Chicken Feces
MOX-9	Plasmid	beta-lactam	1	Hospital Sewage
linG	Plasmid	MLS	1	Hospital Sewage
patA	Integrative Element (IGE)	fluoroquinolone	1	Chicken Feces
lnuF	Plasmid	MLS	1	Hospital Sewage
dfrA8	Phage	diaminopyrimidine	1	Surface Water
KPC-6	Integrative Element (IGE)	beta-lactam	1	Hospital Sewage

## Sheet: Table S8_old
Table S9: Network-derived ARG-MGE combinations related to HHRR
ARG	MGE	ARG Phenotype	Number of Environments Detected In	Environments detected in
tetM	Phage	tetracycline	9	Chicken Feces, Cow Manure, Wastewaster Effluent, Hospital Sewage, Human Gut, Wastewater Influent, Migratory Bird Droppings, Pig Feces, Surface Water
APH(6)-Id	Plasmid	aminoglycoside	8	Activated Sludge, Chicken Feces, Wastewaster Effluent, Hospital Sewage, Human Gut, Wastewater Influent, Migratory Bird Droppings, Surface Water
tetM	Integrative Element (IGE)	tetracycline	8	Chicken Feces, Cow Manure, Hospital Sewage, Human Gut, Wastewater Influent, Migratory Bird Droppings, Pig Feces, Surface Water
TEM-34	Plasmid	beta-lactam	8	Chicken Feces, Wastewaster Effluent, Hospital Sewage, Human Gut, Wastewater Influent, Migratory Bird Droppings, Pig Feces, Surface Water
tetM	Integrative Element (IGE),Conjugative Element (CE)	tetracycline	8	Chicken Feces, Cow Manure, Hospital Sewage, Human Gut, Wastewater Influent, Migratory Bird Droppings, Pig Feces, Surface Water
TEM-217	Plasmid	beta-lactam	7	Chicken Feces, Wastewaster Effluent, Hospital Sewage, Human Gut, Wastewater Influent, Pig Feces, Surface Water
TEM-150	Plasmid	beta-lactam	7	Chicken Feces, Wastewaster Effluent, Hospital Sewage, Human Gut, Wastewater Influent, Pig Feces, Surface Water
TEM-171	Plasmid	beta-lactam	7	Chicken Feces, Wastewaster Effluent, Hospital Sewage, Human Gut, Wastewater Influent, Pig Feces, Surface Water
CMY-63	Plasmid	beta-lactam	7	Chicken Feces, Wastewaster Effluent, Hospital Sewage, Human Gut, Wastewater Influent, Migratory Bird Droppings, Surface Water
CMY-20	Plasmid	beta-lactam	7	Chicken Feces, Wastewaster Effluent, Hospital Sewage, Human Gut, Wastewater Influent, Migratory Bird Droppings, Surface Water
TEM-33	Plasmid	beta-lactam	7	Chicken Feces, Wastewaster Effluent, Hospital Sewage, Human Gut, Wastewater Influent, Pig Feces, Surface Water
CMY-64	Plasmid	beta-lactam	7	Chicken Feces, Wastewaster Effluent, Hospital Sewage, Human Gut, Wastewater Influent, Migratory Bird Droppings, Surface Water
floR	Plasmid	phenicol	7	Chicken Feces, Wastewaster Effluent, Hospital Sewage, Wastewater Influent, Migratory Bird Droppings, Pig Feces, Surface Water
TEM-206	Plasmid	beta-lactam	7	Chicken Feces, Wastewaster Effluent, Hospital Sewage, Human Gut, Wastewater Influent, Pig Feces, Surface Water
ANT(3'')-Ii-AAC(6')-IId	Plasmid	aminoglycoside	7	Activated Sludge, Chicken Feces, Wastewaster Effluent, Hospital Sewage, Wastewater Influent, Migratory Bird Droppings, Surface Water
CMY-53	Plasmid	beta-lactam	7	Chicken Feces, Wastewaster Effluent, Hospital Sewage, Human Gut, Wastewater Influent, Migratory Bird Droppings, Surface Water
TEM-105	Plasmid	beta-lactam	7	Chicken Feces, Wastewaster Effluent, Hospital Sewage, Human Gut, Wastewater Influent, Pig Feces, Surface Water
CMY-46	Plasmid	beta-lactam	7	Chicken Feces, Wastewaster Effluent, Hospital Sewage, Human Gut, Wastewater Influent, Migratory Bird Droppings, Surface Water
TEM-1	Plasmid	beta-lactam	7	Chicken Feces, Wastewaster Effluent, Hospital Sewage, Human Gut, Wastewater Influent, Pig Feces, Surface Water
CMY-118	Plasmid	beta-lactam	7	Chicken Feces, Wastewaster Effluent, Hospital Sewage, Human Gut, Wastewater Influent, Migratory Bird Droppings, Surface Water
tolC	Plasmid	multidrug	7	Chicken Feces, Wastewaster Effluent, Hospital Sewage, Human Gut, Wastewater Influent, Migratory Bird Droppings, Surface Water
CMY-35	Plasmid	beta-lactam	6	Chicken Feces, Hospital Sewage, Human Gut, Wastewater Influent, Migratory Bird Droppings, Surface Water
APH(6)-Id	Phage	aminoglycoside	6	Activated Sludge, Wastewaster Effluent, Hospital Sewage, Wastewater Influent, Migratory Bird Droppings, Surface Water
CMY-108	Plasmid	beta-lactam	6	Chicken Feces, Hospital Sewage, Human Gut, Wastewater Influent, Migratory Bird Droppings, Surface Water
ErmB	Plasmid	MLS	6	Activated Sludge, Chicken Feces, Hospital Sewage, Human Gut, Wastewater Influent, Pig Feces
tetM	Phage,Conjugative Element (CE)	tetracycline	6	Chicken Feces, Cow Manure, Hospital Sewage, Human Gut, Wastewater Influent, Pig Feces
TEM-17	Plasmid	beta-lactam	6	Chicken Feces, Hospital Sewage, Human Gut, Wastewater Influent, Pig Feces, Surface Water
AAC(6')-Ib7	Plasmid	aminoglycoside	5	Activated Sludge, Wastewaster Effluent, Hospital Sewage, Wastewater Influent, Surface Water
CMY-13	Plasmid	beta-lactam	5	Chicken Feces, Hospital Sewage, Human Gut, Wastewater Influent, Migratory Bird Droppings
lnuB	Phage	MLS	5	Hospital Sewage, Wastewater Influent, Migratory Bird Droppings, Pig Feces, Surface Water
lsaE	Phage	MLS	5	Hospital Sewage, Wastewater Influent, Migratory Bird Droppings, Pig Feces, Surface Water
ANT(6)-Ia	Phage	aminoglycoside	5	Chicken Feces, Cow Manure, Human Gut, Migratory Bird Droppings, Pig Feces
mdtE	Plasmid	multidrug	5	Chicken Feces, Hospital Sewage, Human Gut, Wastewater Influent, Migratory Bird Droppings
gadX	Plasmid	multidrug	5	Chicken Feces, Hospital Sewage, Human Gut, Wastewater Influent, Migratory Bird Droppings
CMY-40	Plasmid	beta-lactam	5	Chicken Feces, Hospital Sewage, Human Gut, Wastewater Influent, Migratory Bird Droppings
tetM	Plasmid	tetracycline	5	Chicken Feces, Human Gut, Wastewater Influent, Pig Feces, Surface Water
CMY-35	Phage	beta-lactam	4	Chicken Feces, Hospital Sewage, Human Gut, Migratory Bird Droppings
QnrS11	Plasmid	fluoroquinolone	4	Chicken Feces, Wastewaster Effluent, Hospital Sewage, Wastewater Influent
CMY-20	Phage	beta-lactam	4	Chicken Feces, Hospital Sewage, Human Gut, Migratory Bird Droppings
CMY-13	Phage,Conjugative Element (CE)	beta-lactam	4	Chicken Feces, Hospital Sewage, Human Gut, Migratory Bird Droppings
CMY-46	Phage	beta-lactam	4	Chicken Feces, Hospital Sewage, Human Gut, Migratory Bird Droppings
QnrS10	Plasmid	fluoroquinolone	4	Chicken Feces, Wastewaster Effluent, Hospital Sewage, Wastewater Influent
CMY-53	Phage	beta-lactam	4	Chicken Feces, Hospital Sewage, Human Gut, Migratory Bird Droppings
CMY-63	Phage	beta-lactam	4	Chicken Feces, Hospital Sewage, Human Gut, Migratory Bird Droppings
CMY-118	Phage,Conjugative Element (CE)	beta-lactam	4	Chicken Feces, Hospital Sewage, Human Gut, Migratory Bird Droppings
dfrA17	Plasmid	diaminopyrimidine	4	Chicken Feces, Hospital Sewage, Human Gut, Migratory Bird Droppings
CMY-64	Phage	beta-lactam	4	Chicken Feces, Hospital Sewage, Human Gut, Migratory Bird Droppings
APH(3')-IIIa	Integrative Element (IGE)	aminoglycoside	4	Chicken Feces, Wastewater Influent, Migratory Bird Droppings, Pig Feces
CMY-118	Phage	beta-lactam	4	Chicken Feces, Hospital Sewage, Human Gut, Migratory Bird Droppings
ErmB	Phage	MLS	4	Hospital Sewage, Human Gut, Wastewater Influent, Pig Feces
CMY-53	Phage,Conjugative Element (CE)	beta-lactam	4	Chicken Feces, Hospital Sewage, Human Gut, Migratory Bird Droppings
QnrS4	Plasmid	fluoroquinolone	4	Chicken Feces, Wastewaster Effluent, Hospital Sewage, Wastewater Influent
aad(6)	Phage	aminoglycoside	4	Chicken Feces, Cow Manure, Human Gut, Pig Feces
QnrS2	Plasmid	fluoroquinolone	4	Chicken Feces, Wastewaster Effluent, Hospital Sewage, Wastewater Influent
QnrS6	Plasmid	fluoroquinolone	4	Chicken Feces, Wastewaster Effluent, Hospital Sewage, Wastewater Influent
QnrS7	Plasmid	fluoroquinolone	4	Chicken Feces, Wastewaster Effluent, Hospital Sewage, Wastewater Influent
QnrS15	Plasmid	fluoroquinolone	4	Chicken Feces, Wastewaster Effluent, Hospital Sewage, Wastewater Influent
QnrS8	Plasmid	fluoroquinolone	4	Chicken Feces, Wastewaster Effluent, Hospital Sewage, Wastewater Influent
CMY-35	Phage,Conjugative Element (CE)	beta-lactam	4	Chicken Feces, Hospital Sewage, Human Gut, Migratory Bird Droppings
QnrS12	Plasmid	fluoroquinolone	4	Chicken Feces, Wastewaster Effluent, Hospital Sewage, Wastewater Influent
QnrS9	Plasmid	fluoroquinolone	4	Chicken Feces, Wastewaster Effluent, Hospital Sewage, Wastewater Influent
CMY-20	Phage,Conjugative Element (CE)	beta-lactam	4	Chicken Feces, Hospital Sewage, Human Gut, Migratory Bird Droppings
tolC	Phage	multidrug	4	Chicken Feces, Hospital Sewage, Human Gut, Migratory Bird Droppings
QnrS3	Plasmid	fluoroquinolone	4	Chicken Feces, Wastewaster Effluent, Hospital Sewage, Wastewater Influent
CMY-77	Plasmid	beta-lactam	4	Chicken Feces, Hospital Sewage, Human Gut, Wastewater Influent
QnrS1	Plasmid	fluoroquinolone	4	Chicken Feces, Wastewaster Effluent, Hospital Sewage, Wastewater Influent
dfrA15	Plasmid	diaminopyrimidine	3	Chicken Feces, Hospital Sewage, Migratory Bird Droppings
OXA-233	Plasmid	beta-lactam	3	Wastewaster Effluent, Hospital Sewage, Wastewater Influent
dfrA15b	Plasmid	diaminopyrimidine	3	Chicken Feces, Hospital Sewage, Migratory Bird Droppings
dfrA1	Plasmid	diaminopyrimidine	3	Chicken Feces, Hospital Sewage, Migratory Bird Droppings
OXA-17	Plasmid	beta-lactam	3	Wastewaster Effluent, Hospital Sewage, Wastewater Influent
APH(3')-Ia	Plasmid	aminoglycoside	3	Wastewaster Effluent, Hospital Sewage, Migratory Bird Droppings
OXA-16	Plasmid	beta-lactam	3	Wastewaster Effluent, Hospital Sewage, Wastewater Influent
OXA-142	Plasmid	beta-lactam	3	Wastewaster Effluent, Hospital Sewage, Wastewater Influent
dfrA14	Plasmid	diaminopyrimidine	3	Chicken Feces, Hospital Sewage, Migratory Bird Droppings
AAC(3)-IIe	Plasmid	aminoglycoside	3	Chicken Feces, Hospital Sewage, Wastewater Influent
OXA-240	Plasmid	beta-lactam	3	Wastewaster Effluent, Hospital Sewage, Wastewater Influent
OXA-246	Plasmid	beta-lactam	3	Wastewaster Effluent, Hospital Sewage, Wastewater Influent
dfrA25	Plasmid	diaminopyrimidine	3	Chicken Feces, Hospital Sewage, Migratory Bird Droppings
OXA-251	Plasmid	beta-lactam	3	Wastewaster Effluent, Hospital Sewage, Wastewater Influent
dfrA29	Plasmid	diaminopyrimidine	3	Chicken Feces, Hospital Sewage, Migratory Bird Droppings
OXA-256	Plasmid	beta-lactam	3	Wastewaster Effluent, Hospital Sewage, Wastewater Influent
OXA-74	Plasmid	beta-lactam	3	Wastewaster Effluent, Hospital Sewage, Wastewater Influent
dfrA5	Plasmid	diaminopyrimidine	3	Chicken Feces, Hospital Sewage, Migratory Bird Droppings
AAC(6')-Ie-APH(2'')-Ia	Plasmid	aminoglycoside	3	Chicken Feces, Hospital Sewage, Wastewater Influent
OXA-368	Plasmid	beta-lactam	3	Wastewaster Effluent, Hospital Sewage, Wastewater Influent
AAC(3)-IId	Plasmid	aminoglycoside	3	Chicken Feces, Hospital Sewage, Wastewater Influent
OXA-663	Plasmid	beta-lactam	3	Wastewaster Effluent, Hospital Sewage, Wastewater Influent
OXA-454	Plasmid	beta-lactam	3	Wastewaster Effluent, Hospital Sewage, Wastewater Influent
OXA-10	Plasmid	beta-lactam	3	Wastewaster Effluent, Hospital Sewage, Wastewater Influent
OXA-14	Plasmid	beta-lactam	3	Wastewaster Effluent, Hospital Sewage, Wastewater Influent
CMY-64	Phage,Conjugative Element (CE)	beta-lactam	3	Chicken Feces, Hospital Sewage, Human Gut
cmlA1	Plasmid	phenicol	3	Hospital Sewage, Wastewater Influent, Surface Water
APH(3')-IIIa	Phage	aminoglycoside	3	Chicken Feces, Migratory Bird Droppings, Pig Feces
ANT(6)-Ia	Plasmid	aminoglycoside	3	Chicken Feces, Hospital Sewage, Wastewater Influent
APH(3')-IIIa	Phage,Conjugative Element (CE)	aminoglycoside	3	Chicken Feces, Migratory Bird Droppings, Pig Feces
CMY-108	Phage	beta-lactam	3	Chicken Feces, Hospital Sewage, Human Gut
CMY-63	Phage,Conjugative Element (CE)	beta-lactam	3	Chicken Feces, Hospital Sewage, Human Gut
cmlA4	Plasmid	phenicol	3	Hospital Sewage, Wastewater Influent, Surface Water
CMY-46	Phage,Conjugative Element (CE)	beta-lactam	3	Chicken Feces, Hospital Sewage, Human Gut
AAC(6')-Ib9	Plasmid	aminoglycoside	3	Activated Sludge, Hospital Sewage, Wastewater Influent
mphA	Plasmid	MLS	3	Chicken Feces, Hospital Sewage, Wastewater Influent
CMY-2	Plasmid	beta-lactam	3	Hospital Sewage, Wastewater Influent, Migratory Bird Droppings
tetM	Plasmid,Conjugative Element (CE)	tetracycline	3	Chicken Feces, Cow Manure, Pig Feces
CMY-108	Phage,Conjugative Element (CE)	beta-lactam	3	Chicken Feces, Hospital Sewage, Human Gut
aad(6)	Plasmid	aminoglycoside	3	Chicken Feces, Hospital Sewage, Wastewater Influent
AAC(6')-30/AAC(6')-Ib'	Plasmid	aminoglycoside	3	Activated Sludge, Hospital Sewage, Wastewater Influent
cmlA5	Plasmid	phenicol	3	Hospital Sewage, Wastewater Influent, Surface Water
AAC(6')-Ib-cr	Plasmid	aminoglycoside	3	Activated Sludge, Hospital Sewage, Wastewater Influent
CMY-13	Phage	beta-lactam	3	Chicken Feces, Human Gut, Migratory Bird Droppings
[truncated: 307 more rows]

## Sheet: Table S8
Table S8: Overview of ARGs contributing significantly to ERR in certain environments, as determined by random forest regression analysis. ARGs that encode “medically important” drug classes defined by the WHO report [46] are highlighted in red. Rank I, II, III and IV ARGs from Zhang et al. are highlighted in blue [13].
[truncated: 381 more rows]

[truncated: 6 more sheets: Table S9, Table S9_old, Table S10, Table S11, Table S12, Table S13]
